# Supplementary material for: Regulating microbiome metabolic stability for stable indigenous liquor fermentation
Source: bioRxiv preprint, doi:10.1101/2023.04.21.537800, version 1 (2023-04-21)
Supplement: supplementary dataset 2 [file 537800_file12.xlsx]

## Sheet: Dynamics of parameters
Dynamics of fermentation parameters throughout industrial fermentations
Fermentation time (days)	Acidity	Reducing sugar	Miosture	Starch	Alcohols	Acetate
0	0.50122	0.23346	0.4506	0.52705	0.1474	0.52778
0	0.48411	0.23346	0.47774	0.50283	0.20231	0.44444
0	0.43521	0.30882	0.49566	0.53993	0.21387	0.47222
0	0.36186	0.17831	0.43322	0.5492	0.10116	0.33333
0	0.46455	0.28309	0.38817	0.61412	0.1474	0.47222
0	0.511	0.27757	0.46037	0.48738	0.15318	0.52778
0	0.5599	0.36765	0.46634	0.52447	0.12717	0.66667
0	0.47922	0.35662	0.43974	0.55332	0.15607	0.5
0	0.4401	0.19669	0.43594	0.54508	0.16474	0.44444
0	0.37164	0.38787	0.41477	0.58475	0.10983	0.44444
0	0.489	0.22978	0.43431	0.52344	0.11561	0.38889
0	0.32274	0.1875	0.44951	0.58475	0.18497	0.25
0	0.32763	0.36213	0.40662	0.5456	0.18208	0.41667
0	0.32029	0.24449	0.47448	0.48583	0.25145	0.22222
0	0.40098	0.27757	0.33822	0.62133	0.16474	0.38889
0	0.4621	0.38235	0.40825	0.62957	0.20809	0.5
0	0.52078	0.31066	0.42128	0.51623	0.15318	0.47222
0	0.37408	0.34743	0.49729	0.51777	0.29769	0.41667
0	0.32763	0.19669	0.43214	0.5152	0.24277	0.30556
0	0.48411	0.33456	0.48426	0.51829	0.24855	0.44444
0	0.31785	0.32537	0.4316	0.5863	0.19075	0.33333
0	0.40098	0.25368	0.50651	0.50438	0.23699	0.41667
0	0.46455	0.25368	0.47774	0.52396	0.16763	0.38889
0	0.37897	0.27022	0.40771	0.60021	0.1763	0.44444
0	0.34474	0.26654	0.53366	0.44668	0.42775	0.25
0	0.4401	0.23162	0.46417	0.5322	0.16185	0.44444
0	0.61369	0.40257	0.41314	0.53735	0.10983	0.58333
0	0.49878	0.17096	0.4924	0.44307	0.20231	0.44444
0	0.489	0.28125	0.50054	0.46007	0.10983	0.61111
0	0.37408	0.24816	0.51412	0.48377	0.19075	0.41667
0	0.34963	0.19485	0.43431	0.58578	0.23699	0.38889
0	0.51834	0.20037	0.51737	0.48223	0.16474	0.47222
0	0.58924	0.22059	0.45874	0.49253	0.14451	0.52778
0	0.55257	0.22059	0.45765	0.53735	0.21676	0.38889
0	0.37408	0.40993	0.49131	0.54044	0.26301	0.36111
0	0.52567	0.26103	0.52877	0.45956	0.15607	0.47222
0	0.51345	0.20956	0.56189	0.48326	0.21676	0.47222
0	0.55746	0.26654	0.56135	0.3797	0.13873	0.55556
0	0.43521	0.20772	0.49891	0.49923	0.17341	0.41667
0	0.48411	0.18015	0.48914	0.49304	0.1763	0.44444
0	0.50367	0.16912	0.51303	0.48223	0.18208	0.33333
0	0.3643	0.25368	0.42562	0.51468	0.2052	0.36111
0	0.57213	0.24265	0.45494	0.51314	0.15607	0.47222
0	0.33985	0.29044	0.49457	0.50283	0.2341	0.25
0	0.30807	0.29596	0.48914	0.50902	0.2948	0.33333
0	0.46944	0.26471	0.46417	0.51571	0.19075	0.38889
0	0.40831	0.31434	0.50543	0.52911	0.18786	0.36111
0	0.53301	0.20221	0.44028	0.5219	0.16474	0.5
0	0.43765	0.27757	0.5494	0.43637	0.2052	0.41667
0	0.31785	0.11397	0.51249	0.44565	0.2659	0.36111
0	0.45721	0.20221	0.44734	0.51623	0.16763	0.33333
0	0.33007	0.22426	0.50271	0.50799	0.24566	0.38889
0	0.57702	0.22059	0.46037	0.46007	0.0896	0.55556
0	0.2445	0.20588	0.36916	0.60793	0.17919	0.13889
0	0.26161	0.1875	0.46254	0.53787	0.17052	0.27778
0	0.47433	0.31801	0.45114	0.56208	0.17341	0.47222
0	0.28362	0.17831	0.37134	0.5863	0.19653	0.19444
0	0.41809	0.21324	0.47394	0.48686	0.19653	0.47222
0	0.34474	0.2114	0.52714	0.50438	0.15607	0.47222
0	0.38875	0.20037	0.46906	0.46677	0.19364	0.36111
0	0.43765	0.3364	0.40011	0.57908	0.10405	0.47222
0	0.50856	0.27574	0.45168	0.50232	0.15896	0.44444
0	0.59413	0.35662	0.46743	0.49304	0.15607	0.58333
0	0.40098	0.23346	0.45874	0.54096	0.18497	0.25
0	0.46699	0.28309	0.42562	0.57393	0.13873	0.52778
0	0.40587	0.27757	0.35831	0.57754	0.12428	0.38889
0	0.3423	0.22426	0.4506	0.54405	0.20231	0.33333
0	0.53545	0.30515	0.48426	0.47295	0.1185	0.47222
0	0.39853	0.36765	0.40282	0.5796	0.15896	0.47222
0	0.28851	0.29412	0.41205	0.55796	0.20231	0.30556
0	0.48411	0.33456	0.41965	0.54714	0.13295	0.38889
0	0.46944	0.34559	0.42997	0.51262	0.19075	0.44444
0	0.489	0.25	0.4962	0.47759	0.2341	0.47222
0	0.49144	0.20588	0.49023	0.50489	0.24277	0.36111
0	0.41809	0.20221	0.42834	0.51417	0.26879	0.33333
0	0.43032	0.2261	0.4468	0.53478	0.20231	0.5
0	0.60391	0.2261	0.47611	0.46625	0.21098	0.5
0	0.3643	0.25368	0.55157	0.49098	0.28035	0.30556
0	0.50856	0.28125	0.44571	0.49717	0.29769	0.38889
0	0.40098	0.30882	0.55429	0.47553	0.33815	0.52778
0	0.42543	0.11213	0.5532	0.41628	0.33815	0.36111
0	0.45477	0.23346	0.50977	0.51623	0.30925	0.36111
0	0.45721	0.22794	0.5418	0.45234	0.29191	0.44444
0	0.59169	0.34743	0.43757	0.46986	0.15607	0.58333
0	0.27139	0.17647	0.4886	0.56672	0.33815	0.25
0	0.2445	0.22059	0.53203	0.49253	0.30058	0.22222
0	0.49633	0.20588	0.43377	0.56672	0.21676	0.41667
0	0.42054	0.27574	0.43974	0.59608	0.19653	0.33333
0	0.51345	0.07353	0.40934	0.53014	0.19364	0.41667
0	0.37897	0.23346	0.51303	0.48635	0.2659	0.36111
0	0.45232	0.26103	0.45005	0.51159	0.1474	0.47222
0	0.38875	0.36949	0.38328	0.60175	0.12717	0.41667
0	0.50856	0.36949	0.4506	0.58011	0.0896	0.55556
0	0.42787	0.26287	0.54777	0.43019	0.24566	0.44444
0	0.28117	0.11581	0.52009	0.47501	0.19942	0.19444
0	0.36675	0.26471	0.34365	0.56929	0.14162	0.30556
0	0.16381	0.14706	0.45765	0.53272	0.25434	0.13889
0	0.29095	0.1489	0.4848	0.48016	0.22254	0.27778
0	0.23961	0.12132	0.59229	0.48892	0.27457	0.25
0	0.42543	0.42096	0.51574	0.49614	0.11561	0.44444
0	0.30318	0.29412	0.47666	0.57445	0.2341	0.38889
0	0.2934	0.19118	0.47883	0.57908	0.21676	0.36111
0	0.43765	0.18566	0.47828	0.56929	0.25723	0.44444
0	0.34719	0.21691	0.48914	0.56517	0.1474	0.41667
0	0.45477	0.15809	0.50109	0.52653	0.23121	0.36111
0	0.39364	0.1636	0.4316	0.50335	0.18497	0.36111
0	0.3154	0.12684	0.43757	0.52447	0.15607	0.25
0	0.41809	0.29963	0.45928	0.55744	0.16763	0.44444
0	0.45232	0.28309	0.47666	0.50902	0.21965	0.58333
0	0.39364	0.11765	0.5266	0.47707	0.19942	0.38889
0	0.30807	0.12316	0.44137	0.55435	0.25723	0.30556
0	0.44988	0.23346	0.54343	0.47192	0.31503	0.47222
0	0.39853	0.46875	0.43377	0.57702	0.10405	0.61111
0	0.41809	0.27941	0.40174	0.57445	0.16763	0.38889
0	0.43765	0.24265	0.45168	0.45698	0.20231	0.38889
0	0.41565	0.21875	0.44083	0.5085	0.1185	0.36111
0	0.52812	0.33088	0.44897	0.48274	0.12139	0.5
0	0.489	0.24081	0.46688	0.45853	0.17341	0.47222
0	0.37897	0.09375	0.51737	0.46677	0.19075	0.22222
0	0.30073	0.24632	0.53474	0.4915	0.25145	0.27778
0	0.45721	0.1636	0.38382	0.48686	0.18208	0.33333
0	0.60391	0.3364	0.40445	0.53581	0.12428	0.58333
0	0.47677	0.30515	0.4696	0.48532	0.22832	0.5
0	0.38875	0.14522	0.48046	0.51056	0.1185	0.44444
0	0.51345	0.26838	0.46634	0.50077	0.20231	0.52778
0	0.50856	0.25184	0.45168	0.55332	0.17341	0.41667
0	0.50611	0.29779	0.42617	0.57754	0.19653	0.44444
0	0.32274	0.31066	0.44897	0.54353	0.19364	0.38889
0	0.41565	0.20037	0.51194	0.51211	0.21965	0.30556
0	0.30562	0.20404	0.5684	0.44049	0.28324	0.27778
0	0.49144	0.23529	0.48969	0.47038	0.16185	0.44444
0	0.59902	0.39522	0.44137	0.51726	0.11272	0.58333
0	0.56235	0.34926	0.48697	0.45853	0.13584	0.61111
0	0.50122	0.63787	0.38274	0.60381	0.10983	0.63889
0	0.49389	0.13603	0.4658	0.45028	0.19075	0.41667
0	0.54034	0.23897	0.42725	0.52756	0.14451	0.41667
0	0.45477	0.23162	0.5608	0.41731	0.21098	0.44444
0	0.39609	0.23529	0.41694	0.53014	0.19653	0.38889
0	0.57213	0.28309	0.45277	0.51314	0.17052	0.47222
0	0.47433	0.30147	0.44788	0.52962	0.17052	0.47222
0	0.20293	0.1489	0.50217	0.47759	0.28613	0.22222
0	0.40098	0.18934	0.46906	0.46522	0.19364	0.33333
0	0.46699	0.23162	0.47014	0.52087	0.28324	0.38889
0	0.49878	0.31066	0.39685	0.56105	0.09249	0.55556
0	0.56724	0.26654	0.51086	0.4374	0.15607	0.55556
0	0.47433	0.22059	0.53312	0.42813	0.26301	0.41667
0	0.44743	0.29779	0.4772	0.51777	0.18497	0.38889
0	0.42543	0.23162	0.45711	0.51365	0.21098	0.38889
0	0.35697	0.27022	0.42508	0.59196	0.17919	0.33333
0	0.49389	0.29412	0.40554	0.54766	0.13295	0.41667
0	0.33007	0.24632	0.4848	0.51468	0.28902	0.33333
0	0.49633	0.31985	0.4164	0.51056	0.19653	0.41667
0	0.54279	0.19485	0.42834	0.51829	0.1763	0.47222
0	0.59413	0.27022	0.44625	0.47295	0.12428	0.5
0	0.4401	0.34559	0.45331	0.52602	0.19364	0.47222
0	0.48411	0.2261	0.42182	0.46265	0.14451	0.41667
0	0.38386	0.20037	0.44788	0.54405	0.18786	0.30556
0	0.4132	0.20037	0.52769	0.46368	0.24855	0.33333
0	0.47433	0.42831	0.42725	0.51262	0.13873	0.5
0	0.43276	0.26838	0.51954	0.46007	0.21387	0.47222
0	0.46944	0.22059	0.46037	0.45389	0.15318	0.5
0	0.27139	0.22243	0.47828	0.50438	0.26879	0.27778
0	0.37164	0.34926	0.42617	0.56363	0.15896	0.44444
0	0.41076	0.27574	0.4734	0.52602	0.17052	0.36111
0	0.45966	0.15809	0.51629	0.43586	0.17341	0.41667
0	0.27628	0.17647	0.52986	0.48223	0.25723	0.19444
0	0.39364	0.15441	0.49023	0.48377	0.19075	0.33333
0	0.42298	0.22794	0.42725	0.56208	0.23699	0.30556
0	0.50611	0.42096	0.55157	0.46419	0.12428	0.55556
0	0.57213	0.34743	0.46417	0.47295	0.12428	0.52778
0	0.23961	0.13051	0.61781	0.38382	0.22543	0.25
0	0.39609	0.25184	0.49131	0.49253	0.27746	0.44444
0	0.37653	0.21324	0.52226	0.45647	0.24277	0.41667
0	0.37653	0.25551	0.45005	0.55693	0.21098	0.30556
0	0.47188	0.2886	0.4468	0.50747	0.13873	0.41667
0	0.24939	0.25184	0.44625	0.53941	0.21676	0.30556
0	0.42298	0.2114	0.47774	0.49408	0.17052	0.36111
0	0.53056	0.34007	0.54777	0.48171	0.19653	0.5
0	0.48655	0.27574	0.56515	0.43328	0.30925	0.5
0	0.50122	0.21875	0.62921	0.3864	0.13006	0.47222
0	0.3643	0.37316	0.49186	0.50592	0.25434	0.38889
0	0.34719	0.21691	0.47068	0.51726	0.1763	0.27778
0	0.40098	0.26471	0.44788	0.52087	0.2341	0.41667
0	0.32518	0.19301	0.4924	0.50592	0.17052	0.25
0	0.40831	0.31985	0.40771	0.54456	0.10116	0.44444
0	0.30562	0.22243	0.46797	0.50438	0.22543	0.27778
0	0.37408	0.26654	0.43431	0.5662	0.15896	0.36111
0	0.56724	0.35846	0.42671	0.52293	0.19942	0.55556
0	0.56724	0.42096	0.40391	0.53941	0.13295	0.69444
0	0.45477	0.29412	0.5304	0.42968	0.16763	0.52778
0	0.3423	0.38235	0.462	0.56002	0.18208	0.47222
0	0.44254	0.32169	0.38219	0.63318	0.10405	0.41667
0	0.42298	0.34375	0.45114	0.57702	0.21965	0.41667
0	0.40098	0.3125	0.43594	0.54766	0.21965	0.36111
0	0.2445	0.29044	0.50814	0.50232	0.30058	0.30556
0	0.45477	0.23529	0.53855	0.51984	0.22543	0.41667
0	0.55012	0.40809	0.46091	0.53581	0.20231	0.58333
0	0.24939	0.50368	0.41694	0.60896	0.22543	0.41667
0	0.64548	0.40809	0.48371	0.48635	0.1763	0.61111
0	0.40831	0.29963	0.56732	0.38588	0.32948	0.44444
0	0.44988	0.25735	0.43702	0.52138	0.19653	0.36111
0	0.42054	0.28125	0.48751	0.48944	0.24566	0.36111
0	0.35208	0.26654	0.44571	0.58475	0.18786	0.33333
0	0.41565	0.27574	0.49131	0.49665	0.23121	0.36111
0	0.11002	0.20772	0.39631	0.58578	0.11561	0.13889
0	0.42543	0.17831	0.51683	0.46059	0.24277	0.36111
0	0.28606	0.22059	0.40391	0.56466	0.2341	0.30556
0	0.27628	0.32537	0.58632	0.45956	0.00578	0.30556
0	0.50122	0.21324	0.61075	0.46213	0.16185	0.38889
0	0.44988	0.34375	0.61183	0.46935	0.78035	0.55556
0	0.53056	0.29963	0.50977	0.44101	0.21387	0.55556
0	0.38631	0.22059	0.519	0.43586	0.23121	0.41667
0	0.48655	0.4375	0.39631	0.57032	0.16185	0.55556
0	0.4132	0.39522	0.54397	0.48686	0.22254	0.44444
0	0.50611	0.22426	0.46363	0.46419	0.18786	0.47222
0	0.47188	0.22426	0.43105	0.55487	0.26012	0.36111
0	0.2665	0.26103	0.45657	0.55435	0.29769	0.27778
0	0.55257	0.37684	0.34799	0.59866	0.10116	0.58333
0	0.47433	0.26838	0.38382	0.61772	0.16185	0.36111
0	0.55257	0.27941	0.42454	0.48995	0.22543	0.52778
0	0.62592	0.39154	0.48317	0.46265	0.1474	0.63889
0	0.39853	0.43015	0.34473	0.5492	0.18497	0.41667
0	0.61369	0.24816	0.39468	0.52602	0.15029	0.5
0	0.51345	0.45956	0.4202	0.58784	0.16185	0.52778
0	0.43521	0.18566	0.44463	0.53993	0.13584	0.33333
0	0.45232	0.25184	0.52606	0.44874	0.3237	0.44444
0	0.32518	0.15441	0.51357	0.51365	0.21387	0.33333
0	0.43521	0.3125	0.538	0.48377	0.14451	0.44444
0	0.56968	0.42463	0.42562	0.54714	0.10694	0.58333
0	0.61125	0.43566	0.52823	0.45492	0.18208	0.58333
0	0.43521	0.36949	0.51303	0.47244	0.07803	0.52778
0	0.22983	0.24816	0.38925	0.57239	0.17052	0.36111
0	0.44499	0.43015	0.47991	0.51314	0.19364	0.44444
0	0.26895	0.34559	0.54289	0.59248	0.22254	0.27778
0	0.45232	0.23346	0.54615	0.46625	0.29191	0.36111
0	0.30073	0.34375	0.53312	0.48738	0.27168	0.22222
0	0.42543	0.24081	0.55157	0.46728	0.2659	0.33333
0	0.43521	0.17463	0.50163	0.45595	0.27746	0.25
0	0.42054	0.16912	0.57546	0.41113	0.2659	0.33333
0	0.40831	0.20956	0.50217	0.46935	0.25434	0.27778
0	0.45966	0.16728	0.50814	0.51829	0.22832	0.27778
0	0.4132	0.12132	0.54832	0.43328	0.2052	0.25
0	0.42543	0.20404	0.52714	0.44049	0.21676	0.30556
0	0.30562	0.18199	0.48371	0.48326	0.21387	0.27778
0	0.48166	0.14522	0.45331	0.50026	0.18786	0.36111
0	0.39609	0.14154	0.43648	0.52653	0.28324	0.38889
0	0.36675	0.20037	0.47937	0.4745	0.21098	0.36111
0	0.33496	0.27022	0.41748	0.54972	0.20231	0.30556
0	0.12958	0.21691	0.41151	0.48326	0.13873	0.22222
0	0.44254	0.32721	0.41042	0.5018	0.19942	0.33333
0	0.50122	0.125	0.58415	0.36115	0.34971	0.41667
0	0.48411	0.17096	0.48969	0.50335	0.23988	0.30556
0	0.33496	0.23346	0.4658	0.51314	0.17341	0.27778
0	0.17359	0.22059	0.5494	0.51468	0.27746	0.05556
0	0.42298	0.21507	0.54615	0.44719	0.28613	0.44444
0	0.46944	0.15993	0.5114	0.47192	0.24855	0.36111
0	0.2934	0.14706	0.41477	0.52859	0.16763	0.25
0	0.2445	0.10294	0.57003	0.38897	0.21387	0.22222
0	0.04401	0.14154	0.47123	0.49768	0.11561	0.02778
0	0.34719	0.22794	0.43594	0.4915	0.19942	0.25
0	0.33252	0.20404	0.54832	0.46574	0.22543	0.27778
0	0.43032	0.20404	0.47014	0.5085	0.2341	0.33333
0	0.32763	0.25368	0.48643	0.47192	0.2052	0.33333
0	0.35941	0.31801	0.52932	0.52396	0.28035	0.27778
0	0.21516	0.26654	0.59772	0.43019	0.31214	0.16667
0	0.35941	0.18015	0.48534	0.48789	0.27168	0.27778
0	0.51345	0.18015	0.59989	0.38691	0.21098	0.38889
0	0.55746	0.19485	0.52714	0.42555	0.23988	0.5
0	0.52323	0.27757	0.42671	0.47604	0.19364	0.44444
0	0.45721	0.24265	0.5	0.48429	0.20231	0.41667
0	0.58924	0.23713	0.39631	0.51365	0.20809	0.41667
0	0.39853	0.17279	0.47177	0.45286	0.21387	0.30556
0	0.3423	0.19669	0.52226	0.51932	0.20809	0.33333
0	0.30807	0.23897	0.4164	0.62648	0.25434	0.16667
0	0.32763	0.28125	0.50271	0.48326	0.27457	0.33333
0	0.37897	0.20772	0.53094	0.48892	0.24566	0.36111
0	0.46455	0.14706	0.62161	0.3864	0.28324	0.41667
0	0.37164	0.14522	0.65418	0.37867	0.2948	0.38889
0	0.45966	0.22426	0.58958	0.44307	0.33526	0.38889
0	0.36675	0.24816	0.62378	0.39104	0.24277	0.38889
0	0.49878	0.26287	0.63246	0.37713	0.32081	0.41667
0	0.39364	0.24816	0.5114	0.51365	0.32948	0.36111
0	0.20782	0.15993	0.51846	0.47089	0.22832	0.16667
0	0.16381	0.31801	0.27362	0.70531	0.16185	0.22222
0	0.27384	0.34007	0.46743	0.5456	0.27457	0.30556
0	0.33007	0.31985	0.31542	0.67079	0.23699	0.30556
0	0.40098	0.15625	0.49457	0.43689	0.39884	0.38889
0	0.47677	0.27206	0.45548	0.47553	0.24566	0.41667
0	0.38875	0.28493	0.50977	0.46883	0.3237	0.36111
0	0.3423	0.20037	0.54072	0.4745	0.38439	0.33333
0	0.38142	0.19118	0.53855	0.48274	0.36416	0.33333
0	0.41809	0.11213	0.42074	0.4848	0.15607	0.33333
0	0.33007	0.26287	0.55917	0.44719	0.30347	0.30556
0	0.19071	0.16912	0.45874	0.57496	0.17052	0.11111
0	0.47188	0.26103	0.47503	0.49665	0.23699	0.44444
0	0.38386	0.18199	0.44517	0.50696	0.16185	0.27778
0	0.44254	0.17279	0.55917	0.41473	0.28324	0.33333
0	0.51345	0.08824	0.58686	0.39928	0.20809	0.47222
0	0.3154	0.18199	0.53909	0.44204	0.13006	0.36111
0	0.40342	0.20772	0.5646	0.39413	0.26879	0.36111
0	0.34474	0.24081	0.58306	0.41473	0.30347	0.30556
0	0.44254	0.22243	0.57655	0.41422	0.34971	0.36111
0	0.32763	0.26287	0.58035	0.46162	0.32659	0.30556
0	0.29829	0.24449	0.52823	0.53168	0.30058	0.22222
0	0.11247	0.16728	0.29913	0.62803	0.18497	0.13889
0	0.45477	0.21875	0.49729	0.49923	0.17052	0.33333
0	0.39853	0.17096	0.49674	0.45698	0.24566	0.27778
0	0.42054	0.14338	0.5684	0.40495	0.21387	0.36111
0	0.45721	0.22794	0.56135	0.4508	0.3237	0.44444
0	0.2665	0.22059	0.53149	0.44462	0.1763	0.27778
0	0.55012	0.27757	0.42671	0.46316	0.30925	0.44444
0	0.48655	0.19301	0.48154	0.46728	0.3526	0.36111
0	0.33007	0.1636	0.63246	0.44977	0.2659	0.33333
0	0.30073	0.26287	0.36916	0.63369	0.15607	0.25
0	0.31785	0.13235	0.5038	0.47707	0.30058	0.27778
0	0.40831	0.16728	0.48806	0.54199	0.2341	0.27778
0	0.47188	0.10846	0.5228	0.44668	0.27168	0.38889
0	0.29829	0.20588	0.54995	0.41834	0.24566	0.30556
0	0.489	0.28493	0.49674	0.4812	0.30925	0.41667
0	0.39853	0.21507	0.52552	0.40237	0.31792	0.33333
0	0.40342	0.20037	0.64875	0.33282	0.2659	0.38889
0	0.32029	0.20221	0.48317	0.44513	0.25723	0.25
0	0.15403	0.22794	0.57112	0.53065	0.34393	0.19444
0	0.30562	0.25551	0.49891	0.49408	0.21098	0.22222
0	0.29829	0.20772	0.44191	0.52241	0.25434	0.27778
0	0.40098	0.18015	0.49403	0.50644	0.27168	0.33333
0	0.40098	0.16728	0.53094	0.4678	0.24855	0.36111
0	0.41076	0.17831	0.45277	0.48016	0.23699	0.30556
0	0.46699	0.22426	0.55917	0.40392	0.34104	0.38889
0	0.53545	0.2739	0.55592	0.45956	0.23988	0.44444
0	0.34719	0.25184	0.47177	0.46883	0.19364	0.36111
0	0.2934	0.17463	0.56678	0.46986	0.30925	0.27778
0	0.41076	0.28309	0.538	0.46007	0.41618	0.38889
0	0.35697	0.1489	0.481	0.53838	0.2659	0.33333
0	0.44988	0.19485	0.4544	0.50386	0.16474	0.36111
0	0.2665	0.13971	0.45657	0.51468	0.22543	0.19444
0	0.35452	0.15993	0.48046	0.52293	0.18786	0.33333
0	0.27873	0.18566	0.51086	0.47965	0.33526	0.33333
0	0.33252	0.13603	0.57383	0.41731	0.2659	0.36111
0	0.34963	0.24816	0.57872	0.4441	0.32659	0.38889
0	0.40098	0.24816	0.59663	0.44256	0.3526	0.41667
0	0.3912	0.13787	0.56406	0.42143	0.32659	0.36111
0	0.33252	0.3511	0.4848	0.48841	0.23988	0.38889
0	0.3643	0.25551	0.45765	0.56208	0.17919	0.30556
0	0.2445	0.15809	0.52552	0.51674	0.26012	0.30556
0	0.12958	0.22059	0.41151	0.58217	0.16763	0.22222
0	0.40342	0.23897	0.50923	0.47862	0.18497	0.30556
0	0.37897	0.16728	0.40445	0.50489	0.18786	0.41667
0	0.42298	0.31434	0.47937	0.49459	0.2341	0.47222
0	0.4132	0.20956	0.45385	0.48274	0.32081	0.36111
0	0.35208	0.24265	0.42562	0.56569	0.28035	0.36111
0	0.489	0.24449	0.36428	0.57754	0.07803	0.47222
0	0.53301	0.2886	0.57709	0.4271	0.39884	0.41667
0	0.39853	0.16728	0.47557	0.48016	0.24566	0.36111
0	0.31785	0.27941	0.38056	0.59454	0.15029	0.25
0	0.38386	0.23529	0.39142	0.60639	0.17052	0.33333
0	0.23961	0.13419	0.54777	0.43483	0.20809	0.19444
0	0.18093	0.18015	0.49077	0.46007	0.15318	0.25
0	0.2665	0.2261	0.50977	0.47192	0.24566	0.25
0	0.30562	0.29228	0.4392	0.58166	0.22832	0.33333
0	0.25428	0.25	0.32845	0.60742	0.18208	0.25
0	0.62836	0.25184	0.53203	0.45234	0.26301	0.47222
0	0.43521	0.19669	0.50489	0.48326	0.2341	0.30556
0	0.32029	0.22794	0.49511	0.49201	0.34104	0.27778
0	0.42543	0.26287	0.49023	0.46522	0.32659	0.36111
0	0.43765	0.17647	0.40771	0.54302	0.21965	0.33333
0	0.43276	0.11397	0.43594	0.49459	0.22543	0.36111
0	0.41565	0.17279	0.5608	0.40701	0.32081	0.41667
0	0.32029	0.3125	0.50543	0.4812	0.30347	0.33333
0	0.52078	0.26654	0.57492	0.39001	0.43642	0.38889
0	0.45232	0.20588	0.53312	0.45286	0.31792	0.33333
0	0.57946	0.29412	0.56243	0.48944	0.30347	0.44444
0	0.48411	0.26654	0.443	0.53426	0.16763	0.38889
0	0.30073	0.24265	0.57112	0.41937	0.34104	0.25
0	0.4132	0.2261	0.43431	0.51159	0.22543	0.38889
0	0.45477	0.18934	0.49349	0.47501	0.2052	0.36111
0	0.31296	0.14706	0.58143	0.39516	0.26012	0.30556
0	0.3154	0.23713	0.55646	0.44359	0.34971	0.33333
0	0.41565	0.19853	0.55592	0.47501	0.3237	0.33333
0	0.41809	0.27206	0.49023	0.52653	0.30925	0.33333
0	0.511	0.18566	0.50326	0.51005	0.2659	0.41667
0	0.62103	0.21691	0.53312	0.43225	0.35549	0.5
0	0.41809	0.25184	0.44245	0.59042	0.24855	0.38889
0	0.35697	0.30331	0.46851	0.53323	0.20809	0.30556
0	0.3912	0.22794	0.45711	0.47656	0.21098	0.33333
0	0.3912	0.13235	0.29207	0.55899	0.13584	0.33333
0	0.3643	0.25919	0.28447	0.58166	0.12717	0.25
0	0.40342	0.30331	0.443	0.5188	0.2052	0.38889
0	0.26406	0.23897	0.37296	0.57805	0.16185	0.27778
0	0.42298	0.28309	0.36482	0.54147	0.21387	0.38889
0	0.31051	0.25184	0.33713	0.58527	0.19364	0.22222
0	0.60636	0.30147	0.52063	0.44925	0.34393	0.52778
0	0.50367	0.18566	0.67101	0.36734	0.36994	0.5
0	0.50611	0.16544	0.55972	0.43483	0.39306	0.41667
0	0.52323	0.29044	0.53257	0.46471	0.22832	0.41667
0	0.489	0.10846	0.48208	0.45337	0.24855	0.33333
0	0.52078	0.35662	0.42834	0.56414	0.16185	0.36111
0	0.36675	0.29963	0.43865	0.50283	0.24277	0.30556
0	0.50122	0.28493	0.52497	0.47553	0.28324	0.41667
0	0.51589	0.23713	0.51249	0.43019	0.19942	0.41667
0	0.54523	0.24816	0.57655	0.3931	0.22254	0.47222
0	0.52078	0.24449	0.61564	0.38794	0.26012	0.47222
0	0.49633	0.26287	0.59718	0.4544	0.30636	0.41667
0	0.50856	0.24081	0.59175	0.4204	0.31503	0.33333
0	0.5868	0.36213	0.49783	0.47501	0.20231	0.47222
0	0.46699	0.27574	0.44625	0.55899	0.30925	0.36111
0	0.23716	0.45404	0.38599	0.60639	0.30925	0.25
0	0.23961	0.28493	0.40879	0.56569	0.23699	0.22222
0	0.12469	0.15257	0.39577	0.52138	0.13295	0.13889
0	0.53545	0.31066	0.45494	0.51468	0.21387	0.47222
0	0.34963	0.2739	0.52226	0.51984	0.36705	0.33333
0	0.27384	0.25184	0.54289	0.47553	0.32659	0.22222
0	0.45477	0.21507	0.54343	0.42246	0.26879	0.38889
0	0.46455	0.24632	0.52443	0.4338	0.29191	0.38889
0	0.29829	0.38235	0.35396	0.63575	0.23988	0.19444
0	0.42054	0.25184	0.5038	0.45595	0.30636	0.30556
0	0.29829	0.27022	0.45277	0.51726	0.24277	0.25
0	0.39609	0.26103	0.38762	0.52035	0.25434	0.30556
0	0.09535	0.1875	0.56515	0.37558	0.12717	0.25
0	0.37653	0.19669	0.52552	0.45956	0.33237	0.33333
0	0.30562	0.27574	0.52823	0.52447	0.30347	0.30556
0	0.33252	0.29596	0.47231	0.50386	0.21676	0.38889
0	0.34719	0.35478	0.48208	0.49871	0.23699	0.38889
0	0.43276	0.36213	0.32682	0.67646	0.18786	0.33333
0	0.30807	0.23529	0.43214	0.55899	0.26879	0.30556
0	0.40831	0.25919	0.39739	0.54611	0.19653	0.36111
0	0.4621	0.25	0.4696	0.48532	0.20809	0.38889
0	0.31785	0.19853	0.38219	0.57548	0.26012	0.30556
0	0.40342	0.29596	0.48371	0.49614	0.30925	0.38889
0	0.21516	0.17096	0.45928	0.54766	0.19653	0.25
0	0.37164	0.23529	0.42291	0.51468	0.21965	0.33333
0	0.36919	0.30699	0.42834	0.53529	0.16763	0.30556
0	0.42787	0.19853	0.44897	0.53581	0.30925	0.30556
0	0.38875	0.25919	0.4924	0.46677	0.43931	0.38889
0	0.45232	0.28309	0.4468	0.51314	0.26879	0.38889
0	0.4132	0.25368	0.48806	0.49614	0.31214	0.36111
0	0.43032	0.15993	0.5456	0.40392	0.31214	0.36111
0	0.30318	0.22978	0.56732	0.43586	0.28613	0.27778
0	0.42298	0.21691	0.58849	0.43534	0.39595	0.33333
0	0.3643	0.24265	0.60423	0.41525	0.36127	0.25
0	0.50856	0.29412	0.49891	0.46007	0.27746	0.41667
0	0.31296	0.33824	0.44028	0.5559	0.1763	0.25
0	0.35697	0.24081	0.44788	0.53787	0.24277	0.25
0	0.37897	0.375	0.43811	0.55641	0.23121	0.36111
0	0.49389	0.25551	0.47177	0.51571	0.22543	0.38889
0	0.56968	0.30331	0.39685	0.51674	0.16474	0.47222
0	0.40342	0.26654	0.55375	0.42246	0.22254	0.44444
0	0.51834	0.31985	0.44897	0.48377	0.1185	0.47222
0	0.50856	0.27206	0.5304	0.4678	0.21965	0.5
0	0.49144	0.25368	0.40934	0.52499	0.21965	0.38889
0	0.39364	0.21324	0.43214	0.58063	0.23988	0.25
0	0.29095	0.15809	0.39902	0.54766	0.2341	0.27778
0	0.36919	0.18566	0.45657	0.52396	0.17919	0.33333
0	0.19804	0.22426	0.36591	0.58217	0.22832	0.22222
0	0.2934	0.18199	0.53963	0.4374	0.16185	0.30556
0	0.33007	0.27574	0.48751	0.50438	0.17341	0.36111
0	0.35208	0.20404	0.45874	0.55126	0.15896	0.38889
0	0.21271	0.20956	0.39522	0.55487	0.1474	0.25
0	0.35697	0.25551	0.40337	0.52087	0.25434	0.36111
0	0.51834	0.34007	0.48317	0.50489	0.15318	0.41667
0	0.40098	0.2261	0.55212	0.42504	0.30636	0.30556
0	0.54034	0.17096	0.576	0.39361	0.39017	0.47222
0	0.35452	0.19669	0.64387	0.35497	0.32948	0.33333
0	0.50611	0.16728	0.5722	0.43431	0.26879	0.36111
0	0.48655	0.20772	0.67101	0.39104	0.44509	0.38889
0	0.511	0.23346	0.60858	0.38176	0.26879	0.41667
0	0.53056	0.25	0.61129	0.39001	0.32659	0.44444
0	0.4621	0.22426	0.56189	0.43174	0.33815	0.38889
0	0.4132	0.23713	0.5646	0.45647	0.26301	0.27778
0	0.26895	0.28309	0.54452	0.47398	0.25145	0.16667
0	0.42298	0.20221	0.63138	0.39104	0.34682	0.30556
0	0.56479	0.36029	0.50923	0.49047	0.20809	0.55556
0	0.51589	0.18199	0.62812	0.32354	0.35838	0.44444
0	0.489	0.17831	0.59718	0.38743	0.2659	0.44444
0	0.42054	0.3364	0.55755	0.47244	0.18786	0.44444
0	0.41565	0.28309	0.5418	0.4745	0.2341	0.38889
0	0.6088	0.25919	0.58958	0.38949	0.1185	0.5
0	0.4132	0.23713	0.56515	0.45389	0.28035	0.36111
0	0.33741	0.20221	0.51249	0.45544	0.19653	0.25
0	0.49878	0.50735	0.42454	0.5626	0.12139	0.5
0	0.39853	0.35478	0.43431	0.55899	0.29769	0.44444
0	0.11247	0.23162	0.56352	0.46883	0.23988	0.19444
0	0.36186	0.22059	0.55917	0.41473	0.32659	0.36111
0	0.48655	0.36949	0.46417	0.46832	0.17052	0.5
0	0.42054	0.34007	0.57329	0.46832	0.19653	0.44444
0	0.43765	0.33088	0.45874	0.50283	0.14162	0.44444
0	0.47922	0.19301	0.60586	0.40392	0.19075	0.36111
0	0.49389	0.22794	0.5494	0.44256	0.31214	0.44444
0	0.44743	0.21324	0.61889	0.38691	0.31503	0.36111
0	0.08802	0.39338	0.44191	0.65945	0.24855	0.08333
0	0.40831	0.26287	0.42997	0.52962	0.2052	0.33333
0	0.43032	0.16728	0.60641	0.43637	0.31214	0.36111
0	0.42298	0.15625	0.54289	0.43328	0.28324	0.33333
0	0.2176	0.2261	0.55592	0.49665	0.30347	0.22222
0	0.2934	0.25919	0.51466	0.46419	0.18497	0.25
0	0.37164	0.19853	0.54669	0.44565	0.21098	0.30556
0	0.51345	0.23897	0.45711	0.49201	0.06358	0.41667
0	0.46455	0.17096	0.57872	0.43122	0.30636	0.38889
0	0.48655	0.31066	0.59772	0.38846	0.33526	0.41667
0	0.18826	0.31985	0.57438	0.4745	0.25434	0.16667
0	0.39609	0.20037	0.60858	0.43431	0.27746	0.33333
0	0.21027	0.125	0.70955	0.34982	0.26012	0.13889
0	0.489	0.16176	0.53692	0.43328	0.25434	0.38889
0	0.40342	0.22978	0.60912	0.43225	0.37572	0.33333
0	0.52812	0.29412	0.58958	0.43071	0.27746	0.47222
0	0.45477	0.23162	0.58143	0.45337	0.27168	0.38889
0	0.49389	0.25735	0.63138	0.42401	0.2659	0.36111
0	0.42787	0.21507	0.54995	0.45956	0.25145	0.41667
0	0.36919	0.29963	0.63952	0.36734	0.3815	0.33333
0	0.51589	0.31985	0.45223	0.5255	0.12139	0.41667
0	0.31296	0.26471	0.57872	0.44925	0.27457	0.30556
0	0.49633	0.3364	0.53257	0.47965	0.26012	0.41667
0	0.64303	0.27022	0.56732	0.43019	0.22543	0.52778
0	0.57213	0.22426	0.52063	0.45389	0.19364	0.47222
0	0.33496	0.27022	0.46091	0.50489	0.07225	0.25
0	0.59413	0.24816	0.5456	0.46522	0.15607	0.41667
0	0.52323	0.2261	0.55375	0.43328	0.18208	0.41667
0	0.52323	0.44669	0.47937	0.48068	0.19075	0.5
0	0.43032	0.22059	0.57383	0.44152	0.27746	0.33333
0	0.55257	0.24632	0.54777	0.49768	0.34682	0.44444
0	0.34963	0.38235	0.51792	0.47553	0.27746	0.33333
0	0.51589	0.32353	0.57926	0.46728	0.25145	0.52778
0	0.57702	0.22059	0.49674	0.45853	0.17919	0.5
0	0.4621	0.22794	0.49783	0.47295	0.18497	0.44444
0	0.49144	0.26471	0.46417	0.47707	0.1763	0.41667
0	0.54523	0.28676	0.54343	0.46986	0.28902	0.47222
0	0.46455	0.25919	0.52552	0.44616	0.24566	0.33333
0	0.46944	0.21324	0.54723	0.44204	0.24566	0.44444
0	0.44743	0.21875	0.62541	0.42092	0.3237	0.38889
0	0.35208	0.28309	0.63192	0.4508	0.26012	0.25
0	0.31296	0.23529	0.43974	0.49974	0.20809	0.13889
0	0.46455	0.32353	0.63735	0.43122	0.30058	0.41667
0	0.53056	0.2261	0.48969	0.47141	0.20231	0.47222
0	0.38875	0.25184	0.40879	0.5322	0.1763	0.33333
0	0.5868	0.32904	0.52009	0.45544	0.20809	0.58333
0	0.46699	0.29963	0.51466	0.5018	0.16474	0.41667
0	0.5379	0.2261	0.5076	0.46419	0.16185	0.38889
0	0.52323	0.3989	0.519	0.45337	0.26012	0.41667
0	0.45477	0.24449	0.65309	0.39001	0.36416	0.36111
0	0.40831	0.25735	0.56786	0.4848	0.34393	0.30556
0	0.40831	0.34926	0.60423	0.43895	0.40173	0.38889
0	0.42787	0.27022	0.41097	0.53375	0.22832	0.41667
0	0.46699	0.32721	0.5152	0.5188	0.17052	0.44444
0	0.5868	0.20772	0.46091	0.4915	0.13295	0.52778
0	0.2665	0.21324	0.56623	0.44616	0.32948	0.16667
0	0.53301	0.26838	0.59501	0.38485	0.1763	0.44444
0	0.35208	0.24265	0.64061	0.40237	0.23121	0.27778
0	0.42543	0.26654	0.65255	0.38949	0.33526	0.38889
0	0.46699	0.19485	0.62866	0.38382	0.32948	0.44444
0	0.23716	0.24632	0.53637	0.52962	0.16763	0.11111
0	0.22249	0.25184	0.55646	0.4575	0.36705	0.16667
0	0.2665	0.20221	0.59229	0.45234	0.33526	0.22222
0	0.4132	0.18199	0.53094	0.44719	0.28902	0.36111
0	0.34963	0.20404	0.41857	0.49047	0.19075	0.30556
0	0.15403	0.3125	0.5342	0.51417	0.20809	0.16667
0	0.35452	0.22978	0.51303	0.46316	0.23699	0.27778
0	0.56968	0.28309	0.58523	0.4338	0.15607	0.47222
0	0.46455	0.2739	0.53637	0.44565	0.28324	0.38889
0	0.489	0.20588	0.62215	0.44307	0.31503	0.33333
0	0.31051	0.26103	0.5608	0.44719	0.34104	0.25
0	0.36675	0.2739	0.52877	0.47244	0.24566	0.30556
0	0.511	0.22978	0.53637	0.40443	0.15029	0.44444
0	0.51345	0.28676	0.57709	0.4204	0.21387	0.47222
0	0.55746	0.28309	0.58089	0.44565	0.30925	0.55556
0	0.44988	0.22426	0.52443	0.45389	0.25434	0.38889
0	0.51345	0.23529	0.53366	0.4374	0.18208	0.41667
0	0.55012	0.36213	0.47774	0.46986	0.12139	0.41667
0	0.3643	0.18015	0.56135	0.47501	0.28035	0.22222
0	0.30318	0.27022	0.53094	0.51571	0.21965	0.25
0	0.41076	0.31985	0.50869	0.44719	0.23699	0.33333
0	0.45966	0.19118	0.63844	0.38228	0.3237	0.44444
0	0.47677	0.09007	0.56298	0.39052	0.2341	0.41667
0	0.52078	0.11765	0.62106	0.37713	0.31503	0.5
0	0.57702	0.33456	0.44571	0.48892	0.15029	0.52778
0	0.40342	0.23346	0.56515	0.4271	0.2052	0.36111
0	0.41809	0.25919	0.59609	0.45904	0.11272	0.41667
0	0.43521	0.27574	0.62921	0.39722	0.30058	0.5
0	0.39853	0.32353	0.5304	0.4678	0.21387	0.36111
0	0.37164	0.20956	0.52172	0.4781	0.2659	0.27778
0	0.36186	0.27574	0.52552	0.46625	0.2948	0.30556
0	0.28606	0.21324	0.55157	0.44874	0.3237	0.25
0	0.41565	0.22243	0.56949	0.41989	0.32948	0.41667
0	0.22738	0.15257	0.57709	0.43277	0.26012	0.19444
0	0.48411	0.29412	0.64332	0.3797	0.22254	0.47222
0	0.32029	0.23346	0.54615	0.46007	0.29769	0.33333
0	0.36919	0.25184	0.51629	0.47604	0.25723	0.36111
0	0.43765	0.2739	0.576	0.42092	0.34682	0.44444
0	0.34474	0.15809	0.58632	0.39001	0.27168	0.25
0	0.43521	0.31618	0.45657	0.57754	0.15029	0.33333
0	0.28117	0.29963	0.538	0.47707	0.31503	0.27778
0	0.58924	0.29963	0.54235	0.43483	0.23121	0.5
0	0.51589	0.22059	0.56406	0.44616	0.24855	0.41667
0	0.1467	0.16728	0.4848	0.48892	0.21676	0.19444
0	0.17359	0.22059	0.48371	0.49253	0.17341	0.16667
0	0.40831	0.22059	0.52117	0.47553	0.25723	0.33333
0	0.55746	0.27941	0.47991	0.47862	0.17341	0.5
0	0.27873	0.27574	0.48534	0.48789	0.18208	0.30556
0	0.45966	0.25368	0.58415	0.39876	0.36705	0.44444
0	0.45232	0.39338	0.50706	0.51623	0.12428	0.44444
0	0.31296	0.31985	0.58035	0.44822	0.32659	0.27778
0	0.49144	0.29044	0.51412	0.50541	0.28324	0.44444
0	0.43032	0.25919	0.55483	0.41267	0.28324	0.38889
0	0.45477	0.24449	0.48588	0.4745	0.19075	0.47222
0	0.37164	0.22978	0.54397	0.43895	0.25145	0.30556
0	0.37653	0.28676	0.5684	0.4508	0.22543	0.33333
0	0.36919	0.23897	0.63084	0.41164	0.22254	0.33333
0	0.37897	0.25919	0.51683	0.46986	0.25434	0.38889
0	0.38631	0.14706	0.56623	0.39722	0.27457	0.38889
0	0.42543	0.21324	0.55375	0.49459	0.19075	0.36111
0	0.38386	0.26654	0.49186	0.48274	0.22832	0.30556
0	0.54523	0.20037	0.54343	0.42246	0.26879	0.38889
0	0.39853	0.23713	0.49783	0.4982	0.20809	0.33333
0	0.19315	0.26838	0.49837	0.52859	0.26012	0.16667
0	0.33252	0.31066	0.61401	0.45131	0.33237	0.33333
0	0.42543	0.24632	0.58795	0.44462	0.3526	0.33333
0	0.43521	0.24816	0.55375	0.40958	0.28324	0.38889
0	0.41076	0.24449	0.62595	0.41422	0.26012	0.41667
0	0.14425	0.13603	0.42888	0.49923	0.14451	0.16667
0	0.5379	0.35662	0.46254	0.57548	0.13295	0.41667
0	0.25428	0.29228	0.51629	0.47604	0.35838	0.19444
0	0.47188	0.375	0.34093	0.57651	0.09538	0.47222
0	0.48655	0.25551	0.39522	0.55796	0.15318	0.33333
0	0.55257	0.37316	0.45223	0.5018	0.10983	0.58333
0	0.57702	0.34375	0.66504	0.37506	0.30058	0.52778
0	0.48166	0.38787	0.60206	0.44204	0.25723	0.44444
0	0.67726	0.36029	0.47177	0.48892	0.08382	0.61111
0	0.43765	0.25551	0.59555	0.40082	0.33815	0.36111
0	0.47188	0.28309	0.59446	0.43998	0.33815	0.44444
0	0.19071	0.23897	0.54289	0.46059	0.16763	0.11111
0	0.56235	0.26654	0.55972	0.39619	0.32081	0.5
0	0.32518	0.25368	0.62052	0.40185	0.33237	0.27778
0	0.49878	0.24816	0.5608	0.40134	0.26879	0.44444
0	0.08313	0.1875	0.4582	0.50799	0.16185	0.16667
0	0.35941	0.28125	0.58523	0.41783	0.33815	0.30556
0	0.47677	0.25184	0.58578	0.41113	0.27457	0.38889
0	0.4132	0.27941	0.53312	0.44874	0.19653	0.38889
0	0.44499	0.18015	0.66069	0.38228	0.30058	0.47222
0	0.37164	0.20772	0.62378	0.39928	0.27457	0.30556
0	0.36186	0.2886	0.41748	0.57445	0.1763	0.33333
0	0.48411	0.2114	0.46254	0.53529	0.21387	0.41667
0	0.36186	0.19301	0.50543	0.46522	0.25434	0.36111
0	0.25428	0.22426	0.51683	0.47398	0.30058	0.16667
0	0.18826	0.11397	0.47883	0.47707	0.26879	0.16667
0	0.31785	0.26287	0.48534	0.46986	0.32081	0.33333
0	0.44499	0.21691	0.54995	0.48016	0.24566	0.38889
0	0.43521	0.22794	0.61129	0.4101	0.32948	0.36111
0	0.34719	0.34191	0.52769	0.5018	0.2341	0.38889
0	0.41565	0.22243	0.5684	0.44771	0.27168	0.33333
0	0.44499	0.20221	0.56406	0.42607	0.33237	0.38889
0	0.43765	0.29779	0.49457	0.48635	0.16185	0.38889
0	0.38631	0.24265	0.54017	0.44152	0.28613	0.41667
0	0.43521	0.27206	0.59989	0.42092	0.3815	0.33333
0	0.39609	0.19669	0.48534	0.44822	0.23121	0.30556
0	0.37653	0.20037	0.48751	0.52293	0.29191	0.36111
0	0.23472	0.29596	0.53474	0.46574	0.17052	0.27778
0	0.25428	0.21691	0.51412	0.47244	0.15029	0.22222
0	0.34474	0.26287	0.54126	0.4575	0.26012	0.38889
0	0.43521	0.31066	0.39142	0.60484	0.10116	0.36111
0	0.30318	0.23162	0.3165	0.60793	0.17341	0.27778
0	0.37653	0.27757	0.53909	0.4812	0.2341	0.38889
0	0.47433	0.23162	0.53149	0.44513	0.33237	0.44444
0	0.1198	0.18015	0.4278	0.54147	0.15607	0.19444
0	0.47922	0.42279	0.45711	0.53065	0.08671	0.44444
0	0.53545	0.27757	0.55266	0.43998	0.34682	0.47222
0	0.37897	0.22978	0.62432	0.40082	0.34104	0.33333
0	0.23472	0.14706	0.51466	0.40804	0.24566	0.22222
0	0.22494	0.19669	0.55809	0.5018	0.25145	0.13889
0	0.28851	0.16176	0.40282	0.56414	0.12139	0.19444
0	0.5379	0.3364	0.52334	0.47707	0.12428	0.5
0	0.32274	0.21691	0.56515	0.44822	0.24566	0.33333
0	0.46944	0.27206	0.51031	0.47398	0.30636	0.47222
0	0.45966	0.18566	0.52389	0.46625	0.3237	0.36111
0	0.54768	0.48346	0.36374	0.56363	0.04046	0.52778
0	0.36919	0.25735	0.5874	0.47192	0.25434	0.33333
0	0.20538	0.24632	0.46471	0.52859	0.26879	0.25
0	0.33741	0.33088	0.48643	0.5255	0.18208	0.38889
0	0.27384	0.20772	0.56189	0.41422	0.23121	0.19444
0	0.32274	0.28493	0.42888	0.5322	0.10116	0.30556
0	0.55501	0.44853	0.51357	0.49201	0.10694	0.47222
0	0.28851	0.16544	0.45765	0.48532	0.2659	0.22222
0	0.49389	0.25184	0.47231	0.47759	0.27168	0.38889
0	0.47433	0.25919	0.43974	0.46986	0.18786	0.5
0	0.1956	0.15809	0.4316	0.5018	0.18208	0.19444
0	0.33496	0.21691	0.41965	0.52859	0.15029	0.33333
0	0.32029	0.26103	0.52172	0.4982	0.3815	0.25
0	0.44499	0.28125	0.54777	0.44359	0.29191	0.36111
0	0.42787	0.2739	0.60369	0.45904	0.31214	0.41667
0	0.46944	0.35478	0.60423	0.45183	0.30925	0.44444
0	0.56235	0.37868	0.44191	0.51262	0.07225	0.55556
0	0.48411	0.31434	0.49837	0.47656	0.17341	0.38889
0	0.1956	0.21324	0.47014	0.49098	0.2052	0.19444
0	0.28606	0.21324	0.54723	0.46625	0.2052	0.25
0	0.48411	0.35478	0.52986	0.48068	0.33815	0.55556
0	0.40831	0.29044	0.5228	0.48944	0.26301	0.30556
0	0.44743	0.25184	0.5456	0.41267	0.31503	0.36111
0	0.10513	0.19485	0.58415	0.47141	0.24277	0.11111
0	0.39609	0.25919	0.66124	0.35188	0.39595	0.33333
0	0.54523	0.2114	0.61075	0.36064	0.30347	0.44444
0	0.35452	0.25919	0.53583	0.47192	0.23988	0.27778
0	0.25183	0.29228	0.53094	0.44822	0.19364	0.22222
0	0.35697	0.23897	0.52606	0.40701	0.21098	0.27778
0	0.41809	0.27757	0.59392	0.42298	0.30636	0.38889
0	0.32518	0.27206	0.56569	0.48429	0.27168	0.33333
0	0.28851	0.22794	0.55483	0.41422	0.27746	0.25
0	0.27384	0.16912	0.63084	0.43483	0.30347	0.19444
0	0.40831	0.25368	0.58143	0.43277	0.3237	0.30556
0	0.51834	0.26471	0.46851	0.48068	0.04913	0.55556
0	0.37164	0.32169	0.59501	0.41216	0.21387	0.33333
0	0.41565	0.24449	0.63518	0.40031	0.34682	0.38889
0	0.50367	0.25919	0.5874	0.42916	0.18786	0.41667
0	0.50611	0.24081	0.61835	0.3931	0.24277	0.47222
0	0.47922	0.40993	0.50706	0.48738	0.16474	0.5
0	0.45477	0.25368	0.62106	0.39155	0.34971	0.38889
0	0.50122	0.18199	0.65147	0.34106	0.34682	0.44444
0	0.44499	0.23897	0.59175	0.39207	0.24855	0.38889
0	0.4621	0.19669	0.61129	0.39001	0.3237	0.38889
0	0.42298	0.32537	0.54723	0.42658	0.23988	0.36111
0	0.39364	0.24265	0.60206	0.39413	0.28613	0.38889
0	0.2445	0.29596	0.63464	0.40289	0.31792	0.27778
0	0.38386	0.2114	0.61401	0.4137	0.26012	0.36111
0	0.33741	0.29412	0.66341	0.42504	0.36127	0.27778
0	0.44743	0.30515	0.61564	0.42504	0.30058	0.41667
0	0.46944	0.26103	0.68241	0.36631	0.35838	0.38889
0	0.46944	0.26103	0.68241	0.36631	0.35838	0.38889
0	0.59169	0.29044	0.5304	0.39619	0.33237	0.41667
0	0.49633	0.30331	0.64224	0.38176	0.35549	0.41667
0	0.43276	0.35846	0.51737	0.48841	0.23121	0.38889
0	0.54523	0.3511	0.51737	0.49871	0.13584	0.47222
0	0.51834	0.28676	0.49783	0.47707	0.15318	0.36111
0	0.30807	0.27206	0.55972	0.44462	0.15318	0.27778
0	0.37653	0.27941	0.60586	0.4611	0.36994	0.27778
0	0.53056	0.2886	0.59283	0.39413	0.45665	0.5
0	0.37897	0.20221	0.58958	0.44822	0.34682	0.30556
0	0.47677	0.26287	0.49566	0.45853	0.31792	0.47222
0	0.57213	0.42831	0.39359	0.51365	0.05202	0.61111
0	0.56968	0.48897	0.4316	0.53272	0.09249	0.58333
0	0.47677	0.36213	0.50271	0.52138	0.0896	0.47222
0	0.34474	0.27206	0.5266	0.47604	0.23699	0.27778
0	0.41565	0.2739	0.59175	0.41937	0.35838	0.38889
0	0.45721	0.31434	0.58252	0.50026	0.29191	0.38889
0	0.42787	0.35478	0.56732	0.51262	0.30347	0.30556
0	0.39853	0.34007	0.45494	0.53993	0.13295	0.38889
0	0.39853	0.34007	0.45494	0.53993	0.13295	0.38889
0	0.49144	0.19118	0.61292	0.38897	0.24277	0.44444
0	0.44499	0.19853	0.61021	0.39876	0.26012	0.41667
0	0.17604	0.23713	0.59555	0.4338	0.22254	0.16667
0	0.44743	0.24081	0.519	0.48223	0.2341	0.38889
0	0.49389	0.37684	0.50163	0.52705	0.18497	0.38889
0	0.36186	0.19485	0.58578	0.39773	0.28324	0.27778
0	0.43032	0.26654	0.54072	0.46574	0.29769	0.27778
0	0.30318	0.26471	0.60803	0.44256	0.33815	0.22222
0	0.32274	0.27022	0.55537	0.49871	0.23699	0.22222
0	0.33741	0.17463	0.52172	0.48223	0.39017	0.27778
0	0.39364	0.22426	0.57763	0.39928	0.35838	0.27778
0	0.56724	0.19669	0.50489	0.43174	0.22832	0.41667
0	0.45721	0.18934	0.63301	0.34621	0.36416	0.38889
0	0.4621	0.29412	0.56026	0.4034	0.38439	0.38889
0	0.47188	0.23162	0.61618	0.34003	0.43064	0.38889
0	0.46944	0.19669	0.62975	0.35085	0.38728	0.5
0	0.35941	0.23346	0.56949	0.44565	0.42197	0.25
0	0.44254	0.30147	0.61455	0.4745	0.35549	0.27778
0	0.29829	0.21324	0.52823	0.43483	0.32081	0.19444
0	0.40831	0.29228	0.52552	0.43174	0.35549	0.36111
0	0.47677	0.34375	0.4848	0.4848	0.30058	0.44444
0	0.52567	0.23713	0.49349	0.39773	0.32659	0.47222
0	0.47677	0.22978	0.52497	0.41319	0.32081	0.41667
0	0.51834	0.54596	0.43594	0.46986	0.29769	0.58333
0	0.43521	0.24816	0.54777	0.45647	0.31503	0.38889
0	0.46944	0.23529	0.54289	0.44719	0.3237	0.38889
0	0.52812	0.41912	0.55755	0.41886	0.40173	0.52778
0	0.41809	0.27941	0.53963	0.46265	0.28324	0.33333
0	0.30318	0.27757	0.53963	0.45234	0.36994	0.27778
0	0.38631	0.31618	0.5	0.49253	0.33526	0.38889
0	0.39364	0.25919	0.52063	0.47192	0.33237	0.36111
0	0.52323	0.24265	0.49674	0.45286	0.30347	0.41667
0	0.33741	0.26838	0.47557	0.46522	0.3526	0.30556
0	0.45232	0.35846	0.47123	0.51932	0.16763	0.41667
0	0.41565	0.26471	0.50163	0.46316	0.32081	0.33333
0	0.35208	0.24449	0.4772	0.45904	0.32081	0.38889
0	0.37653	0.28676	0.56406	0.40598	0.39595	0.38889
0	0.34719	0.21875	0.52552	0.45286	0.28613	0.25
0	0.47433	0.23713	0.4962	0.42813	0.31792	0.41667
0	0.53301	0.29412	0.49566	0.42349	0.30058	0.47222
0	0.55012	0.24632	0.47068	0.46574	0.22832	0.5
0	0.40342	0.2114	0.52389	0.48068	0.28035	0.36111
0	0.40587	0.23162	0.47014	0.46986	0.28613	0.27778
0	0.44743	0.27574	0.50434	0.47244	0.37283	0.47222
0	0.3912	0.20037	0.5038	0.45028	0.3237	0.38889
0	0.41565	0.25735	0.53529	0.42246	0.43064	0.38889
0	0.41809	0.23529	0.51249	0.46368	0.36127	0.33333
0	0.54034	0.36397	0.58306	0.41164	0.32948	0.5
0	0.50367	0.31066	0.557	0.42143	0.32659	0.41667
0	0.49144	0.30147	0.45928	0.54353	0.24855	0.38889
0	0.49144	0.2739	0.56026	0.37352	0.41908	0.5
0	0.46699	0.27757	0.5038	0.41834	0.34393	0.38889
0	0.43765	0.27022	0.47394	0.43277	0.25145	0.38889
0	0.34963	0.20037	0.52063	0.47244	0.29769	0.25
0	0.48655	0.26838	0.47611	0.47347	0.22543	0.38889
0	0.51834	0.23346	0.50054	0.3864	0.30347	0.38889
0	0.57457	0.13235	0.56026	0.41473	0.3237	0.44444
0	0.49633	0.40257	0.37622	0.53529	0.1763	0.38889
0	0.51589	0.27757	0.4772	0.46162	0.26301	0.41667
0	0.54523	0.34743	0.58143	0.37403	0.39306	0.41667
0	0.511	0.27022	0.56352	0.46986	0.3237	0.33333
0	0.47677	0.27022	0.49403	0.43328	0.2659	0.47222
0	0.511	0.18934	0.57329	0.38434	0.32948	0.41667
0	0.57946	0.27757	0.52932	0.40185	0.3237	0.55556
0	0.511	0.18566	0.50706	0.46265	0.25434	0.41667
0	0.50611	0.19485	0.54289	0.37816	0.24566	0.41667
0	0.47922	0.31434	0.5114	0.41473	0.26879	0.41667
0	0.5379	0.26654	0.52823	0.46368	0.30925	0.44444
0	0.47922	0.19485	0.45603	0.49665	0.27457	0.38889
0	0.28851	0.18934	0.54886	0.43328	0.28035	0.27778
0	0.6088	0.41544	0.48263	0.42401	0.24566	0.52778
0	0.44499	0.35478	0.5456	0.47913	0.31503	0.30556
0	0.42054	0.28493	0.45277	0.48016	0.33526	0.36111
0	0.40831	0.25184	0.46308	0.4101	0.2659	0.41667
0	0.4621	0.24265	0.49077	0.4338	0.30347	0.38889
0	0.47188	0.31801	0.50923	0.41886	0.42775	0.38889
0	0.45966	0.30147	0.53474	0.4101	0.2948	0.38889
0	0.50122	0.25551	0.63029	0.35137	0.29191	0.38889
0	0.49144	0.22794	0.50163	0.41422	0.29769	0.36111
0	0.4621	0.28493	0.54506	0.41783	0.30347	0.38889
0	0.61858	0.34743	0.4962	0.44822	0.36994	0.5
0	0.47922	0.40074	0.47231	0.53787	0.28902	0.36111
0	0.45477	0.31434	0.51466	0.45492	0.42197	0.41667
0	0.47188	0.27757	0.50706	0.48429	0.28035	0.41667
0	0.46699	0.22059	0.53149	0.42452	0.31214	0.38889
0	0.51345	0.26103	0.53149	0.44822	0.30925	0.44444
0	0.44499	0.35846	0.59555	0.38794	0.4104	0.44444
0	0.38142	0.34007	0.4696	0.46471	0.32081	0.33333
0	0.4621	0.34559	0.52877	0.44925	0.32948	0.38889
0	0.41076	0.25368	0.55375	0.45698	0.26012	0.41667
0	0.50122	0.24449	0.53746	0.43843	0.28324	0.47222
0	0.37164	0.2739	0.538	0.48068	0.33526	0.25
0	0.50122	0.36397	0.47991	0.45544	0.27168	0.47222
0	0.42298	0.33456	0.50814	0.46986	0.36127	0.36111
0	0.4401	0.29044	0.45223	0.52602	0.28902	0.30556
0	0.45721	0.34007	0.52606	0.44462	0.36127	0.38889
0	0.36919	0.32904	0.58089	0.45234	0.38728	0.25
0	0.4132	0.23897	0.56678	0.46986	0.35838	0.30556
0	0.43032	0.29412	0.47448	0.48944	0.3237	0.36111
0	0.37897	0.27757	0.47448	0.47192	0.36416	0.38889
0	0.59902	0.35294	0.48154	0.45234	0.23121	0.58333
0	0.43032	0.21324	0.56406	0.46574	0.30347	0.27778
0	0.43276	0.31434	0.47557	0.52035	0.3237	0.47222
0	0.39364	0.22794	0.49457	0.47604	0.2948	0.30556
0	0.42787	0.23897	0.5304	0.4168	0.35549	0.33333
0	0.40342	0.21691	0.51737	0.44822	0.3815	0.41667
0	0.45477	0.23713	0.55103	0.38073	0.33815	0.38889
0	0.38386	0.35846	0.4962	0.46213	0.26879	0.36111
0	0.40587	0.30147	0.52172	0.47347	0.33526	0.38889
0	0.38142	0.36029	0.4886	0.48892	0.23988	0.41667
0	0.3643	0.17279	0.5494	0.44977	0.26012	0.27778
0	0.2934	0.28493	0.54126	0.4781	0.28324	0.25
0	0.36186	0.36397	0.4544	0.54508	0.36127	0.38889
0	0.42298	0.27206	0.52823	0.44822	0.31792	0.36111
0	0.52078	0.22426	0.48263	0.46007	0.29191	0.38889
0	0.56968	0.33824	0.51737	0.44101	0.28613	0.47222
0	0.56235	0.27206	0.55429	0.40443	0.31503	0.55556
0	0.47433	0.19853	0.54669	0.41267	0.34393	0.41667
0	0.51589	0.23713	0.53909	0.39258	0.25434	0.44444
0	0.46944	0.375	0.48643	0.46677	0.29191	0.47222
0	0.45721	0.28309	0.48046	0.46625	0.29769	0.41667
0	0.34719	0.33824	0.45168	0.58784	0.28902	0.27778
0	0.36186	0.32353	0.48371	0.49923	0.28035	0.36111
0	0.41076	0.29596	0.49186	0.50747	0.2659	0.41667
0	0.49633	0.19301	0.49186	0.50129	0.22832	0.33333
0	0.47677	0.30699	0.49511	0.45544	0.40462	0.41667
0	0.43276	0.44853	0.462	0.51623	0.37283	0.41667
0	0.44743	0.55699	0.45711	0.54972	0.25145	0.41667
0	0.41809	0.38235	0.51466	0.49614	0.29769	0.41667
0	0.41809	0.30147	0.60586	0.43071	0.39017	0.47222
0	0.31051	0.36765	0.43051	0.51365	0.34393	0.30556
0	0.43032	0.28676	0.5266	0.51108	0.27457	0.27778
0	0.37653	0.3364	0.4924	0.44204	0.31503	0.36111
0	0.34963	0.29412	0.52063	0.4508	0.36994	0.36111
0	0.28606	0.28676	0.52877	0.41834	0.30058	0.25
0	0.42298	0.28309	0.55809	0.41628	0.34104	0.33333
0	0.511	0.3125	0.57709	0.36476	0.3237	0.5
0	0.41809	0.32353	0.49674	0.50696	0.24566	0.33333
0	0.42787	0.29779	0.44028	0.51211	0.20231	0.36111
0	0.43032	0.3125	0.5228	0.43225	0.26301	0.36111
0	0.511	0.29228	0.58903	0.41937	0.32659	0.47222
0	0.45477	0.26471	0.54506	0.44359	0.31503	0.41667
0	0.39609	0.21875	0.50434	0.47604	0.33237	0.33333
0	0.36186	0.23897	0.52009	0.46574	0.32659	0.33333
0	0.40587	0.25735	0.50109	0.46574	0.26879	0.33333
0	0.54523	0.23346	0.47557	0.44874	0.18497	0.41667
0	0.43276	0.25551	0.54669	0.40598	0.3237	0.41667
0	0.42298	0.25	0.5038	0.45956	0.23988	0.33333
0	0.42298	0.38419	0.48426	0.49304	0.19364	0.41667
0	0.43032	0.21507	0.58306	0.41577	0.28035	0.44444
0	0.47922	0.29044	0.47611	0.50283	0.27168	0.38889
0	0.50856	0.28125	0.54289	0.4544	0.25723	0.33333
0	0.43276	0.32169	0.4582	0.48326	0.30636	0.41667
0	0.50122	0.20772	0.45874	0.50902	0.23121	0.41667
0	0.54034	0.26654	0.43702	0.47759	0.1763	0.44444
0	0.54768	0.19118	0.52009	0.40855	0.21965	0.38889
0	0.34474	0.28493	0.49946	0.4745	0.26012	0.33333
0	0.48411	0.33824	0.46526	0.5729	0.15318	0.44444
0	0.54034	0.38235	0.52606	0.45698	0.26301	0.5
0	0.44499	0.22978	0.55646	0.41577	0.29191	0.41667
0	0.58191	0.23897	0.46906	0.44462	0.27168	0.5
0	0.27628	0.28493	0.53909	0.49923	0.3237	0.25
0	0.38875	0.24081	0.5456	0.4374	0.22254	0.33333
0	0.45966	0.24632	0.46417	0.42865	0.2948	0.38889
0	0.42543	0.22426	0.58198	0.40649	0.34104	0.36111
0	0.4401	0.22243	0.54126	0.40392	0.28324	0.36111
0	0.59902	0.3125	0.61672	0.35652	0.26012	0.52778
0	0.51345	0.30515	0.5722	0.47913	0.20809	0.44444
0	0.45232	0.34559	0.60803	0.46162	0.28613	0.33333
0	0.48411	0.22794	0.54723	0.41783	0.27457	0.47222
0	0.46944	0.25735	0.46471	0.51777	0.32659	0.41667
0	0.45232	0.25	0.56786	0.46728	0.46243	0.38889
0	0.44743	0.37132	0.52986	0.44513	0.34104	0.38889
0	0.53056	0.25184	0.47666	0.42143	0.26879	0.44444
0	0.60391	0.30147	0.40499	0.51468	0.15896	0.47222
0	0.61858	0.30515	0.48969	0.46162	0.25723	0.5
0	0.55257	0.33456	0.47937	0.46059	0.25723	0.44444
0	0.50856	0.28309	0.55592	0.42504	0.26301	0.38889
0	0.37408	0.34007	0.52443	0.49717	0.36127	0.38889
0	0.50611	0.29963	0.54777	0.4508	0.23699	0.5
0	0.42298	0.40993	0.4164	0.55744	0.20809	0.33333
0	0.43765	0.2739	0.52877	0.45904	0.28324	0.33333
0	0.42298	0.2261	0.49837	0.43946	0.28324	0.30556
0	0.51345	0.22059	0.54452	0.41628	0.27457	0.41667
0	0.50122	0.2114	0.4658	0.46419	0.22254	0.38889
0	0.44988	0.31618	0.5608	0.41525	0.41908	0.44444
0	0.56235	0.30147	0.5266	0.40804	0.25723	0.47222
0	0.40831	0.27574	0.43974	0.51571	0.2659	0.41667
0	0.44743	0.33272	0.53149	0.50644	0.23988	0.36111
0	0.46944	0.22059	0.49077	0.47913	0.25723	0.47222
0	0.45966	0.36581	0.424	0.48635	0.16474	0.38889
0	0.35697	0.29596	0.56298	0.4781	0.30636	0.36111
0	0.37164	0.34926	0.51629	0.42555	0.34104	0.33333
0	0.42298	0.26471	0.59663	0.39155	0.41908	0.33333
0	0.4621	0.30882	0.56732	0.43483	0.28613	0.38889
0	0.46455	0.34559	0.58469	0.39979	0.39595	0.41667
0	0.50122	0.25368	0.58958	0.38125	0.25145	0.47222
0	0.48166	0.28676	0.5874	0.41422	0.36416	0.33333
0	0.39853	0.25551	0.51737	0.43895	0.33815	0.36111
0	0.43276	0.3125	0.58578	0.40237	0.2948	0.38889
0	0.38386	0.22794	0.50489	0.4781	0.25145	0.30556
0	0.44254	0.26654	0.62106	0.41731	0.33815	0.36111
0	0.52323	0.31618	0.53855	0.44668	0.22832	0.47222
0	0.30073	0.11213	0.57546	0.45234	0.30347	0.19444
0	0.41565	0.18566	0.59881	0.35497	0.32948	0.38889
0	0.48655	0.25919	0.5038	0.45389	0.21965	0.38889
0	0.59413	0.26838	0.5608	0.37352	0.21965	0.52778
0	0.44254	0.22794	0.65038	0.36476	0.40751	0.38889
0	0.45721	0.43566	0.56352	0.43689	0.30058	0.44444
0	0.45721	0.25551	0.61183	0.38073	0.28035	0.44444
0	0.42787	0.24449	0.51737	0.46832	0.28613	0.36111
0	0.50856	0.20956	0.70521	0.34724	0.3815	0.30556
0	0.32029	0.14706	0.64169	0.3493	0.27457	0.19444
0	0.47922	0.21875	0.58198	0.35497	0.1763	0.38889
0	0.46699	0.26654	0.67047	0.37403	0.33815	0.41667
0	0.49878	0.22243	0.55429	0.42298	0.19075	0.41667
0	0.54768	0.30331	0.56623	0.39619	0.16763	0.41667
0	0.47188	0.16544	0.62378	0.36528	0.3237	0.38889
0	0.49389	0.27574	0.55049	0.45492	0.20809	0.47222
0	0.51834	0.23162	0.63789	0.33642	0.24855	0.47222
0	0.39853	0.31618	0.56243	0.46316	0.30925	0.27778
0	0.48166	0.10662	0.57166	0.35549	0.25145	0.41667
0	0.511	0.17279	0.62758	0.38588	0.30058	0.33333
0	0.28851	0.22978	0.56406	0.42452	0.36994	0.27778
0	0.44254	0.26471	0.55375	0.40237	0.28613	0.44444
0	0.31785	0.1489	0.61998	0.39928	0.30636	0.36111
0	0.64059	0.25919	0.52932	0.38125	0.17341	0.5
0	0.42543	0.30515	0.45494	0.43792	0.21098	0.33333
0	0.41076	0.36029	0.45603	0.44101	0.14451	0.33333
0	0.32029	0.27941	0.48914	0.41731	0.21387	0.25
0	0.44743	0.27941	0.4848	0.49768	0.21676	0.36111
0	0.41565	0.23897	0.45168	0.52138	0.3526	0.33333
0	0.46455	0.25184	0.64387	0.41731	0.38728	0.27778
0	0.41076	0.28125	0.53257	0.40134	0.30347	0.30556
0	0.47922	0.15809	0.61455	0.37558	0.45087	0.41667
0	0.42543	0.18934	0.5608	0.38588	0.35838	0.33333
0	0.40098	0.22059	0.49566	0.42916	0.30925	0.30556
0	0.46699	0.11397	0.45874	0.41216	0.23988	0.25
0	0.48655	0.2261	0.62324	0.33076	0.34104	0.47222
0	0.52812	0.2261	0.63572	0.35446	0.29769	0.38889
0	0.33007	0.24265	0.60098	0.36837	0.19653	0.33333
0	0.50856	0.27206	0.59826	0.40031	0.35549	0.44444
0	0.4132	0.31985	0.43811	0.50747	0.31503	0.38889
0	0.35208	0.2886	0.51357	0.44049	0.3815	0.36111
0	0.50611	0.28309	0.51357	0.41834	0.34682	0.41667
0	0.41809	0.25551	0.51031	0.4137	0.42197	0.36111
0	0.45721	0.38051	0.44408	0.52911	0.30636	0.47222
0	0.45721	0.30515	0.51303	0.43946	0.40751	0.44444
0	0.48655	0.33272	0.49729	0.51108	0.25434	0.5
0	0.49144	0.17647	0.55266	0.41834	0.28902	0.41667
0	0.46455	0.30515	0.61129	0.43792	0.3815	0.38889
0	0.49389	0.18015	0.54995	0.43534	0.33237	0.33333
0	0.5868	0.19118	0.49783	0.41989	0.25434	0.41667
0	0.42787	0.30515	0.49891	0.47295	0.31214	0.38889
0	0.57457	0.19301	0.5418	0.39825	0.30925	0.44444
0	0.60147	0.29779	0.50869	0.4204	0.35838	0.47222
0	0.60636	0.24081	0.55646	0.38537	0.32659	0.44444
0	0.47188	0.29963	0.52497	0.46265	0.27746	0.38889
0	0.47188	0.22059	0.49837	0.47347	0.33526	0.38889
0	0.58924	0.16728	0.49457	0.40443	0.22543	0.5
0	0.56235	0.25	0.5418	0.46316	0.31792	0.33333
0	0.56724	0.23162	0.56895	0.38022	0.30058	0.44444
0	0.54279	0.30147	0.52226	0.46316	0.27746	0.38889
0	0.57457	0.27206	0.47666	0.43071	0.25434	0.44444
0	0.53301	0.34191	0.52226	0.41628	0.19364	0.47222
0	0.52812	0.31066	0.56732	0.40598	0.2948	0.52778
0	0.64548	0.13971	0.55755	0.34673	0.2052	0.44444
0	0.46944	0.28676	0.57058	0.42246	0.29769	0.41667
0	0.48166	0.33088	0.48371	0.48789	0.24855	0.44444
0	0.47188	0.20037	0.53583	0.41525	0.25723	0.33333
0	0.40587	0.21875	0.62758	0.46574	0.34971	0.27778
0	0.48411	0.37132	0.47503	0.45286	0.2659	0.47222
0	0.43276	0.32353	0.61781	0.40752	0.34104	0.41667
0	0.28362	0.19118	0.4696	0.47501	0.23988	0.22222
0	0.61369	0.17096	0.48697	0.40752	0.21676	0.44444
0	0.52812	0.26654	0.55103	0.39413	0.33237	0.41667
0	0.56235	0.27757	0.56623	0.4441	0.24855	0.44444
0	0.42054	0.22794	0.52497	0.4441	0.25145	0.38889
0	0.46699	0.26838	0.55103	0.42452	0.30925	0.41667
0	0.60391	0.28125	0.51574	0.52859	0.28613	0.36111
0	0.56724	0.3511	0.50597	0.44565	0.19942	0.47222
0	0.43276	0.35294	0.52226	0.4575	0.26301	0.38889
0	0.52323	0.24081	0.53149	0.39104	0.29769	0.47222
0	0.42543	0.27941	0.57438	0.45183	0.34971	0.38889
0	0.56724	0.31066	0.49837	0.4374	0.25723	0.44444
0	0.51345	0.31434	0.59826	0.37352	0.35549	0.55556
0	0.55257	0.25735	0.45657	0.43689	0.27457	0.38889
0	0.42543	0.29963	0.5	0.46316	0.32659	0.36111
0	0.57702	0.26471	0.56189	0.41989	0.2659	0.52778
0	0.52567	0.35478	0.46851	0.49923	0.21965	0.52778
0	0.30562	0.28125	0.53909	0.47553	0.27457	0.25
0	0.36186	0.27757	0.57872	0.40804	0.40751	0.41667
0	0.3643	0.20404	0.52877	0.46728	0.36416	0.27778
0	0.50367	0.24816	0.59012	0.42865	0.29769	0.47222
0	0.51345	0.24632	0.5608	0.42658	0.30058	0.41667
0	0.50856	0.27022	0.55429	0.41731	0.31214	0.41667
0	0.36186	0.28493	0.52932	0.46677	0.22832	0.30556
0	0.36919	0.25	0.56732	0.45234	0.30925	0.30556
0	0.47433	0.24265	0.62106	0.38434	0.33526	0.47222
0	0.44743	0.23346	0.48317	0.46471	0.19653	0.33333
0	0.28117	0.24081	0.64115	0.47192	0.29191	0.16667
0	0.33985	0.16176	0.66287	0.42246	0.3526	0.19444
0	0.56479	0.3989	0.49023	0.46832	0.2341	0.44444
0	0.44988	0.11397	0.56515	0.40134	0.3237	0.30556
0	0.54768	0.21324	0.4886	0.43998	0.27457	0.47222
0	0.51834	0.15809	0.56569	0.37094	0.34682	0.47222
0	0.57213	0.19669	0.53366	0.41731	0.31503	0.52778
0	0.60147	0.1875	0.49294	0.42246	0.26879	0.44444
0	0.5379	0.31434	0.48643	0.45234	0.28613	0.41667
0	0.44499	0.16176	0.557	0.42401	0.31214	0.38889
0	0.40098	0.30882	0.61238	0.48841	0.30925	0.33333
0	0.43032	0.29596	0.5646	0.50953	0.21965	0.41667
0	0.53056	0.25184	0.59609	0.43534	0.31214	0.44444
0	0.49878	0.28493	0.58686	0.45389	0.21098	0.44444
0	0.32274	0.2114	0.56949	0.44513	0.30636	0.33333
0	0.45966	0.36765	0.53474	0.43431	0.29191	0.38889
0	0.50611	0.33272	0.52389	0.44101	0.36994	0.44444
0	0.55746	0.25919	0.538	0.42246	0.28613	0.41667
0	0.41565	0.30699	0.48534	0.51984	0.27746	0.41667
0	0.51589	0.34191	0.50217	0.51984	0.2341	0.38889
0	0.44499	0.34743	0.47231	0.53272	0.2341	0.38889
0	0.53301	0.29963	0.61075	0.40237	0.28902	0.44444
0	0.511	0.26471	0.59663	0.43225	0.2659	0.47222
0	0.54034	0.31985	0.59555	0.44513	0.26301	0.55556
0	0.55012	0.25735	0.63952	0.38537	0.29191	0.5
0	0.55746	0.32169	0.5874	0.41731	0.32948	0.5
0	0.66259	0.26654	0.57709	0.41525	0.25145	0.58333
0	0.57702	0.22978	0.50977	0.4544	0.27457	0.5
0	0.52812	0.26103	0.44951	0.48429	0.18786	0.44444
0	0.42054	0.33272	0.55429	0.47604	0.34971	0.33333
0	0.64059	0.29044	0.53963	0.45234	0.19942	0.5
0	0.44254	0.34926	0.4392	0.52035	0.28324	0.47222
0	0.57702	0.28676	0.58035	0.39876	0.20231	0.47222
0	0.65526	0.21691	0.53692	0.40082	0.20231	0.52778
0	0.56235	0.27941	0.66287	0.34518	0.25723	0.5
0	0.57213	0.21875	0.51194	0.43328	0.15607	0.5
0	0.511	0.29412	0.49783	0.47244	0.15896	0.44444
0	0.5379	0.2114	0.51629	0.41989	0.16474	0.41667
0	0.52323	0.34191	0.53909	0.44513	0.32081	0.52778
0	0.34474	0.26654	0.45385	0.55332	0.16763	0.30556
0	0.4621	0.36029	0.37296	0.6203	0.1763	0.41667
0	0.48655	0.39338	0.46743	0.51365	0.23699	0.52778
0	0.47677	0.32721	0.43974	0.53941	0.19942	0.38889
0	0.44743	0.38971	0.49891	0.51571	0.36127	0.44444
0	0.61614	0.25735	0.49131	0.47141	0.25434	0.52778
0	0.489	0.26103	0.50163	0.48944	0.2948	0.41667
0	0.45477	0.37684	0.52172	0.46728	0.29191	0.41667
0	0.5599	0.27941	0.44083	0.49562	0.17052	0.47222
0	0.47677	0.32904	0.49783	0.48171	0.31792	0.5
0	0.46455	0.33824	0.41857	0.51211	0.16763	0.36111
0	0.46944	0.29779	0.49403	0.50541	0.28324	0.36111
0	0.39364	0.31066	0.47828	0.51674	0.22543	0.38889
0	0.44743	0.31985	0.5228	0.49614	0.30636	0.41667
0	0.49389	0.37132	0.47123	0.53684	0.15896	0.44444
0	0.58924	0.37132	0.462	0.50696	0.25434	0.44444
0	0.47922	0.26838	0.47123	0.45801	0.27168	0.41667
0	0.48411	0.36029	0.4886	0.51056	0.25723	0.47222
0	0.40098	0.28493	0.47937	0.4678	0.22543	0.36111
0	0.57213	0.19853	0.56135	0.40907	0.22543	0.5
0	0.489	0.25551	0.43594	0.48892	0.21098	0.36111
0	0.35941	0.3511	0.51249	0.50799	0.34682	0.36111
0	0.45477	0.25	0.51846	0.42401	0.43642	0.44444
0	0.50856	0.3511	0.45168	0.52241	0.26879	0.5
0	0.35208	0.32537	0.48751	0.50489	0.27168	0.36111
0	0.46699	0.20588	0.47448	0.47089	0.19653	0.47222
0	0.43032	0.25	0.54072	0.45028	0.2948	0.38889
0	0.54523	0.44853	0.41531	0.55178	0.11561	0.47222
0	0.4132	0.29044	0.50977	0.45801	0.29191	0.38889
0	0.62592	0.29963	0.53855	0.40855	0.22832	0.5
0	0.56479	0.16912	0.50489	0.47965	0.23699	0.5
0	0.41809	0.43199	0.47828	0.55744	0.31792	0.38889
0	0.40831	0.37316	0.61564	0.44101	0.4104	0.47222
0	0.55012	0.27574	0.57112	0.41113	0.2948	0.52778
0	0.55257	0.28125	0.60098	0.41628	0.30347	0.5
0	0.51345	0.25368	0.54343	0.43895	0.31503	0.41667
0	0.49878	0.33456	0.57492	0.42658	0.36416	0.41667
0	0.60147	0.46691	0.5	0.45389	0.18208	0.55556
0	0.49633	0.34559	0.51846	0.45647	0.31503	0.41667
0	0.44254	0.30515	0.53149	0.46007	0.36416	0.47222
0	0.40831	0.33272	0.49294	0.50438	0.2948	0.33333
0	0.54279	0.31985	0.44083	0.52138	0.1763	0.52778
0	0.42054	0.24449	0.52117	0.43895	0.30925	0.38889
0	0.52323	0.25184	0.53257	0.47192	0.22832	0.41667
0	0.48166	0.28125	0.55429	0.46677	0.23988	0.41667
0	0.5599	0.22978	0.52986	0.45028	0.25723	0.52778
0	0.44743	0.23162	0.51574	0.49047	0.32081	0.44444
0	0.54279	0.29228	0.56189	0.43586	0.22254	0.52778
0	0.53056	0.27022	0.48697	0.4544	0.26012	0.44444
0	0.48411	0.32904	0.56406	0.4034	0.3526	0.41667
0	0.50611	0.22426	0.50923	0.48789	0.23121	0.36111
0	0.46699	0.33088	0.55755	0.45853	0.25723	0.41667
0	0.40098	0.27757	0.50326	0.49614	0.20809	0.38889
0	0.55257	0.41544	0.52497	0.47862	0.2341	0.55556
0	0.58924	0.32169	0.51846	0.45286	0.21098	0.5
0	0.54523	0.24265	0.59229	0.39001	0.28902	0.44444
0	0.53545	0.27757	0.64224	0.31891	0.35838	0.55556
0	0.55501	0.35478	0.46851	0.48583	0.26012	0.5
0	0.48411	0.24816	0.56949	0.36888	0.34393	0.44444
0	0.46455	0.29596	0.54886	0.42968	0.34104	0.47222
0	0.54523	0.29228	0.4658	0.53581	0.2341	0.47222
0	0.43032	0.36581	0.49403	0.50747	0.27457	0.38889
0	0.48411	0.34191	0.44897	0.53272	0.21098	0.41667
0	0.45966	0.2886	0.48969	0.48429	0.25723	0.44444
0	0.4621	0.35294	0.46797	0.5152	0.22832	0.41667
0	0.56724	0.26471	0.47937	0.45801	0.2341	0.5
0	0.53056	0.31985	0.46363	0.45956	0.24566	0.47222
0	0.54768	0.32169	0.48046	0.44204	0.25145	0.47222
0	0.47433	0.29963	0.56732	0.37043	0.39017	0.47222
0	0.60636	0.24265	0.49674	0.41525	0.21965	0.55556
0	0.44743	0.4136	0.42182	0.56826	0.30925	0.38889
0	0.54279	0.34375	0.49023	0.50232	0.20809	0.44444
0	0.33252	0.28309	0.40608	0.55487	0.15607	0.33333
0	0.47433	0.42647	0.46743	0.52808	0.32948	0.44444
0	0.52323	0.46875	0.51031	0.48016	0.37283	0.52778
0	0.54768	0.29412	0.43811	0.49974	0.23699	0.52778
0	0.57946	0.27941	0.50597	0.44256	0.22543	0.5
0	0.54034	0.42463	0.37785	0.56157	0.19364	0.52778
0	0.50611	0.28676	0.59826	0.42452	0.41618	0.52778
0	0.43521	0.24816	0.46797	0.48841	0.24855	0.36111
0	0.45232	0.42831	0.44788	0.56929	0.20809	0.47222
0	0.49878	0.50184	0.36211	0.59815	0.16474	0.52778
0	0.43032	0.33824	0.53637	0.44152	0.41329	0.47222
0	0.46699	0.38787	0.52606	0.49304	0.34104	0.41667
0	0.57213	0.33456	0.5228	0.44822	0.27746	0.55556
0	0.60147	0.35662	0.54289	0.41783	0.31503	0.55556
0	0.59169	0.34191	0.49023	0.44565	0.25145	0.52778
0	0.4621	0.43015	0.51683	0.42401	0.34971	0.44444
0	0.55746	0.35846	0.45874	0.46368	0.24277	0.47222
0	0.45477	0.27574	0.519	0.44874	0.34682	0.44444
0	0.37164	0.34375	0.48643	0.56466	0.24855	0.33333
0	0.50367	0.33088	0.46091	0.49511	0.25145	0.44444
0	0.37897	0.35478	0.48371	0.44565	0.40462	0.36111
0	0.60391	0.43199	0.49783	0.46935	0.19653	0.61111
0	0.42054	0.34191	0.61183	0.41937	0.38439	0.38889
0	0.49633	0.34559	0.46417	0.49408	0.36994	0.38889
0	0.47677	0.49081	0.52117	0.48841	0.37572	0.47222
0	0.46944	0.3364	0.57275	0.43998	0.40751	0.44444
0	0.36675	0.28676	0.52932	0.45028	0.36416	0.33333
0	0.52323	0.33088	0.50869	0.44874	0.2948	0.44444
0	0.45721	0.34743	0.38328	0.5322	0.16185	0.36111
0	0.39853	0.49816	0.39522	0.58063	0.21676	0.44444
0	0.41076	0.38419	0.51086	0.49459	0.45376	0.41667
0	0.50856	0.33088	0.52877	0.4915	0.28902	0.52778
0	0.52567	0.34007	0.50434	0.44874	0.32948	0.47222
0	0.49144	0.41912	0.47394	0.4812	0.33526	0.47222
0	0.44988	0.47059	0.52552	0.50489	0.39595	0.38889
0	0.56479	0.41912	0.47774	0.48016	0.28324	0.44444
0	0.44743	0.49449	0.46743	0.5389	0.28035	0.5
0	0.47677	0.48713	0.4772	0.50489	0.30925	0.47222
0	0.489	0.33088	0.49457	0.44719	0.18208	0.44444
0	0.45966	0.38419	0.5836	0.40752	0.40751	0.44444
0	0.42787	0.38051	0.51574	0.47089	0.36127	0.44444
0	0.54279	0.45037	0.55592	0.43586	0.26301	0.55556
0	0.51589	0.30699	0.53583	0.4338	0.33815	0.47222
0	0.60147	0.50184	0.50923	0.45801	0.18208	0.58333
0	0.50856	0.34559	0.4772	0.42452	0.26012	0.44444
0	0.53301	0.29779	0.56515	0.41061	0.30347	0.47222
0	0.42054	0.31801	0.47611	0.45956	0.30058	0.36111
0	0.52567	0.29412	0.53746	0.41473	0.33526	0.41667
0	0.58435	0.35478	0.51846	0.43998	0.25723	0.44444
0	0.49389	0.36213	0.4962	0.50953	0.2659	0.44444
0	0.4132	0.33456	0.55809	0.44049	0.39595	0.38889
0	0.489	0.23346	0.49729	0.49408	0.34104	0.47222
0	0.62592	0.31985	0.49837	0.43637	0.22254	0.55556
0	0.59169	0.36581	0.47991	0.47347	0.23699	0.52778
0	0.56724	0.38235	0.47394	0.45801	0.29191	0.5
0	0.50122	0.35846	0.50489	0.47347	0.30347	0.41667
0	0.53301	0.38603	0.47448	0.46883	0.30058	0.52778
0	0.34963	0.29044	0.47014	0.42401	0.18497	0.30556
0	0.57702	0.3125	0.45114	0.50541	0.19942	0.5
0	0.50367	0.41728	0.50651	0.51262	0.31792	0.41667
0	0.42298	0.36765	0.53203	0.46162	0.40462	0.41667
0	0.54523	0.47426	0.5076	0.48068	0.32081	0.52778
0	0.4621	0.33272	0.57166	0.41319	0.44509	0.41667
0	0.57946	0.33456	0.47828	0.4915	0.29769	0.47222
0	0.39853	0.35478	0.48426	0.49511	0.25723	0.30556
0	0.60636	0.32904	0.4582	0.42401	0.28035	0.55556
0	0.44988	0.23346	0.49403	0.47501	0.25723	0.38889
0	0.61858	0.32169	0.49186	0.4271	0.19942	0.5
0	0.59658	0.3989	0.46363	0.50283	0.12717	0.55556
0	0.45966	0.39338	0.49403	0.50283	0.3526	0.41667
0	0.35941	0.39706	0.51249	0.4982	0.43642	0.36111
0	0.47922	0.6489	0.46906	0.55899	0.32659	0.58333
0	0.4401	0.39706	0.48371	0.49614	0.43353	0.44444
0	0.5379	0.33456	0.53149	0.45544	0.36416	0.5
0	0.59413	0.36397	0.50923	0.46162	0.36994	0.52778
0	0.52567	0.23346	0.519	0.33488	0.44509	0.41667
0	0.54279	0.3511	0.47666	0.47656	0.34971	0.47222
0	0.49389	0.32904	0.48643	0.49304	0.31503	0.47222
0	0.49633	0.31801	0.32356	0.49562	0.15029	0.33333
0	0.48411	0.48897	0.51249	0.53838	0.35549	0.52778
0	0.4621	0.59375	0.43322	0.53272	0.25723	0.5
0	0.54034	0.38603	0.54343	0.44359	0.27457	0.5
0	0.51589	0.3989	0.53203	0.44101	0.39017	0.5
0	0.5599	0.34375	0.42888	0.53735	0.2341	0.58333
0	0.62836	0.4136	0.40554	0.54869	0.10405	0.61111
0	0.66015	0.34559	0.50543	0.37609	0.31214	0.63889
0	0.22983	0.28309	0.46037	0.49871	0.33237	0.27778
0	0.46944	0.38603	0.4658	0.45647	0.27746	0.44444
0	0.30562	0.24449	0.47557	0.46625	0.15896	0.30556
0	0.50367	0.14706	0.65907	0.35858	0.31503	0.38889
0	0.44988	0.39338	0.5038	0.54766	0.24855	0.41667
0	0.39609	0.34375	0.47177	0.48995	0.27168	0.36111
0	0.55012	0.34191	0.46634	0.48429	0.17341	0.38889
0	0.44254	0.31066	0.53855	0.45698	0.27457	0.36111
0	0.44743	0.30882	0.43594	0.50232	0.20809	0.33333
0	0.38142	0.3125	0.45928	0.50077	0.32081	0.30556
0	0.42787	0.32904	0.53637	0.4575	0.41618	0.38889
0	0.35208	0.26838	0.46254	0.51777	0.2341	0.33333
0	0.40098	0.30147	0.4696	0.50489	0.24277	0.41667
0	0.6088	0.31801	0.51357	0.43431	0.19653	0.52778
0	0.4401	0.3125	0.46091	0.54405	0.30058	0.36111
0	0.43521	0.40625	0.44788	0.58114	0.17919	0.44444
0	0.45232	0.29412	0.5342	0.44925	0.31214	0.38889
0	0.35452	0.2886	0.45005	0.52859	0.18497	0.33333
0	0.55257	0.32353	0.49729	0.46316	0.25434	0.5
0	0.53301	0.32904	0.49186	0.49098	0.2659	0.47222
0	0.34963	0.27022	0.44788	0.50541	0.19364	0.33333
0	0.40587	0.27574	0.49729	0.4678	0.19364	0.38889
0	0.43032	0.30147	0.43648	0.50129	0.17919	0.38889
0	0.56479	0.16728	0.56732	0.40082	0.25434	0.44444
0	0.50122	0.36213	0.49946	0.48583	0.25723	0.47222
0	0.43276	0.30331	0.5418	0.42968	0.30925	0.41667
0	0.45477	0.24265	0.54017	0.44152	0.28613	0.38889
0	0.49878	0.38603	0.50489	0.48635	0.17919	0.5
0	0.50856	0.36029	0.44354	0.51623	0.2052	0.44444
0	0.56968	0.375	0.50326	0.46832	0.24277	0.47222
0	0.53545	0.21324	0.5418	0.41731	0.26879	0.44444
0	0.56235	0.27022	0.47774	0.42504	0.17919	0.41667
0	0.46944	0.31434	0.47828	0.49665	0.19942	0.38889
0	0.43276	0.17647	0.62106	0.40289	0.35838	0.30556
0	0.42054	0.32904	0.45005	0.54611	0.27457	0.38889
0	0.40342	0.33824	0.46145	0.53117	0.25145	0.41667
0	0.511	0.32904	0.46363	0.53838	0.19653	0.41667
0	0.55746	0.32353	0.44245	0.51417	0.23121	0.52778
0	0.60391	0.34007	0.45005	0.48583	0.21387	0.52778
0	0.3912	0.22978	0.538	0.4781	0.31792	0.41667
0	0.6088	0.36765	0.48806	0.46316	0.18208	0.5
0	0.59902	0.2739	0.52769	0.41061	0.21676	0.5
0	0.50367	0.33824	0.51412	0.47038	0.23988	0.44444
0	0.44988	0.28125	0.57329	0.45389	0.26301	0.27778
0	0.52567	0.3364	0.49457	0.4678	0.20809	0.5
0	0.39853	0.27022	0.53583	0.43483	0.33526	0.33333
0	0.43032	0.35846	0.46363	0.50902	0.17341	0.44444
0	0.29095	0.20772	0.48588	0.50129	0.23988	0.33333
0	0.49633	0.27206	0.54072	0.43534	0.28324	0.44444
0	0.4401	0.24449	0.50977	0.48635	0.31214	0.41667
0	0.51589	0.19301	0.47068	0.47707	0.31503	0.47222
0	0.24939	0.21691	0.53909	0.47398	0.24277	0.25
0	0.51345	0.20404	0.5646	0.42813	0.27168	0.47222
0	0.32029	0.19118	0.47394	0.47604	0.16185	0.25
0	0.49878	0.4375	0.40988	0.57239	0.18497	0.44444
0	0.41076	0.29596	0.47937	0.51468	0.24855	0.38889
0	0.47188	0.40441	0.48154	0.55848	0.10405	0.44444
0	0.50611	0.37868	0.59175	0.43019	0.42775	0.52778
0	0.5868	0.33456	0.5038	0.49614	0.20809	0.58333
0	0.56968	0.35846	0.53746	0.46625	0.19653	0.52778
0	0.47188	0.41544	0.46688	0.50953	0.28613	0.44444
0	0.60391	0.27022	0.5152	0.45956	0.13584	0.44444
0	0.55746	0.31066	0.48208	0.49098	0.18208	0.52778
0	0.39853	0.19118	0.48154	0.45028	0.22543	0.33333
0	0.43765	0.30515	0.54615	0.4611	0.27457	0.41667
0	0.45477	0.29412	0.39739	0.52653	0.19942	0.5
0	0.40831	0.39338	0.48371	0.51211	0.28324	0.38889
0	0.62347	0.29044	0.60695	0.38949	0.2341	0.52778
0	0.49389	0.40074	0.42074	0.51211	0.15607	0.47222
0	0.51345	0.29963	0.58035	0.42607	0.29769	0.47222
0	0.5599	0.35662	0.43811	0.5389	0.22832	0.52778
0	0.45232	0.26287	0.50489	0.43534	0.25723	0.38889
0	0.33007	0.29596	0.41802	0.58578	0.24277	0.30556
0	0.2934	0.26287	0.59555	0.41061	0.35549	0.27778
0	0.38142	0.31985	0.58469	0.44719	0.41329	0.30556
0	0.4401	0.23713	0.61998	0.39258	0.48555	0.30556
0	0.38386	0.26103	0.48208	0.48892	0.28613	0.30556
0	0.40342	0.25368	0.59012	0.40598	0.36994	0.33333
0	0.48166	0.27022	0.61401	0.38949	0.37861	0.41667
0	0.24694	0.18934	0.65038	0.40752	0.25434	0.19444
0	0.18826	0.23713	0.5456	0.45131	0.28613	0.13889
0	0.4621	0.31985	0.56732	0.42813	0.37283	0.47222
0	0.32763	0.22794	0.63355	0.38434	0.39884	0.33333
0	0.40831	0.16912	0.57492	0.47913	0.37572	0.19444
0	0.40587	0.40625	0.48697	0.50026	0.30925	0.38889
0	0.24205	0.31066	0.60641	0.47656	0.32659	0.13889
0	0.44254	0.30882	0.55049	0.44307	0.3237	0.44444
0	0.58924	0.35846	0.46037	0.49923	0.18497	0.52778
0	0.36186	0.32904	0.52823	0.43277	0.3237	0.36111
0	0.20049	0.27757	0.46526	0.52138	0.19942	0.27778
0	0.38875	0.2261	0.54017	0.49717	0.28035	0.30556
0	0.27628	0.18566	0.5874	0.44359	0.30058	0.16667
0	0.41076	0.29596	0.51303	0.4915	0.32659	0.33333
0	0.39853	0.24081	0.56298	0.46728	0.39017	0.22222
0	0.53056	0.33272	0.58632	0.46059	0.34104	0.33333
0	0.37164	0.30147	0.62106	0.44101	0.43353	0.25
0	0.55746	0.20404	0.59609	0.43689	0.30347	0.38889
0	0.45477	0.23713	0.59609	0.4204	0.38439	0.36111
0	0.52323	0.25368	0.61129	0.38743	0.32948	0.44444
0	0.29584	0.23529	0.45494	0.47192	0.21387	0.19444
0	0.49878	0.23162	0.57275	0.41113	0.35838	0.41667
0	0.37164	0.14522	0.63246	0.42658	0.28613	0.27778
0	0.40831	0.25735	0.60803	0.43225	0.39595	0.36111
0	0.44988	0.2261	0.54995	0.46574	0.3237	0.33333
0	0.49633	0.25	0.51412	0.42092	0.34104	0.38889
0	0.35697	0.22059	0.59935	0.41783	0.3237	0.27778
0	0.35941	0.32353	0.61835	0.41319	0.34393	0.30556
0	0.52812	0.24449	0.59881	0.41061	0.30925	0.47222
0	0.50367	0.25735	0.57872	0.41937	0.34393	0.47222
0	0.58924	0.23897	0.56026	0.3967	0.36127	0.5
0	0.49144	0.25735	0.58469	0.39207	0.3815	0.36111
0	0.50122	0.18199	0.63681	0.39876	0.42775	0.33333
0	0.55257	0.20221	0.55103	0.45131	0.30058	0.44444
0	0.38142	0.27941	0.55212	0.45904	0.28324	0.33333
0	0.47188	0.22426	0.54126	0.40237	0.3237	0.38889
0	0.35697	0.22243	0.62161	0.43895	0.3526	0.27778
0	0.48166	0.22426	0.59229	0.42092	0.31792	0.30556
0	0.46455	0.23529	0.59446	0.38743	0.39017	0.38889
0	0.47677	0.17831	0.60966	0.35188	0.42197	0.41667
0	0.44743	0.15809	0.59501	0.39258	0.36416	0.36111
0	0.43521	0.19853	0.58089	0.38279	0.3237	0.30556
0	0.50611	0.20221	0.63735	0.3457	0.4104	0.38889
0	0.33496	0.2114	0.58415	0.43895	0.42775	0.27778
0	0.34474	0.2114	0.5494	0.44152	0.33526	0.33333
0	0.34719	0.23346	0.5798	0.42092	0.33815	0.27778
0	0.39853	0.27574	0.51629	0.51365	0.18497	0.38889
0	0.36919	0.27206	0.57112	0.44513	0.31503	0.30556
0	0.53056	0.24816	0.50109	0.47244	0.23988	0.36111
0	0.54279	0.34375	0.49946	0.44307	0.24855	0.44444
0	0.42054	0.28493	0.5532	0.42195	0.23988	0.44444
0	0.49633	0.1875	0.58306	0.38382	0.34682	0.38889
0	0.38631	0.18566	0.56895	0.42968	0.25434	0.27778
0	0.44988	0.22059	0.55429	0.43843	0.33526	0.36111
0	0.34963	0.34375	0.53149	0.46265	0.31792	0.33333
0	0.48166	0.12868	0.62161	0.34776	0.31503	0.38889
0	0.32029	0.29963	0.61075	0.41525	0.33815	0.25
0	0.489	0.29779	0.5836	0.45853	0.36416	0.36111
0	0.50122	0.33456	0.58632	0.43483	0.30636	0.41667
0	0.511	0.28125	0.59989	0.37043	0.34682	0.44444
0	0.38631	0.26654	0.48751	0.43328	0.20809	0.30556
0	0.46699	0.24449	0.39142	0.45389	0.1763	0.27778
0	0.41076	0.24816	0.52172	0.41937	0.21965	0.33333
0	0.5379	0.13603	0.67481	0.34724	0.36416	0.33333
0	0.5599	0.20772	0.59501	0.38228	0.31214	0.47222
0	0.48166	0.29779	0.59989	0.39825	0.3526	0.41667
0	0.50122	0.17096	0.59392	0.3797	0.32948	0.30556
0	0.39853	0.23346	0.56678	0.4678	0.28902	0.33333
0	0.31296	0.1875	0.49077	0.51365	0.30636	0.16667
0	0.33252	0.30882	0.59935	0.4441	0.37861	0.27778
0	0.45721	0.29779	0.52226	0.44822	0.37572	0.30556
0	0.49878	0.28493	0.5684	0.41834	0.37861	0.41667
0	0.47922	0.24632	0.58035	0.39876	0.41618	0.44444
0	0.42054	0.22243	0.5152	0.46059	0.39017	0.36111
0	0.48655	0.26838	0.47666	0.47038	0.29769	0.33333
0	0.41809	0.24632	0.53637	0.46574	0.36127	0.33333
0	0.39853	0.17463	0.49077	0.50489	0.25145	0.33333
0	0.6577	0.09375	0.65038	0.36167	0.7341	0.63889
0	0.35941	0.20221	0.58252	0.44049	0.31792	0.25
0	0.35697	0.25368	0.57818	0.4678	0.34393	0.25
0	0.48655	0.23897	0.53312	0.45389	0.30347	0.36111
0	0.51345	0.29596	0.60695	0.3931	0.37861	0.44444
0	0.49633	0.28125	0.54017	0.43431	0.32948	0.36111
0	0.53301	0.26654	0.55809	0.43328	0.33815	0.38889
0	0.3912	0.26471	0.56189	0.49201	0.21676	0.27778
0	0.51345	0.24816	0.5836	0.43019	0.34682	0.36111
0	0.50856	0.18015	0.5228	0.45389	0.28324	0.30556
0	0.40831	0.25	0.56243	0.45337	0.26879	0.33333
0	0.40587	0.32904	0.51629	0.4982	0.22254	0.38889
0	0.40098	0.24449	0.53746	0.47707	0.34971	0.30556
0	0.40098	0.31066	0.4962	0.5389	0.34971	0.38889
0	0.57946	0.20772	0.50651	0.47244	0.21676	0.36111
0	0.52078	0.33456	0.51357	0.44822	0.26012	0.41667
0	0.51345	0.22978	0.52552	0.4168	0.28902	0.44444
0	0.50367	0.23162	0.54506	0.4034	0.32948	0.38889
0	0.51589	0.25368	0.48643	0.4544	0.26301	0.41667
0	0.52812	0.24632	0.52932	0.45028	0.22832	0.38889
0	0.52567	0.23897	0.57438	0.40907	0.28613	0.41667
0	0.41809	0.34191	0.51629	0.48944	0.25723	0.41667
0	0.50122	0.30882	0.47883	0.54405	0.34682	0.41667
0	0.46699	0.38051	0.51412	0.50026	0.31503	0.44444
0	0.47922	0.22243	0.52172	0.46213	0.29191	0.36111
0	0.59413	0.24449	0.4886	0.43483	0.25723	0.47222
0	0.52567	0.20772	0.46851	0.48892	0.30347	0.38889
0	0.28117	0.20221	0.45114	0.49098	0.22254	0.22222
0	0.52078	0.1875	0.57492	0.50386	0.26879	0.38889
0	0.40831	0.24081	0.57709	0.47141	0.40462	0.33333
0	0.43276	0.25368	0.58795	0.45647	0.34393	0.36111
0	0.46699	0.33456	0.58523	0.44565	0.39017	0.36111
0	0.53056	0.37684	0.52443	0.5492	0.30925	0.33333
0	0.33985	0.375	0.57818	0.43637	0.42197	0.30556
0	0.50122	0.22426	0.5836	0.41319	0.27457	0.41667
0	0.58924	0.29228	0.53474	0.43174	0.28324	0.47222
0	0.43765	0.3125	0.50054	0.45698	0.33526	0.41667
0	0.4621	0.22978	0.53312	0.4338	0.40462	0.38889
0	0.33741	0.28493	0.52823	0.47244	0.28324	0.22222
0	0.4621	0.20772	0.64115	0.41783	0.29191	0.33333
0	0.39853	0.32721	0.46471	0.50644	0.24566	0.36111
0	0.34963	0.23713	0.63192	0.44977	0.4104	0.33333
0	0.42298	0.35478	0.54995	0.48016	0.32659	0.44444
0	0.36919	0.26838	0.59446	0.40855	0.36416	0.27778
0	0.40587	0.20037	0.54669	0.45028	0.34971	0.36111
0	0.40342	0.27574	0.5532	0.46265	0.30347	0.30556
0	0.48166	0.27022	0.5684	0.39619	0.39306	0.41667
0	0.43765	0.29412	0.58143	0.41886	0.36416	0.41667
0	0.43521	0.27757	0.538	0.44822	0.35549	0.27778
0	0.30807	0.27022	0.33388	0.56569	0.16185	0.33333
0	0.45232	0.20404	0.61509	0.41164	0.37861	0.30556
0	0.46699	0.30147	0.49837	0.55951	0.28613	0.27778
0	0.42543	0.2114	0.58469	0.46832	0.36705	0.27778
0	0.38386	0.19669	0.576	0.42349	0.28613	0.33333
0	0.3423	0.22978	0.58795	0.4034	0.31792	0.36111
0	0.55012	0.20772	0.57492	0.38794	0.40751	0.47222
0	0.42298	0.24081	0.49729	0.46677	0.31214	0.33333
0	0.32763	0.28676	0.55972	0.40546	0.26879	0.27778
0	0.37653	0.21507	0.64712	0.39979	0.37572	0.27778
0	0.50611	0.25368	0.59066	0.4374	0.3237	0.47222
0	0.42298	0.25184	0.5532	0.44977	0.36994	0.36111
0	0.50122	0.38603	0.54777	0.5255	0.34971	0.30556
0	0.46944	0.31066	0.52986	0.46986	0.40751	0.33333
0	0.49633	0.23346	0.56515	0.4137	0.30347	0.44444
0	0.40098	0.25919	0.56895	0.41216	0.33237	0.33333
0	0.39364	0.20956	0.53257	0.4137	0.24277	0.27778
0	0.37164	0.14706	0.66504	0.42916	0.21098	0.19444
0	0.50122	0.24449	0.58415	0.43998	0.33526	0.38889
0	0.47433	0.23713	0.60641	0.40649	0.39884	0.38889
0	0.50856	0.26838	0.59609	0.40289	0.41908	0.47222
0	0.40342	0.29044	0.51737	0.56826	0.33815	0.33333
0	0.40587	0.23713	0.51086	0.48016	0.31503	0.30556
0	0.4401	0.25368	0.52606	0.4848	0.26012	0.36111
0	0.47922	0.19118	0.52823	0.44049	0.32948	0.41667
0	0.40098	0.27574	0.51249	0.48635	0.18497	0.27778
0	0.48411	0.26471	0.45711	0.50953	0.26879	0.38889
0	0.35941	0.23346	0.46145	0.47604	0.17341	0.22222
0	0.43276	0.26103	0.50271	0.50129	0.25723	0.36111
0	0.42543	0.24816	0.48154	0.48274	0.23121	0.30556
0	0.45477	0.2261	0.61672	0.42916	0.40173	0.33333
0	0.50122	0.3125	0.57709	0.47656	0.33237	0.36111
0	0.43521	0.24265	0.47774	0.51417	0.2341	0.41667
0	0.4621	0.20404	0.55266	0.39258	0.30925	0.36111
0	0.38142	0.24449	0.57003	0.46059	0.2659	0.36111
0	0.44988	0.25735	0.55266	0.42761	0.24566	0.38889
0	0.48166	0.26654	0.47666	0.50232	0.32081	0.38889
0	0.38386	0.24816	0.53203	0.42658	0.29191	0.30556
0	0.31785	0.27206	0.52172	0.48429	0.19075	0.27778
0	0.2934	0.21324	0.53094	0.45131	0.26301	0.25
0	0.39853	0.34191	0.54126	0.5188	0.24855	0.27778
0	0.3423	0.22794	0.55863	0.44616	0.26879	0.25
0	0.36919	0.16544	0.55483	0.48223	0.27746	0.19444
0	0.40342	0.28309	0.52443	0.47141	0.27168	0.36111
0	0.50122	0.27941	0.53149	0.44359	0.2659	0.38889
0	0.43032	0.24632	0.55809	0.4441	0.25434	0.38889
0	0.4401	0.27206	0.53094	0.46935	0.28035	0.30556
0	0.36919	0.21507	0.64332	0.42607	0.31792	0.30556
0	0.40098	0.28676	0.53203	0.46265	0.40462	0.36111
0	0.37164	0.23162	0.64984	0.39876	0.2948	0.33333
0	0.46455	0.21324	0.5836	0.44152	0.35549	0.41667
0	0.46455	0.27757	0.42671	0.59763	0.2052	0.30556
0	0.34474	0.27574	0.5418	0.49562	0.31214	0.19444
0	0.49144	0.36397	0.48371	0.49974	0.17341	0.44444
0	0.48655	0.3125	0.45874	0.48944	0.2052	0.38889
0	0.50856	0.26103	0.43865	0.50026	0.21387	0.38889
0	0.43032	0.2739	0.49023	0.50592	0.30058	0.36111
0	0.35941	0.26103	0.45168	0.55023	0.14451	0.22222
0	0.47677	0.20404	0.5266	0.48583	0.1763	0.36111
0	0.49389	0.20588	0.48317	0.49871	0.18497	0.38889
0	0.45721	0.25919	0.57003	0.43895	0.31503	0.38889
0	0.27384	0.21507	0.61672	0.43843	0.27457	0.22222
0	0.26406	0.14706	0.58035	0.48377	0.2948	0.13889
0	0.39364	0.15441	0.56678	0.4374	0.22254	0.22222
0	0.43032	0.2114	0.55917	0.42401	0.33237	0.36111
0	0.37897	0.25551	0.50543	0.46059	0.24277	0.27778
0	0.489	0.31801	0.57709	0.43328	0.38728	0.38889
0	0.45477	0.24632	0.52606	0.49923	0.2659	0.30556
0	0.4621	0.22426	0.61618	0.41834	0.30058	0.30556
0	0.43765	0.24816	0.58958	0.42452	0.33815	0.38889
0	0.37897	0.33272	0.5874	0.48686	0.33815	0.25
0	0.4621	0.25551	0.58849	0.43019	0.28324	0.41667
0	0.41809	0.28676	0.50054	0.46213	0.26879	0.38889
0	0.47922	0.1875	0.5266	0.45801	0.26012	0.38889
0	0.49633	0.27574	0.59718	0.41834	0.38728	0.47222
0	0.37897	0.24081	0.54235	0.44513	0.21676	0.30556
0	0.3423	0.23897	0.62052	0.43122	0.32659	0.25
0	0.42054	0.25	0.54777	0.42916	0.27457	0.33333
0	0.40098	0.23897	0.62704	0.44152	0.37283	0.22222
0	0.23961	0.3125	0.61238	0.44307	0.32081	0.16667
0	0.32029	0.26287	0.61401	0.43483	0.23121	0.16667
0	0.3423	0.18934	0.53692	0.44771	0.16763	0.30556
0	0.33741	0.20588	0.5456	0.4204	0.21387	0.25
0	0.49144	0.21507	0.50706	0.40752	0.30925	0.41667
0	0.40831	0.2886	0.557	0.43998	0.28613	0.36111
0	0.3643	0.22059	0.5836	0.45801	0.24566	0.27778
0	0.43276	0.20772	0.5342	0.45492	0.26012	0.41667
0	0.40342	0.25368	0.5228	0.49098	0.30058	0.25
0	0.42787	0.29596	0.64767	0.41937	0.3815	0.30556
0	0.40831	0.26287	0.57709	0.46574	0.35549	0.33333
0	0.48166	0.375	0.53257	0.48738	0.32081	0.38889
0	0.41076	0.29963	0.57166	0.4338	0.31792	0.36111
0	0.50856	0.25551	0.59609	0.40443	0.33526	0.41667
0	0.49144	0.17647	0.55972	0.39207	0.27457	0.38889
0	0.50367	0.28676	0.58686	0.41577	0.42486	0.38889
0	0.41076	0.26838	0.63681	0.42813	0.34393	0.30556
0	0.44988	0.3511	0.57492	0.44101	0.38439	0.38889
0	0.50367	0.27757	0.56895	0.43586	0.32081	0.38889
0	0.54279	0.18015	0.63138	0.38176	0.31214	0.33333
0	0.44499	0.32353	0.55972	0.52602	0.3237	0.25
0	0.43521	0.34007	0.50869	0.45904	0.28613	0.44444
0	0.33741	0.3511	0.60858	0.44616	0.38439	0.30556
0	0.45966	0.30882	0.60532	0.41525	0.30925	0.41667
0	0.42298	0.27022	0.49729	0.47038	0.26301	0.36111
0	0.24694	0.23897	0.44843	0.46213	0.15607	0.19444
0	0.44743	0.26287	0.47774	0.48171	0.27168	0.33333
0	0.20293	0.40257	0.24321	0.73004	0.12717	0.27778
0	0.35941	0.30699	0.35505	0.59711	0.26012	0.33333
0	0.40098	0.26838	0.54343	0.45183	0.28902	0.30556
0	0.54279	0.30882	0.47177	0.46419	0.26012	0.38889
0	0.45966	0.26654	0.55429	0.46007	0.30925	0.30556
0	0.52078	0.30882	0.557	0.45904	0.27168	0.38889
0	0.47433	0.29596	0.49186	0.44256	0.28902	0.47222
0	0.55257	0.36581	0.42888	0.48635	0.20231	0.30556
0	0.36675	0.25551	0.50054	0.47398	0.25723	0.27778
0	0.51589	0.34559	0.54017	0.45183	0.32948	0.44444
0	0.41809	0.33088	0.49946	0.52859	0.22832	0.30556
0	0.38386	0.20404	0.59935	0.44359	0.34682	0.25
0	0.33985	0.25184	0.51683	0.50283	0.36127	0.36111
0	0.53301	0.29228	0.60098	0.38949	0.32081	0.41667
0	0.37653	0.24816	0.61292	0.43277	0.48844	0.30556
0	0.4621	0.34926	0.51249	0.45389	0.26879	0.41667
0	0.44254	0.24081	0.53474	0.44719	0.2948	0.41667
0	0.47433	0.25	0.51249	0.46677	0.36416	0.33333
0	0.47922	0.24816	0.52063	0.45028	0.24566	0.36111
0	0.43765	0.31434	0.49674	0.47398	0.31214	0.36111
0	0.42298	0.19853	0.52552	0.5219	0.23988	0.33333
0	0.3643	0.29228	0.56678	0.43689	0.34393	0.27778
0	0.4132	0.27574	0.55917	0.4441	0.37572	0.41667
0	0.60391	0.34375	0.55375	0.44359	0.30925	0.44444
0	0.55257	0.34559	0.59663	0.47295	0.38439	0.36111
0	0.48655	0.36397	0.54777	0.49356	0.33815	0.36111
0	0.55257	0.28309	0.56298	0.42504	0.28613	0.5
0	0.40831	0.29044	0.46091	0.49408	0.28902	0.36111
0	0.66259	0.26103	0.5494	0.42092	0.25723	0.52778
0	0.43765	0.26654	0.49566	0.44616	0.32948	0.33333
0	0.46455	0.24816	0.58578	0.45801	0.22543	0.36111
0	0.50611	0.21324	0.538	0.47501	0.24566	0.36111
0	0.47922	0.25368	0.5798	0.42865	0.33526	0.38889
0	0.56724	0.23529	0.49729	0.51417	0.30347	0.47222
0	0.43765	0.17647	0.59989	0.44668	0.37283	0.30556
0	0.33007	0.25551	0.46471	0.51262	0.30925	0.25
0	0.64059	0.13419	0.58469	0.35755	0.29191	0.5
0	0.40587	0.27574	0.54886	0.48635	0.36416	0.25
0	0.38631	0.30699	0.58578	0.49665	0.37861	0.25
0	0.39853	0.19853	0.55537	0.4575	0.32948	0.27778
0	0.38386	0.29044	0.5152	0.4508	0.34104	0.30556
0	0.5379	0.19853	0.54072	0.45647	0.3237	0.33333
0	0.51589	0.21691	0.59392	0.3797	0.36416	0.44444
0	0.46455	0.23897	0.50814	0.45286	0.33237	0.30556
0	0.56235	0.25919	0.55537	0.45544	0.35838	0.41667
0	0.40342	0.29412	0.47503	0.50077	0.23699	0.36111
0	0.42054	0.16544	0.51737	0.43843	0.21098	0.27778
0	0.35208	0.29779	0.56298	0.49974	0.33237	0.16667
0	0.37653	0.31985	0.52172	0.52911	0.24277	0.19444
0	0.32763	0.2739	0.58415	0.42143	0.3815	0.19444
0	0.37653	0.25184	0.58089	0.43277	0.35549	0.30556
0	0.31051	0.19118	0.5798	0.43122	0.32659	0.16667
0	0.30073	0.15257	0.60423	0.39413	0.32081	0.25
0	0.33741	0.23162	0.62106	0.3864	0.3526	0.25
0	0.38386	0.33088	0.54669	0.48738	0.37572	0.33333
0	0.48655	0.22978	0.61509	0.39258	0.38728	0.36111
0	0.45477	0.13787	0.47937	0.49871	0.28035	0.36111
0	0.57946	0.24081	0.57492	0.41577	0.36416	0.36111
0	0.511	0.38787	0.57383	0.46265	0.33526	0.41667
0	0.51345	0.22978	0.4962	0.48892	0.22832	0.38889
0	0.52567	0.14706	0.54506	0.38485	0.30347	0.38889
0	0.55746	0.26103	0.55537	0.43019	0.36994	0.41667
0	0.47188	0.22978	0.54343	0.43637	0.36705	0.36111
0	0.52567	0.20037	0.58469	0.39001	0.3237	0.38889
0	0.47188	0.20772	0.55863	0.42092	0.30347	0.27778
0	0.51834	0.25735	0.5722	0.4137	0.36705	0.44444
0	0.47188	0.23529	0.54832	0.4848	0.33526	0.33333
0	0.55501	0.29412	0.56243	0.38382	0.31503	0.44444
0	0.50367	0.19853	0.59663	0.41422	0.32081	0.27778
0	0.43276	0.23346	0.5836	0.40495	0.34682	0.38889
0	0.37408	0.26287	0.56352	0.42195	0.34393	0.33333
0	0.29095	0.17463	0.54886	0.46007	0.27168	0.19444
0	0.49144	0.26103	0.48046	0.47707	0.25723	0.44444
0	0.47677	0.22059	0.60152	0.40804	0.29769	0.41667
0	0.47922	0.26654	0.54506	0.50026	0.32948	0.30556
0	0.37653	0.27941	0.5114	0.46935	0.3237	0.19444
0	0.43276	0.25184	0.5608	0.46728	0.33237	0.25
0	0.56968	0.29412	0.52497	0.43843	0.32948	0.47222
0	0.46699	0.15993	0.50977	0.46471	0.29191	0.33333
0	0.38631	0.1875	0.53746	0.47141	0.38728	0.27778
0	0.489	0.23897	0.5228	0.47553	0.37861	0.36111
0	0.38142	0.29963	0.50651	0.49974	0.34682	0.30556
0	0.34474	0.32353	0.53257	0.45337	0.30058	0.30556
0	0.54279	0.18566	0.64549	0.33694	0.32948	0.44444
0	0.32274	0.33456	0.55429	0.44565	0.43353	0.25
0	0.48166	0.25735	0.57275	0.42092	0.26301	0.36111
0	0.489	0.2739	0.49729	0.48068	0.28613	0.36111
0	0.54034	0.29963	0.54995	0.42349	0.36416	0.47222
0	0.52567	0.24081	0.48263	0.50799	0.31792	0.38889
0	0.56479	0.25368	0.52063	0.50747	0.27457	0.38889
0	0.47922	0.28676	0.58198	0.44152	0.30925	0.36111
0	0.52567	0.3364	0.52443	0.4745	0.33815	0.47222
0	0.50611	0.51103	0.51629	0.52756	0.32081	0.47222
0	0.42054	0.26838	0.56352	0.48944	0.25723	0.25
0	0.41076	0.30147	0.53637	0.49047	0.20231	0.27778
0	0.62836	0.28309	0.63464	0.42246	0.21965	0.47222
0	0.44499	0.33088	0.55917	0.47707	0.30347	0.41667
0	0.53056	0.23162	0.59229	0.41473	0.28902	0.41667
0	0.3643	0.1636	0.59718	0.41783	0.24855	0.25
0	0.66259	0.2739	0.52877	0.49871	0.13295	0.5
0	0.51834	0.23897	0.62215	0.38382	0.33815	0.38889
0	0.48411	0.23897	0.64821	0.38228	0.36416	0.38889
0	0.45721	0.22794	0.55917	0.47398	0.35838	0.30556
0	0.54034	0.25	0.54126	0.46316	0.20231	0.30556
0	0.62592	0.1875	0.56406	0.44101	0.18497	0.41667
0	0.53545	0.26287	0.66558	0.39567	0.27457	0.41667
0	0.55746	0.26838	0.60043	0.40907	0.22543	0.41667
0	0.55012	0.25368	0.68838	0.36682	0.30925	0.44444
0	0.40342	0.25184	0.52497	0.47244	0.15896	0.30556
0	0.489	0.19485	0.67752	0.21844	0.74855	0.58333
0	0.51834	0.17096	0.63844	0.37867	0.26012	0.36111
0	0.54523	0.22243	0.59066	0.42143	0.2659	0.41667
0	0.47188	0.25368	0.55863	0.42298	0.45087	0.44444
0	0.47433	0.26654	0.61509	0.42761	0.43064	0.38889
0	0.52078	0.28125	0.54615	0.45286	0.34393	0.41667
0	0.52323	0.23529	0.57655	0.41989	0.3237	0.47222
0	0.54768	0.26838	0.50271	0.47656	0.26879	0.41667
0	0.50367	0.26471	0.57166	0.43637	0.32081	0.47222
0	0.52567	0.21691	0.60966	0.37609	0.29769	0.41667
0	0.63081	0.29963	0.53474	0.45595	0.16185	0.55556
0	0.4132	0.15993	0.60966	0.42143	0.27746	0.30556
0	0.60391	0.25184	0.53366	0.41628	0.24855	0.41667
0	0.53545	0.17831	0.59121	0.44719	0.2948	0.33333
0	0.45232	0.22794	0.50109	0.49974	0.22543	0.33333
0	0.51345	0.2114	0.56243	0.46059	0.2659	0.36111
0	0.51834	0.21507	0.5874	0.47656	0.30636	0.38889
0	0.54279	0.1875	0.5456	0.4374	0.25145	0.41667
0	0.49878	0.24265	0.5874	0.4034	0.36416	0.41667
0	0.53301	0.18015	0.58089	0.40701	0.25723	0.41667
0	0.40342	0.20588	0.61509	0.45286	0.27746	0.27778
0	0.54523	0.18015	0.59229	0.41267	0.22254	0.47222
0	0.57213	0.20956	0.58469	0.41267	0.16474	0.44444
0	0.48655	0.26838	0.51412	0.4374	0.2948	0.36111
0	0.39853	0.36949	0.43322	0.55435	0.22543	0.30556
0	0.489	0.22059	0.5342	0.45492	0.23988	0.38889
0	0.37897	0.27206	0.53149	0.50026	0.28035	0.30556
0	0.52812	0.17647	0.53963	0.48429	0.26301	0.33333
0	0.45721	0.29963	0.54289	0.43689	0.24277	0.41667
0	0.51834	0.29412	0.53529	0.42143	0.32659	0.44444
0	0.46455	0.24265	0.59555	0.3694	0.36127	0.38889
0	0.52812	0.24265	0.69978	0.31788	0.55491	0.55556
0	0.46455	0.24816	0.5608	0.42968	0.31214	0.41667
0	0.47188	0.25551	0.50923	0.47398	0.27168	0.38889
0	0.4621	0.25368	0.56406	0.42658	0.26301	0.30556
0	0.43276	0.21691	0.59175	0.45337	0.43353	0.30556
0	0.45966	0.26471	0.57709	0.48995	0.31792	0.33333
0	0.44254	0.24816	0.5836	0.42658	0.39884	0.41667
0	0.52323	0.27022	0.57492	0.40752	0.34393	0.44444
0	0.59658	0.26471	0.61781	0.36579	0.28035	0.52778
0	0.45966	0.22243	0.64332	0.39464	0.41618	0.38889
0	0.44499	0.35478	0.54506	0.53838	0.33526	0.38889
0	0.45721	0.22059	0.59229	0.41731	0.30925	0.41667
0	0.47433	0.18566	0.57438	0.43122	0.28324	0.33333
0	0.48655	0.27941	0.5532	0.43019	0.31792	0.41667
0	0.41565	0.29596	0.64712	0.44256	0.45665	0.25
0	0.40587	0.25735	0.55157	0.43534	0.3237	0.30556
0	0.37653	0.25368	0.66395	0.40392	0.40173	0.33333
0	0.44743	0.2739	0.44951	0.51984	0.27457	0.41667
0	0.49633	0.24816	0.64115	0.37558	0.42775	0.44444
0	0.45477	0.27022	0.65961	0.36837	0.36416	0.41667
0	0.37164	0.16912	0.59555	0.41164	0.3237	0.22222
0	0.42298	0.1875	0.60858	0.38949	0.33815	0.36111
0	0.49633	0.23529	0.54832	0.43895	0.28902	0.41667
0	0.40831	0.30147	0.538	0.53684	0.26301	0.27778
0	0.44988	0.19301	0.56515	0.4271	0.3815	0.27778
0	0.47677	0.14522	0.59555	0.3524	0.30636	0.33333
0	0.54768	0.21507	0.63464	0.34673	0.41329	0.33333
0	0.57702	0.22059	0.60261	0.41319	0.28035	0.33333
0	0.41076	0.30699	0.5836	0.44462	0.34104	0.30556
0	0.50611	0.23346	0.60532	0.34209	0.35838	0.36111
0	0.40342	0.29228	0.60152	0.37919	0.39884	0.33333
0	0.51589	0.34375	0.62161	0.43328	0.25723	0.36111
0	0.37897	0.29596	0.52932	0.48738	0.32948	0.36111
0	0.41565	0.27574	0.58035	0.4204	0.33237	0.38889
0	0.3912	0.19853	0.58686	0.41886	0.31214	0.27778
0	0.47922	0.29412	0.65418	0.34724	0.38728	0.44444
0	0.48166	0.25551	0.6911	0.35188	0.45665	0.33333
0	0.43276	0.24265	0.64875	0.38279	0.36127	0.33333
0	0.43765	0.29596	0.62324	0.40907	0.42486	0.36111
0	0.42298	0.3364	0.61726	0.34982	0.36705	0.44444
0	0.52323	0.21507	0.62649	0.34003	0.29769	0.41667
0	0.45721	0.31434	0.56678	0.43946	0.20809	0.33333
0	0.26406	0.2261	0.59338	0.39773	0.31214	0.22222
0	0.45477	0.2261	0.62215	0.4034	0.37283	0.36111
0	0.4401	0.25368	0.5494	0.4781	0.19364	0.47222
0	0.41809	0.27574	0.56732	0.43843	0.40751	0.33333
0	0.47922	0.29412	0.63844	0.36682	0.51734	0.47222
0	0.51589	0.22978	0.60261	0.4034	0.42775	0.36111
0	0.56479	0.24081	0.58252	0.38743	0.34393	0.44444
0	0.51345	0.18382	0.62921	0.37403	0.43353	0.47222
0	0.45232	0.17279	0.62052	0.35446	0.32948	0.36111
0	0.42543	0.26103	0.64767	0.41525	0.35838	0.33333
0	0.53056	0.22794	0.64929	0.35188	0.34971	0.44444
0	0.53301	0.20588	0.60858	0.39567	0.27746	0.41667
0	0.41076	0.18382	0.66775	0.38794	0.44509	0.19444
0	0.48411	0.21691	0.65635	0.38022	0.38728	0.36111
0	0.40587	0.22243	0.65581	0.41164	0.34682	0.27778
0	0.51345	0.45037	0.56406	0.46832	0.30925	0.47222
0	0.59902	0.29779	0.57818	0.36734	0.28902	0.44444
0	0.50122	0.26838	0.65581	0.33127	0.35549	0.47222
0	0.47188	0.23897	0.63246	0.37764	0.34971	0.38889
0	0.43276	0.25551	0.61672	0.38125	0.37572	0.36111
0	0.48655	0.35478	0.62866	0.37455	0.32948	0.47222
0	0.45721	0.25551	0.5608	0.4544	0.3815	0.36111
0	0.36186	0.26838	0.60858	0.42246	0.4422	0.33333
0	0.49633	0.32169	0.61672	0.35497	0.45665	0.47222
0	0.489	0.23162	0.60966	0.40855	0.39306	0.30556
0	0.52567	0.32537	0.5342	0.41525	0.28613	0.41667
0	0.46455	0.23713	0.7101	0.3287	0.40751	0.41667
0	0.55746	0.2261	0.60912	0.39104	0.36994	0.41667
0	0.39364	0.33272	0.61238	0.46007	0.33237	0.33333
0	0.44254	0.23897	0.70575	0.32303	0.39884	0.38889
0	0.44988	0.20588	0.68838	0.32354	0.39017	0.36111
0	0.45232	0.17831	0.72638	0.30345	0.41908	0.33333
0	0.47677	0.36213	0.48263	0.48944	0.3526	0.44444
0	0.40342	0.19118	0.60098	0.43689	0.40462	0.25
0	0.32274	0.36765	0.57003	0.46213	0.46532	0.27778
0	0.43276	0.20772	0.64007	0.41164	0.4422	0.27778
0	0.4132	0.32537	0.5266	0.41628	0.37283	0.36111
0	0.511	0.30515	0.57872	0.40082	0.41908	0.44444
0	0.45721	0.23529	0.58469	0.41164	0.33237	0.38889
0	0.37164	0.26287	0.576	0.44977	0.43064	0.36111
0	0.52078	0.23897	0.62215	0.40185	0.33815	0.41667
0	0.43276	0.24265	0.61238	0.3864	0.34682	0.36111
0	0.50367	0.25919	0.59989	0.43225	0.31503	0.36111
0	0.41809	0.24632	0.63192	0.38794	0.44798	0.36111
0	0.4132	0.35478	0.62324	0.38949	0.50867	0.38889
0	0.50367	0.18566	0.63626	0.40958	0.36416	0.36111
0	0.55501	0.30699	0.51412	0.41886	0.22832	0.44444
0	0.52812	0.26471	0.60803	0.35446	0.40462	0.41667
0	0.42054	0.24816	0.63464	0.41628	0.37861	0.33333
0	0.52812	0.12316	0.74104	0.18496	0.78035	0.55556
0	0.46699	0.23529	0.538	0.42401	0.26301	0.36111
0	0.37653	0.23529	0.57275	0.41886	0.31503	0.27778
0	0.47188	0.30515	0.5076	0.47038	0.30058	0.38889
0	0.41565	0.26654	0.65635	0.37455	0.44509	0.33333
0	0.49144	0.18566	0.60098	0.35033	0.27168	0.36111
0	0.47433	0.30882	0.56298	0.49253	0.27457	0.30556
0	0.38142	0.24265	0.61889	0.46625	0.3815	0.30556
0	0.45477	0.28125	0.55212	0.44152	0.37861	0.38889
0	0.43521	0.28125	0.58415	0.40804	0.40751	0.38889
0	0.60636	0.34559	0.52877	0.41577	0.23121	0.5
0	0.28117	0.36213	0.50434	0.5018	0.34393	0.19444
0	0.35941	0.32537	0.61781	0.39825	0.3815	0.30556
0	0.40098	0.20221	0.62866	0.41473	0.35549	0.38889
0	0.42298	0.18934	0.59718	0.41577	0.29191	0.30556
0	0.53056	0.29228	0.49186	0.53632	0.27457	0.33333
0	0.39364	0.17096	0.65201	0.42607	0.42775	0.27778
0	0.49878	0.18199	0.60423	0.40495	0.23699	0.41667
0	0.50611	0.17463	0.64658	0.39052	0.35549	0.38889
0	0.43765	0.23162	0.75136	0.2983	0.45954	0.44444
0	0.34474	0.18015	0.66504	0.38434	0.36994	0.33333
0	0.43032	0.24632	0.63084	0.46162	0.31214	0.36111
0	0.4401	0.29044	0.60749	0.39155	0.33815	0.38889
0	0.50856	0.26103	0.56895	0.38691	0.27746	0.38889
0	0.45721	0.22794	0.61726	0.40443	0.3815	0.33333
0	0.57702	0.23346	0.57546	0.41319	0.26879	0.41667
0	0.44499	0.20588	0.64332	0.38279	0.46243	0.30556
0	0.511	0.26103	0.59609	0.38125	0.47977	0.5
0	0.50367	0.22978	0.62106	0.41886	0.39306	0.38889
0	0.489	0.27022	0.58632	0.40598	0.29769	0.36111
0	0.51345	0.25919	0.69273	0.31685	0.5	0.41667
0	0.59902	0.2261	0.61183	0.34518	0.33526	0.47222
0	0.54523	0.06985	0.85233	0.06028	0.71965	0.58333
0	0.43765	0.22794	0.57492	0.42092	0.21387	0.36111
0	0.45477	0.19118	0.62486	0.35343	0.31503	0.36111
0	0.42787	0.22426	0.59175	0.43122	0.33815	0.30556
0	0.42298	0.35294	0.42671	0.63885	0.3526	0.27778
0	0.45232	0.27022	0.56623	0.44307	0.40173	0.33333
0	0.39364	0.20956	0.56569	0.44101	0.32081	0.30556
0	0.38875	0.28309	0.51846	0.47656	0.30636	0.33333
0	0.44254	0.30331	0.49457	0.44359	0.3237	0.44444
0	0.37164	0.21324	0.58035	0.43946	0.3526	0.33333
0	0.42543	0.29412	0.52389	0.44307	0.32659	0.30556
0	0.39364	0.25735	0.56569	0.42298	0.34971	0.30556
0	0.46944	0.41728	0.43214	0.5322	0.03468	0.52778
0	0.45232	0.27206	0.59663	0.42865	0.30925	0.36111
0	0.35941	0.24816	0.57329	0.47089	0.35838	0.27778
0	0.51589	0.16912	0.57112	0.39001	0.34971	0.41667
0	0.50611	0.28309	0.59446	0.39876	0.42775	0.44444
0	0.46455	0.27941	0.51629	0.46213	0.31503	0.41667
0	0.489	0.24081	0.66178	0.33797	0.43353	0.41667
0	0.54523	0.28676	0.56732	0.39928	0.26012	0.47222
0	0.43032	0.25735	0.65472	0.38228	0.38439	0.30556
0	0.52323	0.24265	0.61346	0.37403	0.35838	0.38889
0	0.50122	0.25735	0.56949	0.42298	0.2948	0.38889
0	0.4401	0.23162	0.58632	0.4544	0.26012	0.38889
0	0.50367	0.1636	0.68132	0.38537	0.42775	0.36111
0	0.5379	0.24632	0.56895	0.40701	0.37572	0.41667
0	0.46455	0.27022	0.56406	0.45853	0.28035	0.36111
0	0.42787	0.13603	0.51954	0.45234	0.34682	0.36111
0	0.47433	0.25551	0.61618	0.35549	0.5	0.41667
0	0.4621	0.26287	0.63844	0.38485	0.45954	0.33333
0	0.45721	0.29412	0.57546	0.43122	0.31792	0.38889
0	0.47922	0.26471	0.59555	0.38434	0.36127	0.36111
0	0.45232	0.24081	0.5532	0.42916	0.29191	0.38889
0	0.42054	0.24265	0.59175	0.40907	0.34393	0.36111
0	0.55501	0.47794	0.51466	0.50902	0.13873	0.58333
0	0.43276	0.32169	0.56135	0.44771	0.37283	0.38889
0	0.511	0.30331	0.59718	0.39516	0.43064	0.41667
0	0.57946	0.22794	0.61401	0.40907	0.30058	0.47222
0	0.55012	0.26471	0.53312	0.41061	0.23699	0.41667
0	0.62347	0.30331	0.60152	0.35549	0.30058	0.5
0	0.54279	0.23897	0.61509	0.37609	0.2948	0.41667
0	0.50856	0.25184	0.62486	0.41267	0.36416	0.38889
0	0.51345	0.25735	0.5836	0.40907	0.31792	0.36111
0	0.42787	0.33456	0.58523	0.40598	0.35549	0.30556
0	0.52078	0.25735	0.57383	0.42658	0.33526	0.36111
0	0.489	0.25	0.57112	0.41731	0.36994	0.44444
0	0.49633	0.30515	0.63301	0.36734	0.44798	0.41667
0	0.5379	0.30882	0.58632	0.41525	0.41329	0.47222
0	0.5868	0.26287	0.58849	0.34776	0.26301	0.47222
0	0.47433	0.22243	0.67861	0.30551	0.36994	0.33333
0	0.49144	0.20037	0.64875	0.3627	0.33815	0.47222
0	0.49389	0.26838	0.63464	0.39516	0.3526	0.36111
0	0.45477	0.25735	0.64821	0.36785	0.35838	0.36111
0	0.48655	0.16912	0.63084	0.39464	0.30636	0.38889
0	0.49389	0.17647	0.7025	0.33849	0.33815	0.36111
0	0.50122	0.23897	0.5798	0.41164	0.34682	0.36111
0	0.47188	0.23897	0.54669	0.45904	0.28324	0.33333
0	0.42787	0.15074	0.52063	0.45234	0.26012	0.22222
0	0.45477	0.21324	0.64929	0.44668	0.43064	0.30556
0	0.51589	0.18382	0.67535	0.33385	0.50289	0.41667
0	0.59413	0.25919	0.63192	0.33539	0.33237	0.47222
0	0.5599	0.21507	0.64658	0.33385	0.34682	0.44444
0	0.52323	0.33824	0.64875	0.41989	0.30636	0.38889
0	0.31296	0.3511	0.54397	0.39722	0.34971	0.30556
0	0.54768	0.24265	0.56298	0.4338	0.24566	0.47222
0	0.58191	0.21875	0.59121	0.43534	0.2659	0.41667
0	0.46944	0.27574	0.57166	0.43483	0.33237	0.44444
0	0.54034	0.28676	0.57166	0.40082	0.27746	0.41667
0	0.50122	0.2886	0.58632	0.4168	0.30636	0.41667
0	0.41076	0.21875	0.60152	0.48583	0.17919	0.30556
0	0.4401	0.20588	0.55646	0.45028	0.30058	0.38889
0	0.47677	0.17463	0.59989	0.42555	0.25145	0.38889
0	0.50122	0.16544	0.57763	0.42916	0.28324	0.33333
0	0.511	0.36397	0.36591	0.58114	0.16763	0.5
0	0.38142	0.20037	0.56895	0.47038	0.42775	0.25
0	0.32518	0.35662	0.59229	0.43483	0.45954	0.30556
0	0.53545	0.22794	0.5836	0.47913	0.25145	0.41667
0	0.511	0.24081	0.5532	0.43689	0.25145	0.41667
0	0.38142	0.30331	0.48588	0.4781	0.24566	0.38889
0	0.35697	0.21691	0.60749	0.41937	0.28902	0.30556
0	0.43521	0.24816	0.5532	0.44359	0.33815	0.36111
0	0.45721	0.29963	0.53692	0.47707	0.32081	0.36111
0	0.45232	0.25368	0.58958	0.42968	0.2659	0.36111
0	0.54279	0.20588	0.60803	0.37455	0.27746	0.47222
0	0.40098	0.33272	0.5418	0.50489	0.35838	0.30556
0	0.42298	0.26287	0.59826	0.43174	0.4711	0.30556
0	0.50367	0.20772	0.55103	0.46007	0.28324	0.33333
0	0.42787	0.25551	0.55266	0.42968	0.33815	0.30556
0	0.57702	0.27022	0.51466	0.43534	0.17052	0.41667
0	0.45721	0.2261	0.58035	0.44256	0.32948	0.38889
0	0.46699	0.32721	0.49511	0.55487	0.19364	0.33333
0	0.36186	0.17096	0.61726	0.42195	0.35838	0.38889
0	0.51345	0.26471	0.53963	0.45131	0.30347	0.38889
0	0.53545	0.26103	0.52389	0.46265	0.21387	0.44444
0	0.42054	0.26838	0.56026	0.46574	0.3237	0.33333
0	0.44988	0.40441	0.53583	0.53323	0.25723	0.38889
0	0.47677	0.2261	0.63084	0.45389	0.28613	0.30556
0	0.53301	0.2261	0.59772	0.39207	0.25723	0.41667
0	0.46944	0.30147	0.58415	0.41731	0.28613	0.41667
0	0.48655	0.24265	0.58578	0.40701	0.30925	0.38889
0	0.61125	0.22243	0.59555	0.39361	0.24855	0.47222
0	0.47433	0.26287	0.5646	0.48326	0.19364	0.36111
0	0.32518	0.20404	0.61564	0.4101	0.30058	0.30556
0	0.46944	0.2114	0.53855	0.44719	0.19942	0.36111
0	0.60391	0.34559	0.57329	0.44822	0.15896	0.55556
0	0.44988	0.25735	0.4696	0.53838	0.28902	0.33333
0	0.49878	0.26838	0.53855	0.45286	0.3237	0.41667
0	0.52567	0.19853	0.59826	0.45647	0.31792	0.33333
0	0.56479	0.34191	0.50326	0.45698	0.27746	0.44444
0	0.60147	0.29779	0.52986	0.46574	0.28035	0.5
0	0.46455	0.17279	0.55863	0.41937	0.28035	0.38889
0	0.49633	0.29596	0.5646	0.46883	0.30925	0.38889
0	0.38386	0.22978	0.60478	0.46316	0.31792	0.27778
0	0.3912	0.24632	0.58523	0.43534	0.28613	0.38889
0	0.43521	0.22978	0.58306	0.43328	0.28324	0.41667
0	0.52567	0.20037	0.42888	0.4611	0.15607	0.41667
0	0.37164	0.33088	0.55157	0.55332	0.31503	0.16667
0	0.50367	0.3364	0.51683	0.45698	0.31214	0.38889
0	0.50611	0.23346	0.54723	0.4544	0.2948	0.44444
0	0.50856	0.19301	0.5836	0.40082	0.26012	0.41667
0	0.46455	0.2261	0.63789	0.37558	0.41908	0.38889
0	0.42543	0.2261	0.63626	0.38279	0.35549	0.38889
0	0.43765	0.23713	0.61292	0.41989	0.37572	0.33333
0	0.41565	0.27022	0.59012	0.4374	0.31503	0.30556
0	0.45966	0.2261	0.5608	0.44668	0.30636	0.36111
0	0.55257	0.25	0.4506	0.50799	0.16763	0.44444
0	0.40342	0.22978	0.62378	0.44513	0.34393	0.19444
0	0.48166	0.21507	0.62161	0.41731	0.33526	0.30556
0	0.55746	0.16544	0.61183	0.39413	0.35549	0.41667
0	0.43032	0.30331	0.50543	0.45904	0.35838	0.33333
0	0.56479	0.25184	0.61618	0.37455	0.30058	0.41667
0	0.52567	0.23346	0.59772	0.40598	0.26879	0.38889
0	0.36186	0.27022	0.62052	0.46213	0.18208	0.25
0	0.44254	0.20956	0.58958	0.40082	0.25145	0.33333
0	0.49389	0.28309	0.62812	0.39516	0.2948	0.38889
0	0.38386	0.2114	0.57546	0.40495	0.33815	0.33333
0	0.38386	0.1489	0.58469	0.40185	0.38728	0.41667
0	0.36675	0.24816	0.59555	0.40134	0.32948	0.38889
0	0.4401	0.20588	0.41585	0.51108	0.28324	0.33333
0	0.42787	0.22243	0.65309	0.36579	0.41329	0.41667
0	0.38631	0.32537	0.53746	0.43174	0.25434	0.44444
0	0.32763	0.2261	0.63518	0.35188	0.30636	0.36111
0	0.40831	0.22794	0.57058	0.42658	0.31214	0.36111
0	0.3154	0.17463	0.5266	0.47089	0.32659	0.30556
0	0.42298	0.25551	0.4354	0.58166	0.20231	0.30556
0	0.34474	0.29412	0.53963	0.44462	0.28613	0.27778
0	0.45721	0.27941	0.5456	0.45183	0.32659	0.44444
0	0.49389	0.2114	0.52769	0.42504	0.36994	0.41667
0	0.47188	0.24265	0.57438	0.41834	0.27746	0.41667
0	0.44499	0.17096	0.5038	0.4374	0.31503	0.38889
0	0.38631	0.21691	0.54126	0.4271	0.27746	0.33333
0	0.29584	0.24449	0.51792	0.45131	0.30058	0.27778
0	0.22249	0.24816	0.45223	0.50438	0.21676	0.19444
0	0.26406	0.2114	0.55646	0.43225	0.33815	0.22222
0	0.27873	0.21875	0.51792	0.51932	0.2659	0.25
0	0.44499	0.29412	0.5114	0.45956	0.25145	0.41667
0	0.23961	0.19485	0.43485	0.50696	0.17919	0.19444
0	0.23472	0.38603	0.62812	0.43689	0.26301	0.33333
0	0.40587	0.15074	0.4544	0.47398	0.31503	0.36111
0	0.39853	0.33088	0.48588	0.47192	0.30636	0.38889
0	0.3643	0.24265	0.54832	0.44359	0.33815	0.38889
0	0.18582	0.18934	0.56623	0.41061	0.26301	0.22222
0	0.33007	0.2739	0.6911	0.35961	0.3815	0.36111
0	0.33741	0.20588	0.46526	0.5219	0.25434	0.27778
0	0.41565	0.25	0.58686	0.46265	0.35549	0.33333
0	0.2934	0.14522	0.5684	0.41989	0.3526	0.25
0	0.55501	0.33824	0.56732	0.39619	0.34682	0.44444
0	0.51345	0.18015	0.62975	0.37146	0.39017	0.41667
0	0.33252	0.16912	0.53149	0.42813	0.2948	0.30556
0	0.50122	0.2114	0.60858	0.30809	0.37861	0.38889
0	0.29829	0.2114	0.58523	0.36682	0.26301	0.25
0	0.40098	0.17647	0.63029	0.38846	0.36994	0.36111
0	0.40587	0.16544	0.5304	0.45904	0.33237	0.27778
0	0.41076	0.25919	0.57492	0.46419	0.39595	0.38889
0	0.50122	0.21691	0.59392	0.42349	0.3526	0.38889
0	0.45232	0.20221	0.54832	0.4168	0.34682	0.38889
0	0.44988	0.20037	0.58469	0.4101	0.34682	0.33333
0	0.40587	0.23162	0.58306	0.38846	0.39306	0.36111
0	0.52567	0.17647	0.55049	0.40701	0.35549	0.44444
0	0.34719	0.22059	0.58632	0.38846	0.34393	0.30556
0	0.24939	0.27574	0.45277	0.52499	0.0896	0.22222
0	0.32274	0.21507	0.63138	0.40958	0.43353	0.33333
0	0.50367	0.24081	0.50217	0.45647	0.28324	0.47222
0	0.40098	0.1875	0.53366	0.42968	0.31503	0.33333
[truncated: 7,430 more rows]
