# Supplementary material for: Regulating microbiome metabolic stability for stable indigenous liquor fermentation
Source: bioRxiv preprint, doi:10.1101/2023.04.21.537800, version 1 (2023-04-21)
Supplement: supplementary dataset 5 [file 537800_file15.xlsx]

## Sheet: Fungi expression mapping
geneID	MEAN of batch A	SD	MEAN of batch B	SD	KEGG_annotation		KEGG_annotation of main metabolic functions	SUM of expression in batch A	SUM of expression in batch B	Fold Change	Weighted overexpression level	Constrain weight for drawing
mix_10006_1	0	0	0	0	K03006		K03006	247.188	144.977	0.76979	1.50942	1.50942
mix_1000_1	17.395	13.1183	0.503333	0.491144	K14558		K14558	66.5433	50.585	0.395584	0.231671	0.231671
mix_10011_1	30.0633	21.2277	0.758333	0.821876	K03006		K07512	122.595	117.138	0.0656869	0.0787367	0.0787367
mix_1001_1	0.916667	2.04973	0	0	K07512		K02260	185.983	64.1983	1.53457	1.9196	1.9196
mix_10022_1	185.983	415.871	64.1983	143.552	K02260		K08658	26.69	22.695	0.233925	0.0577619	0.0577619
mix_10024_1	3.18833	2.28581	4.85333	5.5884	K08658		K00560	39.1167	16.615	1.2353	0.344226	0.344226
mix_10026_2	7.99667	4.96823	8.99	9.14768	K08658		K11582	13.9233	12.2633	0.183153	0.0239809	0.0239809
mix_10027_1	6.26833	6.67877	1.91333	2.19383	K00560		K01641	267.582	162.062	0.723436	1.5541	1.5541
mix_10028_1	11.5017	12.53	9.335	9.19778	K00560		K03253	344.685	161.585	1.09299	2.76673	2.76673
mix_10029_1	7.17333	6.67387	5.03833	4.94475	K00560		K13239	29.0783	37.4483	-0.364957	0.121397	0.121397
mix_10029_2	8.52	6.30497	9.35667	9.4913	K11582		K01689	6206.9	4018.09	0.627363	32.0739	30
mix_1002_1	0.238333	0.53293	1.27833	2.85844	K01641		K03386	652.362	677.815	-0.0552196	0.367259	0.367259
mix_10035_1	0.433333	0.548989	3.25833	5.65743	K03253		K12860	37.075	18.7567	0.983043	0.274425	0.274425
mix_10038_1	7.48833	4.30132	10.8717	9.14449	K13239		K01530	191.73	96.27	0.993918	1.43124	1.43124
mix_10039_1	4.06167	2.55882	1.92333	2.09268	K13239		K11682	42.6067	36.8467	0.209545	0.0832453	0.0832453
mix_1003_1	0	0	0.513333	1.14785	K01641		K06942	43.3133	19.1383	1.17835	0.367948	0.367948
mix_10060_1	0.131667	0.188893	19.7467	17.0288	K01689		K01738	130.578	47.76	1.45104	1.29388	1.29388
mix_10062_1	3.88167	5.95112	11.3567	17.3244	K03386		K06067	56.0167	15.675	1.83739	0.658628	0.658628
mix_10063_1	1.42833	2.04523	1.01833	1.46711	K12860		K11880	38.0233	39.955	-0.071491	0.0278738	0.0278738
mix_10064_1	4.21333	3.0227	3.39667	2.70447	K12860		K09184	123.203	60.7967	1.01898	0.937459	0.937459
mix_10067_1	0	0	1.70833	3.81995	K01530		K14772	124.962	89.97	0.47397	0.509355	0.509355
mix_10069_2	19.195	12.6849	21.4967	17.6103	K11682		K13179	247.175	160.495	0.623004	1.2699	1.2699
mix_10078_1	28.8183	16.5623	18.2883	15.2549	K06942		K14794	170.295	92.7283	0.876954	1.1533	1.1533
mix_1007_1	54.0033	42.6518	2.02333	2.86893	K01738		K14171	720.127	743.155	-0.0454125	0.332256	0.332256
mix_1007_2	0	0	0	0	K06067		K09550	12.1517	1.32333	3.19891	0.215526	0.215526
mix_10080_1	24.8433	13.6736	28.8833	29.4531	K11880		K02969	2337.75	791.388	1.56267	24.449	24.449
mix_10081_1	13.18	9.05073	11.0717	12.8159	K11880		K06062	13.8017	5.365	1.36319	0.130639	0.130639
mix_10083_1	7.65333	5.32298	6.5	6.25962	K09184		K02962	1705.06	385.378	2.14548	22.425	22.425
mix_10084_1	10.0467	7.70819	9.65	7.48068	K09184		K01497	89.1967	51.9683	0.779357	0.55009	0.55009
mix_10089_1	0.656667	0.729901	3.18167	5.38528	K14772		K02934	3190.03	1430.55	1.157	26.73	26.73
mix_10097_1	0.471667	1.05468	5.465	10.7593	K13179		K18738	149.615	49.135	1.60643	1.59639	1.59639
mix_1009_1	2.01833	2.46639	0	0	K14794		K03809	442.488	309.855	0.514046	1.9337	1.9337
mix_10100_1	1.72667	2.27679	15.8	22.5613	K14171		K08192	67.8383	33.1233	1.03425	0.522099	0.522099
mix_10103_2	0	0	0	0	K09550		K08502	12.5067	9.85667	0.343526	0.0384119	0.0384119
mix_10104_2	0.99	1.6024	1.32333	1.52723	K09550		K18588	22.215	16.7	0.411686	0.0801038	0.0801038
mix_10106_1	7.31167	13.486	13.8033	30.8652	K02969		K03113	941.402	735.417	0.356249	2.98682	2.98682
mix_10107_1	0.848333	1.89693	8.08667	12.8529	K02969		K13333	1726.46	1107.35	0.640708	9.07819	9.07819
mix_10108_1	1118.95	792.858	740.295	681.704	K02969		K12820	93.3167	54.73	0.769803	0.569834	0.569834
mix_1010_1	4.22167	2.60502	0	0	K06062		K11373	105.452	78.78	0.420681	0.387513	0.387513
mix_10110_1	698.082	366.898	352.785	291.013	K02962		K02880	1094.12	326.5	1.74461	12.3922	12.3922
mix_10111_1	11.49	19.5443	0	0	K02962		K03234	5091.28	2217.66	1.19899	43.8168	30
mix_10112_2	5.93667	3.27006	5.38	5.26799	K01497		K15453	11.2633	8.28167	0.443641	0.0433548	0.0433548
mix_10113_1	49.8083	15.2082	44.235	36.4531	K01497		K17782	41.4267	29.6533	0.482365	0.171433	0.171433
mix_10119_1	1186.54	756.111	590.113	602.47	K02934		K17918	38.6817	16.1967	1.25595	0.344623	0.344623
mix_1011_1	91.2133	60.5872	2.295	2.04367	K18738		K12772	13.7233	6.37	1.10727	0.111243	0.111243
mix_10123_1	31.3933	20.011	24.1967	25.1666	K03809		K01873	265.583	137.477	0.949978	1.91449	1.91449
mix_10124_1	12.985	5.29542	9.105	8.80071	K08192		K03538	31.7833	22.855	0.475761	0.129974	0.129974
mix_1013_1	3.83667	3.59147	0.383333	0.857159	K08502		K14969	21.4183	21.5483	-0.00873007	0.00187551	0.00187551
mix_10141_1	13.2817	11.7727	16.3583	17.2333	K18588		K12870	2.56	1.20333	1.08911	0.0204934	0.0204934
mix_10149_1	0	0	3.42	3.96636	K03113		K01501	40.2633	10.065	2.00012	0.503313	0.503313
mix_10157_1	11.795	7.02988	0.595	0.883322	K13333		K14815	284.745	159.728	0.83405	1.85357	1.85357
mix_10159_1	0.875	1.55944	2.42833	4.25624	K12820		K02272	1851.78	1247.05	0.570393	8.83776	8.83776
mix_1015_1	10.8367	7.52383	0.203333	0.300315	K11373		K10729	20.0733	8.25	1.28281	0.181668	0.181668
mix_10160_1	0	0	4.20667	7.32767	K12820		K19985	36.6733	24.885	0.559455	0.172196	0.172196
mix_10164_1	315.23	192.869	7.81333	9.51955	K02880		K07739	108.328	60.88	0.83137	0.703374	0.703374
mix_10165_1	200.248	134.082	6.24167	8.4497	K02880		K18724	50.9	33.4733	0.604653	0.255083	0.255083
mix_10168_1	1973.64	1221.64	945.505	761.243	K03234		K14844	98.065	61.315	0.677498	0.539898	0.539898
mix_10173_1	6.32833	3.96245	3.84333	3.63686	K15453		K10967	514.092	307.752	0.740259	3.04188	3.04188
mix_10174_1	4.935	3.9768	4.43833	3.67579	K15453		K02152	12.075	2.395	2.33393	0.16886	0.16886
mix_10175_1	12.0017	4.84944	10.7717	8.48754	K17782		K07126	124.028	71.7817	0.788982	0.772453	0.772453
mix_10176_1	24.11	14.2169	15.2783	11.7089	K17782		K02183	168.33	89.005	0.919334	1.18288	1.18288
mix_10177_2	13.3667	7.66034	11.47	9.28584	K17918		K14050	17.0633	12.8067	0.414004	0.0618316	0.0618316
mix_10179_1	9.275	5.69604	4.72667	3.9865	K17918		K14763	51.605	22.2583	1.21317	0.448042	0.448042
mix_10180_1	3.34833	3.43241	2.13833	2.48466	K12772		K15053	32.5533	6.76333	2.267	0.445654	0.445654
mix_10181_1	5.88333	4.95122	3.72	4.08614	K12772		K17417	173.383	110.548	0.649288	0.921767	0.921767
mix_10183_1	0.805	1.26746	3.34833	5.311	K01873		K03002	240.108	132.975	0.85253	1.59032	1.59032
mix_10188_1	11.7083	7.71805	12.3033	10.9944	K03538		K04508	45.9383	15.755	1.54389	0.476238	0.476238
mix_10189_2	8.72833	6.79972	13.3067	18.801	K14969		K03358	24.205	21.225	0.189541	0.0430541	0.0430541
mix_10191_1	13.0533	10.2452	10.5517	11.1413	K03538		K01872	170.487	111.46	0.613133	0.864354	0.864354
mix_10192_1	1.06	1.32221	1.20333	1.29195	K12870		K04564	484.372	301.525	0.683837	2.68713	2.68713
mix_10195_1	2.82833	2.31713	2.75167	2.18506	K01501		K07208	49.8067	18.665	1.416	0.484781	0.484781
mix_10197_1	0.576667	1.28947	5.04333	9.92728	K14815		K17741	455.147	552.268	-0.279038	1.40553	1.40553
mix_10198_1	671.193	427.914	587.752	670.698	K02272		K01507	638.707	313.828	1.02518	4.88259	4.88259
mix_10199_1	951.178	645.262	659.3	662.501	K02272		K02544	3.83333	4.92167	-0.360547	0.015783	0.015783
mix_101_1	7.72833	6.43363	0.303333	0.517064	K10729		K02931	76.9217	46.8867	0.714212	0.442127	0.442127
mix_10201_1	16.045	11.754	8.7	9.22168	K19985		K20176	42.09	1.24	5.08507	1.10168	1.10168
mix_1020_1	1.24167	2.77645	1.20833	2.70192	K07739		K09140	9.55833	6.39	0.580943	0.0463254	0.0463254
mix_10215_1	15.6783	8.88672	13.9883	12.9331	K18724		K07955	14.6267	7.95	0.879574	0.0992893	0.0992893
mix_10217_1	21.3667	11.2186	19.3067	18.4875	K18724		K14808	97.8933	56.56	0.791428	0.611194	0.611194
mix_1021_1	0.485	1.08449	2.48667	5.56036	K14844		K13348	37.73	37.025	0.0272124	0.0101713	0.0101713
mix_10225_1	0.125	0.279508	2.62333	4.5259	K10967		K17759	64.1	45.4	0.497632	0.272454	0.272454
mix_10226_1	0.35	0.534634	2.75	4.87105	K10967		K13337	14.9467	14.5667	0.037153	0.00548254	0.00548254
mix_10227_1	0	0	0.315	0.704361	K02152		K02896	1214.64	479.363	1.34134	11.3612	11.3612
mix_10228_1	0.745	1.66587	2.08	3.5819	K02152		K16261	1434.61	971.013	0.563097	6.773	6.773
mix_10230_1	13.9633	9.31731	7.92667	6.68587	K07126		K05542	48.27	26.58	0.860786	0.322149	0.322149
mix_10233_1	8.21	3.89504	3.40667	2.48866	K07126		K20472	135.547	58.0717	1.22288	1.18386	1.18386
mix_10234_2	2.97167	6.64485	0.195	0.436033	K02183		K07975	383.992	237.598	0.69255	2.15241	2.15241
mix_10236_1	6.03667	4.24827	4.01833	3.80121	K14050		K11673	44.0333	27.4517	0.681702	0.243657	0.243657
mix_10237_1	7.86167	6.41365	8.78833	7.81265	K14050		K11254	725.185	302.892	1.25955	6.47456	6.47456
mix_10241_1	0.103333	0.23106	0	0	K14763		K19788	260.16	167.392	0.636171	1.35998	1.35998
mix_10244_1	23.3183	10.497	14.26	13.2824	K14763		K03235	4504.23	2261.4	0.994066	33.6274	30
mix_10248_1	15.74	9.34086	7.44833	7.83527	K14763		K05663	52.8567	30.415	0.797302	0.331964	0.331964
mix_1024_1	7.44	7.73056	0	0	K15053		K14793	132.853	60.1517	1.14316	1.10318	1.10318
mix_10256_1	67.6383	38.0426	34.6533	33.6767	K17417		K12598	120.665	57.4383	1.07092	0.953673	0.953673
mix_10257_1	98.335	68.2573	75.895	82.2243	K17417		K14828	102.197	56.1283	0.864547	0.684397	0.684397
mix_1025_1	0	0	4.27833	5.61658	K03002		K09291	164.843	47.8217	1.78536	1.89842	1.89842
mix_10267_1	9.335	7.28766	7.46	6.33932	K04508		K11883	139.75	68.3	1.03289	1.07446	1.07446
mix_10268_1	4.40167	2.4818	2.79167	2.88887	K04508		K15334	118.247	68.2533	0.792828	0.739312	0.739312
mix_10269_1	7.51	5.94088	4.47667	3.826	K04508		K14288	66.5267	46.935	0.503269	0.285508	0.285508
mix_1026_1	0	0	0	0	K03358		K10838	55.31	12.37	2.16069	0.731179	0.731179
mix_10273_1	0.703333	1.32264	2.815	5.17433	K01872		K11252	982.17	503.92	0.962778	7.15387	7.15387
mix_10279_1	54.1233	29.8837	38.0283	34.8746	K04564		K08332	68.685	49.8967	0.461052	0.273361	0.273361
mix_1027_1	5.85833	10.8241	0	0	K03358		K07359	63.9567	19.645	1.70293	0.71184	0.71184
mix_10280_1	20.8683	8.4369	21.8417	18.5901	K04564		K02942	1548.25	653.222	1.24499	13.704	13.704
mix_10281_1	26.0567	11.2473	18.2883	18.1725	K07208		K02943	2074.41	808.522	1.35934	19.5945	19.5945
mix_10284_4	0	0	0	0	K17741		K14767	74.9933	31.2433	1.26321	0.670998	0.670998
mix_10289_1	0.568333	0.829466	1.30167	1.61591	K01507		K12782	5.77667	6.43333	-0.155329	0.00948285	0.00948285
mix_1028_1	1.37	3.06341	3.79833	5.89917	K13333		K12821	51.6733	19.17	1.43057	0.506732	0.506732
mix_10290_1	4.305	2.45225	1.92333	2.2388	K01507		K13280	46.6617	28.6283	0.704794	0.26532	0.26532
mix_10293_1	0.286667	0.641006	5.325	7.92664	K03253		K14810	143.038	81.6533	0.808818	0.908673	0.908673
mix_10296_1	3.11667	1.74324	3.99333	4.30722	K02544		K15193	28.4167	6.09	2.22222	0.383408	0.383408
mix_1029_1	2.76667	2.80329	0.97	2.16899	K02931		K01647	697.438	612.327	0.187764	1.22963	1.22963
mix_102_1	42.09	29.6868	1.24	1.99891	K20176		K06674	102.115	63.7467	0.679773	0.563741	0.563741
mix_10300_1	7.12833	4.79699	4.51667	4.11211	K09140		K14833	134.262	66.1367	1.02153	1.02356	1.02356
mix_10301_1	2.43	2.01021	1.87333	2.77841	K09140		K14832	89.6617	55.6833	0.687246	0.499439	0.499439
mix_10309_1	2.28667	2.26703	1.43833	1.55093	K07955		K10773	16.4617	11.72	0.490138	0.0690645	0.0690645
mix_10320_1	10.235	5.31049	8.47667	6.58907	K14808		K03456	93.7733	55.5167	0.756257	0.564508	0.564508
mix_10321_1	9.89333	7.15504	11.6367	12.4338	K14808		K06867	299.72	182.088	0.718977	1.73205	1.73205
mix_10324_1	0.966667	1.37593	1.79333	2.26565	K13348		K07560	12.65	8.205	0.624562	0.0651262	0.0651262
mix_10330_1	36.8117	24.9648	45.0833	49.6645	K17759		K20361	51.1183	31.69	0.689813	0.285611	0.285611
mix_10332_1	4.40833	2.94867	4.14	4.06018	K13337		K19245	63.52	33.255	0.93364	0.451765	0.451765
mix_10333_1	7.25333	4.71022	5.67833	6.24536	K13337		K03134	36.9383	21.1883	0.801849	0.233044	0.233044
mix_10338_1	200.47	148.412	7.51	7.89004	K02896		K05284	34.895	19.145	0.866053	0.234007	0.234007
mix_10339_1	242.382	162.571	5.66833	7.82219	K02896		K16230	2145.47	1925.04	0.156406	3.18327	3.18327
mix_1033_1	3.55167	5.14681	0	0	K16261		K03009	415.657	326.702	0.347419	1.28955	1.28955
mix_10340_1	16.8567	10.9173	17.3583	18.3447	K05542		K17780	109.08	96.2417	0.180653	0.18546	0.18546
mix_10341_1	12.05	5.80888	9.04667	7.70874	K05542		K01760	97.585	119.965	-0.297882	0.324021	0.324021
mix_10344_1	23.3833	14.0999	14.6717	11.8239	K20472		K17617	49.9467	6.08	3.03825	0.851114	0.851114
mix_10345_1	62.9733	42.2503	42.5017	42.2052	K20472		K14792	198.947	126.278	0.655775	1.06637	1.06637
mix_10346_1	44.9767	29.0416	16.4867	13.057	K07975		K06072	75.635	54.9267	0.461547	0.301302	0.301302
mix_1034_1	6.07667	5.55441	0.126667	0.179505	K11673		K11548	7.365	4.65667	0.661388	0.0397549	0.0397549
mix_10350_2	100.13	91.7847	9.87	11.1318	K11254		K08912	17.4383	8.38167	1.05695	0.136453	0.136453
mix_10352_1	163.455	131.919	3.77833	5.80629	K11254		K14775	71.1967	29.2967	1.28107	0.643697	0.643697
mix_10355_1	1.24	1.53899	7.53667	11.6439	K19788		K08734	23.9	11.8517	1.01192	0.180889	0.180889
mix_1035_1	2.56333	3.43949	0.286667	0.529518	K03235		K11128	191.233	96.7717	0.982677	1.41508	1.41508
mix_1036_1	4.555	3.39571	0.308333	0.44894	K05663		K00390	91.07	65.48	0.475922	0.372528	0.372528
mix_10371_1	63.4867	42.4216	28.005	23.7412	K14793		K02951	1399.2	712.96	0.972709	10.2726	10.2726
mix_10375_1	0.755	1.68823	2.92667	5.47968	K12598		K15444	25.5733	16.68	0.616521	0.13025	0.13025
mix_10376_1	0.113333	0.253421	3.35	5.99048	K14828		K17553	47.8517	17.8583	1.42197	0.467189	0.467189
mix_1037_1	7.21667	6.11785	0	0	K05663		K14309	138.87	82.315	0.754508	0.834429	0.834429
mix_10381_1	11.0933	5.9611	6.69333	5.7268	K09291		K03261	92.985	82.39	0.174529	0.15304	0.15304
mix_10382_1	25.8633	16.9	16.5433	12.5215	K09291		K07562	170.652	95.8583	0.832079	1.10879	1.10879
mix_10385_1	12.7117	7.62692	11.105	12.1354	K11883		K13993	3417.15	4306.65	-0.333776	12.8901	12.8901
mix_10386_1	27.045	15.7685	18.8033	16.2404	K11883		K20368	557.757	409.012	0.447494	2.16311	2.16311
mix_10388_1	0.786667	1.47977	3.41	5.92425	K15334		K03246	406.37	203.605	0.997021	3.04079	3.04079
mix_1038_1	0	0	2.39	5.3442	K14288		K06694	15.975	23.275	-0.542965	0.106557	0.106557
mix_10390_1	0	0	0	0	K10838		K03540	13.7833	11.1483	0.306097	0.0381575	0.0381575
mix_10392_1	6.73	5.14496	3.975	3.91886	K10838		K18736	79.245	47.4117	0.741078	0.469312	0.469312
mix_10393_1	4.82	3.56205	2.50833	2.86395	K10838		K10573	120.285	69.4233	0.792964	0.75216	0.75216
mix_10394_1	450.713	204.547	340.9	343.776	K11252		K14824	130.887	70.7967	0.886565	0.894027	0.894027
mix_10397_1	0	0	0	0	K08332		K00134	15442.3	13351.3	0.209903	30.2192	30
mix_10401_1	18.7717	13.1897	0.305	0.305273	K08332		K00772	167.417	119.187	0.49022	0.702494	0.702494
mix_1040_1	35.6983	25.4665	0.77	1.0173	K07359		K00759	121.967	84.505	0.529378	0.546508	0.546508
mix_10410_1	85.4967	73.5265	0.97	2.16899	K02942		K02912	1711.73	841.085	1.02513	13.0848	13.0848
mix_10411_1	50.5017	69.1374	1.38333	2.18873	K02943		K07750	789.205	557.835	0.500562	3.37138	3.37138
mix_10412_2	427.35	268.622	8.55333	8.3223	K02943		K03138	45.7383	21.8967	1.06269	0.359376	0.359376
mix_10414_1	9.30667	5.75891	4.27	4.40148	K14767		K01890	153.96	82.2133	0.905111	1.06882	1.06882
mix_10416_1	1.44	1.49741	0.773333	0.884565	K12782		K00861	36.82	36.245	0.0227076	0.00829567	0.00829567
mix_10416_2	2.98	3.54353	3.24	3.12178	K12782		K18723	40.6817	26.4517	0.62102	0.208456	0.208456
mix_10421_1	19.2733	9.77761	12.9367	10.2631	K12821		K08157	368.05	232.595	0.662082	1.98838	1.98838
mix_10421_2	10.4383	7.49638	12.09	11.3769	K13280		K02995	2138.86	729.288	1.55228	22.2609	22.2609
mix_10422_1	18.8383	12.3176	15.6783	14.5823	K13280		K12471	245.882	98.98	1.31276	2.26359	2.26359
mix_1042_1	12.905	10.6321	0.218333	0.349877	K14810		K13126	623.345	243.012	1.35901	5.88692	5.88692
mix_10434_3	3.60167	3.85512	2.33667	2.97095	K15193		K16365	150.27	85.075	0.82075	0.965797	0.965797
mix_10435_1	2.765	2.45039	4.16167	3.79272	K10838		K01194	91.8983	74.435	0.304058	0.252875	0.252875
mix_10438_1	0.618333	0.541677	0.305	0.493415	K10838		K02149	47.7183	30.6683	0.637794	0.249973	0.249973
mix_1043_3	51.9317	38.4586	1.49	2.36504	K01647		K00416	147.658	65.4233	1.17439	1.2512	1.2512
mix_10448_1	10.0933	6.24727	7.05	6.09901	K06674		K18752	32.1217	0.736667	5.44639	0.894797	0.894797
mix_10449_1	3.84667	2.77325	3.17833	2.60664	K06674		K14264	305.357	357.965	-0.229323	0.760575	0.760575
mix_10450_1	0.746667	1.24327	4.795	9.14021	K14833		K02537	110.133	11.18	3.30026	2.00183	2.00183
mix_10455_1	0.511667	0.782313	3.91667	7.95516	K14832		K14786	48.53	11.71	2.05114	0.617802	0.617802
mix_10456_1	8.205	5.74436	6.83667	6.96705	K10773		K18328	13.9967	10.9533	0.353713	0.0441257	0.0441257
mix_10456_2	11.74	16.7765	3.50667	7.84115	K03456		K03648	21.835	10.8267	1.01205	0.165277	0.165277
mix_10458_1	3.08333	1.61181	4.75667	4.25636	K10773		K14826	220.685	109.097	1.01638	1.67592	1.67592
mix_10463_1	3.71333	5.41532	0	0	K06867		K19786	34.48	15.4817	1.1552	0.288578	0.288578
mix_10467_1	12.65	6.74341	8.205	7.78898	K07560		K07151	205.312	90.8567	1.17615	1.74169	1.74169
mix_10471_1	1.22	2.03224	3.17167	3.21855	K20361		K13728	3.325	0.13	4.67677	0.0807912	0.0807912
mix_1047_1	1.35333	1.48288	1.14667	1.62897	K19245		K02140	230.552	125.845	0.873442	1.55646	1.55646
mix_10494_1	26.1767	16.1	21.0633	15.9692	K03134		K14779	103.737	42.0617	1.30235	0.949401	0.949401
mix_104_1	8.875	6.339	0.19	0.265581	K05284		K02126	2254.23	759.907	1.56874	23.6419	23.6419
mix_10506_1	0.326667	0.358267	25.83	23.5385	K16230		K09658	1e-08	1e-08	0	0	0
mix_10507_1	0	0	0	0	K03009		K11129	110.432	58.955	0.905468	0.766871	0.766871
mix_1050_1	0	0	0	0	K17780		K00237	548.728	345.328	0.668123	2.9867	2.9867
mix_10512_1	1.59667	0.799493	2.36667	2.02301	K01760		K11556	28.3367	24.8683	0.18836	0.0501085	0.0501085
mix_10513_1	1.515	1.15104	2.64	3.59078	K01760		K06963	14.7383	15.63	-0.0847444	0.0128677	0.0128677
mix_10516_2	3.54833	3.54474	4.43167	3.57607	K17617		K11547	74.7583	25.6183	1.54506	0.775439	0.775439
mix_10517_1	0.625	1.09687	6.49167	10.8252	K14792		K14837	54.4317	34.345	0.664346	0.294892	0.294892
mix_10518_1	0.638333	0.918303	9.93167	14.5256	K06072		K18849	31.215	14.83	1.07372	0.247197	0.247197
mix_1051_1	0.558333	1.24847	0	0	K17780		K14805	49.265	47.3383	0.0575541	0.0277996	0.0277996
mix_10521_1	3.85	3.06308	3.415	3.97402	K11548		K14543	57.345	43.995	0.382328	0.193726	0.193726
mix_10523_1	2.36167	1.5544	1.24167	1.64961	K11548		K03678	43.545	23.5733	0.885351	0.297117	0.297117
mix_10528_1	5.52	8.00643	3.00667	5.24202	K08912		K17437	152.552	119.007	0.358256	0.486436	0.486436
mix_10530_1	0	0	2.56	5.72433	K08912		K00938	29.4333	11.5833	1.3454	0.275919	0.275919
mix_10532_1	2.10667	1.83226	2.425	2.76898	K14775		K15174	39.0683	20.5083	0.929789	0.276969	0.276969
mix_10533_1	30.48	21.3012	25.8183	26.749	K14775		K03263	2090.58	973.845	1.10214	16.8871	16.8871
mix_10539_1	7.41167	3.18507	4.63833	4.40317	K08734		K15306	184.642	102.23	0.85291	1.22338	1.22338
mix_10541_1	150.883	68.1655	85.1433	79.0654	K11128		K00873	1556.75	1219.47	0.352289	4.89015	4.89015
mix_10544_1	63.5183	36.8005	61.4667	54.6628	K00390		K13093	11.1083	3.81667	1.54126	0.115016	0.115016
mix_10555_1	0.168333	0.376405	13.3867	20.1224	K02951		K12819	32.5633	20.3317	0.67952	0.179716	0.179716
mix_10556_1	1110.96	800.998	666.273	717.824	K02951		K14849	34.5483	31.4617	0.135021	0.0445637	0.0445637
mix_10558_1	10.3567	8.29864	6.25833	5.36338	K15444		K05275	150.058	30.695	2.28945	2.06913	2.06913
mix_10560_1	13.73	8.94878	10.4217	10.477	K15444		K08336	11.84	12.2517	-0.0493089	0.00593967	0.00593967
mix_10563_2	7.04167	3.485	6.14333	8.46509	K17553		K11570	14.785	10.6017	0.479843	0.0609081	0.0609081
mix_10563_3	65.195	47.9237	43.94	45.6533	K14309		K14403	59.26	26.2317	1.17575	0.502584	0.502584
mix_10564_1	10.0117	9.16266	11.4583	10.4514	K17553		K02830	9.24333	5.71667	0.693239	0.0518543	0.0518543
mix_10566_1	92.985	51.2444	78.8733	66.3915	K03261		K00008	5.93833	1.17167	2.3415	0.0832402	0.0832402
mix_10569_1	0.403333	0.702416	6.54667	10.572	K07562		K02937	1558.69	654.253	1.25241	13.8576	13.8576
mix_10574_1	68.9333	28.8611	77.5483	75.2291	K13993		K10742	25.9683	15.01	0.790829	0.162034	0.162034
mix_10575_1	68.055	35.5119	89.615	87.5795	K13993		K11672	43.95	27.915	0.654823	0.235294	0.235294
mix_10577_2	510.115	331.446	408.792	415.816	K20368		K07889	288.11	177.552	0.698381	1.62605	1.62605
mix_10578_1	0.26	0.581378	7.035	10.5861	K03246		K03860	28.615	17.9717	0.671047	0.156309	0.156309
mix_10584_1	8.01833	6.70352	10.5833	12.761	K06694		K01602	10.4417	6.84667	0.608878	0.0526325	0.0526325
mix_10585_1	7.95667	5.54066	12.6917	14.523	K06694		K15177	64.8567	33.96	0.933418	0.461186	0.461186
mix_10586_2	8.79	7.9577	8.8	10.6694	K03540		K01426	34.5333	28.4433	0.279899	0.0881355	0.0881355
mix_10587_2	1.32167	2.95534	2.34833	3.3452	K03540		K06174	322.927	165.567	0.963794	2.35404	2.35404
mix_10591_1	38.0883	26.9992	25.2217	25.6142	K18736		K06877	40.59	30.1867	0.427213	0.151184	0.151184
mix_10592_1	41.1567	32.0519	22.19	25.8685	K18736		K10971	46.6117	0.581667	6.32435	1.49234	1.49234
mix_10593_2	83.37	40.5355	68.3383	55.6067	K10573		K14998	9.475	7.01833	0.432997	0.0357079	0.0357079
mix_10601_1	0.221667	0.495662	5.13667	7.94901	K14824		K07513	33.0283	21.43	0.624072	0.16993	0.16993
mix_10603_1	0.475	1.06213	0.676667	1.09169	K00134		K15278	7.06167	1e-08	29.3954	1.0379	1.0379
mix_10604_1	24.845	28.4949	11.3483	14.0019	K00134		K11677	21.8717	12.9983	0.750737	0.130891	0.130891
mix_10605_1	4.3	6.82062	10.3867	12.461	K02896		K08505	49.7867	24.9183	0.998552	0.372984	0.372984
mix_10606_1	47.855	33.1823	35.4133	30.741	K02896		K14857	281.91	163.467	0.786238	1.75086	1.75086
mix_10608_1	70.5917	40.026	52.32	45.5121	K00772		K14526	5.72333	7.48	-0.386183	0.0254945	0.0254945
mix_10609_1	86.8567	42.7882	55.2417	44.6603	K00772		K01230	63.96	43.7467	0.547997	0.295115	0.295115
mix_1060_1	90.8483	68.7395	3.12167	3.8759	K03253		K12199	18.59	18.2233	0.0287399	0.00529006	0.00529006
mix_10610_1	1.27667	2.85471	7.18333	10.3162	K00759		K01187	50.2983	0.766667	6.03577	1.54108	1.54108
mix_10614_1	11.7633	22.4837	51.8733	74.2364	K02912		K00295	65.2983	53.05	0.299693	0.177341	0.177341
mix_10617_1	1.93	3.52734	14.8867	26.547	K07750		K01895	779.225	592.845	0.394385	2.70562	2.70562
mix_1061_1	6.46	5.44338	0.305	0.434118	K03138		K00550	128.753	94.7783	0.441981	0.493983	0.493983
mix_10628_1	0.943333	1.34359	4.23667	7.40816	K01890		K00948	492.117	330.237	0.5755	2.36632	2.36632
mix_10629_1	7.57667	5.61728	6.845	6.02548	K00861		K17428	61.45	35.535	0.790172	0.383174	0.383174
mix_10630_1	9.72667	6.88483	8.03	9.25466	K18723		K08991	32.1967	13.79	1.22329	0.281275	0.281275
mix_10631_1	11.3733	7.6643	7.18667	6.44034	K18723		K20047	283.542	134.558	1.07533	2.24798	2.24798
mix_10632_1	22.6417	13.4901	29.4	26.3073	K00861		K17278	60.2883	29.08	1.05185	0.470011	0.470011
mix_1063_1	0	0	0	0	K08157		K01127	29.3967	30.8617	-0.0701634	0.0211396	0.0211396
mix_10648_1	458.485	266.336	10.2133	13.4901	K02995		K09228	178.805	152.878	0.226003	0.374807	0.374807
mix_10649_1	235.04	155.994	6.01167	7.16772	K02995		K05543	80.7233	57.0217	0.501476	0.345379	0.345379
mix_10651_1	25.0383	12.3586	21.4683	19.7212	K12471		K02146	175.12	122.25	0.518509	0.770946	0.770946
mix_10651_2	0	0	0	0	K12471		K13205	45.5133	32.7233	0.47597	0.186191	0.186191
mix_10653_1	28.2483	10.8745	19.8117	19.4739	K12471		K15262	63.85	20.9967	1.60453	0.680694	0.680694
mix_10654_1	5.30833	5.04265	0	0	K01689		K01336	437.772	300.773	0.541502	1.99962	1.99962
mix_10655_1	0	0	4.10333	5.80464	K01689		K02914	100.088	109.38	-0.128075	0.134138	0.134138
mix_10656_1	0.506667	1.13294	13.76	11.8573	K01689		K02627	11.19	2.50167	2.16125	0.147955	0.147955
mix_10660_1	19.03	11.9135	21.3067	19.1391	K07975		K12275	125.557	64.0667	0.970693	0.92033	0.92033
mix_10661_1	17.2867	8.18729	13.905	12.3945	K07975		K03254	296.938	142.273	1.0615	2.33111	2.33111
mix_10664_1	0.513333	0.858034	3.57833	6.93573	K13126		K19861	4.16833	0.661667	2.65529	0.0641254	0.0641254
mix_10666_1	53.565	28.6473	37.4633	30.331	K16365		K15902	23.1367	25.675	-0.150183	0.0366535	0.0366535
mix_10667_1	60.4467	30.6456	40.9683	34.0123	K16365		K02946	104.892	83.365	0.331386	0.311928	0.311928
mix_1067_1	0	0	0	0	K01194		K17968	125.97	148.633	-0.238678	0.327708	0.327708
mix_10683_1	6.70833	10.204	30.7017	55.3956	K03235		K03949	1.4	0.105	3.73697	0.0281207	0.0281207
mix_10686_1	41.3383	25.4086	30.6683	27.1074	K02149		K14407	64.5983	37.5533	0.782556	0.399697	0.399697
mix_10692_1	5.72	9.56957	24.1267	37.0162	K02896		K05916	578.848	554.665	0.0615687	0.348945	0.348945
mix_10693_1	630.992	420.77	364.658	354.612	K02896		K14766	205.962	65.4317	1.65431	2.24485	2.24485
mix_10698_1	99.01	62.7291	57.0583	56.6441	K00416		K09503	648.502	592.597	0.13006	0.807085	0.807085
mix_10700_1	19.1717	18.8834	7.32833	7.85128	K00416		K10949	180.512	96.565	0.90252	1.25034	1.25034
mix_1071_1	32.1217	22.2548	0.736667	0.569083	K18752		K10746	29.9533	5.84333	2.35785	0.422016	0.422016
mix_10720_1	134.287	91.1726	149.773	173.676	K14264		K17773	1e-08	1e-08	0	0	0
mix_10722_2	159.588	102.602	207.953	228.268	K14264		K17868	37.0633	7.47833	2.3092	0.514279	0.514279
mix_10723_1	14.435	9.76466	12.8933	13.4908	K17741		K11314	38.39	17.7117	1.11603	0.313056	0.313056
mix_10724_1	17.2417	10.6371	12.1817	10.3956	K17741		K18713	27.02	18.6967	0.531247	0.121434	0.121434
mix_10736_1	8.17833	5.57596	6.985	6.53338	K02537		K03355	22.215	8.59167	1.37052	0.211106	0.211106
mix_10737_1	8.21	5.94585	4.195	3.416	K02537		K14780	62.5517	60.8783	0.0391195	0.0241426	0.0241426
mix_1073_1	10.8317	6.18593	5.585	4.12077	K14786		K08517	48.4117	23.0567	1.07017	0.382417	0.382417
mix_10756_1	3.29667	1.23211	4.45833	5.71047	K18328		K02917	1139.86	185.628	2.61837	17.3531	17.3531
mix_10757_1	3.73833	2.07292	5.76833	6.38244	K18328		K01535	1311.85	585.833	1.16304	11.0354	11.0354
mix_10760_1	279.593	185.819	309.362	284.457	K07750		K03140	45.0283	29.0233	0.63362	0.234603	0.234603
mix_10766_1	7.64667	5.07733	4.00167	3.73263	K03648		K13954	31.875	18.9967	0.746679	0.189924	0.189924
mix_10767_1	7.05	5.10436	6.48167	6.10182	K03648		K17871	645.575	384.123	0.749015	3.8563	3.8563
mix_1077_1	0	0	0	0	K14826		K02989	1960.82	761.045	1.3654	18.5822	18.5822
mix_10780_2	7.35667	5.93307	8.21833	7.25853	K19786		K16912	54.0917	32.5217	0.734005	0.317873	0.317873
mix_10783_1	7.52333	5.04918	6.76167	6.39908	K19786		K13288	30.4433	22.3767	0.444131	0.117295	0.117295
mix_1078_1	61.0833	50.0943	1.295	1.36185	K07151		K16570	30.0267	12.5917	1.25378	0.267169	0.267169
mix_10790_1	0.0916667	0.204973	7.345	13.943	K00134		K11293	57.4583	30.06	0.934671	0.409004	0.409004
mix_10795_1	0	0	0	0	K13728		K09104	106.498	63.4167	0.747897	0.635395	0.635395
mix_10798_1	3.325	2.61016	0.13	0.290689	K13728		K04648	10.0217	7.325	0.452222	0.0392227	0.0392227
mix_10803_1	67.8867	25.1995	38.8783	36.3323	K02140		K10743	19.9767	7.32833	1.44676	0.197519	0.197519
mix_10803_2	3.09	4.95618	2.34333	5.23985	K14779		K09705	7.44167	7.415	0.00517908	0.000384719	0.000384719
mix_10804_1	48.7967	29.1263	25.3117	21.4401	K14779		K09613	20.1883	16.4333	0.296897	0.0543643	0.0543643
mix_10805_1	162.665	83.2269	86.9667	77.5564	K02140		K07025	20.7483	13.5267	0.617189	0.105771	0.105771
mix_10808_1	1.98167	2.45405	4.29667	4.37324	K02126		K02964	1469.07	458.135	1.68106	16.1988	16.1988
mix_1080_1	0	0	0	0	K09658		K02040	1.31667	0.193333	2.76773	0.0208963	0.0208963
mix_10814_1	82.965	30.3543	52.7983	41.3753	K11129		K15435	30.4067	19.315	0.654666	0.162755	0.162755
mix_10815_1	458.242	305.742	334.373	352.485	K00237		K14213	22.275	17.7567	0.327065	0.0654647	0.0654647
mix_1081_1	628.287	454.235	18.4433	21.6352	K03235		K02992	51.3733	49.8667	0.0429439	0.0217382	0.0217382
mix_10822_1	15.4	7.81148	15.2017	14.1836	K11556		K20222	139.027	84.9883	0.710025	0.795281	0.795281
mix_10823_1	0.533333	1.19257	0.715	1.59879	K11556		K01874	290.142	158.43	0.872912	1.95782	1.95782
mix_10824_1	0.151667	0.339137	0.256667	0.573924	K11556		K11770	51.9167	40.18	0.36972	0.17025	0.17025
mix_10825_1	12.2517	5.18193	8.695	6.9577	K11556		K17086	165.383	121.107	0.449536	0.643937	0.643937
mix_10828_1	14.7383	10.7536	15.63	12.7347	K06963		K14765	28.93	10.9567	1.40076	0.279358	0.279358
mix_10838_1	12.72	8.67561	9.54167	9.06033	K11547		K19998	39.9367	15.0433	1.40859	0.387221	0.387221
mix_10841_1	1.02	1.46042	3.87	6.47409	K14837		K04499	65.5583	41.77	0.650312	0.348985	0.348985
mix_10844_1	9.12	5.6539	7.17667	7.01369	K18849		K10866	48.91	25.6683	0.93014	0.346841	0.346841
mix_10845_1	5.01333	3.6408	1.13667	1.31469	K14805		K12669	165.425	64.2583	1.36422	1.5667	1.5667
mix_10845_2	10.2283	4.96889	7.65333	7.22557	K18849		K04705	94.43	68.3067	0.467219	0.380168	0.380168
mix_10846_1	34.0667	12.3679	23.9517	22.1677	K14543		K10858	34.1417	21.955	0.636984	0.178663	0.178663
mix_10847_1	23.2783	12.7946	20.0433	15.155	K14543		K02991	1030.86	221.487	2.21856	13.892	13.892
mix_10851_1	14.88	11.2013	12.2433	11.335	K03678		K01889	237.54	130.945	0.85921	1.58303	1.58303
mix_10853_1	19.04	11.524	11.1767	9.31806	K03678		K11594	722.103	272.782	1.40446	6.98637	6.98637
mix_10855_1	66.5817	52.5249	53.4367	55.1207	K17437		K08288	52.9133	15.91	1.7337	0.596594	0.596594
mix_10856_1	85.97	54.8937	65.57	59.5739	K17437		K02920	1856.7	589.165	1.656	20.2518	20.2518
mix_10858_1	13.1333	7.55759	5.38	4.46101	K00938		K08712	396.467	276.41	0.52039	1.75079	1.75079
mix_10859_1	7.15	5.29036	5.20667	5.26398	K00938		K08592	54.5867	41.9483	0.379935	0.183385	0.183385
mix_1085_1	12.495	7.86468	0.203333	0.365224	K15174		K03351	14.1133	5.25	1.42667	0.138125	0.138125
mix_10860_1	6.53667	5.83628	66.91	96.283	K03263		K14856	91.345	47.93	0.930397	0.647905	0.647905
mix_10861_1	0	0	16.935	20.4951	K03263		K10747	47.2867	33.6533	0.490684	0.19858	0.19858
mix_10862_1	11.6333	17.1221	2.14167	4.78891	K03263		K14820	194.163	100.992	0.943035	1.39171	1.39171
mix_10863_1	4.04667	9.04862	0.876667	1.44039	K02183		K17279	350.227	195.323	0.842425	2.29792	2.29792
mix_10868_1	135.487	67.984	97.3467	83.3628	K15306		K11095	75.5967	94.6367	-0.324077	0.275843	0.275843
mix_1086_1	3.16167	4.5602	0.54	0.557435	K00873		K14784	29.9917	15.71	0.932879	0.213171	0.213171
mix_10871_1	0.206667	0.462121	0.713333	0.800659	K13093		K20048	78.445	50.4117	0.637924	0.411004	0.411004
mix_10872_1	3.73333	4.07671	2.925	2.79282	K13093		K02966	967.933	317.02	1.61033	10.346	10.346
mix_10873_1	1.945	2.75192	0	0	K13093		K02930	1480.09	821.31	0.849681	9.77726	9.77726
mix_10874_1	3.99167	4.61892	5.84	6.84514	K12819		K01598	49.9417	55.4383	-0.15064	0.0793722	0.0793722
mix_10875_1	4.76333	3.60327	6.03167	7.10813	K12819		K07573	33.575	7.755	2.11419	0.436897	0.436897
mix_10875_2	12.87	5.79512	12.385	11.1522	K14849		K17550	37.1533	17.8583	1.05689	0.290708	0.290708
mix_10876_2	16.3367	7.9009	16.3083	13.7298	K14849		K07936	719.63	424.333	0.762057	4.35883	4.35883
mix_10878_1	28.9017	44.3098	0	0	K03234		K19323	35.285	28.6733	0.299345	0.0957282	0.0957282
mix_10879_1	420.487	310.567	9.94	11.1419	K03234		K15275	19.005	10.73	0.824729	0.122617	0.122617
mix_1087_1	100.13	67.4714	3.18833	4.41108	K05275		K17103	80.545	61.4133	0.391243	0.277701	0.277701
mix_10880_1	0.231667	0.518022	16.9667	19.7153	K03234		K02957	1448.87	509.455	1.5079	14.7648	14.7648
mix_10881_1	225.898	147.68	252.683	254.337	K03113		K09142	79.5933	36.7517	1.11484	0.648529	0.648529
mix_10883_1	667.947	370.472	479.313	422.536	K03113		K11778	24.2317	8.15667	1.57084	0.254385	0.254385
mix_10885_1	8.36	4.46804	8.92333	7.62524	K08336		K01477	57.2433	7.33333	2.96457	0.957209	0.957209
mix_10885_2	9.66667	6.91794	6.14667	8.73688	K11570		K00921	44.7583	20.72	1.11113	0.363775	0.363775
mix_10886_2	5.11833	4.05595	4.455	4.90107	K11570		K19829	25.8567	21.58	0.260841	0.0618672	0.0618672
mix_10892_1	17.855	13.1706	0.165	0.267067	K14403		K10689	47.455	44.6467	0.0880076	0.0405282	0.0405282
mix_10914_1	7.58167	9.83689	41.1783	72.1257	K03234		K17887	49.005	15.395	1.67047	0.53789	0.53789
mix_10916_1	5.61667	2.75343	4.22333	4.38976	K02830		K12859	24.2017	17.4633	0.470777	0.0980747	0.0980747
mix_10918_2	64.615	83.2383	21.6567	32.5794	K07975		K03027	170.413	99.8467	0.771252	1.04219	1.04219
mix_1091_1	4.12833	9.23123	0.273333	0.485924	K00008		K15267	20.35	7.13167	1.51272	0.20786	0.20786
mix_10926_1	4.46833	7.15025	19.7133	30.0598	K02937		K01940	543.212	338.463	0.682515	3.00878	3.00878
mix_10927_1	0.0933333	0.2087	10.4583	15.4418	K02937		K10524	39.0617	16.885	1.21001	0.338481	0.338481
mix_10928_1	2.25333	2.4826	0	0	K02937		K09648	9.95	14.2533	-0.518531	0.0627509	0.0627509
mix_10929_1	0.311667	0.481332	0	0	K02937		K08963	45.2617	17.225	1.39379	0.435465	0.435465
mix_1092_1	7.35667	6.54637	0.39	0.43673	K10742		K08681	122.483	59.2417	1.0479	0.952149	0.952149
mix_10930_1	10.76	6.30865	6.29667	5.76792	K11672		K11576	23.4233	13.485	0.796591	0.147004	0.147004
mix_10945_1	71.3683	56.6157	2.85667	3.01776	K07889		K15303	18.6833	65.8783	-1.81805	0.768688	0.768688
mix_10946_1	4.34167	3.51661	0.0583333	0.130437	K07889		K17668	22.3533	27.145	-0.280197	0.0693463	0.0693463
mix_1094_2	4.02667	3.35554	0.363333	0.529297	K03860		K11568	5.73	7.94833	-0.472117	0.0322889	0.0322889
mix_10950_1	0.36	0.804984	0.22	0.33828	K01602		K05757	159.982	93.5367	0.774303	0.9815	0.9815
mix_10951_1	43.345	24.7685	25.2283	23.5056	K15177		K05756	125.295	94.515	0.406714	0.446999	0.446999
mix_10953_1	5.68333	2.55091	7.25167	7.86913	K01426		K05287	41.88	29.9933	0.48162	0.173078	0.173078
mix_10957_1	0.563333	1.19813	4.67833	8.42774	K06174		K07441	23.035	19.9867	0.20479	0.044052	0.044052
mix_10958_1	7.73833	4.94289	6.05333	4.64717	K06877		K01803	1225.99	772.575	0.6662	6.65722	6.65722
mix_10959_1	4.84333	3.71481	3.50667	2.98913	K06877		K00029	8.01	0.983333	3.02605	0.136071	0.136071
mix_1095_1	46.6117	37.6257	0.581667	0.824832	K10971		K12845	902.94	575.05	0.650943	4.81043	4.81043
mix_10960_2	0	0	0	0	K14998		K01465	83.095	44.1383	0.91273	0.580648	0.580648
mix_10962_1	17.8433	12.4398	13.1933	11.3385	K07513		K02961	60.3583	44.635	0.435378	0.228559	0.228559
mix_10964_2	12.015	7.35918	7.6	8.56135	K07513		K10704	72.82	30.4933	1.25584	0.648726	0.648726
mix_1096_3	3.18667	3.51974	0	0	K15278		K06679	13.7933	8.40333	0.714938	0.0793461	0.0793461
mix_10975_1	14.7433	6.26561	10.3217	9.62558	K11677		K13237	9.98667	8.77667	0.18633	0.0174809	0.0174809
mix_10977_1	7.12833	5.0417	2.67667	2.60377	K11677		K17491	65.595	32.8733	0.996668	0.490701	0.490701
mix_10980_1	20.2533	12.1833	23.265	32.2893	K08505		K00002	186.458	130.645	0.513201	0.813689	0.813689
mix_10981_1	15.2167	15.6322	1.65333	2.42748	K08505		K02304	28.0833	15.7667	0.832837	0.182599	0.182599
mix_10986_1	98.0783	59.7467	56.3967	47.3447	K14857		K03099	99.9333	63.1717	0.661688	0.539623	0.539623
mix_10987_1	74.0067	45.8738	45.7783	40.4218	K14857		K17757	35.0267	30.6867	0.190842	0.0627042	0.0627042
mix_10989_2	4.12167	5.25199	3.35167	4.8622	K14526		K00326	420.473	392.363	0.0998241	0.405703	0.405703
mix_1098_2	0.611667	1.36773	0.0466667	0.10435	K01230		K00999	88.3283	36.32	1.28211	0.799066	0.799066
mix_10991_1	9.70333	4.75919	11.955	10.4279	K12199		K02902	26.8717	14.9967	0.841444	0.176149	0.176149
mix_10993_1	7.695	3.03422	4.58833	3.9467	K12199		K10842	15.705	9.60167	0.709867	0.0898219	0.0898219
mix_10995_1	4.37833	3.54699	0.316667	0.434537	K01187		K15901	24.1517	16.9367	0.511973	0.105181	0.105181
mix_10996_1	10.36	6.83222	0.236667	0.341012	K01187		K18423	78.0283	46.85	0.735949	0.45952	0.45952
mix_10998_1	18.375	8.73052	20.0567	19.4763	K00295		K03177	38.1583	26.1183	0.546935	0.175776	0.175776
mix_10999_1	29.19	20.8049	31.635	33.9882	K00295		K02932	1436.56	739.66	0.957689	10.4207	10.4207
mix_1100_2	23.535	15.1696	0.486667	0.675146	K01895		K11359	57.7183	19.1083	1.59483	0.612626	0.612626
mix_11015_1	42.1933	32.188	47.265	47.1605	K00550		K03136	25.5283	9.73167	1.39134	0.245293	0.245293
mix_11016_1	67.285	45.0757	46.6583	44.999	K00550		K01702	192.168	98.315	0.966887	1.40432	1.40432
mix_1101_1	4.535	7.62246	1.82	2.98253	K00948		K10364	53.7467	24.3083	1.14472	0.446757	0.446757
mix_11023_1	0	0	0	0	K11254		K01758	544.345	516.837	0.0748129	0.39695	0.39695
mix_11025_1	451.543	281.398	280.24	312.427	K11254		K02151	29.0083	15.3183	0.921208	0.20417	0.20417
mix_11026_1	0	0	5.19167	11.6089	K11254		K06943	287.208	127.417	1.17254	2.43083	2.43083
mix_1103_1	12.0833	12.8598	0	0	K17428		K15340	36.9367	29.7217	0.313539	0.1045	0.1045
mix_1103_2	13.2817	10.0107	0.151667	0.230247	K08991		K07943	6.69	3.95333	0.758937	0.0403881	0.0403881
mix_11041_1	35.2033	27.571	0.745	0.767697	K20047		K09313	17.13	10.6883	0.680488	0.0946502	0.0946502
mix_11042_1	34.405	27.9249	1.135	1.67268	K20047		K01079	46.6283	29.33	0.66883	0.254016	0.254016
mix_11046_1	6.10167	4.98388	0	0	K20047		K03671	1451.86	1157.27	0.327173	4.26819	4.26819
mix_11057_1	8.67833	7.42045	12.67	10.7298	K17278		K17976	23.575	13.12	0.84549	0.155126	0.155126
mix_11059_1	6.255	7.65543	5.475	5.89315	K17278		K17795	18.5683	0.163333	6.82888	0.639582	0.639582
mix_11061_1	4.74833	2.25858	4.18	3.9509	K01127		K11092	16.7783	13.6867	0.293828	0.0447574	0.0447574
mix_11062_1	9.28167	6.54854	7.87333	7.53025	K01127		K02737	155.682	85.2517	0.868799	1.04661	1.04661
mix_11064_1	2.53	2.74101	3.06167	3.62578	K01127		K19860	9.15	6.51833	0.489269	0.0383301	0.0383301
mix_11067_1	8.50333	7.98101	5.645	4.38046	K09228		K12260	28.2967	22.7833	0.312653	0.0798516	0.0798516
mix_11068_1	41.2583	22.4158	31.7317	26.7502	K05543		K00412	4499.8	2707.62	0.732838	26.4093	26.4093
mix_11069_1	30.4183	16.2533	24.82	21.7437	K05543		K00856	236.25	138.255	0.772983	1.44743	1.44743
mix_11080_1	75.505	54.0532	61.5483	60.181	K02146		K16794	65.4867	40.6817	0.686822	0.364594	0.364594
mix_11081_1	76.1517	55.3493	56.535	55.2838	K02146		K17977	8.97	7.30167	0.296882	0.0241538	0.0241538
mix_11090_1	7.615	4.83347	9.20333	10.2548	K13205		K17674	44.175	29.325	0.591099	0.217229	0.217229
mix_11092_1	24.9583	18.2367	23.1867	23.3305	K13205		K09249	17.2133	18.0483	-0.0683391	0.0120488	0.0120488
mix_11098_1	33.2633	16.6179	18.625	14.8817	K15262		K01649	754.588	432.958	0.801462	4.75887	4.75887
mix_110_1	141.132	125.441	5.18833	6.0418	K01336		K18550	24.1883	15.2083	0.669449	0.13187	0.13187
mix_11100_2	31.2383	69.851	43.4833	97.2317	K02914		K11131	241.038	104.483	1.20599	2.08348	2.08348
mix_11101_3	9.845	13.1017	1.23667	1.81961	K02627		K03231	13870	6549.48	1.08251	110.521	30
mix_11103_1	60.27	33.708	45.31	47.5772	K12275		K00995	23.8933	17.4333	0.45476	0.0939685	0.0939685
mix_11104_1	29.8217	18.408	18.2783	16.8191	K12275		K10753	102.225	66.1267	0.628444	0.528998	0.528998
mix_11105_1	0.728333	1.50265	5.155	8.87778	K03254		K18065	69.94	78.0867	-0.158958	0.11765	0.11765
mix_11106_1	4.16833	8.64182	0.661667	1.11968	K19861		K06689	1053.86	474.493	1.15122	8.79735	8.79735
mix_11108_1	4.45	6.81952	0.978333	2.18762	K15902		K11882	33.52	17.99	0.897827	0.231235	0.231235
mix_11110_1	15.05	11.2093	10.9517	13.3372	K15902		K01802	3242.77	2204.86	0.556538	15.1591	15.1591
mix_11112_1	3.63667	8.13183	13.745	18.462	K15902		K14572	302.087	184.657	0.710117	1.72822	1.72822
mix_11115_1	49.9217	26.9685	42.515	45.966	K02946		K08493	154.313	32.9883	2.22583	2.08451	2.08451
mix_11116_1	41.5483	21.5893	40.7433	39.7781	K02946		K07874	267.105	162.872	0.713671	1.53431	1.53431
mix_11120_1	125.97	57.4657	148.633	137.2	K17968		K12614	188.283	87.225	1.11009	1.5292	1.5292
mix_11123_1	0.273333	0.4168	4.09667	5.62739	K00948		K17666	26.6567	28.5817	-0.100594	0.0277831	0.0277831
mix_1112_1	1.4	2.2579	0.105	0.234787	K03949		K17764	22.4117	16.065	0.480329	0.0924073	0.0924073
mix_11130_1	9.45	5.82896	7.665	7.53879	K14407		K18416	16.6433	1e-08	30.6323	2.54912	2.54912
mix_11132_2	15.9167	8.58586	12.3817	9.93237	K14407		K02948	69.6933	47.65	0.548544	0.32184	0.32184
mix_11134_1	6.40167	7.25664	1.23667	1.9182	K05916		K06890	128.922	119.367	0.111095	0.137918	0.137918
mix_11135_1	2.41	4.84732	0	0	K05916		K02893	2184.75	801.602	1.44651	21.5989	21.5989
mix_11151_1	9.28333	6.51627	4.705	4.45676	K14766		K17778	431.997	344.857	0.325023	1.26248	1.26248
mix_11152_1	4.86333	10.0196	0	0	K14766		K01764	209.458	107.657	0.960226	1.52251	1.52251
mix_11154_1	3.83	8.26377	0.158333	0.354044	K09503		K20304	36.825	19.8783	0.889489	0.252185	0.252185
mix_11156_1	122.242	70.8387	79.42	70.2644	K10949		K00422	9.14	1.72167	2.40839	0.130796	0.130796
mix_11156_2	16.6267	16.4153	16.4517	24.5973	K10949		K11553	52.1467	30.535	0.772111	0.319197	0.319197
mix_1115_1	10.4817	8.20793	0.44	0.529748	K10746		K12765	15.73	4.27833	1.8784	0.187918	0.187918
mix_11161_1	0	0	0	0	K17773		K10627	26.415	18.1217	0.543642	0.12106	0.12106
mix_11162_1	3.03667	2.58141	1.585	1.5698	K17868		K02973	928.185	301.9	1.62034	9.96579	9.96579
mix_11163_1	7.065	5.04498	5.61333	6.49655	K17868		K03457	313.238	236.145	0.407588	1.11961	1.11961
mix_11170_1	7.22333	2.88068	6.51	7.43089	K11314		K01875	170.687	92.645	0.881565	1.16072	1.16072
mix_11171_1	3.00833	1.30804	2.94	2.71435	K11314		K17498	74.1067	54.2483	0.450025	0.288814	0.288814
mix_11172_1	9.87333	8.0063	5.55167	4.85582	K18713		K02202	244.423	33.13	2.88317	4.00117	4.00117
mix_11174_1	0	0	0	0	K03355		K16194	42.1883	1.47	4.84296	1.05718	1.05718
mix_11174_2	17.1467	12.3965	13.145	14.3495	K18713		K05863	3110.95	1804.82	0.785497	19.3066	19.3066
mix_11175_1	193.87	126.337	185.32	208.705	K04564		K10686	27.0317	16.9367	0.674501	0.148283	0.148283
mix_1117_1	0	0	4.085	6.6558	K14780		K15331	54.595	37.3833	0.546374	0.251273	0.251273
mix_11181_1	21.3217	17.3053	13.245	12.9695	K08517		K01693	104.668	67.9533	0.623209	0.537897	0.537897
mix_11182_1	10.0867	7.09115	9.46167	9.4168	K08517		K01915	687.533	482.678	0.510368	2.98619	2.98619
mix_11189_2	0	0	0	0	K02917		K19932	81.0333	18.3267	2.14457	1.06542	1.06542
mix_1118_1	0	0	2.76667	6.18645	K01535		K06134	27.0633	21.9283	0.303543	0.0743555	0.0743555
mix_11192_1	35.9083	14.8509	28.8583	22.9789	K03140		K20102	1e-08	0.785	-26.2262	0.102938	0.102938
mix_11195_1	5.425	6.55303	5.86167	7.2066	K13954		K12603	122.843	70.7333	0.796357	0.770781	0.770781
mix_11196_1	2.73	4.41238	6.64333	7.89421	K13954		K00818	157.352	73.8867	1.09061	1.26095	1.26095
mix_11197_2	0	0	0	0	K13954		K17797	21.845	16.2767	0.424498	0.0809128	0.0809128
mix_11198_1	3.84	4.44621	5.76167	7.18404	K13954		K15442	22.02	25.675	-0.22155	0.0528341	0.0528341
mix_111_1	0	0	9.46	11.1572	K17871		K00761	95.855	20.265	2.24186	1.30163	1.30163
mix_11200_1	0	0	14.8917	21.1696	K02989		K03325	59.745	68.1667	-0.190248	0.121675	0.121675
mix_11201_1	4.305	5.65921	31.1017	51.0273	K02989		K16575	21.215	11.1717	0.92524	0.149827	0.149827
mix_11202_1	1472.78	842.844	699.807	633.639	K02989		K09274	83.915	81.9183	0.0347424	0.0288072	0.0288072
mix_11203_1	0	0	0	0	K02989		K17422	113.85	88.8017	0.358476	0.363228	0.363228
mix_11205_1	10.9617	12.8821	0.611667	0.907458	K02989		K13754	31.1233	26.4567	0.234365	0.0674738	0.0674738
mix_11210_3	3.36	3.27804	0.998333	1.72115	K16912		K17661	21.75	23.3533	-0.102613	0.023141	0.023141
mix_11211_1	0	0	0.89	1.9901	K16912		K18600	12.48	16.0967	-0.367144	0.0524588	0.0524588
mix_11212_1	17.2183	14.3716	14.0167	14.9799	K16912		K14781	38.5617	14.7317	1.38825	0.369921	0.369921
mix_11214_1	4.42167	2.42201	4.76	4.64714	K16912		K02723	2.16667	1e-08	27.6909	0.299985	0.299985
mix_11217_1	9.55167	4.42503	6.87167	5.0915	K13288		K06669	77.7217	30.3583	1.35622	0.732904	0.732904
mix_11218_1	10.3033	9.63003	10.94	11.1801	K13288		K06687	65.815	39.5667	0.734131	0.38682	0.38682
mix_1121_1	5.73	3.97862	0.241667	0.540383	K16570		K02926	128.322	68.44	0.906853	0.89217	0.89217
mix_11222_1	4.615	4.50718	2.92333	2.30124	K11293		K20295	47.9033	24.1183	0.989996	0.356506	0.356506
mix_11223_1	7.44	6.54888	6.77333	6.1286	K11293		K17800	339.928	209.182	0.700474	1.92319	1.92319
mix_11224_1	7.73333	7.61151	1.87333	3.46942	K09104		K01130	21.9317	11.5017	0.931173	0.155661	0.155661
mix_11225_1	59.7767	17.1816	41.33	33.9561	K09104		K14851	16.8567	16.6817	0.0150558	0.00252474	0.00252474
mix_11226_1	24.3917	24.704	11.8	18.1328	K09104		K13989	120.925	88.9117	0.443668	0.465489	0.465489
mix_11227_2	10.5183	14.3682	8.00167	14.6572	K09104		K11367	103.568	25.4967	2.0222	1.30498	1.30498
mix_11232_1	3.145	3.03131	3.36667	3.10777	K04648		K01599	85.3833	45.205	0.917472	0.599056	0.599056
mix_11233_1	1.495	3.34292	0.0383333	0.0857159	K04648		K14556	91.6283	57.1283	0.681587	0.506953	0.506953
mix_11234_1	1.59833	1.52517	0.933333	1.06015	K04648		K00670	156.432	78.7883	0.989479	1.16373	1.16373
mix_11236_1	6.01167	3.53585	3.24167	2.33032	K10743		K04802	205.423	113.12	0.860746	1.37092	1.37092
mix_11238_1	6.21	5.28287	4.08667	4.87569	K10743		K02895	69.2217	36.9967	0.903828	0.480016	0.480016
mix_11239_1	1.79	4.00256	0	0	K09705		K12194	55.645	18.3233	1.60257	0.592697	0.592697
mix_1123_1	6.05833	3.65898	0.0583333	0.130437	K09613		K02181	13.2633	13.7583	-0.0528623	0.00714214	0.00714214
mix_11240_1	5.65167	5.28005	7.415	7.04273	K09705		K00227	323.648	245.953	0.396042	1.12793	1.12793
mix_11242_1	10.1667	6.37847	7.25333	7.91093	K07025		K12855	41.85	12.8183	1.70702	0.466599	0.466599
mix_11243_2	7.95167	5.03832	3.93	3.51186	K07025		K01568	8743.56	7594.51	0.203262	16.6046	16.6046
mix_11244_1	1.88333	2.19549	2.34333	2.47248	K07025		K14835	153.227	73.5983	1.05792	1.19982	1.19982
mix_11246_1	0	0	23.015	31.9857	K02964		K08150	267.392	207.987	0.362463	0.861536	0.861536
mix_11247_1	3.22167	4.55679	23.3083	35.0952	K02964		K06636	71.7583	32.6183	1.13746	0.593623	0.593623
mix_1124_1	23.915	37.8195	3.21167	4.27032	K02912		K12867	64.8417	43.8717	0.563632	0.306371	0.306371
mix_11252_1	4.88	10.912	0.578333	0.824104	K00134		K02882	2388.11	1082.94	1.14091	19.8008	19.8008
mix_11256_1	1	2.23607	0	0	K02040		K11434	179.787	93.8883	0.937268	1.28253	1.28253
mix_11258_1	0.316667	0.45408	0.193333	0.432306	K02040		K10365	77.9967	32.4167	1.26668	0.69929	0.69929
mix_11259_1	30.4067	16.4499	19.315	19.4438	K15435		K17908	60.0967	48.345	0.313918	0.170209	0.170209
mix_11260_1	12.65	9.49438	9.43	9.60594	K14213		K02731	82.3567	47.0933	0.806363	0.521918	0.521918
mix_11264_1	19.4617	13.1499	19.1583	16.0586	K02992		K02127	640.2	423.67	0.595582	3.16811	3.16811
mix_11266_1	27.4867	17.0108	30.6333	29.4769	K02992		K10752	71.2433	36.7267	0.955927	0.516057	0.516057
mix_11268_1	0.163333	0.306902	3.21833	5.09728	K20222		K06640	16.8067	0.321667	5.70732	0.488785	0.488785
mix_1126_1	3.73333	3.77112	0	0	K01874		K10997	42.3317	19.0217	1.15409	0.354037	0.354037
mix_11274_1	33.9933	17.3905	26.6067	23.7877	K11770		K15507	46.925	34.6517	0.437432	0.178421	0.178421
mix_11275_1	11.3917	8.22685	13.4433	13.1621	K11770		K11541	521.113	240.797	1.11378	4.24301	4.24301
mix_1127_1	1.93333	1.70036	0.106667	0.238514	K01874		K10579	36.855	11.3317	1.7015	0.409948	0.409948
mix_1128_1	0.148333	0.331683	4.815	8.78547	K17086		K01267	40.2767	21.5083	0.905049	0.279592	0.279592
mix_11291_1	18.63	8.69738	10.695	8.91196	K14765		K11262	685.002	266.975	1.3594	6.4706	6.4706
mix_11292_2	0	0	0	0	K19998		K03132	19.9217	8.62667	1.20746	0.172355	0.172355
mix_11293_1	42.1733	25.1078	29.255	23.3693	K04499		K14007	323.565	156.138	1.05123	2.52139	2.52139
mix_11300_1	0.321667	0.599011	4.38833	7.03408	K14558		K19717	692.818	650.395	0.0911609	0.612243	0.612243
mix_11301_1	0.803333	1.17078	5.5	8.01643	K14558		K17791	61.1533	54.9167	0.155187	0.0900628	0.0900628
mix_11309_1	8.86	6.29543	4.965	5.08683	K10866		K03469	21.4117	7.43333	1.52632	0.220133	0.220133
mix_11310_1	6.305	5.60017	4.67333	4.13464	K10866		K01883	50.9183	22.2833	1.19222	0.436363	0.436363
mix_11314_2	11.8267	7.82946	7.61	6.08595	K01426		K12768	8.825	7.07667	0.318526	0.0253255	0.0253255
mix_11315_1	10.9533	8.88665	6.07667	6.20346	K12669		K18693	120.255	73.2417	0.71536	0.692099	0.692099
mix_11317_1	8.14	5.87986	3.04167	3.90921	K12669		K01440	68.8817	98.795	-0.520318	0.436226	0.436226
mix_11318_1	0.725	1.62115	0.77	1.72177	K04705		K18731	5.41167	9.745	-0.848589	0.0643089	0.0643089
mix_11319_1	20.6	10.5118	15.1367	13.2316	K04705		K02873	2425.51	1050.38	1.20738	20.9835	20.9835
mix_1131_1	1.84	2.60218	0	0	K10858		K03260	322.222	106.605	1.59578	3.42156	3.42156
mix_11320_1	18.0433	15.4338	20.5083	20.7998	K04705		K04708	35.3917	22.8783	0.629428	0.183384	0.183384
mix_1132_1	198.585	144.662	5.25	5.92565	K02991		K11552	13.9133	9.93167	0.48636	0.0579863	0.0579863
mix_1133_1	2.04333	2.52534	0	0	K14815		K08497	31.6433	14.275	1.14841	0.263666	0.263666
mix_1135_1	31.31	22.9575	0.893333	1.20722	K01889		K03115	210.725	144.532	0.543976	0.966255	0.966255
mix_11362_1	0	0	1.41167	3.15658	K11594		K00286	52.4367	25.14	1.06059	0.411386	0.411386
mix_11363_1	2.85	5.22167	2.85167	4.51469	K08288		K20247	69.6417	47.28	0.558721	0.326633	0.326633
mix_11365_1	6.545	9.44718	32.71	47.0425	K02920		K00088	684.448	417.57	0.712924	3.92827	3.92827
mix_11367_1	0	0	12.1567	17.3696	K02920		K00762	280.818	188.317	0.576476	1.35223	1.35223
mix_11368_1	0.346667	0.245538	3.78333	5.99921	K08712		K03105	82.2667	38.465	1.09676	0.662069	0.662069
mix_11371_1	4.31167	2.49407	3.72167	3.76563	K08592		K15220	14.21	11.0833	0.358515	0.0453402	0.0453402
mix_11372_1	12.0783	7.85886	11.9017	10.0811	K08592		K12827	29.1767	28.735	0.022006	0.00637203	0.00637203
mix_11373_1	3.19333	2.08507	2.02833	2.14572	K03351		K15446	30.4317	13.4517	1.17779	0.258426	0.258426
mix_11374_1	1.93333	1.63243	1.79833	2.25105	K03351		K11294	463.072	287.433	0.688008	2.58177	2.58177
mix_11377_2	0	0	0	0	K14856		K07748	97.0233	69.1067	0.489507	0.406609	0.406609
mix_1137_1	5.815	4.41793	0.305	0.581313	K10747		K03626	440.283	246.817	0.834992	2.86862	2.86862
mix_11386_1	157.59	83.1367	89.2783	78.9528	K14820		K11126	31.8683	15.56	1.03428	0.245271	0.245271
mix_11387_1	267.407	225.209	193.535	222.553	K17279		K06684	84.5383	54.7083	0.627845	0.437127	0.437127
mix_11392_1	28.435	16.6239	22.1	18.9842	K11095		K02883	2205.82	953.932	1.20936	19.1064	19.1064
mix_11393_1	25.0467	17.5473	25.1883	21.5261	K11095		K12608	41.4567	18.3317	1.17727	0.351934	0.351934
mix_11396_1	7.70667	5.19977	4.67	3.84232	K14784		K07374	211.87	64.4233	1.71752	2.3727	2.3727
mix_11397_1	11.62	10.7495	9.41667	8.40062	K14784		K03327	132.158	68.5717	0.946583	0.950038	0.950038
mix_11407_1	43.7717	26.9437	32.9783	31.1216	K20048		K13099	6.40167	6.095	0.0708213	0.00442515	0.00442515
mix_11408_1	19.1117	18.2909	16.25	18.1425	K20048		K00915	45.615	20.3283	1.16602	0.384455	0.384455
mix_11411_1	6.19	9.50412	41.6717	60.3642	K02966		K03120	175.103	56.3783	1.63499	1.89236	1.89236
mix_11413_1	190.728	128.888	4.66	5.51955	K02930		K09522	244.457	89.5567	1.44871	2.41944	2.41944
mix_11414_1	138.597	97.9924	4.015	5.57156	K02930		K07117	73.6833	56.3433	0.387093	0.251662	0.251662
mix_11418_1	25.3067	13.3568	28.4117	25.1637	K01598		K02725	186.05	21.535	3.11094	3.22892	3.22892
mix_11419_1	24.635	13.1389	27.0267	26.1899	K01598		K00706	1239.86	535.66	1.21079	10.7489	10.7489
mix_11422_1	9.02667	6.21794	4.77333	4.29699	K07573		K00111	1036.7	706.39	0.553459	4.82364	4.82364
mix_11423_1	5.52833	4.84729	2.98167	2.69249	K07573		K17508	46.8683	27.3267	0.778304	0.288731	0.288731
mix_11425_1	14.1867	9.34347	13.2833	15.1517	K17550		K14327	48.935	40.265	0.28134	0.125478	0.125478
mix_11426_1	4.23	3.9921	4.435	5.11998	K17550		K14564	398.635	177.315	1.16875	3.36572	3.36572
mix_11427_1	535.975	316.018	389.11	373.411	K07936		K15151	18.075	5.8	1.63987	0.19576	0.19576
mix_11428_1	0.0883333	0.197519	8.84	9.26994	K07936		K14290	133.113	91.7233	0.537294	0.604017	0.604017
mix_11429_1	11.1083	9.02336	8.96167	6.64163	K07936		K09539	30.85	14.6817	1.07125	0.24388	0.24388
mix_1142_1	3.01333	3.94493	3.54167	4.48259	K19323		K01669	11.5033	11.9083	-0.0499195	0.0058435	0.0058435
mix_11430_1	3.63	7.15794	12.0167	18.4902	K07936		K03660	63.0317	89.1767	-0.500589	0.380969	0.380969
mix_11431_1	4.835	5.86223	1.01	1.43098	K07936		K16945	52.5933	20.9683	1.32667	0.487959	0.487959
mix_11432_1	6.88	4.78284	7.52	6.37879	K15275		K12592	60.4383	19.2517	1.65048	0.657634	0.657634
mix_11433_1	3.89333	2.83448	2.96	2.55176	K15275		K15322	24.9367	10.7967	1.20768	0.215773	0.215773
mix_11434_1	26.3667	18.6775	20.8033	19.5727	K17103		K11680	29.3467	18.3767	0.675322	0.161143	0.161143
mix_11435_1	38.125	29.6385	36.1333	38.5425	K17103		K11251	1202.96	927.803	0.374698	3.99196	3.99196
mix_11436_1	119.732	84.2768	61.39	57.6385	K02957		K02870	1739.3	713.687	1.28514	15.7622	15.7622
mix_11441_1	62.225	43.857	28.1933	30.1627	K02957		K02918	1340.86	74.39	4.17191	29.5216	29.5216
mix_11444_1	22.1783	9.91859	13.0067	9.50314	K09142		K01092	28.84	27.7417	0.0560167	0.0158476	0.0158476
mix_11447_1	11.71	9.16533	6.865	5.59184	K09142		K16732	28.6933	11.495	1.31971	0.265185	0.265185
mix_11448_1	26.2917	12.6698	15.6883	13.7823	K09142		K09568	1616.27	1322.49	0.28941	4.25253	4.25253
mix_11451_1	7.86333	5.87295	4.18333	4.43737	K11778		K11399	38.285	26.8267	0.513111	0.167048	0.167048
mix_11452_1	4.10833	3.12496	2.04	1.69419	K11778		K02905	291.187	1e-08	34.7612	50.61	30
mix_11458_1	19.6933	10.8012	6.54	5.64141	K01477		K15154	33.6133	35.485	-0.0781757	0.027009	0.027009
mix_11460_1	17.0867	10.3542	10.925	9.13795	K00921		K18342	16.6667	10.2817	0.696891	0.0939003	0.0939003
mix_11465_1	10.2717	4.9599	8.66167	6.70632	K19829		K01551	83.5067	38.0267	1.13488	0.689629	0.689629
mix_11466_1	15.585	10.1883	12.9183	10.4287	K19829		K11303	35.0617	29.7033	0.23927	0.0774815	0.0774815
mix_11469_1	35.4817	19.3197	32.7667	30.8342	K10689		K18748	172.878	106.382	0.700508	0.978119	0.978119
mix_1146_1	6.33333	5.83124	0.0666667	0.149071	K17887		K12188	25.2133	10.7833	1.22538	0.220549	0.220549
mix_1146_2	4.57833	3.1334	1.13	2.52676	K17887		K12584	38.19	36.0367	0.0837293	0.0310748	0.0310748
mix_1146_3	0	0	0	0	K12859		K07390	113.148	75.6067	0.58163	0.548928	0.548928
mix_11470_1	3.80333	3.29962	11.88	10.3933	K10689		K01922	37.0917	23.0833	0.684244	0.205872	0.205872
mix_11471_1	0.74	0.796639	7.53	10.8131	K03027		K12261	37.8717	20.1433	0.910816	0.264205	0.264205
mix_11473_1	8.48833	11.884	1.425	1.80638	K16230		K01490	106.275	66.9817	0.665964	0.576914	0.576914
mix_11478_1	8.25667	6.10597	4.41167	4.36704	K15267		K12585	131.928	98.605	0.420022	0.484145	0.484145
mix_11479_1	4.33667	2.95568	2.62667	2.76111	K15267		K15430	63.53	44.9167	0.500187	0.271218	0.271218
mix_1147_1	4.69833	7.26414	0	0	K01940		K15204	70.945	37.6017	0.915904	0.497092	0.497092
mix_11481_1	0.966667	1.47516	63.2967	55.2477	K00134		K20522	388.953	273.243	0.509411	1.68665	1.68665
mix_11482_1	0	0	16.4033	22.4568	K00134		K18158	78.3083	71.26	0.136073	0.101761	0.101761
mix_11484_1	283.793	152.72	3.60167	2.59511	K00134		K14864	118.785	74.2317	0.678246	0.654564	0.654564
mix_11487_1	4985.27	3021.23	100.647	73.8402	K00134		K04799	27.9033	21.5217	0.374648	0.0925848	0.0925848
mix_11494_1	8.065	4.80987	7.09667	6.65829	K10524		K14310	58.6533	27.1267	1.1125	0.477152	0.477152
mix_11496_1	12.2267	8.83093	9.18333	6.76557	K10524		K14554	85.9833	43.0383	0.998435	0.644099	0.644099
mix_1149_1	1.81167	1.86213	0	0	K09648		K11599	117.528	63.8683	0.879836	0.797996	0.797996
mix_11502_1	11.13	8.03325	7.20167	6.44816	K08963		K14963	42.945	33.1367	0.374062	0.142296	0.142296
mix_11503_1	16.845	8.94286	9.77667	8.34148	K08963		K00749	130.007	3.42167	5.24774	3.50099	3.50099
mix_11504_1	57.0033	18.7359	29.3633	24.8539	K08681		K03259	332.668	198.518	0.744812	1.97817	1.97817
mix_11506_2	45.58	15.4823	29.8783	26.6953	K08681		K11236	56.3717	25.7	1.1332	0.465019	0.465019
mix_11507_2	1.29	1.82466	1.69667	3.79386	K11576		K17804	119.252	69.195	0.78527	0.739907	0.739907
mix_11509_1	0	0	0	0	K10729		K12844	33.6617	18.715	0.846912	0.221792	0.221792
mix_11509_2	11.9167	7.69624	4.88	5.28352	K11576		K03004	101.19	39.3883	1.36123	0.956795	0.956795
mix_11509_3	7.5	3.41869	4.565	5.14574	K11576		K06685	22.78	7.005	1.70131	0.253368	0.253368
mix_11510_1	2.71667	2.1907	2.34333	2.92582	K11576		K11243	4.85333	2.22167	1.12733	0.0398794	0.0398794
mix_11511_1	18.6833	18.3509	65.8783	79.8083	K15303		K02265	993.678	626.432	0.665622	5.3919	5.3919
mix_11518_1	8.015	6.58889	7.88667	6.74949	K17668		K06675	63.75	23.7817	1.42258	0.622602	0.622602
mix_11519_1	4.24667	3.14419	5.44	4.20018	K17668		K00750	21.0917	11.4817	0.877341	0.14289	0.14289
mix_11524_1	5.73	6.60516	7.94833	13.2392	K11568		K02971	3383.73	1203.63	1.49123	34.2039	30
mix_11525_1	54.1117	39.6173	48.045	47.4348	K05757		K20476	45.39	13.1583	1.7864	0.522953	0.522953
mix_11526_1	55.1767	33.1919	44.7317	46.2309	K05757		K18802	34.62	32.8067	0.0776167	0.0261672	0.0261672
mix_11527_1	79.2267	47.213	78.725	79.7554	K05756		K04371	84.7333	65.8717	0.363272	0.273553	0.273553
mix_11529_1	13.2517	11.3575	15.1617	17.8462	K05756		K02976	2516.46	1405.09	0.840738	16.485	16.485
mix_11534_1	24.7567	20.5735	17.9783	18.354	K05287		K08257	120.722	57.28	1.07558	0.957276	0.957276
mix_11535_1	17.1233	15.2423	12.015	12.622	K05287		K12619	94.8083	38.3517	1.30572	0.869351	0.869351
mix_11538_2	21.4067	14.8151	19.9867	20.6073	K07441		K10901	48.0417	25.2967	0.925339	0.339314	0.339314
mix_11540_1	428.933	325.406	741.603	853.703	K01803		K14831	28.5483	10.85	1.39571	0.274944	0.274944
mix_11544_1	8.01	17.1879	0.983333	1.61432	K00029		K02220	185.567	22.57	3.03946	3.16311	3.16311
mix_11548_2	782.233	482.37	521.79	495.362	K12845		K19718	124.922	84.8167	0.558604	0.585803	0.585803
mix_1154_1	12.6533	8.51062	0.12	0.172143	K01465		K17665	28.86	24.1733	0.255655	0.0677912	0.0677912
mix_11550_1	14.175	15.0513	5.08667	7.46123	K02961		K11429	9.525	0.158333	5.91068	0.286176	0.286176
mix_11551_1	46.1833	23.7501	39.5483	34.8441	K02961		K14557	51.2683	28.47	0.848626	0.33834	0.33834
mix_1155_1	0	0	0	0	K01465		K07342	101.31	81.19	0.319403	0.291455	0.291455
mix_11562_1	26.9383	17.2105	30.1667	30.5338	K10704		K02134	344.883	184.355	0.903622	2.39116	2.39116
mix_11565_1	5.10333	5.62255	0	0	K06679		K06670	73.7883	41.7283	0.822365	0.474985	0.474985
mix_11566_1	6.49333	2.49698	5.71333	4.70225	K13237		K00411	544.155	345.838	0.65392	2.90992	2.90992
mix_11566_2	0	0	0	0	K17491		K12492	91.395	51.7167	0.821486	0.587821	0.587821
mix_11568_1	3.49333	2.69179	3.06333	3.27886	K13237		K13886	121.278	64.3517	0.914272	0.848582	0.848582
mix_11570_1	9.48	7.89921	15.6583	20.9838	K00002		K16066	183.395	154.443	0.247877	0.418711	0.418711
mix_11572_1	36.545	26.2469	36.8183	40.9182	K00002		K03800	69.655	58.1317	0.260903	0.166699	0.166699
mix_11573_2	3.81167	2.24376	4.98	4.7748	K02304		K06671	20.39	9.13	1.15918	0.171094	0.171094
mix_11574_2	11.19	5.70339	9.76667	7.86487	K02304		K12776	0.278333	0.405	-0.541108	0.00184879	0.00184879
mix_11581_1	15.36	10.6631	15.2417	14.0089	K03099		K12872	39.3	17.8367	1.13968	0.325589	0.325589
mix_11582_1	13.25	9.94058	8.53833	8.32192	K03099		K05528	109.878	62.82	0.806611	0.696502	0.696502
mix_11583_1	11.0467	7.88387	16.3583	17.887	K17757		K13289	917.652	237.117	1.95235	11.2726	11.2726
mix_11584_2	170.005	114.69	234.208	273.893	K00326		K20498	67.6283	57.2167	0.241192	0.150558	0.150558
mix_11586_1	0	0	0	0	K17757		K15172	102.925	46.6667	1.14113	0.853517	0.853517
mix_11588_1	6.09833	1.86041	11.7183	12.6877	K17757		K07119	291.128	216.592	0.426678	1.08316	1.08316
mix_11589_1	50.855	26.8042	34.2283	36.4184	K00999		K11776	32.8017	27.885	0.23428	0.0710883	0.0710883
mix_11592_1	15.2867	6.9701	7.98833	6.46148	K02902		K14297	92.6367	54.0767	0.776577	0.569671	0.569671
mix_11593_1	7.64167	5.80604	6.27833	5.91648	K02902		K17439	141.452	96.98	0.54455	0.64919	0.64919
mix_11595_1	3.15	3.75145	2.02333	3.36288	K10842		K03882	4.79167	0.926667	2.37041	0.0677738	0.0677738
mix_11597_1	8.52333	8.05131	7.99167	6.01359	K15901		K03883	67.3	21.3917	1.65356	0.733284	0.733284
mix_11598_1	11.3567	10.9572	8.945	9.47532	K15901		K17775	79.095	46.2817	0.773146	0.484672	0.484672
mix_1159_1	0	0	0	0	K18423		K02984	2177.91	739.123	1.55906	22.7391	22.7391
mix_11601_1	1.50833	2.24462	0	0	K03177		K11761	63.5167	21.02	1.59537	0.674337	0.674337
mix_11601_2	0	0	0	0	K03177		K16368	190.76	134.885	0.500029	0.814159	0.814159
mix_11601_3	282.31	186.163	7.36	7.39268	K02932		K05954	20.4117	6.68167	1.61111	0.218252	0.218252
mix_11612_1	6.29667	3.8474	3.3	4.00617	K11359		K14573	113.042	41.3417	1.45119	1.12019	1.12019
mix_11619_1	15.105	7.99797	9.73167	7.79196	K03136		K13721	85.0983	46.6783	0.866378	0.570842	0.570842
mix_1161_1	70.19	57.0164	2.46667	2.99892	K01702		K15109	229.342	149.207	0.620186	1.17385	1.17385
mix_11624_1	17.6283	12.6627	13.4717	16.0505	K10364		K13345	25.6267	23.7017	0.112657	0.027786	0.027786
mix_1162_1	0.0383333	0.0857159	7.65667	7.67826	K01758		K11574	11.01	14.1633	-0.363346	0.0457332	0.0457332
mix_11630_2	19.0317	12.0862	12.9283	8.93614	K02151		K01792	97.0833	100.918	-0.0558927	0.0553343	0.0553343
mix_11634_1	3.39667	2.12554	3.40167	2.87758	K11293		K00809	174.535	125.173	0.479589	0.718684	0.718684
mix_11635_1	6.26833	3.85758	7.54667	6.11406	K11293		K00765	202.895	107.687	0.913894	1.41919	1.41919
mix_11636_1	0.608333	0.904736	8.715	14.246	K06943		K08176	449.427	64.21	2.80722	7.20944	7.20944
mix_11643_1	2.68667	5.26787	2.57167	4.96527	K15340		K10736	8.89	3.63	1.29221	0.0808926	0.0808926
mix_11643_2	6.69	5.00182	3.95333	3.75539	K07943		K04630	80.48	69.9	0.203338	0.15289	0.15289
mix_11645_1	14.57	18.8067	1.84667	2.92979	K02880		K16219	32.8167	19.7567	0.732089	0.192442	0.192442
mix_11646_1	6.99833	3.73447	4.90333	3.84069	K09313		K17787	4.35	2.47333	0.814559	0.02779	0.02779
mix_11647_1	4.82667	6.15755	17.1	26.8292	K02880		K02975	1323.45	333.145	1.99008	16.4838	16.4838
mix_11648_1	556.942	298.874	281.77	234.337	K02880		K12580	128.53	75.0233	0.776694	0.790493	0.790493
mix_1165_1	18.415	11.0798	0	0	K08681		K12399	19.8317	10.4783	0.920397	0.139486	0.139486
mix_11660_1	26.4333	18.6951	16.0717	14.2993	K01079		K02137	819.743	487.853	0.748725	4.89515	4.89515
mix_11661_1	16.8933	10.4333	13.205	12.5471	K01079		K04713	848.687	410.497	1.04786	6.59725	6.59725
mix_11662_1	1050.79	567.976	1049	1086.25	K03671		K00916	70.23	40.8417	0.782046	0.434316	0.434316
mix_11665_1	0	0	0	0	K17976		K14292	29.5383	15.435	0.936383	0.210561	0.210561
mix_11667_1	0.951667	1.34883	0	0	K17795		K12837	34.22	13.39	1.35368	0.322244	0.322244
mix_11667_2	0	0	0	0	K17795		K02179	21.815	14.025	0.63732	0.114208	0.114208
mix_11669_1	5.31333	3.49539	5.37167	4.99788	K11092		K00026	822.247	665.308	0.305548	2.2726	2.2726
mix_11670_1	8.00833	5.17583	8.315	8.69395	K11092		K03881	59.5633	16.7967	1.82625	0.697262	0.697262
mix_11676_1	20.83	10.3203	13.4883	11.0893	K09503		K01939	200.697	159.848	0.328313	0.591858	0.591858
mix_11680_1	71.7167	35.2794	61.8217	54.4144	K02737		K03846	94.1883	56.545	0.736149	0.554811	0.554811
mix_11691_1	9.15	5.79502	6.51833	5.95626	K19860		K08489	23.68	11.7833	1.00692	0.178544	0.178544
mix_11692_2	23.0867	12.8873	22.7833	20.6521	K12260		K01923	80.3617	61.865	0.377384	0.26837	0.26837
mix_11701_1	0	0	0	0	K00412		K08857	41.025	4.50833	3.18584	0.725309	0.725309
mix_11704_1	11.3483	6.50992	6.17167	4.45096	K00412		K01679	332.58	224.568	0.566547	1.57825	1.57825
mix_11709_1	0.321667	0.599011	6.46667	9.64211	K00856		K14847	103.782	41.3467	1.32771	0.963441	0.963441
mix_11711_1	9.05333	5.29867	5.09	4.23881	K16794		K02835	64.2517	15.975	2.00792	0.805443	0.805443
mix_11712_1	22.195	16.8613	15.525	14.6876	K16794		K05286	22.1967	11.0633	1.00456	0.167058	0.167058
mix_11715_1	8.97	5.89768	7.30167	6.6906	K17977		K00728	616.337	302.723	1.02572	4.71349	4.71349
mix_11719_1	15.1417	9.96481	10.8417	8.92907	K17674		K17798	7.24833	5.66167	0.356422	0.0230071	0.0230071
mix_11720_1	4.675	6.79553	0.615	1.37518	K17674		K12198	24.7683	17.0417	0.53943	0.112768	0.112768
mix_11721_1	17.2133	7.42102	11.19	10.2211	K09249		K00591	11.5783	8.87167	0.384151	0.0392794	0.0392794
mix_11733_1	12.2633	4.10074	11.6817	10.5614	K01649		K12200	29.1617	12.8333	1.18418	0.248648	0.248648
mix_11735_1	10.76	4.4354	8.48833	10.4743	K01649		K03011	42.9317	23.4117	0.874815	0.290191	0.290191
mix_1173_1	0	0	0	0	K18550		K01814	30.4433	21.41	0.507842	0.131666	0.131666
mix_11747_1	66.7067	27.2872	39.09	34.1028	K03027		K09074	56.415	72.9883	-0.371587	0.240423	0.240423
mix_1174_1	11.6583	8.54608	0.123333	0.275782	K18550		K14813	211.742	118.453	0.837986	1.38349	1.38349
mix_11753_1	67.2217	35.3402	49.065	47.4707	K03027		K10246	820.312	500.723	0.712158	4.70393	4.70393
mix_11765_1	3.33833	5.0729	0.643333	1.15415	K11131		K14209	117.55	77.4733	0.601503	0.586535	0.586535
mix_11766_1	1.22833	2.43481	7.90833	13.0702	K11131		K01464	31.9367	20.9283	0.609756	0.161174	0.161174
mix_11767_1	2.67833	5.98894	0.38	0.636265	K03231		K12829	26.1983	6.93333	1.91785	0.317708	0.317708
mix_11768_1	48.9017	39.559	237.192	369.674	K03231		K10754	76.1017	37.525	1.02008	0.579539	0.579539
mix_11769_1	40.4717	52.0591	52.685	53.2954	K03231		K15145	30.965	18.99	0.705399	0.176191	0.176191
mix_1176_1	6.48	6.37989	0.273333	0.341744	K00995		K00354	900.338	852.142	0.079374	0.695506	0.695506
mix_11773_1	945.73	711.21	19.685	26.348	K03231		K19708	38.28	28.7017	0.415456	0.13914	0.13914
mix_11774_1	0.451667	0.65819	45.5583	49.0438	K03231		K02950	232.5	203.447	0.19258	0.419773	0.419773
mix_11776_1	13.28	17.8668	1.32	1.60295	K03231		K06126	51.9533	30.3683	0.774649	0.318852	0.318852
mix_11777_1	0	0	3.30167	2.93688	K03231		K09872	11.3867	1.18333	3.26642	0.205294	0.205294
mix_11778_1	96.3517	53.6859	66.1267	69.0137	K10753		K20524	22.245	5.59667	1.99084	0.277142	0.277142
mix_11784_1	0	0	0	0	K18065		K07305	84.3083	33.6283	1.326	0.781919	0.781919
mix_11786_1	1.575	2.89573	3.055	4.39806	K18065		K03145	29.6833	13.9533	1.08904	0.237611	0.237611
mix_11791_1	588.408	338.019	456.895	424.904	K06689		K11134	30.5917	31.3617	-0.0358635	0.0111093	0.0111093
mix_11801_1	18.2967	14.3639	11.5567	15.621	K11882		K04078	534.487	608.545	-0.18721	1.06993	1.06993
mix_11803_1	41.8467	20.9814	31.4733	25.9446	K01802		K12843	27.7733	3.51167	2.98347	0.46669	0.46669
mix_11804_1	15.455	12.3011	12.07	10.9342	K01802		K12346	167.262	133.807	0.321957	0.484655	0.484655
mix_1180_1	12.395	7.62859	0.283333	0.443684	K15334		K11836	55.62	32.51	0.77472	0.34138	0.34138
mix_11810_1	14.675	9.28202	8.13333	6.229	K14572		K09494	137.637	80.6883	0.770433	0.841024	0.841024
mix_11813_1	5.96667	4.89566	3.15	2.56179	K14572		K00868	57.685	35.155	0.714466	0.331655	0.331655
mix_11814_1	18.2333	12.7273	17.2583	15.8438	K08493		K19877	98.7	46.1883	1.09552	0.793641	0.793641
mix_11815_1	16.2967	8.75383	15.73	15.1019	K08493		K07393	65.7267	68.6383	-0.0625357	0.042013	0.042013
mix_11838_1	219.48	119.228	156.745	138.474	K07874		K14528	32.6883	26.855	0.283585	0.084428	0.084428
mix_1183_1	1.82833	4.08828	1.165	1.71992	K12614		K10772	23.68	15.7783	0.585724	0.115559	0.115559
mix_11841_1	11.5167	7.50163	13.1417	10.7223	K17666		K15113	86.6033	51.1417	0.759923	0.523378	0.523378
mix_11842_1	15.14	10.8122	15.44	17.1872	K17666		K00164	547.973	317.277	0.788364	3.41066	3.41066
mix_1184_2	7.07167	4.98647	0.115	0.257148	K17764		K16569	34.2417	7.11333	2.26716	0.468791	0.468791
mix_1184_3	6.73167	9.87504	0	0	K18416		K02876	73.8167	42.72	0.789035	0.459758	0.459758
mix_1184_4	4.87833	8.29436	0	0	K18416		K12667	88.18	55.9817	0.655497	0.472488	0.472488
mix_1184_5	2.95	6.23259	0	0	K18416		K09647	22.0717	18.5733	0.248963	0.0505955	0.0505955
mix_11854_1	27.8483	14.5215	21.8983	22.3058	K02948		K08293	8.965	16.43	-0.873957	0.110971	0.110971
mix_11855_1	53.99	29.3084	65.6167	67.4306	K06890		K01293	203.25	157.388	0.368927	0.665246	0.665246
mix_11856_1	34.0933	17.4166	24.4667	17.7099	K02948		K01251	586.232	303.91	0.947827	4.2185	4.2185
mix_11858_2	1525.54	793.579	757.39	630.945	K02893		K10089	46.665	23.7367	0.975224	0.343287	0.343287
mix_11860_1	50.3117	27.6936	52.7833	57.0691	K06890		K03426	118.11	102.783	0.200525	0.221473	0.221473
mix_11861_2	0	0	0	0	K02893		K20457	45.125	24.97	0.853731	0.299211	0.299211
mix_11863_2	418.985	195.206	344.857	298.261	K17778		K00949	21.6933	17.935	0.274474	0.0543847	0.0543847
mix_11864_1	31.66	14.5907	21.035	20.3739	K01764		K01784	27.585	0.418333	6.04309	0.846133	0.846133
mix_11865_1	3.25	2.01931	2.14333	2.44873	K01764		K00586	52.0767	34.8717	0.578582	0.251534	0.251534
mix_1186_1	0	0	0.46	1.02859	K08912		K17784	110.478	82.7133	0.417572	0.403357	0.403357
mix_11872_1	10.6433	5.70252	5.435	6.06695	K20304		K05864	283.23	320.53	-0.178485	0.538811	0.538811
mix_11873_1	17.255	9.55265	14.4433	15.5749	K20304		K14538	182.678	72.8683	1.32594	1.6942	1.6942
mix_1187_2	0	0	0	0	K00422		K01739	126.05	73.0883	0.786283	0.782896	0.782896
mix_11884_1	14.325	12.8857	13.4317	22.7582	K11553		K04082	19.5183	12.19	0.679132	0.107671	0.107671
mix_11885_1	19.72	15.1813	17.1033	24.2354	K11553		K00685	39.8783	37.29	0.0968163	0.0373558	0.0373558
mix_11887_1	1.72333	2.74033	1.36	3.04105	K01426		K02739	77.4317	35.9983	1.10499	0.626697	0.626697
mix_11889_1	1.71667	1.99645	0.095	0.212426	K01426		K12183	11.9183	9.76167	0.287983	0.0312174	0.0312174
mix_1188_1	2.28333	3.25651	0.183333	0.409946	K14792		K17983	33.1083	19.78	0.743152	0.19652	0.19652
mix_11890_1	0.751667	0.768861	0.92	1.12749	K12765		K03063	78.465	44.695	0.811936	0.49999	0.49999
mix_11892_1	9.47833	6.55713	7.74833	8.12408	K10627		K08098	44.42	30.9417	0.521658	0.196565	0.196565
mix_11893_1	7.47	5.60622	10.3733	9.98604	K10627		K00555	87.065	45.9417	0.92229	0.613353	0.613353
mix_11896_1	470.632	293.513	264.818	256.925	K02973		K11767	14.9667	9.19833	0.702309	0.0848564	0.0848564
mix_11899_1	94.5833	71.2488	3.08167	4.37402	K02973		K15140	20.2767	27.66	-0.447981	0.107373	0.107373
mix_1189_1	1.82833	2.94038	0.278333	0.514924	K03457		K11560	73.23	42.44	0.78701	0.455167	0.455167
mix_118_1	0	0	3.56833	5.05292	K01875		K08329	33.3767	13.2783	1.32977	0.310201	0.310201
mix_11900_1	26.8067	17.792	21.6333	20.1231	K02973		K01868	171.218	93.2933	0.875991	1.15855	1.15855
mix_11901_1	324.18	211.571	8.995	7.47528	K02973		K01120	107.852	78.24	0.46307	0.430868	0.430868
mix_11902_1	7.26333	5.74347	2.39667	3.4141	K02973		K11879	37.775	25.445	0.57005	0.180193	0.180193
mix_11905_1	38.0717	14.9587	34.1317	27.8543	K17498		K04798	23.1283	8.39833	1.46149	0.230379	0.230379
mix_11906_1	21.585	9.8327	15.89	12.7789	K17498		K18587	80.3483	45.3367	0.82559	0.518821	0.518821
mix_11908_1	14.925	6.92298	14.8817	13.9923	K02202		K07541	63.145	56.3117	0.165235	0.0986919	0.0986919
mix_1190_1	32.8783	28.3239	1.42	1.23576	K16194		K16938	57.3167	20.17	1.50674	0.583763	0.583763
mix_11910_1	13.4933	8.61277	10.9367	9.3133	K02202		K02911	32.6333	32.45	0.00812788	0.00264495	0.00264495
mix_11912_1	0.471667	1.05468	4.18667	7.60981	K05863		K11558	8.11833	1.69333	2.26132	0.110936	0.110936
mix_11913_1	4.29333	1.85819	5.15	5.61389	K05863		K09043	141.132	80.6417	0.807444	0.895348	0.895348
mix_11916_1	22.6067	15.328	16.9367	15.4519	K10686		K08900	28.2833	16.6917	0.760824	0.17109	0.17109
mix_11924_1	22.7133	12.0927	11.23	8.4035	K15331		K11398	38.8583	14.7833	1.39425	0.37395	0.37395
mix_11926_1	22.1683	19.0487	16.585	14.3988	K15331		K01893	169.638	94.3717	0.846037	1.11681	1.11681
mix_1192_1	0	0	0	0	K01507		K11253	2076.6	866.447	1.26104	18.5565	18.5565
mix_11932_1	56.1467	27.4229	29.6717	29.4786	K01693		K01817	33.9567	30.1783	0.170182	0.054573	0.054573
mix_11933_1	48.5217	30.4206	38.2817	39.1136	K01693		K08342	42.4483	23.765	0.83687	0.27706	0.27706
mix_11936_1	0	0	6.29167	8.62582	K01915		K15544	16.8667	9.825	0.779646	0.10405	0.10405
mix_11937_1	0	0	0.383333	0.857159	K01915		K03024	18.6367	15.2	0.294073	0.0497522	0.0497522
mix_11938_1	3.39667	4.49116	0.296667	0.438356	K01915		K01238	1989.62	991.112	1.00538	14.9838	14.9838
mix_11939_1	0.996667	1.42232	11.7683	18.4133	K01915		K08490	44.62	27.6533	0.690237	0.249429	0.249429
mix_1193_1	0	0	0	0	K01507		K02867	120.748	98.865	0.288471	0.316761	0.316761
mix_11945_1	20.44	11.4583	17.055	14.8486	K19932		K08564	41.405	52.335	-0.337971	0.158407	0.158407
mix_11946_1	15.0517	8.44195	15.195	12.3003	K06134		K02136	642.52	323.513	0.989916	4.78146	4.78146
mix_11947_2	6.42833	5.39707	6.73333	6.83201	K06134		K01900	128.798	101.432	0.344606	0.396693	0.396693
mix_11947_3	0	0	0.785	1.28621	K20102		K07034	191.113	130.837	0.546662	0.879988	0.879988
mix_11948_2	56.4517	40.4474	31.5667	31.1415	K10967		K09467	85.405	17.3167	2.30216	1.18241	1.18241
mix_11949_1	30.1783	20.5492	13.9367	13.9322	K10967		K03104	106.058	88.7067	0.257744	0.250997	0.250997
mix_1194_1	37.45	28.1824	1.51	1.48517	K12603		K18726	37.6833	19.8033	0.928183	0.266791	0.266791
mix_11957_1	8.37833	6.87529	10.6117	10.2917	K01689		K17989	21.095	19.8533	0.0875198	0.017919	0.017919
mix_11960_1	56.565	30.6021	36.1983	33.6728	K00818		K03248	140.553	67.7017	1.05385	1.09735	1.09735
mix_11961_1	45.5683	25.709	33.8917	28.7826	K00818		K14263	22.1883	26.9417	-0.280038	0.0687913	0.0687913
mix_11962_1	4.83667	10.8151	0	0	K03231		K07407	8.82167	0.21	5.39259	0.24352	0.24352
mix_11964_1	1.21167	2.70937	0.283333	0.633553	K03231		K17081	154.65	94.2617	0.714264	0.888943	0.888943
mix_11971_2	10.0683	6.68806	12.5267	15.7171	K13239		K10761	30.16	21.1383	0.512775	0.131522	0.131522
mix_11973_2	7.46	5.11715	12.1267	10.2593	K13239		K03023	121.612	66.4467	0.872013	0.819946	0.819946
mix_11978_1	14.1233	8.44547	10.51	8.5227	K11547		K12600	40.17	19.4333	1.04759	0.312198	0.312198
mix_11979_2	8.86333	4.54549	5.29333	4.24207	K11547		K00235	503.327	344.458	0.547166	2.31939	2.31939
mix_11985_1	11.9033	8.03888	12.4017	14.2039	K17797		K10873	27.7683	17.1883	0.692011	0.155553	0.155553
mix_11990_2	2.375	2.92866	3.875	7.37362	K17797		K07297	606.277	587.59	0.0451665	0.269614	0.269614
mix_11996_1	5.27333	3.4323	3.855	4.87661	K15442		K02433	39.325	21.5267	0.869322	0.264498	0.264498
mix_11998_1	6.565	14.6798	5.29	11.8288	K15442		K01899	119.465	63.4883	0.912025	0.83429	0.83429
mix_119_1	0.581667	0.96534	3.815	7.2065	K01875		K05535	202.23	139.91	0.531498	0.909234	0.909234
mix_12000_1	0	0	12.2117	27.3061	K15442		K11427	14.0733	16.4533	-0.225416	0.034406	0.034406
mix_12002_1	0	0	0	0	K15442		K01104	76.76	21.6733	1.82443	0.897925	0.897925
mix_12005_1	3.01833	2.32907	4.20333	3.36782	K15442		K11375	53.81	30.9383	0.798479	0.338349	0.338349
mix_12019_1	17.0783	10.1858	8.98833	9.02319	K00761		K02933	33.0483	24.76	0.416566	0.120405	0.120405
mix_12021_1	13.535	8.45096	16.3517	14.2747	K03325		K02906	39.5617	24.4433	0.694662	0.222309	0.222309
mix_12022_2	46.21	28.1139	51.815	42.9963	K03325		K17978	104.672	75.9233	0.463256	0.418308	0.418308
mix_12024_1	5.87	4.98644	7.165	5.62555	K16575		K12879	117.228	76.7067	0.611897	0.593342	0.593342
mix_12025_1	6.95167	3.62303	4.00667	2.89701	K16575		K14709	288.045	402.262	-0.48184	1.66309	1.66309
mix_12030_1	83.915	43.3596	80.5617	84.71	K09274		K15079	10.885	7.3	0.576373	0.0524067	0.0524067
mix_12035_1	377.443	323.481	13.2217	18.8999	K11252		K17607	28.995	32.6717	-0.172236	0.0531061	0.0531061
mix_12036_1	5.72167	8.18071	12.7467	28.5024	K11252		K12858	39.2017	20.2017	0.956441	0.284079	0.284079
mix_1203_1	4.60833	10.3045	0	0	K17422		K06961	102.347	77.9967	0.39198	0.353455	0.353455
mix_1203_2	10.9317	7.24184	0.551667	0.815606	K13754		K02208	30.1633	10.92	1.46582	0.301104	0.301104
mix_12040_2	139.675	69.8333	116.232	112.316	K11252		K03232	1064.29	490.603	1.11726	8.68615	8.68615
mix_12041_1	10.4867	6.42749	10.6567	11.0575	K17661		K14968	8.11333	6.46333	0.328016	0.0239069	0.0239069
mix_12042_1	11.2633	7.57724	12.6967	11.6684	K17661		K08499	18.6567	11.13	0.745238	0.110991	0.110991
mix_12043_1	3.23333	3.4636	4.30333	4.08517	K18600		K18804	33.26	25.2667	0.396553	0.116045	0.116045
mix_12044_1	9.24667	7.52942	11.7933	15.751	K18600		K20346	82.7967	24.4417	1.76023	0.943821	0.943821
mix_12045_1	15.725	9.07865	7.66667	6.65411	K14781		K01409	91.84	28.465	1.68993	1.01654	1.01654
mix_1204_1	2.16667	4.84481	0	0	K02723		K13341	76.9717	14.775	2.38117	1.09232	1.09232
mix_12051_1	22.5967	23.9307	10.5283	17.1268	K06669		K14777	78.6817	45.5633	0.788154	0.489621	0.489621
mix_12052_1	12.44	7.71226	10.25	9.68874	K06669		K00004	5.35	4.21667	0.343436	0.0164277	0.0164277
mix_12053_1	22.115	16.2918	13.11	10.0146	K06687		K03264	1064.53	677.47	0.651988	5.67881	5.67881
mix_12055_1	12.685	8.88779	9.615	8.20878	K06687		K05925	1.63333	1.31	0.318252	0.00468362	0.00468362
mix_12056_1	1.835	2.08282	1.22667	1.58877	K06669		K02266	470.183	314.398	0.58063	2.27776	2.27776
mix_12058_1	3.59	3.12562	2.59167	2.5543	K15053		K02685	20.5283	10.3433	0.988915	0.152647	0.152647
mix_12065_1	55.6967	32.3543	35.325	27.7048	K02926		K00413	751.472	457.707	0.715295	4.3246	4.3246
mix_12065_2	797.562	443.655	398.128	362.293	K02964		K10398	39.77	20.2733	0.972097	0.29184	0.29184
mix_12066_1	38.94	14.5596	32.5483	26.7008	K02926		K11339	38.35	17.545	1.12817	0.315294	0.315294
mix_12069_1	7.16167	16.014	0	0	K16575		K03685	48.46	21.14	1.19682	0.416493	0.416493
mix_12078_1	9.93333	6.05171	8.195	7.69556	K20295		K06009	691.115	553.222	0.321068	1.99758	1.99758
mix_12079_1	20.3583	12.26	15.9233	13.3504	K20295		K03841	303.953	257.27	0.240567	0.675058	0.675058
mix_1207_1	0	0	3.69833	8.26972	K17800		K13509	126.012	71.1733	0.824149	0.812549	0.812549
mix_12080_1	4.88167	3.36014	6.87167	7.092	K01130		K02734	104.505	56.8783	0.877621	0.708167	0.708167
mix_12081_1	4.87	2.6623	4.63	4.98056	K01130		K12818	68.27	29.705	1.20055	0.588117	0.588117
mix_12084_1	0	0	0	0	K14851		K03424	49.3917	39.2367	0.332065	0.147152	0.147152
mix_12084_2	61.7467	34.6015	50.6833	45.4709	K13989		K11370	55.3633	49.8867	0.150277	0.079083	0.079083
mix_12085_2	33.3917	13.8988	26.8333	22.6278	K13989		K12274	75.9133	41.7833	0.861426	0.506935	0.506935
mix_12086_1	6.925	4.75346	4.63667	4.38685	K11367		K15071	22.9117	9.56667	1.25999	0.204613	0.204613
mix_12087_1	10.2967	8.51665	8.02833	6.53212	K11367		K02258	62.2133	43.415	0.51903	0.274121	0.274121
mix_12089_1	34.0617	22.9389	18.79	18.77	K01599		K00645	54.705	51.65	0.0829044	0.0440865	0.0440865
mix_1208_1	22.59	17.4505	0.73	0.682007	K14556		K05389	26.18	23.99	0.126032	0.0316151	0.0316151
mix_12090_1	37.2133	25.4018	24.2883	25.9269	K01599		K12795	57.3167	53.7283	0.0932716	0.0517867	0.0517867
mix_12091_1	20.1017	13.7345	16.8233	15.8976	K00670		K17793	77.2267	110.1	-0.511643	0.479222	0.479222
mix_12092_1	90.3433	61.1217	53.88	52.5898	K04802		K14565	306.493	160.955	0.929198	2.17176	2.17176
mix_12092_2	0	0	0	0	K00670		K11090	110.035	62.1933	0.823131	0.708832	0.708832
mix_12094_1	83.03	65.8006	51.35	59.2979	K04802		K14783	146.255	94.965	0.623018	0.751422	0.751422
mix_12095_1	55.5683	26.5395	36.7333	30.3117	K02895		K00838	575.283	315.41	0.867044	3.86135	3.86135
mix_12096_1	12.5033	12.3221	4.23667	4.89682	K12194		K12414	19.7183	14.9617	0.398267	0.0690594	0.0690594
mix_12097_1	15.375	8.14546	13.3383	11.4849	K12194		K01626	722.353	398.23	0.859103	4.81348	4.81348
mix_12107_1	6.66	3.63359	4.38833	3.78266	K02181		K12578	9.53333	7.62833	0.321613	0.0275971	0.0275971
mix_12110_1	6.60333	8.07771	9.37	9.94675	K02181		K02922	248.038	54.8983	2.17573	3.29554	3.29554
mix_12111_1	126.567	77.073	118.41	111.517	K00227		K17497	266.285	120.528	1.1436	2.2118	2.2118
mix_12112_1	102.653	72.7848	107.783	103.932	K00227		K02866	3541.08	1782.11	0.990605	26.3659	26.3659
mix_12113_1	3.295	2.70437	2.19333	2.81876	K12855		K11376	59.4	39.8217	0.576909	0.28621	0.28621
mix_12114_1	4.69333	4.52449	2.71167	2.34323	K12855		K07277	29.6833	13.0533	1.18523	0.253265	0.253265
mix_12127_1	17.1433	14.3269	0.165	0.263929	K01568		K15458	109.122	77.065	0.50179	0.467133	0.467133
mix_12129_1	0.9	1.13053	6.83167	12.0231	K14835		K18798	45.7417	26.2917	0.798903	0.287738	0.287738
mix_12130_1	0.19	0.424853	5.20833	8.35892	K08150		K01783	80.2633	54.9767	0.545922	0.369152	0.369152
mix_12131_1	1.71167	2.84074	3.57833	7.25336	K08150		K14814	55.3133	42.0467	0.395636	0.192596	0.192596
mix_12132_1	0	0	3.98	5.66896	K08150		K17891	110.132	99.0233	0.153389	0.16041	0.16041
mix_12137_1	3.94	2.82129	2.65	3.02888	K06636		K07973	77.775	62.0617	0.325604	0.227657	0.227657
mix_12139_1	10.0383	7.2748	5.98667	6.54884	K06636		K20369	73.63	43.63	0.754973	0.442641	0.442641
mix_12140_1	4.2	2.47966	3.51833	3.31315	K06636		K12817	16.375	11.8283	0.469248	0.0661718	0.0661718
mix_12153_1	10.3617	5.48306	8.33667	7.26957	K12867		K03139	28.5833	11.0617	1.36961	0.27149	0.27149
mix_12154_1	10.5417	6.64589	7.69167	6.64427	K12867		K06874	109.977	68.2233	0.68886	0.613775	0.613775
mix_12160_1	8.65	13.0395	49.8117	76.6238	K02882		K02219	76.9033	60.9917	0.334434	0.230584	0.230584
mix_12161_1	162.962	112.462	81.985	79.104	K02882		K02993	1427.75	465.977	1.61541	15.2958	15.2958
mix_12162_1	0	0	21.1567	28.051	K02882		K11344	125.58	110.392	0.185975	0.219425	0.219425
mix_12163_1	1563.46	1001.43	891.68	803.381	K02882		K14545	94.5983	76.835	0.300051	0.257194	0.257194
mix_12164_1	0	0	13.9867	17.3422	K02882		K19841	50.9067	50.7267	0.00511024	0.00259685	0.00259685
mix_12167_1	0	0	1.18667	2.27094	K02882		K03650	37.0017	16.6733	1.15005	0.308644	0.308644
mix_12169_1	15.325	21.4035	3.11833	4.46543	K02882		K14834	123.833	40.27	1.62062	1.32975	1.32975
mix_12170_1	0.668333	1.49444	3.49833	3.77355	K02882		K02997	1015.68	393.46	1.36816	9.63971	9.63971
mix_12171_1	0.311667	0.580759	10.4983	18.6773	K11434		K02875	1136.52	497.368	1.19223	9.73982	9.73982
mix_12172_1	18.555	13.1707	15.2133	14.8887	K10365		K17678	34.61	25.5733	0.436549	0.131365	0.131365
mix_12173_1	29.1667	21.6644	16.5067	16.257	K10365		K08850	13.8217	4.51667	1.6136	0.147954	0.147954
mix_12176_1	9.62833	7.35125	4.85667	4.3366	K10866		K10401	59.1733	10.575	2.48429	0.866375	0.866375
mix_12178_1	5.38167	3.40673	5.50833	4.89549	K10866		K09584	141.69	69.1383	1.03518	1.09123	1.09123
mix_12179_1	9.13333	4.0218	6.78167	6.65529	K17908		K10983	29.8383	33.785	-0.179216	0.0570116	0.0570116
mix_1217_1	57.8383	41.0024	1.29833	1.06586	K06174		K00102	400.253	329.202	0.281942	1.02832	1.02832
mix_12180_1	11.775	4.78767	11.03	9.41333	K17908		K12897	39.4667	1.20667	5.03154	1.02325	1.02325
mix_12184_1	57.4533	27.5465	46.4417	39.348	K02731		K17676	15.28	10.0083	0.610443	0.0771854	0.0771854
mix_12187_1	555.165	417.933	415.845	483.814	K02127		K02963	224.877	170.327	0.40083	0.792046	0.792046
mix_12189_1	5.865	4.52704	5.04333	4.53262	K10752		K02727	62.0067	27.965	1.1488	0.516798	0.516798
mix_12190_1	9.31333	5.34962	10.2517	10.9584	K10752		K05917	378.462	285.888	0.404695	1.3443	1.3443
mix_1219_1	16.8067	14.7646	0.321667	0.408306	K06640		K00121	132.64	117.53	0.174487	0.218257	0.218257
mix_1219_2	1.66167	1.5799	0	0	K10997		K13535	63.5917	24.3333	1.3859	0.609278	0.609278
mix_12203_2	19.2933	11.135	17.0033	15.5841	K15507		K04649	245.477	162.305	0.596878	1.21698	1.21698
mix_12204_1	21.7667	14.6547	13.455	10.8668	K15507		K17732	188.478	52.7017	1.83848	2.21702	2.21702
mix_12205_1	0.663333	0.571713	2.155	4.19183	K11541		K20521	86.785	52.7133	0.719278	0.50169	0.50169
mix_12206_2	6.48	4.89376	5.59667	5.34611	K01426		K11324	12.9183	8.39833	0.621245	0.0662144	0.0662144
mix_12207_1	3.52667	2.36077	3.38167	3.13646	K01426		K10731	13.6233	13.8533	-0.0241534	0.00331828	0.00331828
mix_12213_1	9.89	6.86892	11.3317	10.5689	K10579		K03131	54.905	25.305	1.11752	0.448179	0.448179
mix_12224_1	4.745	6.38564	3.25333	3.50266	K01267		K00507	1739.76	978.67	0.829998	11.2815	11.2815
mix_12225_1	11.915	6.75575	11.86	12.6862	K01267		K03848	59.2333	40.25	0.55742	0.27727	0.27727
mix_12227_1	9.54833	6.74712	6.07833	6.35224	K01267		K00968	52.53	39.5567	0.409221	0.188419	0.188419
mix_1222_1	54.2483	43.0104	1.765	2.06432	K11262		K03019	29.2917	9.70667	1.59344	0.310708	0.310708
mix_12234_1	6.71667	4.17611	4.485	4.34844	K03132		K00228	88.6533	53.7967	0.720658	0.513289	0.513289
mix_12235_1	3.52667	2.65618	3.1	3.29113	K03132		K00036	254.272	185.857	0.45218	0.995087	0.995087
mix_1223_1	40.9017	32.2599	0.943333	1.17099	K14007		K09272	75.3283	47.4133	0.6679	0.409896	0.409896
mix_12242_1	361.312	169.483	359.847	350.751	K19717		K04739	80.0983	84.2867	-0.0735322	0.060438	0.060438
mix_12243_1	331.507	131.16	290.548	250.359	K19717		K12880	18.3733	14.76	0.315921	0.0523375	0.0523375
mix_12245_1	27.895	14.3424	23.33	23.2697	K17791		K14841	57.765	35.1583	0.716329	0.332818	0.332818
mix_12245_2	3.29333	4.66307	1.91167	3.38391	K03469		K00030	1131.87	682.618	0.729555	6.61884	6.61884
mix_12246_1	3.75667	2.15646	2.45333	2.28962	K03469		K01265	175.883	75.1617	1.22655	1.5396	1.5396
mix_12247_1	2.75	2.11769	3.06833	3.28241	K03469		K17262	44.6883	19.0933	1.22683	0.391246	0.391246
mix_12249_1	33.2583	24.4641	31.5867	32.1879	K17791		K03025	41.55	21.4967	0.950736	0.299704	0.299704
mix_1224_1	0.895	1.08072	0.328333	0.734176	K01883		K17970	50.3267	28.335	0.828738	0.325949	0.325949
mix_12252_1	2.55667	3.87209	1.20667	1.77565	K12768		K01556	33.125	38.8433	-0.229747	0.0826724	0.0826724
mix_12254_2	2.35	1.65058	2.03333	2.63071	K12768		K06215	311.965	120.14	1.37667	2.97432	2.97432
mix_12258_1	69.25	39.9396	56.3333	56.9853	K18693		K08869	151.458	110.265	0.457946	0.599276	0.599276
mix_12265_1	33.6667	21.6351	16.595	14.5348	K18693		K19950	46.345	22.1817	1.06305	0.364235	0.364235
mix_12270_1	68.8817	38.2122	91.2567	91.2023	K01440		K19808	41.5233	36.535	0.184643	0.0720646	0.0720646
mix_12272_1	5.41167	5.8877	9.745	7.73151	K18731		K12412	71.2867	47.1467	0.596476	0.353213	0.353213
mix_12275_1	0	0	12.005	12.9128	K02873		K19898	8.8	7.59	0.213404	0.0174884	0.0174884
mix_12276_1	0	0	0	0	K02873		K12481	36.5133	20.3133	0.845996	0.240376	0.240376
mix_12277_1	7.59333	10.7254	26.7767	42.9767	K02873		K08197	79.6083	65.9483	0.271583	0.197654	0.197654
mix_12279_1	1750.41	1253.44	986.985	981.06	K02873		K06677	70.6183	34.9083	1.01647	0.536324	0.536324
mix_1227_1	80.195	63.8791	2.03	2.59059	K03260		K01772	46.3983	33.4467	0.472211	0.188518	0.188518
mix_12281_1	0.735	1.03945	5.17	7.49817	K00227		K14838	146.442	66.51	1.13868	1.21242	1.21242
mix_12286_1	16.105	9.23257	9.255	8.90813	K04708		K09518	47.1283	23.9467	0.97677	0.34712	0.34712
mix_12287_1	19.2867	10.8207	13.6233	14.3667	K04708		K14015	39.4683	21.095	0.903795	0.273684	0.273684
mix_12290_2	0	0	0	0	K11552		K14788	105.01	63.7683	0.719615	0.607277	0.607277
mix_12291_1	8.78667	6.32197	5.205	4.31497	K11552		K04482	57.1617	33.3433	0.77765	0.351906	0.351906
mix_12293_1	5.12667	3.70204	4.72667	5.22986	K11552		K10415	9.68333	7.04667	0.458563	0.0383588	0.0383588
mix_12295_1	5.10167	5.48919	6.69	9.20013	K08497		K06123	60.7217	64.565	-0.0885409	0.055465	0.055465
mix_12297_1	5.70833	4.06108	5.91	5.584	K08497		K01867	145.177	78.9417	0.878951	0.984945	0.984945
mix_12299_1	72.7933	48.2141	55.4633	55.5241	K03115		K02858	199.815	80.9383	1.30377	1.83019	1.83019
mix_12300_1	77.145	39.6196	58.4717	54.7935	K03115		K19704	74.555	54.3317	0.456512	0.294191	0.294191
mix_12301_1	27.7283	17.0844	17.5617	18.2275	K00286		K18181	95.0567	64.6783	0.555505	0.443668	0.443668
mix_12303_1	8.12	6.29059	6.76333	7.20512	K00286		K14022	35.8167	7.44	2.26726	0.49037	0.49037
mix_12304_1	8.14167	5.33988	6.745	5.03385	K20247		K17053	59.94	24.9467	1.26467	0.536769	0.536769
mix_12305_1	49.6533	25.4278	40.0683	35.9536	K20247		K08339	22.42	11.2217	0.998499	0.167956	0.167956
mix_12306_1	6.37167	8.52837	1.355	2.53143	K00088		K03114	54.6767	28.2733	0.951483	0.394628	0.394628
mix_12312_1	156.155	91.2525	124.347	125.163	K00762		K13162	38.75	34.0233	0.187672	0.0682875	0.0682875
mix_12314_1	29.935	16.4975	24.57	21.7538	K03105		K09500	83.97	34.5483	1.28126	0.759263	0.759263
mix_12315_1	0	0	0	0	K15220		K00974	33.2517	16.7883	0.985968	0.246689	0.246689
mix_12315_2	26.8	16.8743	13.1267	11.5487	K03105		K03106	52.2583	23.1333	1.17569	0.443185	0.443185
mix_12316_1	101.807	41.9157	61.1417	60.5518	K00762		K14842	153.112	77.785	0.97702	1.12795	1.12795
mix_12317_1	4.83167	3.69955	7.25	7.46142	K12827		K20311	53.2417	34.09	0.643207	0.280862	0.280862
mix_12318_1	12.1133	8.98927	12.6367	11.3623	K12827		K19306	64.795	54.4017	0.252232	0.150326	0.150326
mix_12325_1	12.69	14.6784	8.24167	9.16055	K14969		K02898	1340.3	583.99	1.19854	11.5318	11.5318
mix_12327_1	7.56	4.83954	5.86833	5.03143	K15446		K11575	10.4783	7.945	0.39929	0.0367813	0.0367813
mix_12328_1	8.19333	6.51176	5.35	5.35525	K15446		K01078	82.6517	25.4183	1.70117	0.91923	0.91923
mix_12335_1	0.395	0.438359	8.775	18.3901	K11294		K01942	59.0933	25.5117	1.21184	0.512638	0.512638
mix_12336_1	1.95667	4.37524	17.2517	25.0814	K11294		K02604	24.6683	15.2567	0.69322	0.138384	0.138384
mix_12339_1	71.0667	46.8857	54.305	47.9666	K07748		K10352	121.457	31.4167	1.95084	1.49116	1.49116
mix_12349_1	380.857	274.097	234.562	220.851	K03626		K19386	92.2683	72.5433	0.346993	0.285942	0.285942
mix_1234_1	4.09	5.3261	0.04	0.0894427	K11126		K12668	229.493	108.3	1.08342	1.82986	1.82986
mix_1235_1	0	0	2.67	5.9703	K14808		K18043	85.2033	52.2983	0.704145	0.484105	0.484105
mix_1236_1	0	0	1.35167	3.02242	K14808		K07827	146.085	85.6283	0.770648	0.892847	0.892847
mix_12372_1	37.0567	23.8985	27.245	27.0645	K06684		K08139	2603.28	1510.62	0.785186	16.1509	16.1509
mix_12377_1	7.41667	4.52144	4.65	4.44468	K10858		K02728	137.747	99.69	0.466497	0.553817	0.553817
mix_12381_1	11.225	18.5653	1.335	2.98515	K02883		K15732	34.9633	18.6867	0.903833	0.242453	0.242453
mix_12383_1	1594.33	1154.62	834.512	826.037	K02883		K14776	91.8317	49.8833	0.880434	0.623853	0.623853
mix_12384_1	3.00667	6.72311	15.2717	30.2093	K02883		K11849	68.575	46.8083	0.550917	0.317833	0.317833
mix_12385_1	97.3433	93.9762	76.74	91.2259	K02883		K09464	189.653	172.135	0.139824	0.252934	0.252934
mix_12387_1	0	0	13.9567	17.8752	K02883		K17785	189.087	138.323	0.451003	0.738315	0.738315
mix_12390_1	0	0	3.26	6.29737	K02883		K17802	14.0083	2.23	2.65117	0.215253	0.215253
mix_12396_1	7.81667	5.4096	7.185	6.09781	K12608		K01836	74.51	37.3583	0.996004	0.557107	0.557107
mix_12397_1	12.5617	6.74707	11.1467	9.1428	K12608		K02259	251.13	207.792	0.273297	0.627109	0.627109
mix_123_1	1.36833	2.77501	0.373333	0.613152	K07374		K11885	41.155	19.855	1.05157	0.32078	0.32078
mix_1241_1	17.285	13.4204	1.1	1.78609	K03327		K01247	25.16	22.0767	0.18861	0.0445464	0.0445464
mix_12422_1	5.42167	4.33729	4.55667	4.71798	K13099		K18046	14.0017	16.905	-0.271851	0.0420101	0.0420101
mix_12424_2	0.98	1.38863	1.53833	2.05983	K13099		K11244	195.315	132.63	0.558396	0.915615	0.915615
mix_12426_1	16.3083	8.05534	12.8933	10.0211	K00915		K04460	68.12	31.3183	1.12107	0.557387	0.557387
mix_12428_1	70.8633	27.5969	53.7483	43.6621	K03120		K17619	37.6883	40.4433	-0.101784	0.0397627	0.0397627
mix_1242_1	92.76	61.5346	2.97	4.37973	K09522		K02987	1815.5	709.053	1.3564	17.1214	17.1214
mix_12436_1	1.54	2.71919	14.4167	20.3971	K02962		K09549	24.2617	44.175	-0.864551	0.295835	0.295835
mix_12438_1	1.22	1.70012	4.71	8.16197	K03235		K12670	150.922	44.8567	1.75041	1.71346	1.71346
mix_12439_1	12.6767	6.34922	11.9733	11.0506	K07117		K17917	52.4583	15.7417	1.73658	0.592175	0.592175
mix_12440_1	9.53667	5.66969	11.6417	9.4783	K07117		K03016	187.918	114.477	0.715052	1.08114	1.08114
mix_12443_1	39.5017	23.0248	20.7	18.8001	K02725		K03352	23.0783	12.1733	0.922815	0.162654	0.162654
mix_12449_1	0.655	0.945123	1.665	2.91797	K00706		K08739	12.38	12.5883	-0.024076	0.00300568	0.00300568
mix_1244_1	1.30167	1.86378	0	0	K00111		K02735	156.988	107.307	0.548918	0.725381	0.725381
mix_12450_1	1.08333	1.77428	4.265	8.04116	K00706		K18172	5.98167	1e-08	29.156	0.872007	0.872007
mix_12459_1	3.115	5.86067	14.0133	20.5054	K02991		K15428	56.1533	31.2567	0.845208	0.369398	0.369398
mix_12462_1	20.19	12.1165	14.5467	13.6176	K17508		K07905	225.32	129.353	0.800658	1.41986	1.41986
mix_12465_1	6.805	10.3232	2.89333	4.105	K14327		K10258	226.238	148.053	0.611726	1.14482	1.14482
mix_12465_2	0	0	0	0	K17508		K01756	185.672	120.853	0.619496	0.949456	0.949456
mix_12466_1	14.85	6.56002	11.7883	9.15879	K17508		K15148	34.1817	29.79	0.198395	0.0634582	0.0634582
mix_12467_1	1.70667	3.24635	11.4167	20.6866	K14564		K10846	28.1417	15.925	0.821414	0.180985	0.180985
mix_12473_1	5.97167	4.08273	3.445	3.18104	K15151		K03133	89.8167	62.7017	0.518479	0.395388	0.395388
mix_12477_1	2.015	2.49237	1.835	2.316	K15151		K07375	181.278	50.7383	1.83706	2.13114	2.13114
mix_1247_1	0.753333	1.6845	1.49833	2.53338	K14290		K02956	391.793	220.857	0.826982	2.53325	2.53325
mix_12480_2	20.3367	12.6474	14.6817	13.4648	K09539		K00641	452.08	324.303	0.479234	1.86035	1.86035
mix_12482_1	5.4	3.78437	5.14	5.43002	K01669		K17275	81.6633	37.2017	1.13432	0.674155	0.674155
mix_12483_1	6.10333	4.6444	6.76833	7.30095	K01669		K08158	155.212	110.25	0.493458	0.654971	0.654971
mix_12484_1	32.3283	17.248	22.4083	17.7725	K17428		K02214	15.815	6.52	1.27835	0.14276	0.14276
mix_12487_1	21.5667	11.4853	18.0883	15.3671	K03660		K15111	42.8483	19.2417	1.15501	0.358571	0.358571
mix_12488_1	17.0383	10.4591	13.1267	10.4651	K17428		K11271	30.4367	17.7167	0.780703	0.187967	0.187967
mix_1248_1	3.005	4.48523	0	0	K16945		K14854	59.1117	34.0567	0.795506	0.37058	0.37058
mix_12491_1	14.0667	8.49856	10.755	10.4554	K12592		K01866	195.12	105.013	0.893789	1.34128	1.34128
mix_12494_1	14.6183	11.1914	8.19167	7.54397	K12592		K02977	7.26667	1.18667	2.61438	0.110501	0.110501
mix_1249_1	0.54	1.20748	0	0	K16945		K08770	5789.25	2066.24	1.48637	58.3809	30
mix_12531_2	8.91333	5.0468	5.99	4.87815	K15322		K00844	703.115	757.665	-0.107799	0.787356	0.787356
mix_12532_2	5.16667	3.4988	4.68333	3.56089	K15322		K11766	17.03	10.3233	0.72217	0.0987687	0.0987687
mix_12534_2	0	0	0	0	K15322		K15040	707.692	480.232	0.55939	3.32256	3.32256
mix_12538_1	21.2917	20.7738	14.3983	13.1655	K11680		K00486	32.48	26.5967	0.288306	0.0851608	0.0851608
mix_12539_1	257.363	147.123	179.228	202.24	K11251		K15283	128.172	83.2483	0.622584	0.658134	0.658134
mix_12540_3	8.055	5.83216	3.97833	4.26889	K11680		K15081	20.7217	15.4333	0.42509	0.0768457	0.0768457
mix_12541_1	6.50833	9.34472	21.415	30.3357	K02870		K14563	358.577	159.182	1.17161	3.03305	3.03305
mix_12542_1	8.50667	14.3502	34.7383	52.9094	K02870		K17069	565.332	467.823	0.273134	1.41095	1.41095
mix_1254_1	1283	733.625	20.6217	21.179	K02918		K01855	34.785	14.2717	1.28531	0.315265	0.315265
mix_12552_2	0	0	0	0	K01092		K01487	26.7133	24.2333	0.140567	0.0358071	0.0358071
mix_12555_1	1.09833	1.57826	5.63333	9.82784	K00948		K10884	24.8417	11.2867	1.13814	0.205596	0.205596
mix_12558_1	7.65833	4.61453	2.23833	2.00836	K16732		K14812	43.095	20.5717	1.06686	0.339618	0.339618
mix_12559_1	3.15833	2.99999	1.32167	1.39239	K16732		K00789	1062.22	669.757	0.665371	5.76203	5.76203
mix_12563_1	1409.72	922.25	1297.32	1506.95	K09568		K00052	49.3133	48.205	0.032795	0.0159906	0.0159906
mix_12563_2	0.246667	0.369309	0.83	0.675426	K11399		K04487	168.658	111.245	0.600363	0.840218	0.840218
mix_12564_2	1.53667	1.70263	0.271667	0.409407	K11399		K07566	55.28	35.32	0.646272	0.292761	0.292761
mix_12573_1	0	0	0	0	K02905		K00987	46.6683	12.1933	1.93635	0.569884	0.569884
mix_12575_1	16.12	13.8214	18.98	22.3054	K15154		K17408	114.987	80.51	0.514227	0.502648	0.502648
mix_12576_1	12.8217	9.63114	8.68833	10.6139	K15154		K18477	45.385	26.285	0.787976	0.282371	0.282371
mix_12578_1	4.67167	2.5658	7.81667	6.19227	K15154		K18278	18.2317	18.88	-0.0504123	0.00935442	0.00935442
mix_12584_1	0.175	0.247504	5.62667	8.91177	K14792		K02915	575.047	30.7233	4.22627	12.8007	12.8007
mix_12590_1	10.145	6.80445	10.53	8.86972	K19788		K11230	90.915	36.2117	1.32806	0.844162	0.844162
mix_12594_1	6.74333	4.15866	4.22	3.09329	K18342		K12345	19.4167	17.6867	0.134633	0.0249767	0.0249767
mix_12596_1	0	0	0.731667	1.63606	K18342		K13344	32.8233	22.3233	0.556169	0.153354	0.153354
mix_12598_2	4.16	2.31927	3.02	2.97342	K19788		K15175	46.425	25.3933	0.870452	0.312572	0.312572
mix_12599_1	4.105	3.17877	5.33	5.93933	K18342		K08272	58.0283	36.1517	0.682695	0.321481	0.321481
mix_1259_1	0	0	4.16833	4.68219	K11541		K12190	24.4233	21.1767	0.205785	0.0469189	0.0469189
mix_12600_1	1.81833	1.53462	3.71	3.62758	K19788		K14536	43.7617	13.9667	1.64768	0.475589	0.475589
mix_12603_1	49.1267	27.4692	37.675	34.5296	K01551		K14799	90.745	53.1383	0.772065	0.555437	0.555437
mix_12606_1	17.6467	11.6534	13.685	12.2739	K11303		K06316	41.4233	16.5	1.32798	0.384604	0.384604
mix_12607_1	9.82333	7.06649	13.3483	13.2617	K11303		K03015	40.6467	26.2017	0.633478	0.211735	0.211735
mix_12608_1	3.96	2.48644	2.56167	2.56416	K11303		K11518	411.337	270.195	0.606319	2.06613	2.06613
mix_1260_1	11.0517	15.7027	0	0	K18748		K01469	105.098	42.035	1.32208	0.972608	0.972608
mix_12610_2	0	0	0	0	K12188		K02213	82.3667	43.11	0.934038	0.586	0.586
mix_12611_1	10.9017	6.53283	12.41	11.3942	K12584		K11788	110.975	54.3567	1.02971	0.851215	0.851215
mix_12613_1	22.955	15.2538	23.545	23.5886	K12584		K01953	551.662	286.898	0.943244	3.95483	3.95483
mix_12615_1	41.23	19.9652	26.5167	20.2042	K07390		K15158	84.4433	44.2533	0.932197	0.599853	0.599853
mix_12616_1	48.6433	32.1151	48.915	39.8107	K07390		K09523	21.045	19.905	0.0803466	0.016451	0.016451
mix_12618_1	13.72	7.34126	10.395	8.11992	K01922		K11400	41.27	21.195	0.961369	0.30026	0.30026
mix_12619_1	14.1767	9.72737	12.5633	10.4314	K01922		K14863	200.615	95.6417	1.06872	1.58307	1.58307
mix_1261_1	12.94	9.70225	0.333333	0.335195	K13205		K14308	34.7217	29.5367	0.233329	0.0749667	0.0749667
mix_12627_1	11.495	6.52361	10.3033	10.0063	K12261		K01880	134.828	73.0367	0.884431	0.919211	0.919211
mix_12629_1	2.91167	2.45682	2.83167	2.80448	K12261		K00819	189.037	89.65	1.07629	1.49974	1.49974
mix_1262_1	1.69833	3.79759	2.26167	2.70878	K01490		K11374	52.3617	33.565	0.641553	0.275633	0.275633
mix_12632_1	3.91333	4.40985	6.45667	7.0402	K12261		K09498	106.17	54.43	0.963902	0.774013	0.774013
mix_1263_1	0	0	3.16667	5.15725	K12585		K01495	115.173	87.6333	0.394255	0.399788	0.399788
mix_12645_1	0	0	0	0	K15430		K08286	835.38	615.738	0.440115	3.1933	3.1933
mix_12646_2	23.4367	11.9071	17.22	14.2974	K15430		K00859	41.4267	16.9233	1.29155	0.376809	0.376809
mix_12647_1	18.2667	14.3971	17.9783	17.1478	K15430		K15543	46.995	29.2567	0.683742	0.260682	0.260682
mix_12651_2	9.43667	5.61993	6.53333	5.6352	K15204		K02212	53.3883	17.9683	1.57107	0.560531	0.560531
mix_12652_2	2.96667	2.69731	3.17	2.6307	K15204		K15447	69.235	31.1083	1.1542	0.579082	0.579082
mix_12654_1	215.815	80.1736	247.867	230.496	K20522		K14575	58.2567	40.9567	0.508325	0.252163	0.252163
mix_12654_2	5.74167	7.23371	7.20167	7.24323	K18158		K17664	20.5167	15.985	0.360078	0.0657172	0.0657172
mix_12656_1	11.8517	10.9017	17.3883	17.4114	K18158		K12812	226.81	91.7167	1.30623	2.08034	2.08034
mix_12658_2	47.4283	28.2008	34.64	32.6956	K14864		K06662	66.3667	52.42	0.340341	0.20214	0.20214
mix_12659_2	49.3717	26.1103	36.2417	33.2789	K14864		K15100	244.937	153.765	0.671682	1.339	1.339
mix_1265_1	6.05833	3.38878	0	0	K13348		K10848	39.2567	29.655	0.404662	0.13943	0.13943
mix_1265_2	0.571667	0.935422	0	0	K04799		K04555	87.1783	57.9933	0.588083	0.426865	0.426865
mix_12660_1	4.69167	5.09787	2.37333	2.73805	K14864		K05293	48.7033	21.12	1.20541	0.420829	0.420829
mix_1267_1	14.555	10.156	0.241667	0.289218	K14310		K01480	131.593	71.3817	0.882461	0.895588	0.895588
mix_1268_1	20.2833	15.4958	0.478333	0.556519	K14554		K03124	111.195	68.705	0.694605	0.624797	0.624797
mix_12690_2	4.445	3.71113	3.11833	3.07662	K11599		K01054	82.225	36.875	1.15693	0.688954	0.688954
mix_12693_1	79.0733	41.2095	59.405	47.019	K11599		K05767	44.51	13.035	1.77174	0.509774	0.509774
mix_12694_1	25.2833	15.737	22.2967	23.2385	K14963		K14771	108.498	47.1033	1.20377	0.936545	0.936545
mix_12695_1	6.94167	6.85296	10.3783	11.0218	K14963		K05824	187.97	90.16	1.05994	1.47401	1.47401
mix_1269_1	7.46667	6.13102	0.141667	0.160043	K00749		K15264	29.3033	23.7	0.306178	0.0811422	0.0811422
mix_12700_1	289.022	163.878	186.695	160.65	K03259		K03258	223.173	92.1467	1.27616	2.012	2.012
mix_1271_1	13.5383	9.83761	0.453333	0.565086	K11236		K08738	2363.36	2625.31	-0.15165	3.78267	3.78267
mix_12722_1	53.6633	23.7944	42.415	36.7894	K17804		K09880	124.713	119.205	0.065171	0.079482	0.079482
mix_12724_1	36.16	13.0433	26.5433	20.5429	K17804		K10839	126.122	74.205	0.765228	0.766478	0.766478
mix_12730_1	12.525	6.76118	9.15667	6.89508	K12844		K11446	70.7317	19.735	1.8416	0.833017	0.833017
mix_12732_1	12.0633	6.70644	9.35	8.30728	K12844		K03844	39.6483	20.6433	0.941584	0.283848	0.283848
mix_12734_1	299.185	181.979	418.818	465.035	K17741		K08488	50.85	28.305	0.845191	0.334505	0.334505
mix_12735_1	58.2267	26.8199	58.0067	55.32	K17741		K03107	84.91	46.6267	0.864779	0.568751	0.568751
mix_12744_1	45.49	23.614	23.575	21.5597	K03004		K13953	761.02	1074.82	-0.498093	4.57211	4.57211
mix_12747_1	16.3067	8.82287	13.2183	11.1054	K03004		K01210	1059.26	550.213	0.944989	7.60466	7.60466
mix_12748_1	10.6067	7.93343	3.54833	3.29661	K06685		K03035	169.148	72.4383	1.22346	1.47786	1.47786
mix_12750_1	7.04	3.72925	3.125	3.05574	K06685		K17878	57.625	31.325	0.87938	0.391104	0.391104
mix_12752_1	3.33333	2.25234	1.18333	1.22793	K11243		K01183	188.833	72.0917	1.38921	1.8124	1.8124
mix_12755_1	1.52	1.48082	1.03833	0.96025	K11243		K06173	104.007	37.3417	1.47782	1.04444	1.04444
mix_12756_1	910.82	489.25	617.773	586.015	K02265		K03217	76.9333	41.2383	0.899623	0.53155	0.53155
mix_12771_1	15.5867	8.41491	10.2283	9.12012	K06675		K07232	11.0017	9.46167	0.217556	0.0222596	0.0222596
mix_12780_1	11.23	6.18523	5.37667	4.71046	K00750		K02331	194.373	99.625	0.964251	1.41744	1.41744
mix_12781_1	1863.3	974.147	1120.18	945.991	K02971		K01268	32.7583	21.1217	0.633138	0.170567	0.170567
mix_12782_1	26.1667	18.7328	0.2	0.447214	K03115		K14684	82.525	48.7583	0.759182	0.49834	0.49834
mix_12782_2	1.26333	1.74874	0	0	K20476		K03458	178.188	94.6767	0.912322	1.2447	1.2447
mix_12783_1	0	0	0	0	K02971		K03250	102.497	2.73833	5.22614	2.74986	2.74986
mix_12784_1	6.75833	15.1121	23.5433	44.1884	K02971		K12823	928.61	502.408	0.886212	6.34093	6.34093
mix_12787_2	9.86167	5.39724	6.105	5.08932	K00750		K07937	799.38	414.072	0.949001	5.75783	5.75783
mix_12790_1	18.8533	10.0915	17.25	16.2116	K18802		K15115	84.0767	46.1867	0.864229	0.562887	0.562887
mix_12792_1	15.7667	8.18811	15.5567	14.2636	K18802		K02872	2245.83	912.765	1.29893	20.514	20.514
mix_12793_1	17.3583	10.632	15.7883	14.2494	K04371		K01067	432.39	350.253	0.303934	1.18936	1.18936
mix_12798_1	0	0	23.9683	34.8921	K02976		K00600	895.048	472.297	0.922272	6.30532	6.30532
mix_12799_1	13.17	16.6999	84.6267	141.563	K02976		K07976	9.73	6.58	0.564352	0.0460229	0.0460229
mix_1279_1	3.85	3.19546	0	0	K08257		K00611	191.892	137.978	0.47585	0.784844	0.784844
mix_127_1	0.326667	0.730449	3.53	5.95713	K12619		K02925	1487.06	634.71	1.22829	13.0308	13.0308
mix_12800_1	2106.1	1212.66	1191.4	998.148	K02976		K11273	49.8317	28.18	0.822391	0.320781	0.320781
mix_12801_1	0.843333	1.88575	63.38	82.7142	K02976		K11379	18.615	13.29	0.486125	0.077549	0.077549
mix_12802_1	11.5267	15.866	0.768333	1.71805	K02976		K11971	33.1517	13.3233	1.31513	0.305602	0.305602
mix_12803_1	11.085	14.6655	33.6983	49.0159	K02976		K02147	218.945	126.063	0.79642	1.37386	1.37386
mix_12804_1	4.05	3.32411	4.13	3.55486	K10901		K14399	41.9533	22.2483	0.915088	0.293751	0.293751
mix_12805_1	3.375	2.24872	1.73333	1.65541	K10901		K09496	151.647	84.5867	0.842212	0.994792	0.994792
mix_12812_1	15.5267	10.2295	8.97167	7.24597	K14831		K08744	28.1267	24.2733	0.212566	0.0556924	0.0556924
mix_12813_1	29.555	16.6804	4.425	8.23217	K02220		K11371	83.6517	60.48	0.467936	0.337222	0.337222
mix_12814_1	17.0583	11.2256	3.57667	4.02837	K02220		K06125	19.3017	8.61667	1.16352	0.162418	0.162418
mix_12815_2	66.3883	47.5436	49.3017	42.155	K19718		K01597	103.45	36.26	1.51248	1.05654	1.05654
mix_12816_2	41.485	31.4659	20.4017	17.6457	K19718		K03262	177.113	89.7633	0.980475	1.30833	1.30833
mix_12819_1	17.1133	11.6753	12.49	10.1195	K17665		K02128	5909.39	161.132	5.1967	157.733	30
mix_1281_1	9.525	7.41476	0.158333	0.224382	K11429		K11873	91.075	60.715	0.585002	0.443987	0.443987
mix_1281_2	15.185	9.82053	0.336667	0.49277	K03327		K15216	126.692	49.8317	1.34619	1.18817	1.18817
mix_12822_1	11.7467	8.625	11.6833	11.8713	K17665		K10756	55.395	32.3583	0.775618	0.340316	0.340316
mix_12830_1	1373.39	909.68	779.655	764.48	K02912		K17662	96.1417	47.8383	1.00699	0.724935	0.724935
mix_12839_1	0.545	0.535623	4.18167	6.22292	K09503		K14154	41.0917	23.495	0.806492	0.260443	0.260443
mix_12840_1	18.2583	10.7735	12.7317	10.6628	K14557		K13346	13.81	6.90833	0.999304	0.10352	0.10352
mix_12841_1	21.4233	15.6304	14.895	12.6188	K14557		K14753	1648.63	613.478	1.42619	16.131	16.131
mix_1284_1	0	0	0	0	K07342		K01410	33.6767	24.535	0.456908	0.132987	0.132987
mix_12851_1	275.375	204.322	176.262	193.713	K02134		K11772	29.1067	17.4067	0.74171	0.172497	0.172497
mix_12852_2	11.025	7.23591	6.44	6.06057	K06670		K07565	315.895	213.81	0.563116	1.49143	1.49143
mix_12853_1	28.055	19.857	17.1633	18.986	K06670		K03108	96.8183	48.2683	1.0042	0.728483	0.728483
mix_1285_1	23.5183	20.341	0	0	K07342		K07243	66.51	48.3217	0.460901	0.26463	0.26463
mix_12863_1	476.935	296.155	341.452	354.275	K00411		K05355	32.9983	19.0483	0.792728	0.206294	0.206294
mix_12867_1	74.085	38.7806	47.715	39.5333	K12492		K07542	38.7033	26.125	0.567027	0.183797	0.183797
mix_12869_1	17.7667	10.9593	10.615	9.62625	K13886		K15165	18.85	12.42	0.601899	0.094107	0.094107
mix_12870_1	39.485	30.2002	22.185	22.3325	K13886		K12816	23.905	14.2067	0.750744	0.143061	0.143061
mix_12871_1	35.5733	23.6318	19.3667	18.2357	K13886		K03065	97.5983	42.7467	1.19104	0.835786	0.835786
mix_12873_1	4.04667	4.75359	2.30333	5.15041	K13886		K05755	159.997	135.592	0.238773	0.352893	0.352893
mix_12875_1	94.4667	78.4503	106.25	114.627	K16066		K14012	57.9967	33.7867	0.779516	0.357733	0.357733
mix_12877_1	47.165	35.9661	47.1133	57.1933	K16066		K04794	18.1933	9.9	0.877909	0.123317	0.123317
mix_12878_1	46.9283	28.2287	37.5117	36.1575	K03800		K01657	122.543	72.3717	0.759795	0.740477	0.740477
mix_12879_1	9.52333	5.91215	8.95167	8.7405	K03800		K10755	64.5917	37.03	0.802653	0.407835	0.407835
mix_1287_1	0	0	0	0	K06671		K06276	117.5	73.915	0.668722	0.640017	0.640017
mix_12880_1	10.2167	6.67447	11.4667	9.05281	K03800		K07300	143.137	88.9167	0.686868	0.796949	0.796949
mix_12881_1	0.278333	0.431216	0.405	0.447689	K12776		K11774	35.8333	34.3983	0.0589636	0.0207056	0.0207056
mix_12881_2	0	0	0	0	K12776		K10703	65.0583	41.44	0.65071	0.346498	0.346498
mix_12882_1	0	0	0	0	K12776		K14635	54.62	17.1783	1.66884	0.599099	0.599099
mix_12882_2	0	0	0	0	K12776		K14307	61.315	28.8433	1.088	0.490462	0.490462
mix_12883_3	10.945	5.78613	8.81667	7.23976	K12872		K19703	615.318	299.097	1.04072	4.75826	4.75826
mix_12884_1	16.6683	7.78529	8.60333	10.1803	K12872		K11108	58.4217	42.605	0.455481	0.230079	0.230079
mix_12887_1	14.0483	10.801	14.935	25.6336	K05528		K17922	31.785	19.0683	0.737167	0.187437	0.187437
mix_12888_1	29.7417	15.9244	19.9617	20.376	K05528		K01412	74.0233	47.2233	0.64848	0.39313	0.39313
mix_12889_1	36.7483	23.4128	26.0617	25.8397	K05528		K02953	2074.96	1019.79	1.02482	15.8578	15.8578
mix_1288_1	0.465	0.719346	0	0	K06671		K03123	32.1383	20.815	0.626672	0.165922	0.165922
mix_12892_1	67.09	45.3638	68.72	68.0173	K13289		K15132	22.82	7.63333	1.57991	0.240568	0.240568
mix_12893_2	95.76	76.4457	93.4033	105.179	K13289		K02901	1991.74	828.757	1.26501	17.8397	17.8397
mix_12895_1	16.4633	14.9158	14.6333	15.8022	K20498		K15304	49.2567	13.8517	1.83026	0.577523	0.577523
mix_12897_1	18.37	16.2665	13.8083	15.8261	K20498		K17969	43.8817	23.435	0.904954	0.304592	0.304592
mix_128_1	0.918333	1.69814	1.78833	3.11677	K15172		K20474	23.2683	7.99833	1.5406	0.240847	0.240847
mix_12901_1	179.647	87.8768	169.692	150.358	K07119		K14311	87.96	41.4167	1.08664	0.702927	0.702927
mix_12901_2	20.8083	12.7285	18.98	18.6737	K11776		K03858	39.475	37.4017	0.0778367	0.0299191	0.0299191
mix_12902_1	11.9933	5.4423	8.905	8.18753	K11776		K19307	37.3717	27.7883	0.427466	0.139268	0.139268
mix_1290_1	32.03	24.1742	0.758333	0.679642	K14297		K18624	35.8967	19.5	0.880376	0.243849	0.243849
mix_12920_2	77.4917	40.7028	65.2867	61.3262	K17439		K00222	28.615	13.72	1.06049	0.224479	0.224479
mix_12923_1	49.7367	27.0996	31.2533	29.3747	K17439		K14522	40.2067	27.995	0.522266	0.178097	0.178097
mix_12935_1	4.79167	10.7145	0.926667	2.07209	K03882		K18749	64.595	41.2217	0.64802	0.342856	0.342856
mix_12936_2	3.70667	5.45619	3.53667	4.56268	K03883		K17972	59.4533	35.525	0.742923	0.352808	0.352808
mix_12940_1	3.87667	3.46171	1.32833	1.32257	K03883		K13519	86.71	50.1917	0.788751	0.539906	0.539906
mix_12940_2	0	0	0	0	K03882		K15146	46.6117	44.015	0.0826958	0.0374722	0.0374722
mix_12941_2	13.72	6.27025	8.42167	5.8483	K03883		K00627	178.478	84.9267	1.07146	1.41114	1.41114
mix_12946_1	24.115	13.6163	27.5917	28.0071	K17775		K05605	74.16	45.4167	0.707419	0.422954	0.422954
mix_12948_1	16.5367	8.46185	17.5667	16.9959	K17775		K17656	121.493	84.135	0.530099	0.545017	0.545017
mix_12949_1	1175.06	745.759	595.528	550.583	K02984		K02218	155.912	80.3483	0.956389	1.12978	1.12978
mix_1294_1	0	0	0	0	K11761		K09384	54.635	47.68	0.196441	0.100494	0.100494
mix_12950_1	0	0	15.2833	20.9883	K02984		K00942	231.665	115.76	1.0009	1.73869	1.73869
mix_12951_1	0.0783333	0.175159	18.455	27.4457	K02984		K14819	53.525	30.0217	0.834209	0.348477	0.348477
mix_12953_1	87.1867	35.2467	64.685	57.6486	K16368		K11245	178.483	138.118	0.369885	0.58553	0.58553
mix_12954_1	90.0367	48.5852	70.2	62.1276	K16368		K00958	745.223	351.573	1.08385	5.9438	5.9438
mix_12957_1	5.25167	3.25703	3.79333	3.06312	K05954		K14845	25.5167	10.995	1.21459	0.221734	0.221734
mix_12958_1	4.64167	2.18682	2.28	2.62424	K05954		K20131	34.3533	22.0583	0.639126	0.180271	0.180271
mix_12959_1	2.58833	5.78769	0	0	K14573		K00766	56.5067	32.8783	0.781284	0.349175	0.349175
mix_1295_1	18.8233	15.7313	0.618333	0.86611	K13721		K03320	238.777	92.975	1.36075	2.25715	2.25715
mix_12962_1	22.8267	15.1695	12.5483	9.89289	K14573		K02210	29.92	15.9167	0.910572	0.208688	0.208688
mix_12963_1	16.66	8.67373	11.7317	10.0412	K14573		K12777	8.45333	8.35167	0.0174562	0.00146676	0.00146676
mix_12964_1	129.025	69.4661	85.7017	77.0484	K15109		K02979	612.827	33.9033	4.17598	13.5037	13.5037
mix_12967_1	8.61667	5.97168	7.48667	7.28679	K13345		K10259	59.5933	28.26	1.07639	0.472822	0.472822
mix_12968_1	5.46667	3.44057	6.53667	6.63367	K13345		K17583	34.515	17.0417	1.01816	0.262464	0.262464
mix_12970_1	7.33333	3.27334	6.63	5.94157	K11574		K18722	109.14	63.3333	0.785143	0.677081	0.677081
mix_12971_1	3.67667	3.43473	7.53333	9.36575	K11574		K19992	35.105	27.4117	0.356886	0.111557	0.111557
mix_12972_1	44.3267	35.5593	55.5967	63.2783	K01792		K02981	1951.28	753.317	1.37309	18.5683	18.5683
mix_12973_1	52.7567	31.4984	44.6167	46.8974	K01792		K11684	145.055	61.7067	1.2331	1.27479	1.27479
mix_12979_1	71.735	48.2038	49.1283	42.2608	K00809		K17715	32.67	27.92	0.226668	0.0686689	0.0686689
mix_12980_1	81.885	56.8426	65.5633	58.3277	K00809		K17677	23.895	12.295	0.958637	0.173465	0.173465
mix_12981_1	175.282	100.106	101.328	92.5245	K00765		K16944	79.5833	34.875	1.19027	0.681183	0.681183
mix_12986_3	22.1633	17.1148	0.153333	0.159757	K08176		K01466	37.9533	26.8617	0.498678	0.161609	0.161609
mix_12987_2	72.235	51.5928	1.725	2.32832	K08176		K12572	54.4667	33.235	0.71267	0.312512	0.312512
mix_12997_2	0.451667	0.546425	0.421667	0.632467	K10736		K15356	382.728	182.342	1.06968	3.02221	3.02221
mix_12998_2	1.32833	1.00077	1.29333	1.73305	K10736		K01312	42.3233	29.2283	0.534086	0.191074	0.191074
mix_13003_1	30.65	16.2856	24.6467	23.8571	K04630		K11269	53.6317	30.9517	0.793068	0.335402	0.335402
mix_13003_2	0	0	0	0	K04630		K12770	5.77167	4.24833	0.442091	0.0221488	0.0221488
mix_13004_1	37.33	19.3998	38.8833	39.303	K04630		K00344	63.2867	39.6883	0.673187	0.346607	0.346607
mix_13006_1	27.6	13.4699	19.5617	21.9257	K16219		K04079	1272.49	1131.98	0.168808	2.02947	2.02947
mix_13009_1	4.35	6.47341	2.47333	3.61775	K17787		K01937	261.213	131.75	0.987426	1.94011	1.94011
mix_13016_1	3.80167	4.9387	26.8267	44.7391	K02975		K00618	41.63	22.1183	0.912381	0.290814	0.290814
mix_13017_1	17.2917	20.4593	3.515	5.221	K02975		K10733	68.57	47.5867	0.52702	0.306085	0.306085
mix_13018_1	555.1	266.894	283.412	222.972	K02975		K11768	59.05	21.635	1.44857	0.584389	0.584389
mix_1301_1	1.57333	2.2921	0.145	0.32423	K12580		K16186	45.22	25.195	0.843824	0.297089	0.297089
mix_13024_1	14.0433	7.10517	10.4783	12.5791	K12399		K14347	15.3483	14.1083	0.121534	0.0179	0.0179
mix_13025_1	515.45	362.177	340.468	374.932	K02137		K03350	43.4833	23.7133	0.874764	0.293906	0.293906
mix_13027_1	234.207	154.623	139.635	143.133	K02137		K06947	61.9983	33.9717	0.867897	0.416461	0.416461
mix_13028_1	521.432	294.85	396.74	387.281	K04713		K06133	22.445	14.7233	0.60829	0.113046	0.113046
mix_13032_1	6.33333	4.12	5.165	5.3224	K00916		K11366	39.8733	25.3167	0.655337	0.213607	0.213607
mix_13033_1	16.8433	7.44263	12.9917	10.1194	K00916		K01736	206.688	104.477	0.984276	1.53136	1.53136
mix_13046_1	10.0017	6.83762	8.77	8.60844	K14292		K07766	50.9983	17.15	1.57224	0.535728	0.535728
mix_13053_1	6.355	4.78229	4.39333	4.00493	K12837		K11099	44.7433	39.02	0.197459	0.0826991	0.0826991
mix_13054_1	10.825	5.80002	8.70833	7.39859	K12837		K03686	102.847	91.11	0.174814	0.169531	0.169531
mix_13055_1	9.38667	6.60704	9.01333	8.51513	K02179		K00621	89.9717	63.175	0.510117	0.390614	0.390614
mix_13055_2	0	0	0	0	K12837		K10685	36.98	21.3217	0.794425	0.231582	0.231582
mix_13057_1	5.03833	3.93413	4.94167	5.26831	K02179		K01656	61.8083	43.1483	0.518497	0.272098	0.272098
mix_13066_1	42.7783	27.4187	34.5783	34.0191	K00026		K03064	125.128	70.33	0.831196	0.812321	0.812321
mix_13067_1	41.3683	23.421	30.7917	35.147	K00026		K10863	23.2683	7.38833	1.65505	0.253691	0.253691
mix_13068_1	20.7317	11.8824	21.2517	18.8352	K11672		K07466	68.975	43.255	0.673207	0.37777	0.37777
mix_13079_1	2.20833	2.06722	0.3	0.378418	K03881		K16948	95.6967	41.2283	1.21483	0.831705	0.831705
mix_1307_1	0	0	4.03333	4.90222	K08150		K02321	41.7683	20.9667	0.994312	0.311891	0.311891
mix_13081_1	0	0	0.548333	0.875793	K03881		K11377	70.715	61.0133	0.212892	0.140219	0.140219
mix_13083_1	12.16	5.80871	8.75833	7.07543	K03881		K14675	41.5867	19.8867	1.06432	0.327136	0.327136
mix_13088_1	169.82	119.547	154.042	168.798	K01939		K19849	140.052	62.695	1.15954	1.17546	1.17546
mix_13088_2	39.535	25.0833	22.7933	19.8045	K03846		K10956	361.003	152.143	1.24658	3.19839	3.19839
mix_13094_1	8.85167	3.90192	6.93167	6.59288	K08489		K03781	403.24	391.433	0.0428721	0.170347	0.170347
mix_13095_1	7.96333	6.19996	4.85167	4.27419	K08489		K01807	66.2483	32.0067	1.04951	0.515599	0.515599
mix_13099_1	4.68833	3.56156	2.845	2.13503	K03883		K07941	25.5833	5.99	2.09458	0.330664	0.330664
mix_1309_2	11.5867	7.85771	0.33	0.652559	K14557		K02998	1772.34	696.065	1.34836	16.6415	16.6415
mix_13104_2	18.575	12.437	19.0517	20.0408	K01923		K02941	1863.85	887.418	1.0706	14.7275	14.7275
mix_13106_1	44.265	31.4984	42.8133	46.0586	K01923		K02132	1239.13	654.307	0.921294	8.72209	8.72209
mix_13106_2	0	0	0	0	K08857		K09485	815.847	756.593	0.10878	0.85525	0.85525
mix_1310_1	0	0	3.7	8.27345	K01679		K00981	112.865	78.8167	0.518026	0.49648	0.49648
mix_13110_1	74.7817	52.9504	37.5833	34.844	K14847		K00211	36.2217	21.065	0.782005	0.223992	0.223992
mix_13112_1	22.285	11.4317	15.975	13.6811	K02835		K02988	114.032	80.8433	0.496234	0.483518	0.483518
mix_13116_1	32.515	72.7058	0	0	K02835		K01520	65.13	41.735	0.642064	0.343071	0.343071
mix_13117_1	8.63167	6.53605	6.01333	6.80301	K05286		K14328	13.7617	9.11167	0.594868	0.0680331	0.0680331
mix_13118_1	2.445	2.24137	2.01833	2.85943	K05286		K12601	22.2917	11.835	0.913445	0.155864	0.155864
mix_1311_1	0	0	2.28	2.81042	K00728		K07179	57.7617	36.6233	0.657349	0.31022	0.31022
mix_13121_1	3.31333	2.29079	3.14333	3.53331	K17798		K11493	52.005	21.6333	1.26539	0.465908	0.465908
mix_13123_1	3.935	2.39537	2.51833	2.18997	K17798		K01655	432.73	266.483	0.699422	2.44523	2.44523
mix_13123_2	5.48667	4.9168	2.82	3.30358	K05286		K06646	77.5267	89.0717	-0.200274	0.166827	0.166827
mix_13131_1	6.985	2.7096	8.12167	6.58613	K12198		K01755	70.36	38.0383	0.887301	0.48091	0.48091
mix_13133_1	10.915	4.75972	8.92	8.42977	K12198		K17943	23.5967	0.886667	4.73405	0.579526	0.579526
mix_13134_1	7.165	4.60335	5.06833	5.92485	K00591		K15027	30.3883	22.3783	0.441415	0.11646	0.11646
mix_13135_1	4.41333	4.00788	3.80333	3.42723	K00591		K00963	306.265	137.603	1.15427	2.56171	2.56171
mix_13138_1	4.34833	2.86446	4.01333	3.12282	K12200		K09548	19.0117	17.9133	0.0858512	0.0158503	0.0158503
mix_13139_1	9.265	5.46624	8.72833	7.60405	K12200		K07556	80.57	35.955	1.16405	0.678205	0.678205
mix_13140_1	11.185	4.69056	11.2567	10.4345	K03011		K15221	7.17333	3.55833	1.01144	0.0542723	0.0542723
mix_13142_1	16.0117	7.40794	12.0633	10.2307	K03011		K18044	23.0483	22.8617	0.0117318	0.00269305	0.00269305
mix_13144_2	17.545	12.0308	14.2383	13.3434	K01814		K00817	89.5633	72.5083	0.304761	0.246966	0.246966
mix_13145_1	2.33667	2.37147	0.893333	1.53825	K01814		K11187	222.583	100.125	1.15254	1.85968	1.85968
mix_13146_2	7.28	3.08404	6.11333	5.32325	K01814		K10877	17.9433	7.45833	1.26652	0.160859	0.160859
mix_13166_2	56.415	27.1904	72.9883	78.7465	K09074		K15918	21.0667	25.02	-0.24812	0.0571751	0.0571751
mix_13168_1	0.79	0.93984	6.64333	10.2184	K14813		K12627	22.1233	10.5317	1.07084	0.174841	0.174841
mix_13199_1	299.08	146.481	186.998	154.396	K03246		K08964	21.0283	24.7117	-0.232858	0.0532546	0.0532546
mix_13202_1	1.255	2.48599	6.165	11.0204	K10246		K15082	36.785	23.815	0.627247	0.190056	0.190056
mix_13205_1	27.2183	13.9022	21.4067	21.3328	K14209		K06176	67.225	26.9417	1.31916	0.621104	0.621104
mix_13206_1	36.615	26.8076	31.0633	30.1288	K14209		K18670	72.1283	55.0267	0.390435	0.248229	0.248229
mix_13207_1	10.1267	7.19936	6.01	5.07487	K01464		K00459	34.605	25.3867	0.44691	0.134054	0.134054
mix_13209_1	4.53667	2.81598	2.74667	2.18516	K12829		K03039	117.213	82.0133	0.515206	0.513214	0.513214
mix_13210_1	3.44333	1.91715	3.845	3.37945	K12829		K09510	198.027	282.763	-0.5139	1.23539	1.23539
mix_13210_2	1.885	2.67504	0.461667	1.03232	K01464		K11135	13.38	6.98667	0.937402	0.0954588	0.0954588
mix_13211_1	17.67	8.01727	14.2133	11.4178	K01464		K20363	81.62	49.025	0.735405	0.480385	0.480385
mix_13213_1	1.58833	2.26584	0	0	K01464		K02328	26.49	10.1033	1.39062	0.254436	0.254436
mix_13219_1	15.1617	11.4774	10.7833	9.9152	K10754		K06127	111.975	72.5867	0.6254	0.577125	0.577125
mix_13220_1	13.28	9.50451	8.14333	8.54817	K10754		K03141	45.39	17.1517	1.40403	0.439051	0.439051
mix_13223_1	7.42333	4.83502	4.605	4.4053	K15145		K06013	267.765	154.37	0.794575	1.67709	1.67709
mix_13224_1	6.39667	4.5974	5.03	4.71867	K15145		K20360	67.7067	39.4383	0.779699	0.417704	0.417704
mix_13225_1	6.18833	5.71947	2.12333	3.20402	K00354		K14568	208.972	129.793	0.687091	1.16381	1.16381
mix_13228_1	8.04	9.33482	9.73833	9.4147	K19708		K08054	98.15	21.57	2.18596	1.30852	1.30852
mix_13230_1	46.3717	15.8961	31.2767	28.2362	K02950		K12832	0.87	1.15	-0.402547	0.00406572	0.00406572
mix_13231_1	170.182	93.5879	172.17	163.852	K02950		K03256	33.1983	14.2483	1.22032	0.2895	0.2895
mix_13233_1	20.375	15.0793	14.9633	15.4924	K06126		K06673	8.86	4.78667	0.888285	0.0606107	0.0606107
mix_13234_2	14.7383	10.0726	14.82	13.7593	K06126		K03854	162.39	112.653	0.527573	0.725527	0.725527
mix_13236_1	9.77167	21.1426	1.00667	1.52358	K09872		K01834	2077.34	986.302	1.07464	16.4616	16.4616
mix_13237_1	5.03	2.41709	2.60833	3.38197	K20524		K18469	5.005	6.13333	-0.293301	0.0163344	0.0163344
mix_13237_2	12.8117	7.57135	9.15167	8.11775	K07305		K20182	45.5083	15.345	1.56836	0.4772	0.4772
mix_13238_1	2.985	2.23914	2.98833	2.56082	K20524		K02269	98.6367	52.4967	0.909898	0.68758	0.68758
mix_13239_1	21.5017	12.6904	13.7567	10.1737	K03145		K02178	32.3667	17.5967	0.879207	0.21964	0.21964
mix_13242_1	6.33	6.09192	9.03	11.4132	K11134		K05531	84.615	40.985	1.04582	0.656773	0.656773
mix_13243_1	3.85833	2.65754	2.185	1.87891	K11134		K00863	299.265	276.285	0.115266	0.331708	0.331708
mix_13244_1	12.545	9.0654	14.6417	16.3717	K11134		K11275	16.3483	17.6833	-0.113247	0.0192699	0.0192699
mix_13245_1	6.37667	3.95531	5.055	5.71479	K11134		K00831	160.058	46.8683	1.77191	1.83328	1.83328
mix_13248_1	1.48167	1.08096	0.45	0.636396	K11134		K10735	14.4083	4.31667	1.73891	0.162806	0.162806
mix_13251_1	531.038	232.383	608.545	736.093	K04078		K18737	31.1767	20.2667	0.621358	0.159824	0.159824
mix_13251_2	0	0	0	0	K12843		K01876	341.613	177.367	0.945629	2.45381	2.45381
mix_13252_2	0.121667	0.272055	0.181667	0.293281	K12843		K03267	138.218	60.9867	1.18038	1.17569	1.17569
mix_13256_1	9.25333	4.25694	7.95	6.57378	K19708		K10251	149.475	76.4883	0.966593	1.09207	1.09207
mix_13257_1	13.545	11.1191	11.0133	9.85812	K19708		K04563	147.877	85.6083	0.788571	0.920598	0.920598
mix_13278_1	17.4317	12.3877	14.5083	12.2812	K12346		K03353	30.6867	18.0467	0.76588	0.186619	0.186619
mix_13279_1	18.5817	9.7455	18.1567	16.1252	K12346		K13800	50.3367	28.6917	0.810978	0.320451	0.320451
mix_1329_1	12.6983	9.37437	0.223333	0.378535	K11836		K00414	511.828	325.137	0.654614	2.73944	2.73944
mix_132_1	23.7767	16.2502	0.428333	0.667343	K09494		K10256	777.837	528.452	0.557696	3.64256	3.64256
mix_13301_1	7.45	5.30524	7.74	7.7557	K00868		K01881	254.258	116.098	1.13095	2.09427	2.09427
mix_13303_1	9.34	5.68374	8.51	7.9819	K00868		K15323	49.7717	33.2733	0.580958	0.241228	0.241228
mix_13306_1	50.64	34.2843	27.535	26.5961	K19877		K00972	48.2533	24.2517	0.992545	0.359822	0.359822
mix_13307_1	31.8367	21.0367	18.5233	15.2599	K19877		K18721	39.6867	26.5867	0.577951	0.191514	0.191514
mix_13311_1	17.3917	12.3176	20.0367	21.1537	K07393		K17260	40.53	16.815	1.26924	0.363923	0.363923
mix_13316_1	26.3333	14.3943	32.9117	35.6564	K07393		K14524	20.0533	15.065	0.412641	0.0724564	0.0724564
mix_13321_1	15.5283	11.5143	6.78167	7.0538	K14528		K19475	59.7517	54.9483	0.120903	0.069338	0.069338
mix_13322_1	2.74333	2.14716	3.92333	3.87197	K10772		K17783	61.89	51.78	0.257311	0.146243	0.146243
mix_13325_1	17.16	14.3059	20.0733	24.6629	K14528		K02999	218.853	124.932	0.808825	1.39031	1.39031
mix_13325_2	3.04667	2.22476	3.36	4.12936	K10772		K03038	85.7367	22.3783	1.93781	1.04753	1.04753
mix_13328_1	40.8583	21.8379	23.72	20.409	K15113		K00854	55.34	28.5733	0.953653	0.400121	0.400121
mix_13329_1	31.4317	16.5793	26.97	24.2279	K15113		K11096	75.415	22.2067	1.76386	0.860954	0.860954
mix_1332_1	55.5217	52.4574	1.215	1.7394	K00164		K14679	37.2117	19.3817	0.941062	0.266289	0.266289
mix_13332_1	5.825	4.26628	4.12667	4.07591	K16569		K05283	78.6617	37.495	1.06896	0.620836	0.620836
mix_13337_1	7.76833	12.9529	2.12333	3.13171	K16569		K03657	40.9217	22.1017	0.88871	0.280047	0.280047
mix_13340_1	54.6533	25.4339	42.4783	34.2664	K02876		K03507	43.9433	21.9083	1.00416	0.33063	0.33063
mix_13342_2	59.9817	48.4954	40.505	44.9381	K12667		K01663	73.18	40.7933	0.843116	0.480464	0.480464
mix_13344_3	28.1983	20.6248	15.4767	17.3347	K12667		K12591	60.8333	49.9683	0.283848	0.157254	0.157254
mix_13345_2	19.7267	14.7116	18.5733	18.3231	K09647		K03849	55.5367	34.8617	0.671799	0.303648	0.303648
mix_13348_1	0.778333	1.21354	2.95	3.12684	K08293		K00297	125.732	80.8533	0.636969	0.657941	0.657941
mix_13349_4	6.41167	5.15507	10.2617	8.4817	K08293		K15364	9.1	6.71	0.439554	0.0347467	0.0347467
mix_1334_1	31.7667	25.9115	0.701667	0.878985	K01293		K20303	15.7633	11.1533	0.499098	0.0671702	0.0671702
mix_13352_3	1.775	2.01916	3.21833	2.70001	K08293		K11650	24.365	0.32	6.25059	0.77148	0.77148
mix_13356_1	467.648	307.172	267.443	246.378	K01251		K01934	18.7933	14.3617	0.387998	0.0643203	0.0643203
mix_13360_1	18.98	12.5251	12.7083	11.5901	K08288		K11762	21.395	14.9883	0.513434	0.0934021	0.0934021
mix_13361_1	10.1867	5.2363	7.26833	5.92627	K11761		K12766	37.9283	62.85	-0.728637	0.367154	0.367154
mix_13362_1	20.5367	12.0369	13.0583	11.767	K11761		K14853	33.3567	16.2883	1.03414	0.256698	0.256698
mix_13364_1	13.78	7.00915	11.3767	10.4453	K10089		K01488	184.588	90.2283	1.03266	1.41896	1.41896
mix_13365_1	12.21	7.16197	11.8483	9.54226	K10089		K02256	9606.41	5893.28	0.704928	54.6308	30
mix_13367_1	52.3567	31.71	51.5617	43.8525	K03426		K14708	387.82	278.382	0.478323	1.5933	1.5933
mix_13369_1	54.665	31.1433	50.7133	39.5597	K03426		K00006	398.29	450	-0.176106	0.746944	0.746944
mix_13375_1	12.9533	8.06705	10.3783	9.67944	K20457		K14402	51.3233	25.185	1.02705	0.392889	0.392889
mix_13377_1	16.8133	8.64789	14.455	15.465	K20457		K15084	68.975	52.4467	0.395222	0.239943	0.239943
mix_13379_1	12.0133	8.95229	9.655	9.56953	K00949		K00791	42.08	22.9933	0.871919	0.283693	0.283693
mix_1337_1	25.75	14.7562	0.366667	0.533875	K01784		K07401	8.25333	6.93167	0.251775	0.019116	0.019116
mix_13381_2	9.68	7.13342	8.28	8.50054	K00949		K08496	63.9333	34.465	0.891436	0.438579	0.438579
mix_13384_1	41.63	22.451	33.005	32.5098	K00586		K03085	93.765	68.8417	0.445767	0.362424	0.362424
mix_13390_1	84.19	61.1264	82.7133	83.2456	K17784		K08335	7.42667	5.875	0.338126	0.0224882	0.0224882
mix_13391_2	84.37	53.5362	87.3083	96.7483	K05864		K09506	29.57	17.12	0.788452	0.184064	0.184064
mix_13392_2	173.13	129.867	232.88	270.519	K05864		K00799	620.89	105.285	2.56004	9.29518	9.29518
mix_13413_1	24.7783	15.6779	19.955	16.0428	K04799		K15150	7.425	8.81167	-0.247024	0.0200542	0.0200542
mix_13414_1	2.55333	3.07602	1.56667	2.91838	K04799		K01768	88.925	43.0967	1.04501	0.689822	0.689822
mix_13416_1	1.09333	1.34256	6.015	10.202	K14538		K10706	94.4867	42.7533	1.14407	0.785063	0.785063
mix_13421_1	27.5017	16.9316	30.7933	29.0093	K01739		K17679	210.073	126.35	0.733467	1.23378	1.23378
mix_13422_1	4.78333	3.27404	6.085	6.61826	K01739		K01489	56.0917	16.1517	1.7961	0.648782	0.648782
mix_13423_1	6.79333	4.1602	8.52167	8.43738	K04082		K12864	5.45333	0.03	7.50603	0.20579	0.20579
mix_13424_1	34.3133	17.0906	27.24	24.4864	K03115		K14817	4.67167	3.92333	0.251857	0.0108236	0.0108236
mix_13426_1	13.63	8.03539	21.7817	23.1076	K00685		K05821	66.2867	30.825	1.10462	0.536356	0.536356
mix_13427_1	14.845	9.75156	6.00667	6.46482	K00685		K17794	153.21	75.9917	1.0116	1.1593	1.1593
mix_13428_1	8.25	4.17198	9.43833	8.79816	K00685		K14644	14.7017	15.1417	-0.0425443	0.00634832	0.00634832
mix_1342_1	34.9317	23.2239	2.11	3.30475	K02739		K00988	75.2983	65.42	0.202886	0.142749	0.142749
mix_13430_1	12.725	7.85764	3.66833	3.93119	K04082		K09680	61.94	17.12	1.85519	0.733356	0.733356
mix_13432_1	6.13167	3.48577	6.21833	6.09158	K12183		K12763	63.625	54.145	0.232766	0.137064	0.137064
mix_13433_1	5.78667	4.14131	3.54333	3.49758	K12183		K07127	72.3917	28.5517	1.34225	0.677455	0.677455
mix_13451_1	5.95333	2.70903	6.92167	5.83042	K17983		K14850	60.6883	48.5383	0.322295	0.176016	0.176016
mix_13451_2	53.7167	29.1247	36.8033	32.7759	K03063		K11117	17.1067	10.8817	0.652659	0.0913342	0.0913342
mix_13452_1	7.40167	4.08712	3.555	3.20117	K17983		K01111	19.8417	18.8983	0.0702742	0.0136121	0.0136121
mix_13453_1	10	6.16603	7.79	7.06717	K08098		K05533	131.97	62.7683	1.0721	1.0439	1.0439
mix_13454_3	3.975	2.77894	2.25167	1.71007	K08098		K00624	160.432	147.8	0.118313	0.182339	0.182339
mix_13456_1	7.265	5.15209	9.30333	8.42203	K17983		K06663	13.39	11.0617	0.275587	0.0336928	0.0336928
mix_1345_1	1.60667	2.51563	0.48	1.07331	K00555		K10405	51.69	11.3867	2.18254	0.688337	0.688337
mix_13464_1	9.155	5.05138	4.49167	4.20833	K11767		K13511	35.6767	27.0667	0.398464	0.125005	0.125005
mix_13465_1	5.81167	3.65712	4.70667	4.58073	K11767		K02996	183.197	124.313	0.559412	0.860124	0.860124
mix_13466_1	20.2767	12.6083	27.66	27.1115	K15140		K02309	28.7717	8.70833	1.72418	0.323111	0.323111
mix_13467_2	25.5767	11.1208	18.1967	14.8563	K11560		K03233	2031.04	1025.62	0.98572	15.0651	15.0651
mix_13468_1	4.97333	2.87539	3.615	4.48511	K08329		K10696	98.7533	36.6017	1.43192	0.969088	0.969088
mix_13469_1	19.3767	12.3607	16.0867	14.5729	K01868		K08235	3.88	0.213333	4.18488	0.0856504	0.0856504
mix_13469_2	0	0	0	0	K08329		K11654	62.0517	44.0033	0.495857	0.262941	0.262941
mix_1346_1	0	0	3.48667	5.02098	K01120		K02141	187.208	103.397	0.856455	1.24445	1.24445
mix_13473_1	25.0567	15.683	14.675	15.182	K11879		K06944	153.738	77.5333	0.987588	1.14201	1.14201
mix_13474_1	6.885	4.93446	4.87833	4.72312	K04798		K03349	11.0967	5.06833	1.13054	0.0913761	0.0913761
mix_13475_1	23.165	15.7405	19.0917	17.4113	K18587		K05534	81.66	52.35	0.64144	0.429797	0.429797
mix_13476_1	36.825	21.2603	25.105	24.1765	K18587		K17541	69.445	31.1233	1.15787	0.582227	0.582227
mix_13477_1	7.15	7.1837	3.52	4.87791	K04798		K01610	137.753	109.84	0.326684	0.404424	0.404424
mix_13479_3	12.7183	12.8413	10.77	11.2772	K11879		K17605	54.26	46.7617	0.214563	0.108377	0.108377
mix_13483_1	35.8433	17.1091	35.5483	33.3765	K07541		K20464	75.54	29.1717	1.37267	0.718674	0.718674
mix_13483_2	0	0	0	0	K14857		K01580	177.282	255.942	-0.529772	1.14755	1.14755
mix_13485_1	13.75	7.86814	8.645	8.79991	K14857		K02831	39.43	9.45333	2.0604	0.503596	0.503596
mix_13487_1	20.5283	13.2466	7.96833	8.45063	K14857		K03511	6.81833	0.463333	3.8793	0.141239	0.141239
mix_13488_1	2.29833	5.13923	0	0	K14857		K18712	46.2683	30.5283	0.599876	0.230343	0.230343
mix_13489_2	0.733333	0.783702	1.26167	1.94847	K11778		K01897	333.535	179.045	0.897516	2.30024	2.30024
mix_13492_2	0.468333	0.46863	0.435	0.652169	K11778		K14546	111.177	47.7133	1.22039	0.969539	0.969539
mix_13493_2	41.6783	20.5239	19.9267	17.1064	K16938		K17434	141.083	129.117	0.127872	0.172756	0.172756
mix_13494_1	16.6417	8.78612	14.3067	11.8612	K02911		K11884	127.132	64.34	0.982536	0.940639	0.940639
mix_13498_1	15.9917	10.5593	18.1433	15.3193	K02911		K17980	60.345	47.035	0.3595	0.193015	0.193015
mix_1349_1	0	0	0	0	K11558		K13217	19.0383	8.07167	1.23797	0.167807	0.167807
mix_13500_1	19.8667	13.0031	11.83	11.9554	K15109		K14548	90.0017	59.395	0.59961	0.447899	0.447899
mix_13501_1	10.4567	6.15784	8.65833	8.05092	K15109		K03506	18.525	17.7683	0.0601652	0.010918	0.010918
mix_13502_2	47.1417	17.6726	36.1683	29.573	K09043		K00107	95.3283	31.035	1.61901	1.02292	1.02292
mix_13503_1	22.5317	10.6018	17.3833	13.9567	K09043		K15073	32.8433	24.67	0.412843	0.11872	0.11872
mix_13504_1	140.905	93.509	133.582	138.87	K13993		K15325	21.3533	12.6083	0.760084	0.129069	0.129069
mix_13506_1	4.335	8.81673	5.18333	9.35963	K09043		K17714	38.06	23.7633	0.679538	0.210057	0.210057
mix_13533_1	21.4867	12.1044	16.4967	13.8695	K08900		K09265	40.1717	37.7733	0.0888102	0.0346116	0.0346116
mix_13541_1	20.2817	28.6886	0	0	K11398		K13343	20.2667	14.3267	0.500406	0.0865535	0.0865535
mix_13543_3	12.6267	6.26406	8.78667	9.3678	K01893		K15118	25.38	20.9683	0.27548	0.0638402	0.0638402
mix_13545_1	17.7083	8.4284	13.6767	12.2764	K01893		K11226	49.9067	26.0933	0.935551	0.355509	0.355509
mix_13546_1	18.5767	8.81344	14.7833	11.8724	K11398		K00053	1311.85	601.042	1.12607	10.7703	10.7703
mix_13547_1	5.00833	5.34199	3.06	3.01208	K01893		K00059	20.5817	9.07167	1.18192	0.175239	0.175239
mix_13550_1	13.425	6.72896	47.855	66.6649	K11253		K19308	31.9867	36.1267	-0.175593	0.0598013	0.0598013
mix_13552_1	25.2217	16.885	21.8517	22.099	K01817		K02891	231.113	146.61	0.656617	1.2401	1.2401
mix_13553_1	0	0	0.541667	1.07447	K11253		K03144	27.2367	13.3933	1.02404	0.208033	0.208033
mix_13554_1	1119.18	551.547	783.603	709.705	K11253		K14411	74.3217	52.585	0.499132	0.316716	0.316716
mix_13554_2	8.735	5.89525	8.32667	7.27596	K01817		K09250	572.223	288.68	0.987107	4.24902	4.24902
mix_13555_1	440.765	227.452	288.108	272.227	K01507		K13939	65.67	39.8283	0.721439	0.380553	0.380553
mix_13557_1	2.87833	3.6301	0.563333	0.665374	K01507		K08851	47.44	29.485	0.686123	0.2639	0.2639
mix_13558_1	1.96333	4.39015	2.12667	4.75537	K01507		K07050	30.9417	21.02	0.557788	0.144918	0.144918
mix_13559_1	15.1517	6.98248	14.1517	11.5258	K08342		K15198	18.565	8.43167	1.1387	0.153705	0.153705
mix_13559_2	10.1583	4.90795	9.825	9.02578	K15544		K06965	22.4283	15.1933	0.561884	0.105695	0.105695
mix_13561_1	13.2417	7.9299	9.155	8.581	K08342		K12863	38.72	10.6517	1.862	0.45965	0.45965
mix_13571_2	2.17333	1.69729	2.52667	5.07418	K03024		K00698	244.732	161.728	0.597628	1.21456	1.21456
mix_13573_1	5.015	3.65773	3.14	3.43269	K03024		K00869	26.23	13.9183	0.914231	0.183524	0.183524
mix_13578_1	0.583333	0.841777	2.78	3.98065	K01238		K00162	161.41	104.6	0.625847	0.832408	0.832408
mix_13580_1	1.65667	2.38554	7.045	12.0356	K01238		K02261	7456.75	2329.25	1.67868	82.1378	30
mix_13590_1	26.98	17.1435	25.8283	26.0124	K08490		K02262	5796.49	2902.89	0.99769	43.3964	30
mix_1359_1	8.42667	5.88825	0	0	K02867		K11838	51.8483	23.1667	1.16225	0.43593	0.43593
mix_135_1	0	0	2.01833	3.07369	K08564		K20042	85.755	60.525	0.50269	0.367667	0.367667
mix_13605_1	3.76833	3.55139	0.298333	0.446856	K02136		K02143	54.9167	1e-08	32.3546	8.88403	8.88403
mix_13608_1	558.737	333.34	317.23	301.323	K02136		K09490	446.815	326.765	0.451424	1.74606	1.74606
mix_13622_1	71.4733	40.258	60.115	57.1628	K01900		K03283	12004	12234.1	-0.0273951	3.32003	3.32003
mix_13623_1	44.4533	25.3019	40.96	42.7307	K01900		K14951	77.3017	20.9617	1.88275	0.925025	0.925025
mix_13624_2	18.0883	9.30512	16.1133	15.7368	K07034		K15634	120.443	103.772	0.214942	0.240966	0.240966
mix_1362_1	0	0	0	0	K09467		K10865	30.3283	19.9683	0.602952	0.151632	0.151632
mix_13633_1	62.9417	27.7185	45.83	36.2153	K02931		K17984	43.65	41.3217	0.0790832	0.0335992	0.0335992
mix_13643_1	49.95	33.7922	53.4083	58.7738	K03104		K00365	138.908	55.7017	1.31834	1.28281	1.28281
mix_13644_1	42.0467	25.6557	35.2983	38.7333	K03104		K02958	472.02	50.0017	3.2388	8.45362	8.45362
mix_13647_1	11.1867	5.81666	8.62667	8.25636	K18726		K14553	64.495	44.1767	0.545903	0.296621	0.296621
mix_13648_1	10.7617	5.90978	10.8717	10.8862	K18726		K03097	273.535	196.278	0.478825	1.12479	1.12479
mix_13652_2	7.83	4.62795	7.75	6.5466	K17989		K03884	37.7783	11.2933	1.74209	0.427436	0.427436
mix_13654_1	100.302	44.9555	61.3967	50.1416	K03248		K05758	159.683	120.063	0.411418	0.575464	0.575464
mix_13654_2	11.6817	7.7966	18.6483	19.7461	K14263		K12617	212.385	116.877	0.861695	1.41862	1.41862
mix_13662_1	124.688	74.0207	66.2667	63.0176	K10967		K18716	23.3567	20.4367	0.192674	0.0421893	0.0421893
mix_13663_1	139.203	98.1834	92.78	93.1015	K10967		K06883	157.395	100.985	0.640249	0.827137	0.827137
mix_13667_1	130.38	84.2479	114.997	106.146	K02937		K11121	252.787	135.967	0.894667	1.73902	1.73902
mix_1366_1	5.135	5.74467	0	0	K07407		K10807	311.953	196.767	0.664844	1.6911	1.6911
mix_13670_1	937.582	682.463	441.155	424.934	K02937		K20471	70.06	40.2083	0.801096	0.441678	0.441678
mix_13671_1	120.183	64.6818	93.205	91.9011	K17081		K03508	6.98667	9.315	-0.414951	0.033822	0.033822
mix_13673_1	16.57	9.42804	12.2533	11.6772	K10761		K14713	47.2817	40.98	0.206361	0.0910688	0.0910688
mix_13674_1	9.11167	9.52762	8.885	10.4895	K10761		K15114	19.495	11.2233	0.796603	0.122352	0.122352
mix_1367_1	1.64	2.32018	4.175	6.01344	K14556		K13354	43.21	58.8317	-0.445228	0.227159	0.227159
mix_13696_1	42.3567	28.7054	24.8617	23.0112	K03023		K11279	100.563	32.6067	1.62487	1.08192	1.08192
mix_13696_2	9.14667	6.79105	5.02167	4.37083	K12600		K11573	6.27667	3.78833	0.728435	0.0366585	0.0366585
mix_13697_1	61.0333	38.0126	40.2633	38.7323	K03023		K12479	23.12	17.305	0.417952	0.0844786	0.0844786
mix_13698_1	191.195	102.486	161.737	179.987	K00235		K02207	126.952	118.677	0.097243	0.119428	0.119428
mix_13699_1	246.972	135.422	174.352	173.951	K00235		K03061	98.325	75.8183	0.375012	0.326529	0.326529
mix_1369_2	6.74833	5.21026	0.636667	0.575548	K10873		K14798	106.4	49.7933	1.09547	0.855528	0.855528
mix_1369_3	18.49	12.3552	0.5	0.763763	K07297		K03022	97.265	47.0267	1.04844	0.756407	0.756407
mix_13701_1	15.1117	9.61985	12.3333	13.0826	K02433		K02923	3969.74	2730.98	0.539628	18.0795	18.0795
mix_13702_2	16.92	10.5796	9.19333	9.6736	K02433		K11227	110.833	50.1733	1.1434	0.920474	0.920474
mix_13703_1	62.865	37.7049	37.3467	35.3467	K01899		K19845	72.385	47.99	0.592957	0.356886	0.356886
mix_13704_1	44.8367	26.6303	25.7783	22.7877	K01899		K00671	114.127	68.5417	0.735583	0.671838	0.671838
mix_13710_1	13.1267	7.04314	11.1567	9.0465	K03138		K09245	28.56	31.4733	-0.140134	0.0420636	0.0420636
mix_13713_1	22.0317	15.5268	15.3433	15.8817	K05535		K00058	647.015	356.383	0.860369	4.31647	4.31647
mix_13714_1	24.6767	13.9535	16.525	15.2821	K05535		K08284	53.5967	40.0583	0.420041	0.196695	0.196695
mix_13715_1	14.265	11.4766	8.85333	9.81779	K05535		K06656	103.562	48.1117	1.10603	0.838777	0.838777
mix_13721_1	7.795	4.04071	4.675	4.52086	K11427		K01077	65.215	39.8317	0.711288	0.373592	0.373592
mix_13722_1	43.9767	30.7929	41.8567	38.0582	K00759		K03843	33.7333	19.7867	0.769646	0.205957	0.205957
mix_13723_1	6.27833	4.04912	6.57667	5.28929	K11427		K11365	42.125	24.05	0.80864	0.267559	0.267559
mix_13724_1	28.6567	15.3848	27.2483	26.0568	K00759		K18694	115.54	104.235	0.148553	0.163241	0.163241
mix_13732_1	26.2267	14.402	20.775	18.6972	K01104		K00637	45.0583	23.215	0.956737	0.326598	0.326598
mix_13734_1	15.495	8.14804	11.9	12.0503	K11375		K18156	23.9683	16.3183	0.554636	0.111722	0.111722
mix_13735_1	22.075	10.0927	18.4517	17.8501	K11375		K02838	29.595	20.565	0.525162	0.131711	0.131711
mix_13736_1	10.2667	6.97096	8.23167	7.23825	K02933		K13525	408.518	279.987	0.545043	1.87632	1.87632
mix_13737_1	22.7817	12.1826	16.5283	17.6404	K02933		K02983	0.916667	1e-08	26.4499	0.121229	0.121229
mix_13737_2	19.7933	9.76124	15.4317	12.949	K02906		K05747	59.8967	29.9367	1.00056	0.449419	0.449419
mix_13738_1	10.32	6.22013	8.505	6.917	K02906		K04627	9.33833	6.50333	0.521986	0.0413456	0.0413456
mix_13740_2	3.74333	3.20966	3.63333	3.84728	K09613		K03017	121.525	115.023	0.0793266	0.0938229	0.0938229
mix_13748_1	12.825	8.89925	10.6683	8.26388	K17978		K01164	33.4183	24.1767	0.467024	0.134491	0.134491
mix_13749_1	13.7283	10.365	9.015	7.58018	K17978		K17413	56.3183	42.8383	0.394702	0.195687	0.195687
mix_13750_1	4.745	4.05201	2.41833	3.63006	K17978		K06063	55.3117	66.9217	-0.27489	0.168003	0.168003
mix_13751_1	3.09833	3.49551	1.09167	1.74938	K17978		K12620	57.0633	22.88	1.31848	0.527017	0.527017
mix_13755_1	24.765	14.9982	17.5983	15.4065	K12879		K07442	74.8133	45.7183	0.710523	0.428202	0.428202
mix_13756_1	15.46	10.9956	9.84	8.64924	K12879		K06927	34.605	23.3167	0.569619	0.164966	0.164966
mix_13757_1	17.1883	10.3762	11.2083	9.5554	K12879		K19792	143.992	107.617	0.420084	0.528483	0.528483
mix_13758_1	13.0233	9.32228	10.2267	9.69808	K12879		K05544	90.4033	42.015	1.10547	0.731923	0.731923
mix_1375_1	103.352	90.7859	119.477	142.013	K14709		K12946	199.548	168.5	0.24399	0.449	0.449
mix_13760_1	3.90833	1.75981	1.295	1.06544	K15079		K12571	40.5783	19.2967	1.07236	0.321037	0.321037
mix_13761_1	6.97667	7.34112	6.005	5.06916	K15079		K17967	50.5633	27.7883	0.863612	0.338327	0.338327
mix_13761_2	18.0833	18.8166	19.9933	18.8582	K17978		K11426	12.8483	4.65667	1.46421	0.128155	0.128155
mix_13764_1	25.0667	11.6971	27.2333	25.107	K17607		K05536	176.187	119.775	0.556778	0.823925	0.823925
mix_13766_2	2.06833	2.41752	5.43833	6.38852	K17607		K01288	86.175	47.0683	0.872513	0.581282	0.581282
mix_13768_1	5.75167	2.35841	3.54167	2.75876	K12858		K12182	42.245	17.1517	1.30043	0.386207	0.386207
mix_1376_1	2.45333	3.72347	0	0	K11294		K14325	2.75	1e-08	28.0349	0.385479	0.385479
mix_13771_1	13.3167	7.63332	7.43333	5.96608	K12858		K03032	144.758	85.6733	0.756728	0.871871	0.871871
mix_1377_1	5.60167	4.76304	0.123333	0.275782	K11294		K11667	28.025	15.3783	0.865815	0.187896	0.187896
mix_13781_1	49.5583	28.734	31.8967	27.6617	K06961		K19564	280.522	203.647	0.462044	1.11854	1.11854
mix_13783_1	52.55	31.1072	39.9667	34.1521	K06961		K15110	253.417	164.967	0.619337	1.2956	1.2956
mix_13786_1	8.575	5.33347	6.67333	6.50477	K02208		K03013	154.167	82.3917	0.903921	1.06915	1.06915
mix_13788_1	4.15667	3.75492	4.24667	4.37671	K02208		K12830	61.795	29.28	1.07757	0.490701	0.490701
mix_13789_1	810.498	461.065	459.522	404.246	K03232		K02326	34.8567	24.53	0.506887	0.150512	0.150512
mix_13798_2	8.11333	12.0006	6.46333	14.4525	K14968		K00681	59.6783	55.5617	0.103117	0.0594162	0.0594162
mix_13798_3	12.335	7.74142	10.775	9.1763	K08499		K17973	40.5867	15.8067	1.36047	0.383608	0.383608
mix_13802_2	16.085	9.9549	11.2867	10.3627	K18804		K17765	7.89833	2.62333	1.59015	0.083655	0.083655
mix_13803_1	17.175	9.2509	13.98	11.9943	K18804		K19951	60.2717	15.6117	1.94886	0.739428	0.739428
mix_13803_2	3.73833	7.05261	4.08167	4.3626	K20346		K01526	174.703	90.2783	0.952455	1.26192	1.26192
mix_13805_1	8.40167	4.62448	7.91	7.65946	K01409		K14997	18.555	13.585	0.449793	0.0722818	0.0722818
mix_13806_1	5.87	2.90228	5.305	3.98513	K01409		K19940	47.6767	33.7	0.500535	0.203659	0.203659
mix_13807_2	6.245	3.72733	4.49333	3.68833	K13341		K10771	26.9683	32.525	-0.270283	0.0804001	0.0804001
mix_13808_2	11.6017	5.30619	8.15	7.69129	K13341		K10436	50.0283	3.33833	3.90555	1.04213	1.04213
mix_1380_1	0.378333	0.535052	2.75667	5.71163	K14777		K02603	44.4283	25.9917	0.773431	0.272325	0.272325
mix_1381_1	2.62333	3.63347	3.49167	5.00891	K00004		K15339	9.81	9	0.124328	0.0116931	0.0116931
mix_13822_1	0	0	0	0	K03264		K12691	81.425	46.3483	0.812954	0.519369	0.519369
mix_13822_2	0	0	0	0	K03264		K07304	50.2783	26.8217	0.906538	0.34947	0.34947
mix_13823_1	623.528	276.977	419.652	373.219	K03264		K02263	705.597	505.355	0.481547	2.91565	2.91565
mix_13824_1	370.485	155.871	249.302	217.559	K03264		K14006	246.798	130.115	0.923545	1.74048	1.74048
mix_13826_1	106.702	99.8995	197.615	245.33	K00026		K03850	31.6617	19.9617	0.665505	0.171778	0.171778
mix_13828_1	476.298	321.113	319.455	371.743	K00026		K06269	463.957	323.872	0.518568	2.04271	2.04271
mix_13832_2	0.725	0.689317	0.928333	0.864801	K05925		K03265	234.115	119.703	0.967754	1.71205	1.71205
mix_13834_1	456.188	257.864	308.815	304.189	K02266		K14787	114.187	43.09	1.40597	1.10563	1.10563
mix_13835_2	0	0	0	0	K02266		K15455	140.978	77.5033	0.863143	0.942905	0.942905
mix_13836_1	0.908333	0.878264	0.381667	0.853433	K05925		K20362	65.365	39.1617	0.739076	0.386266	0.386266
mix_13842_1	15.98	11.8676	10.52	8.79968	K17491		K08838	15.135	0.361667	5.38708	0.417409	0.417409
mix_13843_1	22.0183	13.1544	15.64	13.1326	K17491		K06639	40.1633	13.07	1.61962	0.431089	0.431089
mix_13845_1	14.0717	10.0154	10.2117	10.1457	K02685		K03627	194.14	199.648	-0.0403636	0.0794736	0.0794736
mix_13848_1	670.425	383.554	447.082	406.919	K00413		K14319	76.0183	50.7933	0.581708	0.368837	0.368837
mix_13849_1	4.795	3.14746	2.84667	2.09042	K10398		K15564	79.1283	58.43	0.437485	0.300899	0.300899
mix_1384_1	16.05	11.1357	0.318333	0.475479	K11339		K10739	74.405	36.4583	1.02915	0.570476	0.570476
mix_13850_1	4.77833	3.27668	2.68333	1.93464	K10398		K03018	93.8617	66.26	0.502398	0.402224	0.402224
mix_13856_1	1.93	2.76676	1.38833	3.10441	K03685		K12606	109.938	78.4833	0.486236	0.458087	0.458087
mix_13857_1	0	0	0	0	K01464		K09829	89.4417	52.63	0.765062	0.543468	0.543468
mix_13858_1	0	0	0	0	K01464		K12161	82.0783	27.95	1.55415	0.855004	0.855004
mix_13859_1	10.7267	6.75566	7.545	6.28544	K03685		K06693	34.1083	16.1367	1.07978	0.271268	0.271268
mix_1385_1	5.52667	8.47821	0	0	K03259		K05292	70.42	46.22	0.607468	0.354275	0.354275
mix_13860_1	18.4583	12.1696	11.8433	11.2616	K03685		K03847	143.982	75.8	0.925615	1.01717	1.01717
mix_13861_1	0.666667	1.49071	0.243333	0.54411	K01464		K17430	138.455	122.173	0.180488	0.235201	0.235201
mix_13862_1	12.315	5.71739	15.5017	17.7234	K06009		K10080	97.2267	75.9917	0.355511	0.307905	0.307905
mix_13863_1	7.35	5.07092	11.675	12.5602	K06009		K08794	58.21	45.03	0.370381	0.19119	0.19119
mix_13865_1	119.857	90.9328	102.627	109.865	K03841		K11763	60.35	36.9067	0.709472	0.345005	0.345005
mix_13866_1	67.1083	31.4796	35.965	31.6008	K13509		K11648	35.4967	12.3817	1.51948	0.36375	0.36375
mix_13867_1	158.04	116.65	148.858	162.991	K03841		K01408	53.1433	27.5633	0.947138	0.382202	0.382202
mix_13868_1	44.885	24.2724	34.21	30.9598	K13509		K13431	51.335	30.715	0.740999	0.303995	0.303995
mix_13870_1	61.2933	31.2552	55.7667	49.4373	K02734		K03695	281.028	374.012	-0.412368	1.35059	1.35059
mix_13870_2	14.4033	9.50363	6.615	5.35645	K12818		K03857	35.33	19.3033	0.872044	0.238213	0.238213
mix_13871_2	4.67833	2.86048	5.585	4.40212	K12818		K12413	55.6183	50.1283	0.149934	0.0792752	0.0792752
mix_13883_1	19.2783	13.3866	15.86	16.2328	K03424		K08330	26.0367	26.32	-0.0156147	0.00408768	0.00408768
mix_13885_1	27.1067	19.2791	23.3767	22.3527	K03424		K17065	267.157	134.348	0.991708	1.99088	1.99088
mix_13887_1	26.435	9.19495	22.63	21.2163	K11370		K14962	37.6967	24.4083	0.627063	0.194719	0.194719
mix_13888_1	28.9283	10.9683	27.2567	23.8836	K11370		K19783	37.13	9.15333	2.02022	0.467512	0.467512
mix_1388_1	10.4633	6.73077	1.215	2.0783	K12274		K06902	89.4983	58.73	0.607763	0.450439	0.450439
mix_13890_1	6.04833	4.63037	4.14667	3.41531	K15071		K20223	226.382	113.727	0.993187	1.68896	1.68896
mix_13891_1	5.68833	4.30538	4.63667	4.10361	K15071		K14191	106.833	75.225	0.506078	0.460678	0.460678
mix_13893_1	25.13	10.7026	19.9333	17.6653	K02258		K10849	16.3917	12.8867	0.347083	0.0508101	0.0508101
mix_13894_1	54.705	31.8951	49.535	43.2868	K00645		K00031	818.388	484.678	0.755758	4.92402	4.92402
mix_13899_1	27.2767	16.0564	23.4017	23.3662	K02258		K00602	406.967	193.678	1.07125	3.2172	3.2172
mix_13900_1	11.9833	7.65006	11.3233	10.5281	K05389		K02358	358.63	228.523	0.650155	1.9087	1.9087
mix_13901_1	14.1967	10.1983	12.6667	12.2682	K05389		K18203	38.0767	18.6683	1.02831	0.291758	0.291758
mix_13903_1	20.1533	14.0364	18.4883	16.2769	K12795		K05291	67.185	49.48	0.441294	0.257418	0.257418
mix_13904_1	31.51	16.6721	35.24	33.7703	K12795		K03135	32.5867	9.60167	1.76293	0.371874	0.371874
mix_13910_1	16.25	7.8616	20.415	21.4749	K17793		K15102	1512.61	1050.9	0.52541	6.73448	6.73448
mix_13914_1	254.248	159.98	136.617	112.146	K14565		K15196	34.51	21.6417	0.673203	0.189007	0.189007
mix_1391_1	0.265	0.592558	2.01667	3.2783	K11090		K17971	97.105	18.6817	2.37792	1.37666	1.37666
mix_13935_1	58.1933	27.8532	29.195	20.9837	K14783		K11600	25.7583	14.4517	0.833803	0.167636	0.167636
mix_13938_2	84.0933	42.6656	46.2917	39.1832	K14783		K19001	7.66833	5.705	0.426686	0.0285311	0.0285311
mix_1393_1	3.73667	4.66545	0.183333	0.409946	K00838		K00940	1008.79	549.075	0.877551	6.83553	6.83553
mix_1394_1	7.63667	5.76175	0.25	0.376209	K12879		K00062	19.59	23.9483	-0.289808	0.0630888	0.0630888
mix_13951_1	10.825	6.36915	6.87167	6.98263	K12414		K02209	63.8617	47.2767	0.433822	0.241071	0.241071
mix_13952_2	8.89333	5.61314	8.09	7.28305	K12414		K17769	134.498	46.53	1.53136	1.38609	1.38609
mix_13976_1	192.368	85.5065	134.402	119.118	K01626		K00994	56.4933	54.8767	0.0418878	0.0233252	0.0233252
mix_13980_1	3.365	2.52573	2.52667	2.80446	K12578		K14642	26.0883	14.805	0.81732	0.167115	0.167115
mix_13985_1	6.16833	4.86342	5.10167	4.32154	K12578		K05955	59.025	32.525	0.859777	0.393563	0.393563
mix_13986_1	200.827	122.795	10.5567	11.1441	K02922		K19787	11.505	3.34333	1.7829	0.132366	0.132366
mix_13987_1	39.5083	20.0793	23.535	18.9684	K02922		K11270	14.5933	7.63	0.935554	0.103956	0.103956
mix_13988_1	0.53	1.18512	9.13167	13.0196	K17497		K02142	365.357	447.24	-0.291744	1.18535	1.18535
mix_13989_1	0.998333	2.23234	21.685	30.7924	K17497		K16302	156.503	100.703	0.636082	0.818023	0.818023
mix_13990_1	780.983	467.608	22.4917	24.2861	K02866		K01581	134.387	70.7333	0.925928	0.949632	0.949632
mix_13990_2	5.35833	5.13783	0.218333	0.488208	K11376		K14304	55.2483	33.0883	0.739608	0.326673	0.326673
mix_13991_1	4.975	6.33946	20.7117	32.3948	K02866		K02155	322.977	211.753	0.609045	1.62837	1.62837
mix_13992_1	193.227	131.169	85.545	74.5614	K17497		K01193	101.225	128.84	-0.348015	0.40033	0.40033
mix_13993_1	2738.72	1595.01	1726.99	1584.79	K02866		K02940	1137.11	347.78	1.70912	12.6893	12.6893
mix_13994_1	0	0	9.40167	16.0515	K02866		K11786	182.767	87.375	1.06471	1.43811	1.43811
mix_13996_1	10.5067	12.498	1.78833	3.99883	K02866		K20181	21.2817	9.45333	1.17072	0.17991	0.17991
mix_13997_1	5.37333	7.39913	0.57	0.708755	K02866		K04567	425.035	245.142	0.793966	2.66049	2.66049
mix_13999_1	10.845	7.76348	7.635	7.2473	K07277		K13113	6.32333	3.85	0.715827	0.0364117	0.0364117
mix_13_1	0	0	5.65167	4.70782	K09503		K04712	377.53	355.532	0.0866132	0.317464	0.317464
mix_14001_1	7.27167	4.53926	4.87	4.33235	K07277		K15153	39.7433	25.91	0.617204	0.202607	0.202607
mix_14002_1	0.501667	1.12176	0.71	1.04968	K15458		K00381	365.553	212.758	0.780866	2.25792	2.25792
mix_14003_2	31.0667	18.7843	24.795	21.7808	K15458		K17806	67.8967	39.0767	0.797033	0.426307	0.426307
mix_14004_2	31.8433	17.1494	18.2233	15.1936	K15458		K05290	38.7233	15.2017	1.34897	0.363717	0.363717
mix_14007_1	11.8683	7.16348	8.86	8.07973	K18798		K12193	11.5833	3.885	1.57606	0.121895	0.121895
mix_14008_1	14.045	11.1302	10.9783	10.7828	K18798		K09062	22.4933	16.6483	0.43412	0.0849608	0.0849608
mix_14010_1	40.4817	26.7561	30.905	28.941	K01783		K08956	207.46	148.41	0.483245	0.859862	0.859862
mix_14012_1	31.1217	15.4616	22.58	19.6555	K14814		K20280	35.0883	18.8083	0.899619	0.242432	0.242432
mix_14013_1	22.79	10.4587	11.79	8.69141	K14814		K02736	114.643	96.265	0.252069	0.265817	0.265817
mix_14014_1	20.355	10.5285	20.0433	19.4315	K01783		K01687	234.585	116.232	1.01311	1.77708	1.77708
mix_14022_1	50.7117	28.2406	47.0317	44.5012	K17891		K04565	610.492	318.067	0.940642	4.36721	4.36721
mix_14022_2	56.5217	24.309	40.83	46.4617	K07973		K06655	37.365	32.9017	0.183527	0.0644791	0.0644791
mix_14023_1	51.395	22.647	51.4017	49.6073	K17891		K02938	1665.27	521.255	1.67569	18.3197	18.3197
mix_14024_2	21.2533	18.9334	21.2317	25.6812	K07973		K00606	24.3267	13.5117	0.848333	0.160498	0.160498
mix_14028_1	1606.74	1373.25	1558.22	1857	K01568		K11756	48.3217	22.1967	1.12233	0.395723	0.395723
mix_14029_1	0.81	0.471946	119.862	99.2767	K01568		K20520	101.248	74.045	0.451424	0.395658	0.395658
mix_14030_1	1.79833	1.3815	16.7767	28.2829	K01568		K01422	14.965	13.2233	0.178506	0.025159	0.025159
mix_14032_2	0.433333	0.968963	0.828333	1.17862	K06942		K01485	46.6367	44.3967	0.0710133	0.0323229	0.0323229
mix_14036_1	123.618	66.0302	105.315	104.837	K07750		K14284	93.6883	58.065	0.690201	0.523701	0.523701
mix_14037_1	136.638	82.9052	104.58	101.281	K07750		K00860	71.0533	47.2983	0.587113	0.347429	0.347429
mix_14038_1	36.655	27.5862	28.775	26.3941	K20369		K12191	12.6017	10.2483	0.298225	0.0340722	0.0340722
mix_14039_1	21.4817	13.6603	14.735	14.0453	K20369		K02990	79.4417	64.7183	0.295721	0.213156	0.213156
mix_14043_1	6.715	3.29595	6.02	5.76791	K12817		K01951	239.237	135.162	0.823752	1.54206	1.54206
mix_14044_2	8.40833	6.9948	7.33333	6.59847	K03139		K11771	73.6567	34.14	1.10935	0.597923	0.597923
mix_14046_1	31.3267	16.9933	17.93	14.1901	K06874		K12581	74.3983	58.5117	0.346546	0.230297	0.230297
mix_14047_1	36.6467	19.1337	29.635	27.1659	K06874		K06665	76.4033	46.3317	0.721637	0.442851	0.442851
mix_14049_1	68.765	35.1603	60.6167	60.7458	K02219		K15541	62.4733	13.4367	2.21707	0.841487	0.841487
mix_14058_1	4.4	6.32667	20.9233	31.9537	K02993		K15563	26.0517	18.9133	0.461972	0.103863	0.103863
mix_14059_1	0.643333	1.43854	9.685	13.8258	K02993		K16947	31.09	35.995	-0.211346	0.0708907	0.0708907
mix_14060_1	102.975	67.9333	103.012	89.7077	K11344		K01173	80.08	35.9217	1.15659	0.67083	0.67083
mix_14061_1	20.4217	13.7015	7.38	9.03978	K11344		K06030	60.8833	48.9217	0.315574	0.173258	0.173258
mix_14065_1	29.2183	17.0087	22.64	19.7621	K14545		K03034	163.42	171.36	-0.0684458	0.114571	0.114571
mix_14066_1	24.2733	11.1103	17.9983	15.3741	K19841		K16075	59.195	32.06	0.884701	0.403667	0.403667
mix_14067_1	13.2	8.63366	11.1167	10.368	K19841		K17255	112.278	86.9333	0.369098	0.367643	0.367643
mix_14067_2	22.6167	10.6558	20.5983	18.0326	K07305		K08501	13.7283	9.49	0.532676	0.0618393	0.0618393
mix_14068_1	65.38	40.1354	51.525	43.7565	K14545		K12811	55.2	16.665	1.72785	0.620859	0.620859
mix_14069_1	13.4333	30.0378	21.6117	48.3252	K19841		K11274	22.5083	12.065	0.899631	0.155516	0.155516
mix_14075_2	0.69	1.00411	0	0	K03650		K10356	65.8033	31.045	1.0838	0.524821	0.524821
mix_14076_1	14.2717	9.7144	10.8217	9.969	K03650		K00234	939.837	538.353	0.803857	5.94126	5.94126
mix_14079_1	10.1133	7.16217	5.74667	5.44749	K03650		K14376	39.2483	22.3167	0.81451	0.250726	0.250726
mix_1407_1	22.1983	16.9384	0.298333	0.667094	K14834		K20523	98.055	47.765	1.03764	0.756541	0.756541
mix_14082_1	623.09	445.122	358.267	358.05	K02997		K00382	355.812	205.998	0.788481	2.21488	2.21488
mix_14083_1	0	0	9.49833	12.1171	K02997		K01810	568.233	391.393	0.537864	2.58074	2.58074
mix_14085_1	1.16667	1.94075	13.965	20.5211	K02997		K15326	43.3417	18.6367	1.21761	0.377327	0.377327
mix_14086_1	8.4	14.4466	2.14	2.67556	K02997		K19953	50.4267	17.9183	1.49275	0.51011	0.51011
mix_14088_1	786.195	472.243	434.938	425.29	K02875		K08818	3.73667	0.0566667	6.04311	0.114618	0.114618
mix_14100_1	25.3583	13.2134	18.2433	16.7166	K17678		K07195	33.0317	23.7683	0.474809	0.134846	0.134846
mix_14101_1	8.43	4.97336	7.33	5.67718	K17678		K12236	120.458	72.7783	0.726953	0.70237	0.70237
mix_14103_1	3.215	1.68553	3.47333	3.58143	K08850		K17402	67.2833	36.9367	0.865196	0.450853	0.450853
mix_14106_1	2.93833	2.18386	1.04333	1.19706	K08850		K01405	15.5267	14.6967	0.0792592	0.0119774	0.0119774
mix_14110_1	4.80833	3.57464	3.275	3.8075	K10401		K06158	73.025	45.045	0.697023	0.411488	0.411488
mix_14111_1	1.465	1.34496	1.005	1.27223	K10401		K14544	139.15	67.7433	1.03849	1.07428	1.07428
mix_14112_1	7.08333	3.74786	4.61167	4.05061	K10401		K17268	63.175	39.9517	0.661098	0.340884	0.340884
mix_14113_1	19.7967	15.2229	16.26	16.0197	K15109		K00254	246.02	59.8517	2.03931	3.11884	3.11884
mix_14114_1	8.98333	8.23067	8.48	9.14586	K15109		K14791	88.2617	45.3317	0.961268	0.642095	0.642095
mix_14132_2	7.08	4.94699	6.06667	5.06327	K14292		K06210	54.245	51.6133	0.0717464	0.0379747	0.0379747
mix_14144_1	41.6217	23.3778	40.78	35.5505	K09584		K13100	42.2	19.8283	1.08968	0.337955	0.337955
mix_14146_2	8.49167	5.14113	3.59833	3.65823	K10983		K16833	18.6083	14.9117	0.319507	0.0535494	0.0535494
mix_14148_1	108.005	72.1416	85.1183	88.0026	K00102		K03007	168.813	44.4983	1.92361	2.05164	2.05164
mix_1414_1	39.4667	33.4733	1.20667	1.88823	K12897		K17669	43.7433	20.09	1.12259	0.358292	0.358292
mix_1414_2	0.946667	2.11681	0	0	K17676		K14803	149.47	56.0233	1.41576	1.45464	1.45464
mix_14150_1	23.86	10.5025	13.995	11.9577	K00102		K14827	71.8033	52.3617	0.45554	0.28281	0.28281
mix_1415_1	0	0	3.65333	8.1691	K06689		K09540	108.903	58.885	0.887076	0.744205	0.744205
mix_14167_1	78.3283	34.5118	62.0617	52.6307	K02963		K03125	41.3867	15.0233	1.46196	0.412346	0.412346
mix_14169_1	139.142	79.299	107.512	97.7415	K02963		K18155	10.3717	8.17333	0.343651	0.0318651	0.0318651
mix_1416_1	31.3217	26.5575	1.79167	2.35877	K02727		K03122	42.8583	14.9083	1.52346	0.440025	0.440025
mix_14173_1	0	0	6.77667	10.7078	K05917		K12041	81.6417	52.27	0.643322	0.430742	0.430742
mix_14174_1	1.06667	1.35284	6.145	11.0016	K05917		K10625	86.6717	42.795	1.01812	0.659062	0.659062
mix_14182_1	10.56	6.59121	7.595	7.83783	K00121		K14430	155.613	132.263	0.234553	0.337611	0.337611
mix_14183_1	16.565	10.1002	13.23	14.3128	K00121		K01381	310.212	346.572	-0.159901	0.525101	0.525101
mix_14186_2	97.36	96.4383	93.675	100.167	K00121		K00511	165.803	155.993	0.0879886	0.141572	0.141572
mix_14187_1	54.8167	27.4119	49.7367	44.0603	K04371		K08287	88.4683	69.8783	0.340316	0.269439	0.269439
mix_14189_2	6.60667	4.04123	6.48	5.62017	K13535		K11232	53.415	33.665	0.665995	0.289974	0.289974
mix_14190_2	16.7283	12.9461	16.8667	16.3506	K13535		K07478	45.2933	15.645	1.5336	0.467274	0.467274
mix_14191_1	117.768	65.9787	93.5567	80.8349	K04649		K01101	136.983	99.5233	0.460894	0.545022	0.545022
mix_14192_1	95.43	53.9422	68.38	63.9188	K04649		K12411	48.645	30.1083	0.692129	0.272537	0.272537
mix_14193_1	17.88	9.47784	14.5667	14.572	K17732		K02877	1513.63	838.86	0.851515	10.0159	10.0159
mix_14194_1	36.7183	18.3201	33.6667	30.1546	K17732		K12389	32.18	21.4983	0.58194	0.156188	0.156188
mix_14204_1	14.0033	8.37764	12.5767	11.1025	K20521		K15292	47.295	21.155	1.16069	0.397246	0.397246
mix_14207_1	13.4567	8.52967	14.1083	15.5177	K20521		K00294	136.642	65.2333	1.06672	1.07672	1.07672
mix_1421_1	62.4567	52.2298	2.18667	2.3373	K01336		K12767	116.387	52.265	1.15501	0.973971	0.973971
mix_14224_1	8.39333	5.02709	8.23833	6.99643	K11324		K05765	663.722	447.623	0.568293	3.15785	3.15785
mix_14227_1	6.68833	5.18285	6.595	6.35003	K10731		K13342	48.72	31.4	0.63375	0.25388	0.25388
mix_14227_2	0	0	0	0	K03131		K08876	56.6917	28.3283	1.00089	0.425479	0.425479
mix_14229_1	6.935	4.25632	7.25833	6.61289	K10731		K16946	40.5183	18.9633	1.09536	0.32577	0.32577
mix_1422_1	0	0	5.74	12.835	K00507		K11378	34.6217	7.53833	2.19936	0.463625	0.463625
mix_14231_1	31.96	22.9758	24.7783	22.7741	K03848		K11697	2.67667	1e-08	27.9959	0.374678	0.374678
mix_14232_1	16.6833	12.1766	15.3267	16.069	K03848		K09495	89.4867	39.4467	1.18177	0.761847	0.761847
mix_14233_1	43.725	26.6549	39.5567	32.4451	K00968		K15218	29.77	14.6967	1.01837	0.226418	0.226418
mix_14236_1	11.4633	8.45107	9.14	10.6821	K03019		K16675	23.2567	9.58167	1.2793	0.21005	0.21005
mix_14238_1	56.4217	32.8629	52.74	52.5282	K00228		K17907	28.5417	17.6433	0.693946	0.16025	0.16025
mix_14245_1	4.985	4.55675	0.566667	1.26711	K03019		K00128	2366.82	1361.47	0.797789	14.8719	14.8719
mix_1424_1	15.6383	9.81923	0.243333	0.348935	K16938		K14569	196.808	104.503	0.913242	1.37585	1.37585
mix_1425_1	0	0	1.99833	2.23163	K00036		K06666	107.425	52.8717	1.02276	0.819728	0.819728
mix_14260_1	29.445	12.9198	27.425	22.3202	K17908		K15207	31.2867	32.2867	-0.0453905	0.0144281	0.0144281
mix_14264_1	44.3067	23.2884	30.495	27.2107	K09272		K10777	27.8783	14.3	0.963129	0.203116	0.203116
mix_14265_1	18.075	9.83648	12.5467	10.2984	K09272		K12351	70.615	12.79	2.46496	1.02795	1.02795
mix_14274_2	17.0667	9.58769	25.48	23.6415	K00026		K15414	167.905	118.365	0.504403	0.721977	0.721977
mix_14275_1	0	0	0	0	K00026		K11808	80.9383	43.8567	0.884027	0.551611	0.551611
mix_14276_1	50.8183	30.4431	49.69	49.8859	K00026		K10808	118.105	99.3483	0.249502	0.271276	0.271276
mix_14278_1	62.7117	37.9358	80.285	86.0028	K04739		K09102	34.4567	37.4683	-0.120889	0.0434746	0.0434746
mix_1427_1	4.20833	2.7191	0	0	K12880		K14003	80.62	46.13	0.805432	0.510443	0.510443
mix_14280_2	24.025	14.2611	15.8233	14.2176	K14841		K11872	41.9433	23.7267	0.821932	0.269881	0.269881
mix_14283_2	17.2683	10.4995	14.18	12.9333	K14841		K07942	12.3417	10.0267	0.299695	0.0335184	0.0335184
mix_14286_1	648.85	444.722	413.148	434.184	K00030		K02355	115.525	66.46	0.797647	0.725799	0.725799
mix_14287_1	26.5067	17.5409	18.98	17.7297	K01265		K14721	25.2483	13.9683	0.854028	0.167461	0.167461
mix_1428_1	2.48	3.5514	0.188333	0.421126	K14792		K03239	62.6683	19.8367	1.65957	0.684613	0.684613
mix_14293_1	9.6	6.0582	0.393333	0.87952	K17262		K09499	90.635	45.5867	0.991456	0.675289	0.675289
mix_14298_2	89.78	48.8656	65.1417	53.0846	K07034		K12197	18.3767	16.6367	0.143509	0.0251236	0.0251236
mix_14299_1	16.8683	7.54348	10.82	10.2612	K03025		K02865	2275.47	1210.14	0.910988	15.8768	15.8768
mix_142_1	19.8633	14.9537	0.591667	0.711792	K17970		K07953	207.14	114.225	0.858728	1.37983	1.37983
mix_14301_1	16.055	8.85545	10.5967	9.94263	K03025		K11775	35.1367	21.86	0.684684	0.195124	0.195124
mix_14306_1	13.89	9.41425	15.8717	16.4869	K01556		K01733	317.448	174.275	0.865156	2.12709	2.12709
mix_14308_1	15.1167	10.429	17.69	18.2323	K01556		K13915	1.46667	0.608333	1.26961	0.0131722	0.0131722
mix_14311_1	4.11833	4.41968	5.28167	6.55609	K01556		K02145	223.61	169.383	0.400693	0.787348	0.787348
mix_14315_1	167.945	46.6362	114.883	85.4901	K06215		K10577	46.8867	27.4383	0.772985	0.287261	0.287261
mix_14316_1	4.705	3.04898	4.89833	5.56492	K06867		K18192	23.8683	17.6517	0.435293	0.0903669	0.0903669
mix_14318_2	13.1233	8.43436	9.75667	9.2719	K06867		K08294	50.3683	30.175	0.739163	0.297673	0.297673
mix_14320_1	0.568333	0.615668	0.501667	1.12176	K06867		K03687	160.123	121.983	0.3925	0.553634	0.553634
mix_14323_1	20.7067	10.2797	12.2667	11.0734	K08869		K19815	19.9033	13.4583	0.56451	0.094165	0.094165
mix_14326_1	12.6117	7.95515	10.1417	8.23399	K08869		K00914	57.7817	15.615	1.88768	0.692747	0.692747
mix_14328_1	1.32333	2.0455	16.4383	35.7692	K08869		K18182	20.575	8.62167	1.25485	0.183188	0.183188
mix_14333_1	21.985	5.6255	15.5767	12.0784	K09467		K02605	34.325	10.1383	1.75944	0.391153	0.391153
mix_14344_1	4.50833	1.71387	2.89167	2.57645	K19950		K12666	127.6	59.8667	1.0918	1.02338	1.02338
mix_14347_1	15.0083	4.28652	9.58667	8.28196	K19950		K10590	97.68	47.5317	1.03917	0.754501	0.754501
mix_14348_1	9.32	3.36193	5.81167	5.76731	K19950		K15155	26.84	26.0783	0.041533	0.0109893	0.0109893
mix_14350_1	6.73333	3.70578	3.77	3.34399	K19950		K01694	178.757	113.455	0.655877	0.958274	0.958274
mix_14365_1	35.2817	27.2586	33.0917	45.2458	K19808		K00604	25.81	29.0483	-0.170525	0.0467737	0.0467737
mix_14365_3	71.2867	38.0576	47.1467	41.5619	K12412		K11422	30.6167	12.82	1.25592	0.272765	0.272765
mix_14367_1	6.24167	5.10076	3.44333	4.36621	K19808		K01809	147.758	76.515	0.949425	1.06465	1.06465
mix_14370_3	1425	847.081	673.438	621.268	K02995		K14839	7.49667	2.72	1.46264	0.0747167	0.0747167
mix_14371_1	8.03167	10.3533	29.2817	46.9623	K02995		K17777	58.7533	61.795	-0.0728194	0.0438913	0.0438913
mix_14372_1	8.88	11.8648	1.42333	3.03316	K02995		K14168	46.8183	28.92	0.695006	0.263193	0.263193
mix_14376_1	0	0	6.47	10.0976	K02995		K00566	29.7017	20.0433	0.567421	0.141132	0.141132
mix_1437_1	7.82	5.21279	0.223333	0.499389	K17908		K01082	113.458	97.56	0.217801	0.2298	0.2298
mix_14382_1	8.8	5.00922	7.59	7.24107	K19898		K06676	18.2367	8.94	1.0285	0.139755	0.139755
mix_14386_1	11.0283	7.44106	10.2033	8.60302	K12481		K03237	246.782	133.027	0.89152	1.69303	1.69303
mix_14387_1	9.035	4.12079	7.31333	5.72436	K12481		K06990	25.295	24.1617	0.0661323	0.0163534	0.0163534
mix_14392_1	5.325	4.05786	6.04833	6.82469	K08197		K18658	52.5267	26.3783	0.993697	0.392038	0.392038
mix_14394_1	6.79833	5.11035	6.99	6.46744	K08197		K14315	84.0483	50.68	0.729803	0.491625	0.491625
mix_14395_1	0.241667	0.540383	0	0	K08197		K02365	38.4583	8.26667	2.21792	0.518161	0.518161
mix_14396_1	8.91833	7.28037	8.2	7.42786	K06677		K11996	37.1017	19.1783	0.952007	0.267895	0.267895
mix_14397_1	39.275	33.4744	33.2467	36.3673	K01772		K15205	24.4617	17.35	0.495587	0.103607	0.103607
mix_1439_1	0	0	5.55333	8.19101	K14838		K02732	50.68	16.2583	1.64024	0.548974	0.548974
mix_14400_1	6.97667	6.12684	6.25833	4.5745	K06677		K01369	14.905	1.30167	3.51736	0.285024	0.285024
mix_14401_1	4.44333	2.76304	2.83833	3.1812	K09291		K03238	249.44	107.005	1.22101	2.17612	2.17612
mix_14402_1	6.70333	4.40674	2.91333	2.36633	K09291		K08856	15.8767	13.4633	0.237872	0.0348959	0.0348959
mix_14403_1	10.8383	6.62014	6.46833	6.08882	K09291		K00667	541.483	252.28	1.10189	4.3732	4.3732
mix_14404_1	4.63833	3.18601	3.40333	2.70461	K09291		K12882	107.767	51.0167	1.07887	0.856533	0.856533
mix_14406_1	12.79	9.92935	7.37833	6.21743	K09291		K04077	435.94	491.625	-0.173429	0.804332	0.804332
mix_14407_1	5.28333	3.65844	3.23	2.52503	K06675		K14416	35.6133	31.9767	0.155398	0.0525167	0.0525167
mix_14409_1	11.28	7.89709	8.81	6.80443	K06675		K08492	25.9017	13.3233	0.95909	0.188101	0.188101
mix_14411_1	5.50167	4.08256	5.73833	4.93614	K01530		K05302	51.285	30.2767	0.760331	0.310069	0.310069
mix_14412_1	31.9167	12.5974	23.655	22.762	K09518		K14531	25.24	20.8333	0.276818	0.0637697	0.0637697
mix_14413_1	8.76333	5.77807	4.72833	3.79938	K01530		K02180	40.625	22.2483	0.868671	0.273081	0.273081
mix_14419_1	16.0467	9.15688	10.8817	10.3439	K14015		K12398	11.1733	0.243333	5.52098	0.315156	0.315156
mix_14420_1	11.705	6.34054	9.765	7.85572	K14015		K03845	56.42	15.525	1.86161	0.669669	0.669669
mix_14422_1	93.5517	54.1403	54.5	47.0914	K14788		K09235	27.3117	14.3567	0.927797	0.193299	0.193299
mix_14434_2	44.185	20.7657	26.5567	23.1954	K04482		K02949	2586.6	1127.39	1.19807	22.2481	22.2481
mix_14438_1	3.18	3.46829	2.48333	2.01406	K10415		K09424	32.8567	13.1283	1.3235	0.304306	0.304306
mix_1443_1	4.74	3.9564	7.21667	6.69703	K06123		K15628	72.765	48.5867	0.582684	0.353549	0.353549
mix_14440_1	62.7617	41.3047	43.5933	42.3367	K01867		K02908	1343.04	437.832	1.61706	14.3989	14.3989
mix_14443_2	47.8317	29.652	37.7333	36.2746	K02858		K15201	46.5033	12.45	1.90119	0.560407	0.560407
mix_14443_3	35.4417	18.3852	18.865	14.636	K01867		K11397	34.725	7.92333	2.1318	0.454588	0.454588
mix_14444_2	53.91	31.7418	41.4833	35.8792	K02858		K11887	33.8083	26.2017	0.36772	0.110334	0.110334
mix_14445_1	0	0	0	0	K01867		K01537	349.343	230.912	0.597305	1.73294	1.73294
mix_14446_2	194.822	103.542	129.655	103.555	K19788		K18097	50.7367	62.83	-0.308425	0.175134	0.175134
mix_14452_2	68.59	40.8905	54.3317	49.3904	K19704		K03363	20.24	6.62667	1.61085	0.216391	0.216391
mix_14455_1	95.0567	30.2885	64.6783	49.446	K18181		K14550	187.698	89.4983	1.06848	1.4809	1.4809
mix_1445_1	26.485	15.8821	2.175	3.14615	K14022		K03509	48.2667	23.1333	1.06105	0.378796	0.378796
mix_14461_1	20.8133	13.48	11.0217	9.23841	K17053		K11888	93.25	73.1483	0.350279	0.291429	0.291429
mix_14462_1	9.88333	5.89973	6.23667	5.88246	K08339		K11665	64.3017	35.3333	0.863826	0.430337	0.430337
mix_14463_2	19.2083	12.651	12.4083	9.89566	K17053		K11843	51.6883	34.0267	0.603173	0.258505	0.258505
mix_14466_1	5.75667	4.82421	4.985	5.5795	K08339		K17788	45.85	16.8567	1.4436	0.452617	0.452617
mix_14469_1	35.3817	25.7885	22.5283	23.7628	K03114		K11423	43.7517	19.1183	1.19438	0.375454	0.375454
mix_14472_1	38.75	20.6853	34.0233	34.5707	K13162		K20302	61.4667	35.9417	0.774147	0.377042	0.377042
mix_14479_1	0.418333	0.525212	3.97167	7.02751	K14794		K15152	40.5667	11.4367	1.82663	0.474954	0.474954
mix_1447_1	25.0067	18.2144	0.558333	0.665217	K09500		K18655	102.103	68.9833	0.56571	0.483927	0.483927
mix_14482_1	0	0	5.34667	9.91927	K14792		K01950	76.9067	47.5983	0.692198	0.43091	0.43091
mix_14483_1	0.701667	1.08903	6.07167	10.3071	K14792		K13617	23.965	13.655	0.8115	0.152643	0.152643
mix_14484_1	8.14333	5.28419	6.28167	6.07611	K00974		K00077	89.7283	65.2933	0.458628	0.355486	0.355486
mix_14485_1	11.765	8.17749	8.70667	8.31479	K00974		K12391	99.7283	51.4717	0.954225	0.721394	0.721394
mix_14489_1	34.27	19.1835	22.8117	18.1792	K03106		K02889	2823.82	1258.7	1.16571	23.7953	23.7953
mix_1448_1	0	0	2.04167	3.78728	K14842		K15116	32.3033	14.945	1.11202	0.262705	0.262705
mix_14490_2	32.0917	18.2193	22.4983	19.3515	K20311		K15130	38.035	26.01	0.548261	0.175567	0.175567
mix_14491_1	21.15	13.0064	11.5917	8.8529	K20311		K18586	20.7417	8.62833	1.26538	0.185821	0.185821
mix_14492_1	63.32	36.3201	53.835	46.0647	K19306		K11572	4.10333	2.88167	0.509893	0.017808	0.017808
mix_1449_1	0	0	6.83833	8.27828	K02898		K17774	24.0833	11.91	1.01586	0.182821	0.182821
mix_144_1	0.761667	1.10605	2.51333	4.57898	K08257		K14774	55.2567	29.3333	0.913608	0.38641	0.38641
mix_14503_1	4.81167	3.05836	3.16833	3.05532	K11575		K04354	62.56	38.31	0.707519	0.356837	0.356837
mix_14506_1	5.66667	4.66011	4.77667	5.09209	K11575		K04554	37.98	22.1717	0.776523	0.233546	0.233546
mix_14508_1	6.88833	4.56496	8.4	7.25278	K01078		K04043	1156.3	1109.21	0.059983	0.679463	0.679463
mix_14510_1	15.37	12.1281	9.89333	13.7399	K01078		K11564	2.99833	1e-08	28.1596	0.422159	0.422159
mix_14511_1	13.1983	8.47397	7.42167	7.45247	K01942		K01424	148.613	83.2533	0.835984	0.969184	0.969184
mix_14513_2	12.0233	8.19274	9.82833	8.95591	K01942		K00814	162.085	113.212	0.517728	0.712644	0.712644
mix_14516_1	8.52833	5.46465	7.85333	6.80898	K02604		K06634	54.8883	24.7267	1.15043	0.457958	0.457958
mix_14518_1	8.9	4.45309	6.90333	5.32578	K02604		K09578	80.4317	22.7783	1.8201	0.939263	0.939263
mix_1451_1	4.65333	4.02355	0.0433333	0.0968963	K10352		K02729	122.737	39.8767	1.62195	1.31875	1.31875
mix_14527_1	38.175	21.1072	35.1183	33.3502	K19386		K01885	209.495	101.995	1.03842	1.61728	1.61728
mix_14529_1	44.5167	26.0192	37.3367	39.1026	K19386		K18168	178.71	152.747	0.226479	0.375341	0.375341
mix_14532_2	99.195	65.3768	102.855	114.377	K12668		K00953	41.0967	34.5867	0.248805	0.0941521	0.0941521
mix_14533_1	7.17833	6.58869	0	0	K18043		K15289	66.5133	51.07	0.381168	0.224095	0.224095
mix_14535_1	59.0933	43.2132	35.6783	40.1204	K07827		K10969	40.5	37.7417	0.101764	0.0398108	0.0398108
mix_14536_1	79.535	49.6254	49.5983	47.7174	K07827		K13107	16.7433	3.32667	2.33144	0.23396	0.23396
mix_14540_1	0.805	0.896526	0.495	0.561241	K08139		K01785	31.7867	17.58	0.854487	0.210916	0.210916
mix_14545_1	1.33333	1.11205	1.09167	1.0157	K08139		K01710	1e-08	1e-08	0	0	0
mix_14546_1	124.535	50.5424	95.145	83.2544	K02728		K02730	124.308	67.3783	0.883566	0.846839	0.846839
mix_14549_2	19.6033	15.534	14.1433	13.0003	K15732		K11764	51.2617	37.515	0.450413	0.199931	0.199931
mix_1454_1	0	0	5.59333	5.6019	K14776		K00223	129.977	71.1717	0.868878	0.873867	0.873867
mix_14551_1	1.72833	3.01418	0	0	K15732		K08787	43.68	37	0.239448	0.0965932	0.0965932
mix_14552_1	15.7867	8.94566	14.0117	11.4938	K11849		K02900	1854.74	661.268	1.48791	18.7179	18.7179
mix_14553_1	12.9233	8.39151	10.5133	8.91875	K11849		K01057	201.132	178.767	0.170062	0.323032	0.323032
mix_14554_1	12.9717	7.98212	11.4117	9.73191	K11849		K15333	68.9383	144.598	-1.06867	1.141	1.141
mix_14555_2	89.72	36.9894	72.8383	56.7819	K09464		K11554	20.0817	19.785	0.0214719	0.00428007	0.00428007
mix_14556_1	95.8917	50.6376	81.0667	63.7176	K09464		K11675	29.275	25.785	0.183137	0.0504177	0.0504177
mix_1455_1	24.885	17.6746	0.71	0.996109	K17785		K09419	63.7483	25.0933	1.34508	0.597497	0.597497
mix_14560_1	8.79167	15.6474	2.23	4.98643	K17802		K03681	44.0733	30.5417	0.529127	0.197404	0.197404
mix_14561_1	5.21667	11.6648	0	0	K17802		K20028	42.0767	35.49	0.245608	0.0952549	0.0952549
mix_14561_2	20.5817	14.3639	13.095	12.548	K01836		K14326	97.9867	57.5417	0.767978	0.597212	0.597212
mix_14563_2	20.47	16.4331	18.6717	19.1736	K01836		K15105	19.8517	14.185	0.484894	0.0825209	0.0825209
mix_14566_1	17.1283	10.8391	27.55	24.3194	K02259		K20059	120.247	49.2533	1.2877	1.09133	1.09133
mix_14570_1	8.405	5.77576	8.065	7.17597	K11885		K17786	179.033	125.773	0.509402	0.776346	0.776346
mix_14571_1	0	0	1.33	2.97397	K01247		K03036	112.45	74.4283	0.59536	0.556299	0.556299
mix_14572_1	14.6883	9.54091	11.39	11.2574	K11885		K08075	11.9983	8.025	0.580261	0.0580938	0.0580938
mix_14573_1	14.0017	13.3469	16.905	16.8788	K18046		K01930	59.895	28.3567	1.07875	0.476006	0.476006
mix_14575_1	13.605	6.42969	12.88	11.3739	K01247		K14549	153.03	85.015	0.848025	1.00934	1.00934
mix_14575_2	50.7117	39.8006	61.06	58.212	K02259		K12769	3.78833	3.68833	0.0385942	0.00144278	0.00144278
mix_14578_1	11.555	8.01074	7.86667	8.03434	K01247		K17421	101.835	67.24	0.598842	0.506246	0.506246
mix_14586_1	133.9	61.2758	94.3733	82.8471	K11244		K15280	133.788	77.0033	0.79696	0.839962	0.839962
mix_14588_1	20.3367	16.6227	15.5633	16.9916	K12346		K09468	67.8417	54.0717	0.327299	0.19951	0.19951
mix_14589_1	30.7567	24.2837	14.625	17.2862	K12346		K01102	62.63	85.8367	-0.45474	0.337569	0.337569
mix_14603_1	16.5317	9.0252	13.1683	12.1223	K04460		K01052	39.1617	29.5667	0.405471	0.139337	0.139337
mix_14604_1	34.3333	17.2943	40.4433	38.7743	K17619		K03495	34.5117	20.315	0.764539	0.209586	0.209586
mix_14606_1	28.8283	16.2603	16.84	13.8948	K04460		K14859	128.777	59.245	1.12011	1.05302	1.05302
mix_14609_1	188.728	113.933	3.895	4.39395	K02987		K13127	12.1033	9.25167	0.387619	0.041388	0.041388
mix_1460_1	6.66	5.29715	0.095	0.105475	K15732		K03869	39.1917	15.0517	1.38062	0.374448	0.374448
mix_14610_1	257.785	168.33	6.73833	6.40548	K02987		K11561	15.0317	9.01667	0.737339	0.0886589	0.0886589
mix_14611_1	108.533	70.0456	1.86167	1.73347	K02987		K08486	76.6067	26.3433	1.54003	0.792731	0.792731
mix_14613_1	5.20833	8.47766	36.3517	56.4185	K02987		K11338	64.14	32.975	0.959852	0.46608	0.46608
mix_14614_1	6.16	5.8273	1.61333	2.16825	K02987		K13367	26.4383	25.8417	0.0329321	0.00860845	0.00860845
mix_14615_1	0.193333	0.432306	14.2517	16.8085	K02987		K11662	27.4817	21.5917	0.347995	0.0853863	0.0853863
mix_14617_1	2.32833	5.20631	0	0	K02987		K01012	32.405	9.195	1.81729	0.377997	0.377997
mix_14619_2	19.0883	14.6847	44.175	43.3132	K09549		K14539	97.64	46.71	1.06374	0.767755	0.767755
mix_14622_1	44.8467	31.1297	29.525	26.2882	K12670		K08507	20.565	18.3717	0.162709	0.0316766	0.0316766
mix_14623_1	24.3	19.6225	12.5117	12.2175	K12670		K03257	1669.95	805.012	1.05273	13.0273	13.0273
mix_1462_1	13.9667	10.8705	0.201667	0.45094	K17917		K19836	204.787	151.892	0.431079	0.768783	0.768783
mix_14638_1	175.295	103.521	111.175	98.4101	K03016		K01240	8.365	9.2	-0.137268	0.0120556	0.0120556
mix_1463_1	1.475	1.63708	0	0	K12867		K00493	2.93	5.12667	-0.80712	0.0325135	0.0325135
mix_14643_1	3.40167	1.90135	3.65333	4.28947	K03352		K14013	35.845	31.295	0.19584	0.0657434	0.0657434
mix_14644_1	5.11667	3.24035	5.44667	5.15573	K08739		K14651	361.585	252.02	0.520797	1.59782	1.59782
mix_14644_2	2.77167	2.03483	1.34333	1.72404	K03352		K10088	26.3383	13.7883	0.933716	0.187335	0.187335
mix_14645_1	7.26333	2.71871	7.14167	5.76792	K08739		K20372	78.8233	21.5067	1.87384	0.940011	0.940011
mix_14647_1	7.935	10.8454	0.323333	0.387542	K01251		K11360	33.855	14.9517	1.17906	0.287731	0.287731
mix_14648_1	0.095	0.212426	10.9733	12.2728	K01251		K00620	193.197	140.732	0.457123	0.763232	0.763232
mix_14649_1	3.38833	4.08432	21.2683	36.3179	K01251		K14408	37.105	16.4967	1.16944	0.313419	0.313419
mix_14653_1	98.9033	63.8674	100.1	108.61	K03809		K02985	1346.98	523.095	1.36458	12.7594	12.7594
mix_14657_2	120.867	66.1998	106.998	111.975	K02735		K18730	56.9917	22.0167	1.37215	0.542058	0.542058
mix_14657_3	0	0	0	0	K18172		K12273	33.3583	18.5133	0.849483	0.22032	0.22032
mix_14658_2	0	0	0	0	K18172		K03955	409.353	278.085	0.557821	1.91734	1.91734
mix_14659_1	35.2517	26.4459	30.6567	30.9054	K15428		K15908	76.2883	51.365	0.570677	0.364244	0.364244
mix_14664_1	225.32	115.74	129.353	101.455	K07905		K20061	171.142	91.8	0.898625	1.18143	1.18143
mix_14666_1	385.187	248.996	256.118	279.512	K00030		K03544	23.1633	16.8917	0.455531	0.0912315	0.0912315
mix_14669_1	91.5967	60.6342	59.0967	58.1902	K10258		K15305	42.1767	26.3467	0.678825	0.232577	0.232577
mix_14670_1	115.575	73.9755	88.5133	85.4027	K10258		K10295	21.2683	15.9967	0.410936	0.0765676	0.0765676
mix_14677_1	41.98	26.189	33.6117	27.712	K01756		K01228	46.8733	9.075	2.3688	0.662651	0.662651
mix_14679_1	106.018	70.6831	79.3433	77.392	K01756		K14306	46.0567	27.3533	0.751693	0.275909	0.275909
mix_14681_1	37.6733	30.157	0.965	1.21331	K01756		K00797	264.425	130.342	1.02056	2.01442	2.01442
mix_14681_2	0	0	0	0	K15148		K11482	12.725	7.20333	0.820929	0.0817987	0.0817987
mix_14683_1	44.4867	26.5275	21.2667	16.3476	K14835		K03842	59.225	44.2867	0.419334	0.21703	0.21703
mix_14684_1	76.5567	48.9776	39.855	36.7952	K14835		K14729	41.53	29.9833	0.469993	0.168054	0.168054
mix_14685_1	3.86167	2.00442	5.02667	4.27511	K10846		K00420	1385.31	1040.9	0.412376	5.00257	5.00257
mix_14686_1	1.50333	2.45608	1.34667	1.45329	K10846		K00695	0.18	1e-08	24.1015	0.0216913	0.0216913
mix_14689_1	13.5483	7.28771	9.31167	7.58068	K14837		K02684	34.3283	10.0917	1.76624	0.392281	0.392281
mix_1468_1	8.97833	5.7959	0.085	0.190066	K03133		K03885	91.2867	76.285	0.259005	0.217009	0.217009
mix_14693_1	24.385	13.1963	12.7767	11.1605	K14837		K14836	92.5333	63.02	0.554163	0.43101	0.43101
mix_14694_1	4.90833	4.42873	5.885	5.40563	K14837		K00794	62.44	28.4417	1.13446	0.51551	0.51551
mix_14696_1	106.772	67.9004	45.735	42.9529	K07375		K11566	38.375	20.495	0.904895	0.266356	0.266356
mix_14701_1	162.878	183.615	19.41	33.4866	K02956		K03012	30.825	17.3817	0.826534	0.199222	0.199222
mix_14702_1	46.4533	23.5767	54.6067	50.995	K00641		K14303	60	26.6833	1.16902	0.506674	0.506674
mix_14703_1	36.6567	21.0142	34.4133	28.318	K00641		K06505	2.60833	1.12333	1.21534	0.0226763	0.0226763
mix_14704_1	4.015	2.96989	3.68667	3.27227	K03327		K10872	0.88	0.711667	0.306302	0.00243765	0.00243765
mix_14705_1	3.77667	2.33576	3.545	3.65658	K03327		K12737	10.7683	1e-08	30.0041	1.61547	1.61547
mix_14707_1	61.7117	26.4648	46.7867	37.872	K02956		K17261	135.318	72.37	0.902894	0.937602	0.937602
mix_1470_1	30.9867	21.1027	0.778333	0.868455	K17275		K06966	23.4433	25.9267	-0.145259	0.0358572	0.0358572
mix_14712_1	0.446667	0.998777	1.20167	1.403	K03327		K01180	101.635	36.61	1.47309	1.01823	1.01823
mix_1471_1	5.37667	5.49836	0	0	K17279		K11984	13.3283	7.05667	0.917438	0.0935098	0.0935098
mix_1472_1	16.2833	9.57677	11.355	9.38738	K08158		K11551	75.5717	52.0233	0.538687	0.343669	0.343669
mix_14740_1	9.48167	5.06724	5.97833	6.32578	K02214		K19848	28.7783	17.175	0.744673	0.171101	0.171101
mix_14742_1	14.76	9.94747	9.90333	11.2509	K15111		K12597	53.065	32.915	0.689015	0.296208	0.296208
mix_14743_1	10.95	7.4831	8.08333	7.67315	K11271		K11322	45.1417	25.8783	0.802715	0.285044	0.285044
mix_14744_1	9.49	3.02997	9.33833	9.05261	K15111		K17945	40.5733	12.7267	1.67268	0.445768	0.445768
mix_14746_1	12.43	7.49166	9.63333	8.47119	K11271		K02952	121.43	89.0667	0.447167	0.470636	0.470636
mix_14749_1	36.8933	17.8846	19.7183	18.7242	K14854		K20062	119.76	49.7033	1.26873	1.07502	1.07502
mix_1474_1	0	0	3.78667	5.72777	K01866		K17803	46.3967	37.79	0.296017	0.124603	0.124603
mix_14751_1	22.2183	11.0456	14.3383	12.9941	K14854		K15429	38.0883	17.0683	1.15803	0.319365	0.319365
mix_14752_1	7.26667	10.3198	1.18667	2.04695	K02977		K08968	40.11	31.45	0.350902	0.125553	0.125553
mix_14754_1	226.352	132.835	6.11167	7.29608	K08770		K03679	36.5567	19.5033	0.906414	0.254068	0.254068
mix_14756_1	191.833	140.032	134	155.138	K08770		K17738	469.143	484.355	-0.0460361	0.219477	0.219477
mix_14757_1	575.54	334.082	336.872	265.793	K08770		K12493	143.268	73.1683	0.969428	1.0491	1.0491
mix_14758_1	215.757	134.744	151.852	145.596	K08770		K15138	408.242	433.473	-0.0865198	0.364125	0.364125
mix_14759_1	0	0	0	0	K08770		K11407	60.3267	36.915	0.708589	0.344522	0.344522
mix_1475_1	1.565	2.21935	1.85167	2.73136	K01866		K08853	75.4167	27.305	1.46572	0.752805	0.752805
mix_14761_1	1090.76	468.143	864.682	732.477	K08770		K08967	54.0867	46.77	0.20969	0.105743	0.105743
mix_14763_1	0.696667	0.997491	1.765	1.86645	K08770		K03240	79.025	44.395	0.831912	0.513373	0.513373
mix_14768_1	8.02333	10.1631	67.9183	101.906	K08770		K02967	98.6633	71.1167	0.472326	0.400958	0.400958
mix_14769_1	3.75667	5.05341	0	0	K08770		K04709	146.437	62.6733	1.22435	1.28012	1.28012
mix_1476_1	0	0	2.09333	3.70896	K00844		K01301	12.6467	12.7983	-0.0171988	0.00218811	0.00218811
mix_14770_1	381.987	242.193	6.93167	8.15675	K08770		K20300	28.7683	24.8783	0.209592	0.0562195	0.0562195
mix_14770_2	0	0	0	0	K02976		K01624	3316.51	2663.15	0.316534	9.46382	9.46382
mix_14772_1	464.377	268.036	9.44833	11.3194	K08770		K01591	43.2517	24.6517	0.811071	0.275372	0.275372
mix_14773_1	914.595	577.456	19.8067	20.461	K08770		K07252	12.2317	7.19667	0.76522	0.0743348	0.0743348
mix_14774_1	158.165	106.316	89.0767	85.1037	K08770		K19030	42.1933	29.6967	0.506714	0.182138	0.182138
mix_14779_1	10.0367	9.16803	5.66833	4.41257	K11766		K15075	54.5117	27.0017	1.01352	0.413076	0.413076
mix_1477_1	150.678	104.79	5.21667	5.91571	K15040		K05527	48.0967	31.0183	0.632816	0.250326	0.250326
mix_14780_1	6.99333	4.2448	4.655	3.57913	K11766		K17799	16.7167	11.5583	0.532354	0.0752615	0.0752615
mix_14782_1	11.4233	7.13075	9.015	9.32702	K00486		K17292	34.8217	7.63167	2.18992	0.464846	0.464846
mix_14785_1	21.0567	12.0649	17.5817	16.3304	K00486		K04382	112.658	137.828	-0.290918	0.364356	0.364356
mix_14788_1	11.1167	8.1064	9.41	10.1483	K15283		K12462	42.4167	14.59	1.53965	0.438852	0.438852
mix_14789_1	11.7017	9.98093	8.075	8.38537	K15283		K00129	131.437	117.458	0.162219	0.201877	0.201877
mix_14794_1	12.3167	7.3822	8.74333	9.53914	K15081		K02646	46.8267	32.205	0.540046	0.213404	0.213404
mix_14796_1	8.405	7.25211	6.69	7.5447	K15081		K03062	158.348	101.495	0.641693	0.833698	0.833698
mix_14799_1	220.153	120.165	129.027	109.257	K14563		K18803	59.0933	25.9617	1.18661	0.504637	0.504637
mix_14800_1	8.06333	10.8422	0.543333	1.21493	K14563		K06110	40.8567	38.92	0.0700598	0.0279457	0.0279457
mix_14801_1	1.9	3.87251	16.8033	28.1889	K14563		K14674	50.1667	30.13	0.735528	0.295302	0.295302
mix_14803_1	0	0	3.245	5.7066	K17069		K00900	151.625	143.25	0.0819725	0.120858	0.120858
mix_14804_1	236.958	179.401	230.007	273.52	K17069		K19800	122.39	94.125	0.378836	0.410118	0.410118
mix_14805_1	190.567	154.661	224.347	261.293	K17069		K01870	299.938	167.378	0.841553	1.96636	1.96636
mix_14806_1	17.2017	10.5556	10.3917	10.1158	K12188		K12232	38.28	31.9183	0.262206	0.0920319	0.0920319
mix_14806_2	6.14333	2.97118	4.98167	4.27774	K01855		K20195	29.275	19.7917	0.564776	0.138558	0.138558
mix_14808_1	13.14	8.04165	9.22333	8.24344	K01855		K00589	201.513	61.5217	1.71171	2.2512	2.2512
mix_14817_1	202.075	103.683	146.838	134.23	K07975		K01754	184.62	101.002	0.87018	1.24271	1.24271
mix_14822_1	7.305	6.33381	12.0167	11.2378	K01487		K17667	26.65	21.5617	0.305667	0.0736835	0.0736835
mix_14824_1	7.80333	3.91465	11.725	10.8955	K01487		K03564	57.4333	29.2533	0.973287	0.421855	0.421855
mix_14826_1	8.21167	5.37827	6.61167	4.95107	K10884		K12393	77.4317	38.18	1.02011	0.589681	0.589681
mix_14829_1	15.3767	8.10122	10.3267	10.6529	K14812		K10903	2.19	1e-08	27.7064	0.303385	0.303385
mix_14829_2	7.33333	4.63283	4.58333	4.18802	K10884		K16073	279.075	184.388	0.597906	1.38554	1.38554
mix_1482_1	0	0	0.883333	1.97519	K00789		K06875	75.37	18.8233	2.00147	0.942625	0.942625
mix_14830_1	15.1167	9.58701	10.0733	9.38398	K14812		K00276	177.083	107.343	0.722196	1.02706	1.02706
mix_14832_1	22.25	18.7611	24.61	26.6935	K00052		K11363	39.8783	11.8733	1.74788	0.452279	0.452279
mix_14833_1	27.0633	24.2266	23.595	23.8513	K00052		K01634	97.8283	77.1983	0.341683	0.299018	0.299018
mix_14834_1	65.1333	20.8943	52.4233	43.7961	K04487		K15561	68.2767	45.015	0.600987	0.340434	0.340434
mix_14835_1	65.0467	30.7317	56.2033	47.5015	K04487		K18715	47.1433	24.06	0.970417	0.345485	0.345485
mix_14837_2	26.5933	15.425	15.6383	13.3759	K07566		K06661	11.92	8.87667	0.425294	0.0442235	0.0442235
mix_14838_2	20.3967	12.3652	15.38	13.1905	K07566		K09466	29.5883	31.1433	-0.0738949	0.0224388	0.0224388
mix_14840_1	18.38	10.1841	10.6767	8.33247	K00987		K02871	57.3483	46.1467	0.313525	0.162241	0.162241
mix_14845_1	49.8433	30.6223	40.7867	34.1761	K17408		K14567	112.283	40.3983	1.47478	1.12586	1.12586
mix_14846_1	50.6	31.6178	39.085	33.9567	K17408		K02726	103.68	71.62	0.533703	0.467791	0.467791
mix_14846_2	1.39333	1.99498	1.51667	2.16272	K00987		K12836	33.6983	15.8017	1.0926	0.270419	0.270419
mix_14849_1	15.06	7.50306	7.79167	6.26997	K18477		K04523	111.368	71.7567	0.634154	0.580648	0.580648
mix_14852_1	22.32	14.0202	16.205	14.2009	K18477		K14649	11.285	7.53833	0.582089	0.0547843	0.0547843
mix_14854_1	14.7583	15.3355	18.4	20.908	K18278		K12853	54.6967	42.3183	0.37017	0.17956	0.17956
mix_14863_1	8.17667	8.43117	1.585	3.54417	K02915		K11364	14.0133	3.765	1.89608	0.168546	0.168546
mix_14864_1	4.42	7.41545	13.7183	19.4268	K02915		K01653	446.16	257.863	0.790955	2.78425	2.78425
mix_14867_1	0	0	0	0	K02915		K17742	247.882	167.342	0.566855	1.17686	1.17686
mix_1486_1	21.325	16.5284	0.575	0.814038	K11230		K01522	19.1167	10.8367	0.81891	0.122645	0.122645
mix_14870_1	0.146667	0.327957	0.528333	0.842702	K02915		K14770	9.56333	3.96333	1.2708	0.0859484	0.0859484
mix_14871_1	4.13333	2.33061	4.88667	5.56032	K12345		K14811	139.313	63.5467	1.13244	1.14864	1.14864
mix_14874_1	9.085	3.17897	5.21333	4.11811	K13344		K00729	26.7467	11.755	1.18608	0.228331	0.228331
mix_14876_1	23.7383	11.8707	17.11	13.4314	K13344		K01098	49.2083	44.485	0.145584	0.0682011	0.0682011
mix_14878_1	15.1033	7.70454	9.82	8.48996	K15175		K00764	122.473	72.8633	0.749203	0.731734	0.731734
mix_14878_2	42.7783	26.1471	36.0983	31.7493	K08272		K14570	55.6017	28.385	0.969999	0.407335	0.407335
mix_14881_1	7.91667	5.40324	12.7383	12.6565	K12190		K11380	11.7233	12.6417	-0.108804	0.013255	0.013255
mix_14883_1	7.44667	4.5567	8.28	8.38412	K12190		K14018	37.7733	20.0667	0.912567	0.263914	0.263914
mix_14885_1	17.67	12.3438	14.63	14.5992	K15175		K04348	81.26	44.9867	0.853048	0.538472	0.538472
mix_14895_1	9.74667	7.03273	6.61333	5.84088	K14536		K12762	31.5633	27.545	0.196459	0.0580619	0.0580619
mix_14896_1	8.325	4.7761	6.11667	5.61851	K14536		K14764	31.9417	14.4533	1.14404	0.265388	0.265388
mix_1489_1	4.80167	3.53037	0	0	K03136		K03146	139.743	235.913	-0.755478	1.419	1.419
mix_148_1	0	0	0	0	K14799		K00679	28.4233	12.64	1.16908	0.240031	0.240031
mix_14900_2	1.18	1.3291	0.73	0.776617	K14536		K10245	214.138	112.075	0.934079	1.52354	1.52354
mix_1490_1	1.29667	2.89943	0	0	K03136		K12586	54.27	33.2567	0.706511	0.309193	0.309193
mix_14912_2	27.3483	22.2626	16.1533	14.3738	K06316		K11835	77.3517	33.3017	1.21584	0.672683	0.672683
mix_1492_1	0	0	3.35167	6.1053	K03015		K00852	32.8217	24.8233	0.402952	0.116141	0.116141
mix_1493_1	0	0	2.74167	6.13055	K11518		K12589	165.415	99.0783	0.739449	0.977896	0.977896
mix_1494_1	0	0	1.52	2.81572	K10967		K07078	46.4267	51.14	-0.139498	0.068052	0.068052
mix_14963_1	2.485	3.36139	2.40667	2.84762	K01469		K20299	51.4733	20.09	1.35735	0.485682	0.485682
mix_14964_1	36.235	29.4198	9.21667	9.60982	K01469		K00287	78.36	1.55167	5.65823	2.26079	2.26079
mix_14969_1	38.2967	25.1082	18.2167	18.0419	K02213		K11644	96.2983	45.355	1.08625	0.769354	0.769354
mix_1496_1	0	0	0	0	K11541		K04513	950.192	362.948	1.38845	9.11617	9.11617
mix_14970_1	37.235	26.2797	22.4733	23.3805	K02213		K14555	89.5833	53.23	0.750991	0.536257	0.536257
mix_1497_1	2.98167	3.47668	0	0	K11788		K12868	12.5	5.815	1.10408	0.101106	0.101106
mix_14984_1	0.711667	1.05278	5.36167	9.63808	K01953		K14547	94.905	55.97	0.76183	0.574706	0.574706
mix_14985_1	700.748	594.689	17.505	18.9326	K08770		K00452	33.7683	33.8167	-0.00206348	0.000697303	0.000697303
mix_14986_2	326.703	238.6	9.63	12.2141	K08770		K12187	53.9283	33.4933	0.687169	0.300368	0.300368
mix_14991_1	3.43167	7.24401	0.888333	1.26186	K08770		K03521	39.695	21.695	0.871595	0.267536	0.267536
mix_14992_1	2.36	4.40146	0.696667	1.30038	K08770		K04536	7.575	5.95833	0.346337	0.0234355	0.0234355
mix_14993_1	0	0	0	0	K08770		K11403	14.84	11.1617	0.410939	0.0534254	0.0534254
mix_14994_1	2.33833	1.95283	0.32	0.46076	K08770		K01620	297.642	199.948	0.573949	1.42796	1.42796
mix_14996_1	0	0	0	0	K08770		K17450	151.877	74.74	1.02295	1.15909	1.15909
mix_14997_1	0	0	1.74667	3.04365	K08770		K01681	1740.81	951.24	0.871879	11.7357	11.7357
mix_14998_1	15.57	12.9472	0.438333	0.503568	K15158		K01637	296.087	172.247	0.781543	1.83011	1.83011
mix_14999_1	12.715	5.63047	11.7217	11.7221	K09523		K06641	23.045	12.985	0.827608	0.149094	0.149094
mix_1499_1	8.08333	6.1585	0.395	0.461149	K11400		K15178	71.1933	21.6817	1.71527	0.796527	0.796527
mix_14_1	22.4633	17.6018	0.681667	0.876573	K14863		K15440	24.1167	18.5967	0.374986	0.0800846	0.0800846
mix_15000_1	6.99667	3.94647	6.405	5.78916	K09523		K15859	67.0533	29.5017	1.18451	0.571853	0.571853
mix_15004_2	19.18	11.8177	13.2233	11.4007	K14308		K12613	57.5717	37.1717	0.631156	0.298989	0.298989
mix_1500_1	25.02	22.0551	0.903333	1.28409	K01880		K14169	56.29	30.85	0.867608	0.378017	0.378017
mix_15012_1	15.5417	8.23781	10.31	9.2878	K14308		K00384	153.185	83.6883	0.872177	1.03298	1.03298
mix_15029_1	55.94	40.3168	38.4317	35.054	K00819		K14778	51.9783	27.72	0.906983	0.361425	0.361425
mix_15031_1	77.0033	50.8779	49.8617	46.204	K00819		K09247	38.675	41.04	-0.0856294	0.0341298	0.0341298
mix_1504_1	0	0	0	0	K11374		K12847	47.6667	17.9767	1.40686	0.461753	0.461753
mix_1505_1	12.7583	9.99961	0.223333	0.291928	K11374		K14961	51.295	18.98	1.43434	0.503991	0.503991
mix_15098_1	81.6067	43.5779	50.375	43.5175	K09498		K03364	71.4417	44.73	0.675523	0.392383	0.392383
mix_15103_1	12.34	6.17899	10.1067	10.0439	K00102		K17790	61.6717	47.8633	0.365687	0.200278	0.200278
mix_15108_1	0	0	0	0	K01495		K18932	74.5833	42.3683	0.815867	0.477085	0.477085
mix_15109_1	0	0	0	0	K01495		K14676	62.4083	35.9333	0.796416	0.391604	0.391604
mix_15112_2	103.407	49.1559	87.4617	73.0676	K01495		K10601	52.455	34.9617	0.585306	0.255828	0.255828
mix_15113_1	94.7967	53.3343	121.545	127.872	K08286		K15222	86.0683	56.56	0.6057	0.43195	0.43195
mix_15115_2	11.7667	9.05137	0.171667	0.383858	K01495		K03522	118.668	78.8433	0.589874	0.582535	0.582535
mix_15116_1	116.043	64.4663	139.748	141.286	K08286		K03661	47.69	38.9283	0.292866	0.126838	0.126838
mix_1511_1	14.7883	12.9731	0.148333	0.210746	K01187		K03028	159.867	109.258	0.549126	0.738917	0.738917
mix_15121_1	17.345	15.7586	13.205	11.3953	K00859		K01719	48.2217	22.3683	1.10822	0.391148	0.391148
mix_15122_1	13.1983	19.2843	0	0	K00859		K11369	56.5783	38.1833	0.567307	0.268795	0.268795
mix_15123_1	37.99	31.615	22.3333	19.5711	K15543		K03031	132.327	96.48	0.455802	0.521453	0.521453
mix_15125_1	9.005	3.70054	6.92333	5.54144	K15543		K19791	167.977	146.708	0.19531	0.307306	0.307306
mix_15126_1	5.78333	3.85092	3.71833	3.43852	K00859		K15223	28.5867	1.50833	4.24432	0.638663	0.638663
mix_1512_1	10.9433	8.09228	0.405	0.338612	K02212		K12869	62.2	25.46	1.28868	0.564829	0.564829
mix_15130_1	31.3767	20.7336	24.17	20.0609	K14805		K13095	100.597	30.2233	1.73485	1.13476	1.13476
mix_15131_1	20.4367	12.437	12.975	11.5509	K15447		K13303	161.375	96.0383	0.748735	0.963672	0.963672
mix_15132_1	1.35	3.01869	0	0	K15447		K12488	57.7967	39.45	0.550961	0.267896	0.267896
mix_15133_2	18.31	11.1192	14.74	13.1178	K15447		K12771	40.775	30.8933	0.400389	0.143476	0.143476
mix_15138_1	9.715	7.33356	7.77333	5.99842	K10873		K08783	83.7317	55.295	0.598624	0.416124	0.416124
mix_15140_1	11.305	6.71578	8.77833	6.94866	K10873		K08955	240.535	193.552	0.313528	0.680492	0.680492
mix_15143_1	13.3433	6.78277	8.08	6.3315	K14575		K20307	36.3533	11.1867	1.70031	0.404163	0.404163
mix_15144_2	1.56	3.48827	0.46	1.02859	K14575		K01264	384.545	238.91	0.686685	2.14059	2.14059
mix_15145_1	13.1167	8.61031	10.0867	8.1832	K14575		K09243	16.065	10.3083	0.64011	0.0844092	0.0844092
mix_15146_1	13.4233	8.70803	10.5983	12.6148	K17664		K17979	22.445	9.69333	1.21133	0.194651	0.194651
mix_1516_1	0	0	2.43167	4.24823	K12812		K17805	31.4217	18.4317	0.769573	0.191829	0.191829
mix_15170_1	10.675	8.15753	8.23833	8.41929	K06662		K17900	39.6	23.7717	0.736257	0.233289	0.233289
mix_15173_1	12.1167	6.1864	10.0433	9.11524	K06662		K14821	59.47	37.8017	0.653712	0.317938	0.317938
mix_15174_2	0.336667	0.534312	0	0	K06662		K11578	31.6817	23.5533	0.427717	0.118125	0.118125
mix_1517_1	5.03	7.34805	1.35	1.91201	K02875		K19984	28.8667	10.4383	1.46751	0.288403	0.288403
mix_15183_1	14.1083	13.1224	14.7833	13.4586	K15100		K10276	15.105	9.51	0.667509	0.0821537	0.0821537
mix_15188_1	9.44333	7.48751	5.23167	4.66072	K15100		K03001	156.33	119.843	0.383445	0.529486	0.529486
mix_15190_1	7.54333	4.84348	7.48833	7.19908	K10848		K00133	357.943	195.227	0.874581	2.41896	2.41896
mix_15192_1	5.01167	3.73969	5.28167	4.79461	K10848		K14457	53.0633	16.9417	1.64714	0.57654	0.57654
mix_1519_1	0	0	0	0	K04555		K12862	32.3117	16.5583	0.964498	0.235675	0.235675
mix_15201_1	0.375	0.511395	7.815	12.1603	K00088		K11304	25.0433	13.535	0.887732	0.171236	0.171236
mix_15203_1	22.0517	14.7314	10.8617	10.8258	K05293		K12873	20.9733	7	1.58313	0.221427	0.221427
mix_15204_1	17.625	15.5784	10.09	9.99182	K05293		K09413	104.383	67.3867	0.631356	0.54224	0.54224
mix_15205_1	16.05	12.7681	5.90167	5.95328	K01480		K12189	5.71833	1.58	1.85567	0.0677165	0.0677165
mix_15205_2	22.7167	11.5808	15.7117	12.1416	K03327		K00262	594.242	279.203	1.08973	4.75911	4.75911
mix_15207_1	38.0683	15.7271	33.525	25.868	K01480		K07238	82.65	56.2333	0.555589	0.38581	0.38581
mix_15208_1	31.6833	14.2593	21.5683	17.5264	K03327		K15026	132.588	77.735	0.770318	0.810079	0.810079
mix_1520_1	8.06167	7.795	0.351667	0.786351	K04555		K05012	42.2467	14.9717	1.4966	0.428166	0.428166
mix_15222_1	87.9067	44.6031	68.33	55.9938	K03124		K14862	66.2533	38.2067	0.794169	0.414794	0.414794
mix_15227_1	17.89	7.53058	12.685	9.69644	K01054		K07019	366.943	302.863	0.27689	0.927315	0.927315
mix_15229_2	44.1817	18.6074	23.0733	19.7124	K01054		K01456	34.3317	7.475	2.19939	0.459747	0.459747
mix_1522_1	9.61333	6.50267	0.108333	0.193599	K05767		K15731	115.742	81.4867	0.506272	0.499256	0.499256
mix_15230_1	47.6467	24.2224	28.4767	25.832	K14771		K20475	28.7333	14.755	0.961521	0.209075	0.209075
mix_15231_1	33.635	19.0606	17.4817	15.498	K14771		K15255	38.225	23.0483	0.729854	0.223603	0.223603
mix_15244_1	60.0117	24.5504	37.675	32.8211	K05824		K01850	46.64	38.2733	0.285228	0.121098	0.121098
mix_15245_1	16.1533	9.34152	11.5017	9.65049	K15264		K03143	36.265	30.08	0.269773	0.0894905	0.0894905
mix_15246_1	83.56	51.3937	48.9433	48.1955	K05824		K12625	339.07	216.69	0.645951	1.79497	1.79497
mix_15247_1	13.15	7.1706	8.47833	7.29276	K15264		K18914	22.9917	15.48	0.570706	0.10978	0.10978
mix_15248_1	36.0067	46.4761	37.7383	84.3855	K03258		K02139	514.213	320.968	0.679936	2.83935	2.83935
mix_15249_1	78.9567	38.1007	42.5617	34.4082	K03258		K02935	80.145	48.5517	0.723092	0.465297	0.465297
mix_15252_1	2290.48	1300.94	2613.62	2767.86	K08738		K03434	38.6967	29.4717	0.392881	0.13391	0.13391
mix_15255_1	41.255	20.0966	37.3817	32.2882	K09880		K15463	26.7733	11.4517	1.22524	0.234174	0.234174
mix_15256_1	42.6883	19.1803	33.25	27.3705	K10839		K17672	32.2467	23.9417	0.429626	0.1207	0.1207
mix_15257_1	57.97	26.5441	40.0583	34.7183	K10839		K06683	7.74667	6.475	0.258695	0.0183954	0.0183954
mix_15258_1	77.1283	35.4892	77.5	66.0725	K09880		K13025	36.6367	20.5717	0.83263	0.238167	0.238167
mix_15258_4	28.3633	17.408	18.88	16.0923	K17741		K00658	360.272	197.662	0.866052	2.416	2.416
mix_15259_4	37.695	19.9164	26.85	26.505	K17741		K18551	57.1783	46.41	0.301033	0.155917	0.155917
mix_1525_1	22.32	17.2921	0.535	0.633213	K11446		K11132	88.5117	55.7967	0.665689	0.480322	0.480322
mix_15260_1	13.5183	7.20177	13.4533	12.5938	K03844		K02150	57.4967	20.3533	1.49821	0.583179	0.583179
mix_15261_1	9.92833	4.92749	5.49	4.84744	K03844		K14806	87.3417	52.63	0.730785	0.511446	0.511446
mix_15284_1	11.9667	6.75735	14.4167	11.556	K08488		K15068	13.9333	10.5217	0.405177	0.049543	0.049543
mix_15285_1	7.37	4.96805	7.67333	8.25403	K08488		K14715	9.24333	7.145	0.371479	0.0304396	0.0304396
mix_15286_2	7.345	4.99707	5.86	6.40096	K01867		K12948	70.4417	47.2833	0.575097	0.338517	0.338517
mix_15287_2	4.63667	2.74849	3.38167	4.38132	K01867		K18468	38.3917	23.32	0.719225	0.221923	0.221923
mix_15291_1	37.1033	20.2793	22.175	19.5018	K03107		K12732	325.775	145.685	1.16102	2.73688	2.73688
mix_15294_1	36.7583	22.9519	23.5217	19.1758	K03107		K05857	30.1117	17.9517	0.746205	0.179325	0.179325
mix_15298_1	0	0	7.605	11.1006	K13953		K13507	136.28	111.078	0.294996	0.364849	0.364849
mix_15299_1	40.5367	24.8642	41.195	42.4132	K13953		K11115	11.755	7.06167	0.735194	0.0691695	0.0691695
mix_15300_3	640.258	529.798	938.822	1086.16	K13953		K12857	55.735	1e-08	32.3759	9.02236	9.02236
mix_15302_1	75.1783	54.8812	69.3117	78.3352	K13953		K10843	55.055	35.5167	0.632377	0.286377	0.286377
mix_15303_1	0.188333	0.291457	15.585	14.4902	K13953		K04711	85.8467	95.4983	-0.153713	0.139376	0.139376
mix_15305_1	641.81	404.207	481.685	475.849	K01210		K14816	137.225	76.255	0.847639	0.90477	0.90477
mix_15307_1	10.0967	7.1413	4.06833	3.71073	K10352		K04369	1e-08	1e-08	0	0	0
mix_15309_1	9.585	7.71385	5.83667	5.35644	K10352		K12486	46.8633	10.8267	2.11387	0.609746	0.609746
mix_1530_1	31.5733	20.6415	1.52833	1.59076	K01874		K00928	202.952	138.458	0.551684	0.941753	0.941753
mix_15311_1	50.2167	26.5527	39.7333	39.3216	K03035		K06651	32.3417	16.86	0.939789	0.231196	0.231196
mix_15312_1	43.7333	23.1653	31.5133	28.3048	K03035		K15161	17.3917	6.34833	1.45395	0.172583	0.172583
mix_15316_1	29.5567	16.6877	20.7633	19.9035	K17878		K18191	52.9317	33.0567	0.67919	0.292012	0.292012
mix_15316_2	43.73	33.3532	27.2383	21.4716	K01183		K20306	48.3283	23.5633	1.03633	0.372516	0.372516
mix_15320_1	9.1	13.8508	6.24167	8.83752	K17878		K14002	39.725	21.4817	0.886941	0.271434	0.271434
mix_15327_2	14.8383	24.8347	11.45	25.603	K06173		K02885	2368.54	1164.23	1.02463	18.0989	18.0989
mix_15329_1	18.145	11.0726	10.115	7.7904	K06173		K14017	21.8233	22.4533	-0.0410582	0.00908959	0.00908959
mix_1532_1	4.24167	3.40811	0	0	K08158		K01383	13.375	9.36	0.514958	0.0585379	0.0585379
mix_15330_1	15.5617	10.4027	8.21667	7.07668	K06173		K14818	139.458	117.918	0.242046	0.311485	0.311485
[truncated: 12,371 more rows]

## Sheet: Bacterial expression mapping
geneID	MEAN of batch A	SD	MEAN of batch B	SD	KEGG_annotation		KEGG_annotation of main metabolic functions	SUM of expression in batch A	SUM of expression in batch B	Fold Change	Weighted overexpression level	Constrain weight for drawing
mix_10148_1	3.46333	6.02342	2.24333	3.32607	K04086		K04086	8.87667	11.93	-0.426504	0.0443706	0.0443706
mix_10334_1	1182.8	1859.59	4161.28	4157.78	K04077		K04077	1969.66	6998.51	-1.8291	82.0185	30
mix_10335_1	141.157	210.532	362.605	336.973	K01926		K01926	145.078	378.522	-1.38354	3.62212	3.62212
mix_10335_2	301.352	482.171	1136.09	1201.51	K04078		K04078	301.352	1136.09	-1.91455	13.7602	13.7602
mix_10335_3	768.863	1167.47	2830.04	2826.07	K04077		K00981	116.688	165.542	-0.504534	0.711973	0.711973
mix_10336_1	0	0	0	0	K04077		K11749	101.812	168.918	-0.730423	0.988737	0.988737
mix_10433_10	116.688	177.87	165.542	111.872	K00981		K01881	201.373	482.475	-1.26058	4.31023	4.31023
mix_10433_11	101.812	144.414	168.918	123.233	K11749		K03763	292.175	728.458	-1.31801	6.72604	6.72604
mix_10433_12	201.373	287.648	482.475	356.435	K01881		K09748	126.602	223.292	-0.818633	1.43217	1.43217
mix_10433_13	292.175	422.651	728.458	518.573	K03763		K02600	79.5683	219.192	-1.46193	2.18383	2.18383
mix_10433_14	126.602	179.276	223.292	161.395	K09748		K07742	438.563	893.103	-1.02604	6.83173	6.83173
mix_10433_15	79.5683	113.244	219.192	154.41	K02600		K02519	237.933	643.652	-1.43572	6.32856	6.32856
mix_10433_16	438.563	614.594	893.103	641.622	K07742		K02834	225.138	510.287	-1.1805	4.34083	4.34083
mix_10433_18	237.933	338.464	643.652	467.033	K02519		K03177	12.45	42.3217	-1.76525	0.483429	0.483429
mix_10433_19	225.138	321.288	510.287	437.99	K02834		K11753	22.3167	55.4533	-1.31315	0.510619	0.510619
mix_10433_20	12.45	19.7611	42.3217	34.4199	K03177		K03705	611.147	1630.73	-1.41593	15.8717	15.8717
mix_10433_21	22.3167	32.2655	55.4533	48.3721	K11753		K03687	1063.38	3442.98	-1.695	38.1915	30
mix_10433_22	608.82	832.53	1629.87	1435.61	K03705		K04043	990.123	3393.36	-1.77703	38.948	30
mix_10433_23	1063.38	1480.15	3442.98	3671.75	K03687		K03686	256.482	602.443	-1.23197	5.29085	5.29085
mix_10433_24	982.69	1426.67	3386.18	3366.67	K04043		K03596	99.4983	271.258	-1.44692	2.68228	2.68228
mix_10433_25	256.482	368.296	602.443	495.778	K03686		K03778	2206.03	6569.81	-1.5744	69.0833	30
mix_10433_26	99.4983	146.477	271.258	236.522	K03596		K02967	1863.12	3946.74	-1.08294	31.4585	30
mix_10433_3	2007.64	2847.48	5951.94	4279.53	K03778		K02357	889.418	1908.1	-1.1012	15.4031	15.4031
mix_10433_4	1863.12	2587.41	3946.74	2750.02	K02967		K09903	361.887	572.287	-0.6612	3.08838	3.08838
mix_10433_5	889.418	1198.54	1908.1	1278.02	K02357		K02838	101.653	197.217	-0.956124	1.42878	1.42878
mix_10433_6	361.887	512.388	572.287	443.291	K09903		K00806	157.592	228.618	-0.53675	1.03649	1.03649
mix_10433_7	101.653	141.427	197.217	141.385	K02838		K07491	42.47	117.185	-1.46427	1.16889	1.16889
mix_10433_9	157.592	225.489	228.618	163.248	K00806		K01939	70.7567	343.972	-2.28135	4.73071	4.73071
mix_10473_2	6.44	14.4003	21.5233	21.5611	K07491		K01756	66.06	265.372	-2.00617	3.32453	3.32453
mix_10473_5	70.7567	112.246	343.972	401.277	K01939		K00760	299.303	787.438	-1.39556	7.58306	7.58306
mix_10473_6	66.06	110.521	265.372	276.885	K01756		K00857	28.4933	150.027	-2.39652	2.13914	2.13914
mix_10473_7	100.292	170.1	398.308	371.623	K00760		K01462	393.333	876.708	-1.15634	7.34303	7.34303
mix_10474_1	28.4933	45.848	150.027	162.645	K00857		K07496	206.212	527.208	-1.35425	4.96616	4.96616
mix_10476_2	47.8767	65.8521	103.72	71.6151	K01462		K03530	9298.41	19656.9	-1.07998	156.356	30
mix_10477_1	95.5583	145.702	219.413	176.108	K07496		K06346	423.837	908.628	-1.10018	7.32977	7.32977
mix_10477_3	0	0	0	0	K03530		K03650	179.297	389.653	-1.11984	3.18567	3.18567
mix_10478_1	423.837	617.856	908.628	703.751	K06346		K03495	154.01	368.1	-1.25707	3.28165	3.28165
mix_10478_2	179.297	262.477	389.653	302.456	K03650		K03100	133.672	288.467	-1.10971	2.34226	2.34226
mix_10478_3	154.01	228.95	368.1	283.732	K03495		K00761	706.558	1464.18	-1.05121	11.4095	11.4095
mix_10478_4	133.672	207.438	288.467	205.773	K03100		K00088	248.883	719.762	-1.53205	7.42006	7.42006
mix_10483_2	680.162	1010.21	1408.71	1313.31	K00761		K01951	249.048	790.533	-1.6664	8.6618	8.6618
mix_10483_4	248.883	366.866	719.762	620.508	K00088		K02424	1565.05	5683.09	-1.86047	67.4247	30
mix_10483_5	249.048	378.322	790.533	694.997	K01951		K12410	196.4	976.982	-2.31454	13.5792	13.5792
mix_10484_1	25.1533	36.9492	70.64	60.8392	K07496		K07052	37.195	95.45	-1.35964	0.901745	0.901745
mix_10485_2	1208.38	1719.78	4346.33	4105.69	K02424		K01784	235.375	520.772	-1.14569	4.33155	4.33155
mix_10485_4	191.627	266.956	941.667	1042.65	K12410		K00826	61.43	226.517	-1.8826	2.71044	2.71044
mix_10485_5	7201.53	10213.8	16836.6	13669.3	K03530		K01591	147.015	329.905	-1.16609	2.78065	2.78065
mix_10486_1	37.195	54.3072	95.45	104.842	K07052		K00762	68.0817	154.663	-1.18379	1.31842	1.31842
mix_10486_3	206.208	297.314	428.147	309.601	K01784		K00226	38.865	91.105	-1.22906	0.798704	0.798704
mix_10487_1	32.125	45.6053	108.665	88.7611	K07496		K00609	4.75833	30.4767	-2.67918	0.472004	0.472004
mix_10487_7	54.6417	80.5844	226.517	221.31	K00826		K01465	4.74333	33.1067	-2.80315	0.530496	0.530496
mix_10488_2	303.692	467.554	607.392	451.719	K03530		K00611	5.97	40.2083	-2.75169	0.635343	0.635343
mix_10489_1	147.015	211.257	329.905	290.38	K01591		K03758	39.015	64.6567	-0.72877	0.377764	0.377764
mix_10489_2	68.0817	90.4361	154.663	138.708	K00762		K01478	19.24	80.7917	-2.0701	1.03538	1.03538
mix_10489_3	38.865	54.9093	91.105	87.0107	K00226		K02963	1459.31	3439.19	-1.23679	30.2921	30
mix_10489_4	4.75833	7.15675	30.4767	32.8346	K00609		K02939	452.467	1045.36	-1.20811	9.04772	9.04772
mix_10489_5	4.74333	6.22118	33.1067	42.9699	K01465		K02314	1160.03	1919.92	-0.726887	11.1939	11.1939
mix_10489_6	3.75833	5.44008	26.4417	29.8472	K00611		K02313	107.642	343.37	-1.67353	3.7739	3.7739
mix_10489_7	1.57833	3.29792	17.32	19.8774	K03758		K02338	237.047	731.493	-1.62567	7.87265	7.87265
mix_10489_8	16.0067	21.1945	64.2133	56.0926	K01478		K03629	276.935	629.333	-1.18428	5.36636	5.36636
mix_10491_1	0	0	0	0	K07496		K02470	278.698	639.5	-1.19824	5.50111	5.50111
mix_10493_10	1459.31	2113.88	3439.19	2633.86	K02963		K02469	232.993	526.543	-1.17626	4.46708	4.46708
mix_10493_12	452.467	645.865	1045.36	900.63	K02939		K02990	3184.22	6668.74	-1.06647	52.5396	30
mix_10493_13	1160.03	1733.61	1919.92	1854.52	K02314		K03111	1645.49	3628.75	-1.14095	30.0883	30
mix_10493_2	107.642	158.668	343.37	291.443	K02313		K00525	460.822	1284.75	-1.47921	12.9103	12.9103
mix_10493_3	237.047	346.142	731.493	614.208	K02338		K00526	571.307	1510.98	-1.40314	14.6087	14.6087
mix_10493_5	276.935	396.969	629.333	444.872	K03629		K02867	786.858	1590.8	-1.01557	12.0734	12.0734
mix_10493_6	278.698	401.07	639.5	509.99	K02470		K01256	394.512	1358.5	-1.78387	15.6357	15.6357
mix_10493_7	232.993	344.915	526.543	384.134	K02469		K04068	170.755	901.137	-2.39982	12.8617	12.8617
mix_10493_8	3184.22	4503.88	6667.99	4735.88	K02990		K09013	107.768	552.897	-2.35908	7.7928	7.7928
mix_10493_9	1640.39	2363.85	3623.84	2638.19	K03111		K09015	192.758	917.845	-2.25146	12.5024	12.5024
mix_10725_1	427.413	657.723	1148.26	1153.99	K00525		K11717	124.165	625.438	-2.33261	8.74266	8.74266
mix_10725_2	571.307	831.301	1510.98	1062.3	K00526		K04488	134.393	712.11	-2.40564	10.1819	10.1819
mix_10726_1	785.617	1139.35	1590.8	1699.81	K02867		K09014	191.95	915.777	-2.25427	12.4855	12.4855
mix_10727_1	33.4083	51.6617	136.492	115.215	K00525		K10112	4.80333	0.678333	2.82397	0.0774003	0.0774003
mix_1105_10	394.512	623.076	1358.5	1363.78	K01256		K02358	14201.8	34496	-1.28036	311.752	30
mix_1105_3	170.755	324.656	901.137	1004.55	K04068		K00067	5.01833	1e-08	28.9026	0.725215	0.725215
mix_1105_4	107.768	205.769	552.897	576.27	K09013		K00134	31194.4	66757.1	-1.09763	537.574	30
mix_1105_5	191.318	363.995	916.263	1037.78	K09015		K13993	3397.22	16959.8	-2.3197	236.111	30
mix_1105_6	123.82	229.756	623.727	592.065	K11717		K02992	1142.9	2467.64	-1.11044	20.0464	20.0464
mix_1105_7	134.393	248.825	712.11	660.802	K04488		K02982	1116.29	2450.14	-1.13416	20.2245	20.2245
mix_1105_8	187.66	346.419	914.363	960.218	K09014		K02878	891.208	2392.58	-1.42473	23.3926	23.3926
mix_1119_1	4.80333	10.7406	0.678333	1.5168	K10112		K02904	212.878	469.89	-1.14229	3.89961	3.89961
mix_11603_1	1.44167	2.04373	3.54167	5.24666	K02358		K02961	117.243	425.272	-1.85888	5.04235	5.04235
mix_11604_1	5.25333	11.1497	1.77167	2.69407	K02358		K02874	401.945	1281.56	-1.67283	14.0812	14.0812
mix_11605_1	0	0	2.03333	1.70464	K02358		K02895	424.472	1212.67	-1.51445	12.3969	12.3969
mix_11608_1	0	0	0.538333	1.20375	K02358		K02931	436.783	1321.35	-1.59703	14.039	14.039
mix_11609_1	0.655	1.22371	2.675	3.53018	K02358		K02994	276.778	790.165	-1.51342	8.07368	8.07368
mix_1160_1	5.01833	6.31894	0	0	K00067		K02933	448.573	1060.32	-1.24108	9.36332	9.36332
mix_11610_1	7.31	10.608	0.906667	2.02737	K02358		K02881	359.462	968.927	-1.43055	9.50163	9.50163
mix_11611_1	0	0	4.46833	5.83662	K02358		K02355	851.432	1767.48	-1.05373	13.7981	13.7981
mix_11639_1	1.155	2.58266	2.19833	3.13853	K00134		K02988	452.213	1232.46	-1.44647	12.1841	12.1841
mix_11640_1	4.52833	6.5062	0	0	K00134		K02907	1e-08	29.2817	-31.4474	4.60415	4.60415
mix_11641_1	12.5517	26.5878	3.59167	4.82249	K00134		K02876	568.148	1052.99	-0.890157	7.21535	7.21535
mix_11834_1	4.44667	6.67553	10.9533	11.2143	K13993		K03076	353.008	790.145	-1.16242	6.64409	6.64409
mix_12017_1	1142.9	1629.57	2467.64	1745.21	K02992		K00939	354.79	817.942	-1.20503	7.0659	7.0659
mix_12017_10	1116.29	1505.7	2450.14	1663.16	K02982		K02518	192.925	436.81	-1.17897	3.71218	3.71218
mix_12017_11	473.08	631.688	1316.92	913.391	K02878		K02919	1e-08	1e-08	0	0	0
mix_12017_12	212.878	225.331	469.89	347.199	K02904		K02948	897.622	2434.47	-1.43943	23.9816	23.9816
mix_12017_13	117.243	149.491	425.272	367.371	K02961		K03040	905.82	2015.34	-1.15372	16.851	16.851
mix_12017_14	401.945	532.714	1281.56	959.603	K02874		K02946	2854.11	7399.72	-1.37443	70.4658	30
mix_12017_15	424.472	551.077	1212.67	844.984	K02895		K02879	292.693	702.13	-1.26235	6.27907	6.27907
mix_12017_16	436.783	619.01	1321.35	942.677	K02931		K16786	36.1867	91.3567	-1.33605	0.852022	0.852022
mix_12017_17	276.778	376.075	790.165	582.62	K02994		K16787	42.7167	92.9533	-1.12171	0.76091	0.76091
mix_12017_18	448.573	617.16	1059.72	725.748	K02933		K16785	80.8667	190.473	-1.23597	1.67684	1.67684
mix_12017_19	359.462	502.283	968.927	678.062	K02881		K06173	53.2867	122.723	-1.20356	1.0592	1.0592
mix_12017_2	832.258	1200.96	1761.33	1218.2	K02355		K02871	2563.05	5600.5	-1.12769	46.03	30
mix_12017_20	452.213	635.5	1232.46	891.813	K02988		K02996	2922.86	6610.32	-1.17734	56.119	30
mix_12017_21	0	0	29.2817	41.411	K02907		K02906	1287.8	2989.58	-1.21504	25.9859	25.9859
mix_12017_22	568.148	792.576	1052.99	783.209	K02876		K02926	1641.59	3607.49	-1.1359	29.8122	29.8122
mix_12017_23	353.008	491.206	790.145	541.702	K03076		K02892	770.222	1811.08	-1.2335	15.9202	15.9202
mix_12017_24	354.79	478.801	817.942	561.028	K00939		K02886	1386.1	3069.7	-1.14706	25.5554	25.5554
mix_12017_25	192.925	282.751	436.81	320.66	K02518		K02965	888.682	2176.4	-1.29221	19.8037	19.8037
mix_12017_26	0	0	0	0	K02919		K02890	578.28	1135.86	-0.973941	8.34734	8.34734
mix_12017_27	418.128	621.406	1075.66	751.57	K02878		K02654	0.336667	0.736667	-1.12969	0.00606268	0.00606268
mix_12017_28	897.622	1235.87	2434.47	1741.7	K02948		K02950	1314.73	2874.98	-1.12879	23.6464	23.6464
mix_12017_29	905.82	1255.22	2015.34	1383.32	K03040		K03647	395.492	841.343	-1.08905	6.73486	6.73486
mix_12017_3	2854.11	4081.23	7399.72	5447.23	K02946		K03386	17.38	9.16833	0.922697	0.12248	0.12248
mix_12017_30	292.693	422.304	702.13	497.213	K02879		K03387	7.84833	3.60333	1.12305	0.0643042	0.0643042
mix_12017_31	36.1867	49.4117	91.3567	70.7273	K16786		K01953	204.055	425.86	-1.06142	3.34303	3.34303
mix_12017_32	11.6617	15.5672	34.5767	29.3253	K16787		K01928	437.623	803.76	-0.877075	5.44393	5.44393
mix_12017_33	59.4017	83.2885	134.547	103.156	K16785		K17810	181.698	423.37	-1.22037	3.69205	3.69205
mix_12017_34	53.2867	80.3317	122.723	84.1119	K06173		K01779	161.067	420.513	-1.38449	4.02597	4.02597
mix_12017_35	2558.24	3660.52	5598.73	3845.41	K02871		K00841	240.317	776.825	-1.69265	8.60834	8.60834
mix_12017_36	2919.88	4147.79	6609.05	4775.46	K02996		K03624	178.645	564.602	-1.66014	6.16946	6.16946
mix_12017_4	1287.8	1758.02	2989.58	2088.4	K02906		K09710	178.68	387.365	-1.11632	3.15942	3.15942
mix_12017_5	1641.59	2275.47	3607.49	2500.63	K02926		K02913	1e-08	1e-08	0	0	0
mix_12017_6	770.222	1095.46	1811.08	1214.59	K02892		K01934	346.318	628.083	-0.858857	4.18436	4.18436
mix_12017_7	1378.18	1896.06	3069.7	2112.73	K02886		K19225	254.365	377.595	-0.569939	1.80089	1.80089
mix_12017_8	888.682	1168.58	2176.4	1538.56	K02965		K00845	286.795	644.807	-1.16885	5.4445	5.4445
mix_12017_9	578.28	783.577	1135.86	776.899	K02890		K00791	124.137	312.552	-1.33217	2.90871	2.90871
mix_12018_1	0.336667	0.75281	0.736667	1.30456	K02654		K03437	201.902	493.157	-1.28839	4.47754	4.47754
mix_12018_2	1314.73	1894.23	2873.96	1966.71	K02950		K01915	393.97	786.795	-0.997902	5.89144	5.89144
mix_1230_2	95.0617	135.919	216.455	151.522	K03647		K02888	4185.46	8899.17	-1.08829	71.1991	30
mix_12345_1	2.98833	6.68212	4.94	11.0462	K03386		K07584	395.243	970.182	-1.29551	8.84463	8.84463
mix_12345_2	4.77167	7.95772	1.36833	1.94919	K03387		K02899	650.535	2099.44	-1.6903	23.2415	23.2415
mix_12392_1	204.055	288.364	425.86	306.418	K01953		K06950	462.073	932.537	-1.01304	7.06397	7.06397
mix_12392_2	145.08	204.8	369.717	265.96	K01928		K01889	57.1583	131.528	-1.20234	1.13433	1.13433
mix_12392_3	181.698	251.008	423.37	290.291	K17810		K01890	107.117	210.965	-0.977821	1.55513	1.55513
mix_12392_4	161.067	224.453	420.513	290.337	K01779		K07082	92.3033	265.678	-1.52523	2.73001	2.73001
mix_12394_1	27.8383	36.1871	62.21	52.4357	K00841		K00876	506.852	1598.24	-1.65685	17.4391	17.4391
mix_12394_2	74.2383	112.98	319.167	276.757	K00841		K00847	1949	7167.75	-1.87879	85.6422	30
mix_12775_10	178.645	247.985	564.602	458.241	K03624		K01810	857.49	3525.97	-2.03983	44.7075	30
mix_12775_11	16.4267	22.4744	21.5183	16.0903	K09710		K02851	307.883	540.992	-0.813223	3.45162	3.45162
mix_12775_13	0	0	0	0	K02913		K00057	649.64	1591.15	-1.29235	14.4795	14.4795
mix_12775_14	346.318	472.936	628.083	475.646	K01934		K00963	486.467	1111.99	-1.19274	9.53273	9.53273
mix_12775_15	254.365	349.969	377.595	276.284	K19225		K00384	904.565	1845.27	-1.02854	14.1415	14.1415
mix_12775_17	286.795	405.337	644.807	458.42	K00845		K03701	197.433	451.787	-1.19428	3.87674	3.87674
mix_12775_19	124.137	170.609	312.552	227.328	K00791		K06958	212.88	459.017	-1.10851	3.72401	3.72401
mix_12775_2	201.902	275.459	493.157	349.279	K03437		K09762	134.373	353.477	-1.39537	3.40365	3.40365
mix_12775_20	99.3483	143.346	243.723	182.403	K01915		K02242	7.255	29.5183	-2.02456	0.37225	0.37225
mix_12775_24	4185.46	5898.2	8899.17	6299.59	K02888		K03070	310.145	631.802	-1.02653	4.83468	4.83468
mix_12775_25	394.168	555.374	969.302	610.488	K07584		K02836	130.592	309.463	-1.24471	2.73869	2.73869
mix_12775_26	650.535	919.909	2099.44	1456.49	K02899		K06023	160.177	342.082	-1.09468	2.74905	2.74905
mix_12775_3	444.683	634.732	911.268	694.076	K06950		K13292	79.3033	231.497	-1.54554	2.40177	2.40177
mix_12775_5	57.1583	78.8141	131.528	92.7425	K01889		K01990	109.795	209.725	-0.933686	1.49166	1.49166
mix_12775_6	107.117	148.691	210.965	145.602	K01890		K10563	71.4667	202.693	-1.50396	2.06162	2.06162
mix_12775_7	92.3033	133.892	265.678	208.512	K07082		K00859	70.2833	227.17	-1.69252	2.51723	2.51723
mix_12775_9	210.155	303.099	647.058	500.146	K00876		K07738	41.9517	143.662	-1.77588	1.64813	1.64813
mix_13154_1	623.28	836.554	2495.12	2173.61	K00847		K03346	41.97	110.128	-1.39176	1.05842	1.05842
mix_13154_2	857.49	1168.45	3523.51	3187.97	K01810		K11144	40.6217	103.605	-1.35077	0.974087	0.974087
mix_13154_3	943.492	1301.45	3506.19	2997.89	K00847		K01868	681.902	1141.17	-0.742876	6.77157	6.77157
mix_13156_2	382.227	551.273	1166.44	1237.14	K00847		K02520	507.965	1049.33	-1.04667	8.14988	8.14988
mix_1339_1	307.883	445.433	540.992	385.74	K02851		K02916	1842.07	4112.09	-1.15854	34.4906	30
mix_1339_10	649.64	912.201	1591.15	1239.01	K00057		K02887	1050.56	2438.55	-1.21486	21.194	21.194
mix_1339_11	486.467	699.544	1111.99	797.228	K00963		K07015	87.595	149.423	-0.770485	0.913095	0.913095
mix_1339_12	772.078	1111.25	1569.43	1153.2	K00384		K01992	559.465	944.45	-0.755427	5.68049	5.68049
mix_1339_13	175.157	252.513	401.86	323.869	K03701		K06948	333.762	647.542	-0.956155	4.69139	4.69139
mix_1339_14	212.88	301.865	459.017	348.896	K06958		K07574	130.337	252.895	-0.956296	1.83241	1.83241
mix_1339_16	134.373	191.184	353.477	284.327	K09762		K00969	288.072	635.433	-1.14131	5.27004	5.27004
mix_1339_3	3.92167	5.17748	15.9167	15.8912	K01926		K07040	784.275	1161.77	-0.566895	5.51602	5.51602
mix_1339_4	7.255	10.8771	29.5183	30.1439	K02242		K02911	424.163	1279.46	-1.59285	13.5681	13.5681
mix_1339_5	310.145	438.946	631.802	439.191	K03070		K03439	71.565	172.5	-1.26927	1.54892	1.54892
mix_1339_6	130.592	184.125	309.463	218.996	K02836		K06878	98.5917	229.887	-1.22139	2.00599	2.00599
mix_1339_8	160.177	226.282	342.082	276.086	K06023		K03466	90.8117	192.195	-1.08162	1.53053	1.53053
mix_1339_9	79.3033	117.127	231.497	171.904	K13292		K01924	903.72	1469.01	-0.700893	8.31514	8.31514
mix_1351_1	109.795	156.493	209.725	160.197	K01990		K06890	587.163	1239.93	-1.07842	9.85186	9.85186
mix_1351_10	71.4667	95.4724	202.693	153.667	K10563		K02335	83.77	229.347	-1.45302	2.27483	2.27483
mix_1351_11	70.2833	109.362	227.17	185.035	K00859		K00789	264.948	661.583	-1.32021	6.11609	6.11609
mix_1351_12	41.9517	59.2602	143.662	120.162	K07738		K00286	618.683	818.775	-0.404266	2.90558	2.90558
mix_1351_13	41.97	59.6665	110.128	92.7049	K03346		K03744	289.905	519.703	-0.842108	3.40889	3.40889
mix_1351_14	40.6217	60.6147	103.605	79.7876	K11144		K03799	118.717	290.197	-1.28951	2.63649	2.63649
mix_1351_15	681.902	948.619	1141.17	781.605	K01868		K06198	10.9583	35.2933	-1.68737	0.390218	0.390218
mix_1351_16	507.965	718.507	1049.33	751.129	K02520		K03708	176.92	418.572	-1.24238	3.69913	3.69913
mix_1351_17	1842.07	2621.53	4112.09	3045.21	K02916		K03696	316.423	564.36	-0.83476	3.67621	3.67621
mix_1351_18	1050.56	1495.85	2438.55	1906.95	K02887		K03043	961.713	1866.1	-0.956345	13.5218	13.5218
mix_1351_19	87.595	121.55	149.423	108.559	K07015		K03046	744.337	1677.58	-1.17235	14.1967	14.1967
mix_1351_2	44.545	60.8195	92.645	65.2445	K01992		K05946	21.83	47.64	-1.12586	0.391068	0.391068
mix_1351_20	333.762	469.674	647.542	568.19	K06948		K01916	351.857	1325.49	-1.91346	16.0477	16.0477
mix_1351_21	130.337	187.156	252.895	263.959	K07574		K03095	280.43	1005.47	-1.84216	11.8442	11.8442
mix_1351_22	288.072	412.747	635.433	538.93	K00969		K00872	406.303	1327.4	-1.70797	14.8055	14.8055
mix_1351_24	162.253	225.782	365.847	306.995	K09710		K02030	17.87	31.78	-0.830579	0.206191	0.206191
mix_1351_26	784.275	1105.67	1161.77	784.722	K07040		K02028	15.01	35.1617	-1.22808	0.308074	0.308074
mix_1351_27	424.163	803.68	1279.46	1013.16	K02911		K02029	3.27	10.5683	-1.69239	0.117099	0.117099
mix_1351_3	71.565	96.8991	172.5	133.063	K03439		K07404	283.252	1216.77	-2.1029	15.7719	15.7719
mix_1351_5	98.5917	140.143	229.887	181.955	K06878		K03366	835.03	1000.04	-0.260153	2.38699	2.38699
mix_1351_6	90.8117	130.752	192.195	140.709	K03466		K03590	304.468	611.862	-1.00691	4.61332	4.61332
mix_1351_7	903.72	1305.49	1469.01	1281.79	K01924		K02337	55.8733	148.843	-1.41356	1.4469	1.4469
mix_1351_8	587.163	864.375	1239.93	974.323	K06890		K00945	94.3483	346.792	-1.878	4.14231	4.14231
mix_1351_9	83.77	118.899	229.347	180.098	K02335		K02945	3932.96	7762.58	-0.980919	57.3619	30
mix_1364_1	0	0	2.68667	3.96281	K02355		K00873	3040.21	7455.38	-1.29411	67.9121	30
mix_13941_2	22.2767	33.4719	49.9267	41.342	K03701		K00243	134.382	248.587	-0.887413	1.69925	1.69925
mix_13941_3	264.948	375.652	661.583	514.502	K00789		K02859	188.18	447.902	-1.25107	3.97891	3.97891
mix_13942_2	618.683	897.383	818.775	562.935	K00286		K05896	82.1883	137.78	-0.745361	0.819779	0.819779
mix_13942_3	289.905	413.176	519.703	366.128	K03744		K06024	115.673	183.63	-0.666745	0.997796	0.997796
mix_13942_4	109.38	157.422	230.767	180.283	K03799		K06178	101.545	181.042	-0.834203	1.17867	1.17867
mix_13943_4	10.9583	15.0367	35.2933	29.9366	K06198		K03654	49.6617	93.555	-0.913682	0.654273	0.654273
mix_13946_1	176.92	258.073	418.572	288.976	K03708		K03470	174.66	424.548	-1.28138	3.83907	3.83907
mix_13946_2	316.423	447.672	564.36	383.984	K03696		K04096	21.0233	92.3133	-2.13455	1.20961	1.20961
mix_13946_3	960.743	1362.32	1865.35	1369.06	K03043		K03168	258.77	496.71	-0.940733	3.55353	3.55353
mix_13946_4	742.742	1053.03	1674.69	1203.57	K03046		K03667	92.2583	183.283	-0.990324	1.36438	1.36438
mix_13949_1	12.3967	17.7635	27.5833	19.917	K05946		K08591	53.08	96.2783	-0.859043	0.641526	0.641526
mix_13949_2	351.857	499.481	1325.49	1238.73	K01916		K02622	86.245	188.193	-1.1257	1.54468	1.54468
mix_13949_4	280.43	417.439	1005.47	754.758	K03095		K02621	95.2417	215.678	-1.17922	1.83321	1.83321
mix_13949_5	406.303	601.108	1327.4	1176.64	K00872		K15986	825.598	1778.31	-1.10699	14.4125	14.4125
mix_1403_1	5.92833	8.1542	12.3533	8.90221	K02030		K03977	164.862	234.86	-0.510545	1.02038	1.02038
mix_1403_2	5.43	7.29414	13.1	9.85534	K02028		K00974	61.4733	193.87	-1.65706	2.11559	2.11559
mix_1403_3	3.27	4.83936	10.5683	7.38893	K02029		K15738	64.5033	172.142	-1.41615	1.67562	1.67562
mix_1441_4	283.252	429.05	1216.77	1243.39	K07404		K00560	120.802	328.353	-1.44261	3.23977	3.23977
mix_1473_1	275.607	412.928	343.167	365.587	K03366		K00287	232.125	533.708	-1.20115	4.5994	4.5994
mix_1483_1	2.60167	3.68568	0	0	K03590		K14540	115.882	301.273	-1.37842	2.87508	2.87508
mix_14914_1	55.8733	83.561	148.843	135.455	K02337		K01892	230.253	400.783	-0.7996	2.52289	2.52289
mix_14914_12	94.3483	139.668	346.792	298.263	K00945		K01876	467.725	823.807	-0.816645	5.27362	5.27362
mix_14914_13	3455.77	4753.07	6727.43	4570.78	K02945		K04075	524.715	790.833	-0.59184	3.89297	3.89297
mix_14914_2	844.183	1182.68	1733.91	1369.22	K00873		K03798	582.67	1039.48	-0.835116	6.77343	6.77343
mix_14914_3	134.382	191.014	248.587	177.242	K00243		K04083	51.1233	109.383	-1.09734	0.880651	0.880651
mix_14914_4	188.18	265.062	447.902	355.119	K02859		K04567	818.117	2573.02	-1.65308	28.0291	28.0291
mix_14914_5	82.1883	115.766	137.78	97.0406	K05896		K01929	167.898	499.09	-1.57171	5.24157	5.24157
mix_14914_6	115.673	157.947	183.63	121.426	K06024		K01775	121.797	315.978	-1.37535	3.01047	3.01047
mix_14914_7	101.545	148.607	181.042	129.217	K06178		K07171	78.3333	171.983	-1.13457	1.42001	1.42001
mix_14914_9	49.6617	70.6043	93.555	65.2036	K03654		K01056	286.48	601.217	-1.06945	4.74674	4.74674
mix_14915_1	2191.47	3050.35	5718.4	4004.17	K00873		K03723	136.078	276.412	-1.02238	2.10861	2.10861
mix_14916_1	474.24	713.274	1033.13	722.398	K02945		K13052	301.042	533.045	-0.824294	3.43766	3.43766
mix_14916_10	174.66	259.053	424.548	324.602	K03470		K07571	658.075	1100.89	-0.742342	6.52876	6.52876
mix_14916_12	21.0233	30.1881	92.3133	115.087	K04096		K01151	88.945	285.222	-1.6811	3.14505	3.14505
mix_14916_13	258.77	365.177	496.71	391.609	K03168		K03811	1117.59	6378.3	-2.51278	94.1776	30
mix_14916_14	92.2583	130.811	183.283	148.726	K03667		K02914	1e-08	1e-08	0	0	0
mix_14916_16	53.08	75.4264	96.2783	85.1058	K08591		K03536	333.493	636.27	-0.931981	4.51901	4.51901
mix_14916_17	86.245	126.66	188.193	171.705	K02622		K03217	578.772	1016.17	-0.812076	6.47607	6.47607
mix_14916_18	95.2417	139.882	215.678	179.758	K02621		K03657	225.473	598.603	-1.40864	5.80415	5.80415
mix_14916_19	825.598	1166.98	1778.31	1425.92	K15986		K00867	112.147	235.96	-1.07316	1.86786	1.86786
mix_14916_2	164.862	229.834	234.86	161.73	K03977		K06180	162.31	358.092	-1.14158	2.97039	2.97039
mix_14916_4	61.4733	89.2729	193.87	164.533	K00974		K16264	135.922	335.19	-1.3022	3.06742	3.06742
mix_14916_5	64.5033	93.1278	172.142	134.811	K15738		K00058	101.295	222.707	-1.13658	1.84127	1.84127
mix_14916_6	120.802	172.463	328.353	272.343	K00560		K03501	180.46	417.81	-1.21117	3.62303	3.62303
mix_14916_7	232.125	359.1	533.708	429.309	K00287		K03496	185.438	403.43	-1.12138	3.30172	3.30172
mix_14916_9	115.882	165.383	301.273	235.129	K14540		K03497	335.245	799.65	-1.25415	7.11666	7.11666
mix_1561_2	230.253	322.03	400.783	344.703	K01892		K06942	553.633	1297.66	-1.22891	11.3754	11.3754
mix_1561_3	467.725	661.418	823.807	606.832	K01876		K07566	131.057	247.04	-0.914554	1.72895	1.72895
mix_1632_10	524.715	739.445	790.833	527.078	K04075		K00564	316.663	762.497	-1.26778	6.84069	6.84069
mix_1632_11	199.012	281.006	389.13	258.424	K00760		K07056	147.765	360.545	-1.28687	3.27066	3.27066
mix_1632_12	582.67	841.277	1039.48	708.299	K03798		K01071	137.912	306.947	-1.15424	2.56737	2.56737
mix_1632_13	51.1233	74.8133	109.383	77.2327	K04083		K01409	270.88	469.705	-0.794101	2.9405	2.9405
mix_1632_15	818.117	1156.5	2573.02	2093.47	K04567		K11991	95.885	206.758	-1.10857	1.6775	1.6775
mix_1632_2	163.353	232.373	449.065	436.251	K01929		K02343	303.682	524.768	-0.789121	3.26874	3.26874
mix_1632_3	121.797	174.196	315.978	268.928	K01775		K09747	165.075	384.618	-1.22031	3.35397	3.35397
mix_1632_4	78.3333	110.004	171.983	147.44	K07171		K06187	150.308	358.09	-1.2524	3.18358	3.18358
mix_1632_5	286.48	398.016	601.217	428.614	K01056		K00943	96.4267	219.968	-1.18979	1.88222	1.88222
mix_1632_6	136.078	192.073	276.412	220.617	K03723		K02341	83.0817	200.4	-1.27028	1.80051	1.80051
mix_1632_8	301.042	419.282	533.045	431.692	K13052		K02986	2647.14	5357.1	-1.01702	40.7023	30
mix_1632_9	658.075	914.544	1100.89	730.517	K07571		K01215	4.575	0.948333	2.27031	0.0626983	0.0626983
mix_1652_1	88.945	130.321	285.222	221.028	K01151		K00574	183.048	532.428	-1.54036	5.51047	5.51047
mix_16592_2	1117.59	2019.04	6378.3	7809.34	K03811		K05847	15.1217	46.3833	-1.61699	0.497265	0.497265
mix_1661_1	0	0	0	0	K02914		K05845	22.1383	38.6733	-0.804793	0.244704	0.244704
mix_1661_2	333.493	476.916	636.27	452.15	K03536		K06216	809.498	2316.9	-1.5171	23.7152	23.7152
mix_1661_3	331.003	474.184	594.087	411.6	K03217		K01488	84.4933	166.125	-0.97536	1.22222	1.22222
mix_1694_1	123.723	183.771	305.783	250.492	K03657		K00033	2910.91	7998.31	-1.45823	79.5406	30
mix_1694_2	112.147	171.072	235.96	185.923	K00867		K01505	10.1367	10.23	-0.0132228	0.00134652	0.00134652
mix_1694_3	68.335	105.656	175.007	135.542	K06180		K01887	258.247	327.733	-0.343773	1.00722	1.00722
mix_1694_6	135.922	203.939	335.19	266.609	K16264		K12555	39.2283	52.8917	-0.431144	0.198585	0.198585
mix_16_12	19.6933	30.4572	79.175	82.0059	K00058		K01689	5550.9	16704.6	-1.58945	176.871	30
mix_16_4	180.46	278.997	417.81	323.461	K03501		K03697	436.307	1092.87	-1.32471	10.1285	10.1285
mix_16_5	185.438	267.226	403.43	327.122	K03496		K01921	368.59	535.925	-0.540014	2.44225	2.44225
mix_16_6	335.245	484.614	799.65	618.522	K03497		K01624	4.66	2.355	0.984603	0.0345349	0.0345349
mix_16_8	553.633	804.51	1297.66	1017.97	K06942		K00627	6.45	1.48333	2.12046	0.0841114	0.0841114
mix_1738_1	131.057	186.725	247.04	170.755	K07566		K03086	646.29	1723.21	-1.41484	16.7623	16.7623
mix_1745_1	105.028	148.132	235.493	186.659	K00564		K02109	1114.81	1868.4	-0.744998	11.1124	11.1124
mix_1745_10	147.765	213.564	360.545	310.675	K07056		K02113	1645.61	2715.47	-0.722582	15.7562	15.7562
mix_1745_11	134.845	194.997	292.363	232.291	K01071		K02111	1897.03	3119.55	-0.717594	17.9993	17.9993
mix_1745_13	270.88	401.698	469.705	355.394	K01409		K02115	1474.37	3215.88	-1.12512	26.3854	26.3854
mix_1745_2	95.885	138.384	206.758	168.475	K11991		K02112	6980.59	15318.9	-1.1339	126.427	30
mix_1745_3	303.682	432.263	524.768	474.519	K02343		K07104	203.513	394.633	-0.95539	2.85732	2.85732
mix_1745_4	165.075	232.576	384.618	303.423	K09747		K02835	90.3183	249.538	-1.46617	2.49144	2.49144
mix_1745_5	150.308	210.46	358.09	329.593	K06187		K02493	112.547	258.027	-1.197	2.21788	2.21788
mix_1745_6	96.4267	140.615	219.968	183.389	K00943		K02108	1571.84	2601.31	-0.726782	15.1648	15.1648
mix_1745_8	83.0817	117.933	200.4	162.606	K02341		K02110	277.277	671.205	-1.27543	6.0486	6.0486
mix_1745_9	211.635	305.358	527.003	477.818	K00564		K01246	239.003	500.998	-1.06778	3.95078	3.95078
mix_1746_11	3.06667	5.49694	14.5833	11.3371	K01071		K03569	461.222	930.468	-1.0125	7.04541	7.04541
mix_1773_2	2645.36	3807.9	5355.42	3527.79	K02986		K05837	110.367	207.938	-0.913851	1.45442	1.45442
mix_1782_1	0.69	1.54289	0.363333	0.812438	K01215		K02071	67.695	99.825	-0.560352	0.469351	0.469351
mix_1783_1	3.885	8.4304	0.585	0.837451	K01215		K02072	72.47	138.038	-0.929613	0.978457	0.978457
mix_17_2	183.048	266.688	532.428	472.314	K00574		K02073	190.34	373.368	-0.972021	2.73968	2.73968
mix_1870_1	1.62833	2.91124	2.62833	4.09469	K02358		K02114	1e-08	8.05	-29.5844	1.19077	1.19077
mix_1875_3	21.8833	31.0386	59.1783	61.2747	K00841		K00036	1041.06	3661.1	-1.81422	42.6538	30
mix_1884_1	2.51667	5.24374	2.06667	3.17991	K04043		K06901	226.397	459.92	-1.02253	3.5089	3.5089
mix_1925_1	15.1217	19.5833	46.3833	35.8583	K05847		K07090	696.75	1262.49	-0.857561	8.40084	8.40084
mix_1925_2	22.1383	30.1885	38.6733	26.3742	K05845		K01955	31.0017	79.9367	-1.36651	0.757993	0.757993
mix_1941_1	19.3833	33.6845	10.5467	7.88563	K06216		K06925	131.302	368.163	-1.48746	3.71467	3.71467
mix_1941_2	48.22	86.1134	18.9783	15.6949	K06216		K02342	35.545	75.6333	-1.08938	0.605575	0.605575
mix_1941_4	84.4933	116.209	166.125	128.977	K01488		K00075	100.493	279.898	-1.4778	2.81072	2.81072
mix_1944_1	1.355	1.16086	0.805	1.00146	K09014		K00927	1162.71	3484.66	-1.58353	36.7962	30
mix_19575_1	2815.55	3961.35	7811.68	6250.44	K00033		K01803	418.998	935.193	-1.15832	7.84294	7.84294
mix_19588_3	5.78833	4.99062	5.18	4.65122	K01505		K15580	203.792	408.985	-1.00495	3.07906	3.07906
mix_19593_1	4.34833	5.33121	5.05	5.93618	K01505		K03075	498.857	1040.85	-1.06106	8.16856	8.16856
mix_1960_1	258.247	362.683	327.733	215.984	K01887		K12573	252.867	560.62	-1.14865	4.67204	4.67204
mix_1960_2	39.2283	57.3654	52.8917	40.0228	K12555		K03664	314.375	775.72	-1.30305	7.10224	7.10224
mix_19660_1	5541.57	8034.48	16696.3	13294.5	K01689		K03648	147.808	392.725	-1.40979	3.8102	3.8102
mix_1971_1	0	0	2.94833	6.59267	K03697		K00625	168.773	413.06	-1.29126	3.7565	3.7565
mix_199_1	3.05333	5.66154	1.05333	1.50177	K03697		K00055	7277.77	23470.7	-1.68929	259.715	30
mix_2094_1	6.87667	15.3767	0	0	K01921		K00135	5427.5	17068.6	-1.65299	185.929	30
mix_2131_1	4.66	10.4201	2.355	3.41336	K01624		K01875	287.892	687.203	-1.25521	6.11975	6.11975
mix_21372_1	10921.4	15386.2	26767.2	21945.2	K02358		K19158	19.3267	49.7533	-1.3642	0.471195	0.471195
mix_21373_1	3251.95	4548.91	7705.69	5766.74	K02358		K15051	220.397	619.102	-1.49007	6.25457	6.25457
mix_2138_1	3.46833	5.23596	0.125	0.279508	K00627		K07284	13.28	25.1467	-0.921112	0.176976	0.176976
mix_2162_1	0.678333	0.5521	1.01667	1.43399	K03086		K15771	5.68833	2.39333	1.24898	0.0504694	0.0504694
mix_21689_10	1114.81	1559.48	1868.4	1323.99	K02109		K03722	68.5383	172.288	-1.32984	1.60131	1.60131
mix_21689_11	1645.61	2266.26	2715.47	1930.63	K02113		K01893	794.24	1555.76	-0.969976	11.3972	11.3972
mix_21689_12	1896.15	2639.65	3118.58	2189.71	K02111		K02086	70.4533	137.582	-0.965548	1.00434	1.00434
mix_21689_13	1474.37	2053.09	3215.88	2341.93	K02115		K01621	8605.6	16853.9	-0.969736	123.445	30
mix_21689_14	1798.78	2542.87	4000.07	3036.4	K02112		K03322	403.608	1461.16	-1.85608	17.3058	17.3058
mix_21689_3	203.513	283.336	394.633	289.924	K07104		K02970	1e-08	1e-08	0	0	0
mix_21689_5	90.3183	132.968	249.538	191.38	K02835		K09117	41.405	89.2833	-1.10859	0.724396	0.724396
mix_21689_6	112.547	156.708	258.027	214.878	K02493		K11189	323.627	844.742	-1.38418	8.08616	8.08616
mix_21689_8	1571.84	2227.66	2601.31	1957.71	K02108		K08483	143.885	247.998	-0.785414	1.53895	1.53895
mix_21689_9	277.277	427.817	671.205	546.906	K02110		K19002	67.0117	119.01	-0.828599	0.770686	0.770686
mix_21690_11	361.713	489.965	535.925	384.692	K01921		K13678	66.6217	122.002	-0.872838	0.823188	0.823188
mix_21690_12	2.10833	3.05156	1.70333	1.2535	K01246		K07027	31.3867	59.1483	-0.914186	0.413829	0.413829
mix_21690_3	180.955	251.07	361.527	251.175	K03569		K19005	320.888	562.278	-0.809213	3.57335	3.57335
mix_21690_6	110.367	156.674	207.938	137.927	K05837		K07024	897.848	1495.91	-0.736478	8.81475	8.81475
mix_21690_7	55.67	81.76	64.5567	42.5773	K02071		K01805	4.39333	3.49	0.332089	0.0130898	0.0130898
mix_21690_8	52.545	72.7779	75.91	53.1258	K02072		K08111	23.4383	15.97	0.553506	0.109064	0.109064
mix_21690_9	151.507	212.864	236.492	177.736	K02073		K09228	16.25	9.20333	0.820211	0.104386	0.104386
mix_21691_1	2321.28	3395.25	5009.12	3964.59	K02112		K18672	68.78	154.742	-1.1698	1.30738	1.30738
mix_21692_1	2860.52	4133.05	6309.76	4856.79	K02112		K00820	400.027	916.4	-1.19588	7.87145	7.87145
mix_21692_2	0	0	0	0	K02114		K09693	263.838	541.223	-1.03657	4.17251	4.17251
mix_2179_1	1.46	1.67207	0.488333	0.691337	K02358		K02760	150.133	343.195	-1.19278	2.94217	2.94217
mix_2184_1	1041.06	1552.7	3661.1	3665.73	K00036		K07258	385.943	743.78	-0.946487	5.34634	5.34634
mix_2184_2	95.3533	136.865	186.628	147.099	K00033		K00128	1e-08	2.67	-27.9923	0.373697	0.373697
mix_2184_4	0	0	0	0	K02028		K08659	1158.13	2645.91	-1.19197	22.6714	22.6714
mix_21900_2	0	0	0	0	K01689		K06306	2.96667	1e-08	28.1443	0.417473	0.417473
mix_2238_2	98.1383	135.62	139.798	97.2542	K06901		K07088	132.745	249.475	-0.910238	1.73956	1.73956
mix_2238_3	0	0	4.74	6.36991	K07090		K00432	151.56	291.157	-0.941907	2.08499	2.08499
mix_22410_1	31.0017	47.4357	79.9367	69.9537	K01955		K00016	109.917	112.805	-0.0374209	0.0416722	0.0416722
mix_2245_1	1.24167	2.77645	0	0	K02867		K03588	61.7083	96.7183	-0.648324	0.513559	0.513559
mix_22574_1	5410.25	7581.37	13584.8	9350.42	K00134		K00954	155.175	313.642	-1.01522	2.37976	2.37976
mix_22575_1	2010.33	2793.32	5686.74	3948.52	K00134		K07177	66.4	150.847	-1.18383	1.28591	1.28591
mix_22575_10	131.302	185.421	368.163	287.747	K06925		K16925	20.2	64.46	-1.67405	0.708625	0.708625
mix_22575_12	35.545	52.7099	72.48	54.6039	K02342		K06994	37.8933	110.79	-1.54781	1.15067	1.15067
mix_22575_13	100.493	154.669	279.898	233.402	K00075		K00014	2.97333	7.035	-1.24247	0.0621752	0.0621752
mix_22575_2	1156.34	1655.77	3481.78	2768.57	K00927		K00891	1.57333	2.335	-0.569598	0.0111309	0.0111309
mix_22575_3	413.267	593.695	933.682	762.318	K01803		K04517	1.63	1.72167	-0.0789339	0.0013228	0.0013228
mix_22575_4	192.388	273.903	406.843	308.525	K15580		K07316	3.19167	13.5317	-2.08396	0.174254	0.174254
mix_22575_5	498.857	690.232	1040.85	776.518	K03075		K01156	4.79333	20.51	-2.09723	0.265334	0.265334
mix_22575_6	252.867	353.943	560.62	393.391	K12573		K00783	82.4567	186.302	-1.17593	1.58021	1.58021
mix_22575_7	314.375	447.489	775.72	583.652	K03664		K00596	10.4767	0.46	4.5094	0.246589	0.246589
mix_22575_8	147.808	222.037	392.725	333.825	K03648		K07741	1e-08	1e-08	0	0	0
mix_22575_9	168.773	243.6	413.06	356.525	K00625		K04080	0.413333	1.50833	-1.86758	0.0179443	0.0179443
mix_22576_1	23754.1	33209.4	47471.4	42664.8	K00134		K02126	49.865	4.74333	3.39405	0.926718	0.926718
mix_22778_1	4173.9	5927.95	13456.3	11581.9	K00055		K03523	13.6233	48.9883	-1.84636	0.578018	0.578018
mix_22778_2	2360.59	3343.57	8043.37	7107.11	K00135		K00712	1225.91	2343.32	-0.934702	16.6808	16.6808
mix_22779_1	2300.08	3265.72	7120.1	6445.11	K00055		K00161	1.01167	0.745	0.441422	0.00387715	0.00387715
mix_22780_1	3066.91	4422.47	9025.28	8042.18	K00135		K07173	6.78	35.24	-2.37786	0.499588	0.499588
mix_22781_1	803.793	1129.34	2894.31	2273.4	K00055		K03709	160.782	218.302	-0.44122	0.836296	0.836296
mix_2329_2	287.892	414.008	687.203	591.924	K01875		K06345	2.21667	0.453333	2.28975	0.0305681	0.0305681
mix_2377_1	0	0	0	0	K03076		K03976	148.538	575.362	-1.95363	7.07118	7.07118
mix_2425_1	2.32667	2.83638	0.856667	1.34959	K03705		K06209	17.675	42.9467	-1.28084	0.388232	0.388232
mix_2449_1	2.66667	5.96285	1.05167	1.49399	K01689		K03883	14.145	0.811667	4.12326	0.308351	0.308351
mix_2451_2	19.3267	30.8554	49.7533	36.6376	K19158		K03884	1e-08	1e-08	0	0	0
mix_2452_6	127.075	181.536	421.44	389.076	K15051		K02503	323.612	1002.61	-1.63143	10.8182	10.8182
mix_24712_1	13.28	19.381	25.1467	22.6959	K07284		K07533	658.103	1200.36	-0.867085	8.05724	8.05724
mix_2484_1	2.21333	4.94916	1.13167	2.53048	K15771		K16899	50.9367	110.367	-1.11553	0.899692	0.899692
mix_2521_1	68.5383	94.2826	172.288	131.232	K03722		K16898	41.99	95.72	-1.18877	0.818531	0.818531
mix_2521_3	726.668	1029.18	1477.37	1029.24	K01893		K01834	2018.62	5953.68	-1.56041	62.2004	30
mix_2521_4	70.4533	105.979	137.582	95.1043	K02086		K07304	38.8917	50.2067	-0.368418	0.164127	0.164127
mix_26261_1	5197.19	7444.66	9608.74	6939.49	K01621		K02035	360.68	811.405	-1.1697	6.85496	6.85496
mix_26262_1	3405.51	4953.8	7233.16	5049.88	K01621		K00052	1.16167	0.615	0.917538	0.00815079	0.00815079
mix_26263_1	0	0	0	0	K01621		K03856	2.09167	7.97167	-1.93023	0.0971227	0.0971227
mix_2680_1	403.608	589.708	1460.18	1274.01	K03322		K00851	398.09	909.74	-1.19236	7.79702	7.79702
mix_2704_1	0	0	0	0	K02970		K09692	196.035	305.378	-0.639486	1.60324	1.60324
mix_2704_2	7.01667	11.0296	0.6	1.34164	K09117		K09809	23.5483	34.305	-0.542794	0.157012	0.157012
mix_2723_1	317.652	432.188	837.435	741.643	K11189		K11733	107.167	623.955	-2.54159	9.29104	9.29104
mix_2723_2	132.152	192.008	246.123	182.14	K08483		K07478	54.325	157.5	-1.53566	1.62646	1.62646
mix_2723_3	67.0117	96.0565	119.01	84.9038	K19002		K02956	207.09	423.907	-1.03349	3.26064	3.26064
mix_2723_4	66.6217	89.8662	122.002	82.8722	K13678		K12574	561.258	1159.32	-1.04655	9.00334	9.00334
mix_2723_5	31.3867	42.8959	59.1483	37.4898	K07027		K01869	142.427	256.385	-0.848093	1.69115	1.69115
mix_2723_6	184.207	253.64	303.678	208.459	K19005		K01304	94.8667	145.247	-0.614532	0.737787	0.737787
mix_27343_1	61.0733	82.6224	92.075	66.1513	K07024		K01420	1.43833	2.39667	-0.736631	0.0141249	0.0141249
mix_2803_1	0	0	0.98	2.19135	K03322		K00854	33.7867	166.742	-2.30309	2.30917	2.30917
mix_2821_1	1.06167	2.37396	1.13167	1.60616	K01805		K02863	1617.13	3240.57	-1.00281	24.3567	24.3567
mix_28895_1	23.4383	43.2592	15.97	23.6204	K08111		K00382	20.775	7.77	1.41886	0.202507	0.202507
mix_28901_1	16.25	25.5702	9.20333	14.4873	K09228		K16169	116.933	183.405	-0.649347	0.975119	0.975119
mix_29062_1	420.418	622.52	1083.06	837.351	K03697		K01182	157.5	981.082	-2.63902	15.0237	15.0237
mix_29071_1	68.78	99.5158	154.742	120.72	K18672		K00158	334.777	629.183	-0.910281	4.38737	4.38737
mix_29071_3	400.027	590.707	916.4	761.798	K00820		K01754	4.62167	0.395	3.54849	0.0890079	0.0890079
mix_29071_6	263.838	372.664	541.223	430.562	K09693		K02968	2545.48	8002.79	-1.65257	87.1585	30
mix_29071_7	150.133	223.551	343.195	270.357	K02760		K02340	62.07	99.8067	-0.68524	0.554622	0.554622
mix_29255_1	40.7517	59.9323	75.64	56.9927	K07258		K09936	19.9533	40.95	-1.03723	0.315855	0.315855
mix_29255_3	29.1667	43.0765	92.625	87.461	K01784		K15772	5.17	1e-08	28.9456	0.748243	0.748243
mix_29275_1	0	0	2.67	5.9703	K00128		K01681	3.53667	1e-08	28.3978	0.502168	0.502168
mix_29291_1	478.033	702.275	1348.46	1369.72	K08659		K03090	0.933333	1e-08	26.4759	0.123554	0.123554
mix_29313_2	0	0	0	0	K03687		K06881	411.69	769.763	-0.902857	5.33341	5.33341
mix_29366_1	2.96667	4.21124	0	0	K06306		K01838	9.21333	1e-08	29.7791	1.37183	1.37183
mix_29414_3	132.745	192.252	249.475	168.135	K07088		K00655	77.6767	122.038	-0.651781	0.650852	0.650852
mix_29414_4	151.56	219.098	291.157	204.999	K00432		K01239	312.4	532.577	-0.769595	3.25145	3.25145
mix_29420_2	89.7467	138.146	91.7267	91.74	K00016		K00691	4.71667	1.43833	1.71337	0.0527289	0.0527289
mix_29499_1	61.7083	88.5225	96.7183	66.5463	K03588		K03553	199.428	639.963	-1.68212	7.05978	7.05978
mix_29499_4	155.175	218.433	313.642	227.66	K00954		K03565	46.3633	118.49	-1.35371	1.11582	1.11582
mix_29499_5	66.4	93.9499	150.847	105.746	K07177		K00763	547.793	1380.99	-1.334	12.8649	12.8649
mix_29528_1	0.97	2.16899	0.745	1.66587	K03043		K05592	1e-08	1e-08	0	0	0
mix_29544_1	14.5667	20.6671	42.2317	31.8374	K16925		K03879	19.9133	1e-08	30.8911	3.07572	3.07572
mix_29544_2	31.055	42.5694	58.3767	44.8148	K16787		K01809	376.897	1463.75	-1.95743	18.0146	18.0146
mix_29544_3	21.465	32.8763	55.9267	39.7418	K16785		K01589	51.0633	142.812	-1.48375	1.43831	1.43831
mix_29556_1	37.8933	56.7597	110.79	105.547	K06994		K02435	335.69	1036	-1.62582	11.1506	11.1506
mix_29648_2	2.97333	4.10626	7.035	5.92164	K00014		K02433	233.378	699.335	-1.58331	7.38389	7.38389
mix_29648_3	1.57333	3.51808	2.335	2.02954	K00891		K02434	377.76	1031.44	-1.44912	10.2105	10.2105
mix_29648_4	1.63	2.53818	1.72167	1.63539	K04517		K07029	246.11	688.687	-1.48454	6.93874	6.93874
mix_29681_1	1.3	2.07034	6.15	4.87418	K07316		K03215	101.802	183.573	-0.850595	1.21369	1.21369
mix_29681_2	2.575	3.39143	16.165	11.0988	K01156		K01265	1070.65	2749.99	-1.36094	25.9983	25.9983
mix_29686_2	22.3783	32.5078	48.9533	49.4919	K06180		K13531	90.745	248.668	-1.45433	2.4681	2.4681
mix_29717_5	82.4567	113.561	186.302	168.473	K00783		K07009	131.843	255.697	-0.955609	1.85168	1.85168
mix_29749_1	10.4767	7.46787	0.46	0.422256	K00596		K00937	197.24	454.433	-1.20412	3.92345	3.92345
mix_2977_2	0	0	0	0	K07741		K07038	60.0033	48.91	0.294913	0.1606	0.1606
mix_29801_1	2.98167	4.76805	1.35833	3.03733	K00627		K03293	92.6717	205.155	-1.14651	1.70731	1.70731
mix_29813_1	0.413333	0.924241	1.50833	3.37274	K04080		K07003	122.892	329.35	-1.42223	3.21597	3.21597
mix_29824_1	49.865	104.051	4.74333	4.34818	K02126		K03703	103.118	147.3	-0.514457	0.644147	0.644147
mix_29851_1	13.6233	22.4854	48.9883	56.528	K03523		K01695	1e-08	3.99	-28.5718	0.570008	0.570008
mix_29884_1	0	0	1.57667	3.52553	K00712		K01533	37.5083	102.145	-1.44534	1.00923	1.00923
mix_29893_3	124.568	175.721	174.847	128.533	K06216		K07448	22.6967	124.017	-2.44998	1.79722	1.79722
mix_29932_1	1.01167	2.26216	0.745	1.66587	K00161		K00027	218.49	618.833	-1.50198	6.28823	6.28823
mix_30086_1	9.43333	13.6657	20.0567	21.9627	K05946		K03781	114.66	342.565	-1.57902	3.60983	3.60983
mix_30181_2	4.14167	6.38322	23.0483	23.2998	K07173		K02237	7.455	56.79	-2.92936	0.940983	0.940983
mix_30231_1	160.782	221.196	218.302	142.816	K03709		K01493	56.4867	194.422	-1.78321	2.23711	2.23711
mix_30232_1	2.08833	2.71133	0.608333	1.36027	K09014		K02238	27.625	56.195	-1.02447	0.429354	0.429354
mix_30326_1	0	0	8.05	14.9411	K02114		K06889	1508.08	3921.44	-1.37867	37.4276	30
mix_30430_1	2.21667	3.13518	0.453333	1.01368	K06345		K18682	889.317	1572.95	-0.822704	10.1286	10.1286
mix_30464_1	6.50833	7.24438	0	0	K04077		K03878	30.3667	0.635	5.57959	0.864883	0.864883
mix_30468_1	148.538	223.28	575.362	501.18	K03976		K01193	334.757	432.46	-0.369454	1.41726	1.41726
mix_30468_2	7.94333	12.2403	18.5567	17.5341	K06950		K07560	176.023	168.81	0.0603663	0.104082	0.104082
mix_30503_1	316.287	494.325	636.253	458.417	K07258		K06158	32.4167	121.005	-1.90026	1.4577	1.4577
mix_30503_2	17.675	22.3636	42.9467	42.2562	K06209		K10009	295.397	534.823	-0.856409	3.55504	3.55504
mix_30513_10	6.76333	12.9573	0.811667	1.41563	K03883		K09773	86.215	160.395	-0.895618	1.10434	1.10434
mix_30513_4	0	0	0	0	K03884		K03299	73.77	117.16	-0.667374	0.637109	0.637109
mix_30513_9	7.38167	15.5813	0	0	K03883		K07736	3.38833	0.596667	2.50558	0.0499237	0.0499237
mix_30523_1	323.612	447.112	1002.61	897.841	K02503		K03652	224.385	417.182	-0.8947	2.87005	2.87005
mix_30523_3	656.035	938.848	1200.36	922.935	K07533		K01281	47.1133	104.213	-1.14533	0.866597	0.866597
mix_30560_1	132.487	186.711	275.845	237.064	K00384		K08651	1.85	0.856667	1.11072	0.0150317	0.0150317
mix_30607_5	50.9367	74.0064	110.367	81.6001	K16899		K00925	1e-08	0.396667	-25.2414	0.0500622	0.0500622
mix_30607_6	41.99	59.196	95.72	65.8971	K16898		K19157	3.02167	1.675	0.851183	0.0199886	0.0199886
mix_30642_1	1.14	1.40735	0.473333	0.70092	K02358		K07473	1e-08	1e-08	0	0	0
mix_30658_3	1897.54	2656.23	5666.77	3885.84	K01834		K10254	3.68167	0.453333	3.02171	0.062474	0.062474
mix_30696_1	38.8917	64.8277	50.2067	48.9948	K07304		K02261	1e-08	7.58333	-29.4983	1.11848	1.11848
mix_30718_3	9.65333	11.8734	13.81	9.04889	K02035		K17734	4.01833	4.685	-0.221452	0.00963684	0.00963684
mix_30736_1	1.16167	2.59757	0.615	1.37518	K00052		K01358	1385.21	3331.26	-1.26596	29.8543	29.8543
mix_30769_1	0.156667	0.350317	1.16833	1.89744	K03856		K01883	2033.78	4002.55	-0.976754	29.48	29.48
mix_30778_1	398.09	589.425	909.74	721.439	K00851		K02001	1e-08	0.5	-25.5754	0.0639386	0.0639386
mix_30780_2	196.035	283.394	305.378	215.563	K09692		K00383	941.24	1619.93	-0.783298	10.0308	10.0308
mix_30780_3	23.5483	33.3545	34.305	23.8835	K09809		K05808	1.395	1.585	-0.184218	0.00274484	0.00274484
mix_30820_1	107.167	151.076	623.955	580.46	K11733		K03671	655.97	1235.82	-0.913761	8.6432	8.6432
mix_30820_2	23.44	32.2441	66.3417	63.1361	K07478		K07305	348.158	295.837	0.234943	0.75651	0.75651
mix_30820_3	30.0017	43.9138	100.873	101.122	K08659		K01153	16.4217	47.7983	-1.54136	0.494931	0.494931
mix_30820_4	5.63333	11.6362	22.2283	24.5317	K16925		K03427	12.3517	36.7983	-1.57493	0.38704	0.38704
mix_30821_1	207.09	291.629	423.907	288.046	K02956		K06910	527.862	1920.36	-1.86315	22.807	22.807
mix_30821_2	244.103	345.987	489.13	350.808	K12574		K03320	22.81	43.915	-0.945047	0.315291	0.315291
mix_30895_1	0	0	0.241667	0.342365	K07316		K03700	171.833	244.82	-0.510711	1.06395	1.06395
mix_30925_2	74.095	106.928	197.808	155.922	K06216		K05366	208.2	274.375	-0.398179	0.960756	0.960756
mix_30947_2	142.427	203.843	256.385	191.75	K01869		K03282	308.487	359.37	-0.220262	0.735517	0.735517
mix_30947_3	184.887	264.983	341.977	245.972	K08659		K01972	62.7433	169.937	-1.43746	1.67234	1.67234
mix_30970_3	23.5917	33.9084	29.4533	30.1325	K01304		K03704	38.4117	61.0967	-0.669549	0.333129	0.333129
mix_30976_3	1.43833	2.05027	2.39667	2.5519	K01420		K05910	82.38	137.632	-0.740446	0.814534	0.814534
mix_31002_4	13.6433	21.7051	85.095	99.6773	K00854		K01515	83.5483	390.48	-2.22457	5.27254	5.27254
mix_31002_5	20.1433	28.4455	81.6467	81.4076	K00854		K01104	733.455	1087.3	-0.567967	5.17064	5.17064
mix_31073_1	2.21167	3.17802	13.7667	17.3405	K00611		K08161	176.493	625.342	-1.82503	7.31687	7.31687
mix_31073_2	3.23333	4.64452	16.5783	20.0886	K01478		K03309	62.8517	101.423	-0.690367	0.56705	0.56705
mix_31091_1	0	0	4.78833	10.707	K02863		K00823	96.8567	233.943	-1.27224	2.10428	2.10428
mix_31154_1	2.29833	4.48193	0.316667	0.496174	K00382		K00980	416.712	989.132	-1.24711	8.76623	8.76623
mix_31158_1	116.933	166.594	183.405	127.537	K16169		K02837	114.603	256.742	-1.16367	2.16061	2.16061
mix_31251_1	0	0	0	0	K04077		K01791	102.245	209.59	-1.03554	1.61459	1.61459
mix_31262_1	0.421667	0.942875	4.33	6.10058	K03111		K07058	132.102	213.525	-0.692756	1.19718	1.19718
mix_31306_1	2	4.47214	0	0	K01182		K02795	11.1283	1e-08	30.0516	1.67212	1.67212
mix_31329_1	64.2367	101.376	80.2433	77.0015	K00158		K02796	4.11333	0.511667	3.00703	0.0695376	0.0695376
mix_31347_1	4.62167	3.861	0.395	0.345193	K01754		K11073	1.075	1e-08	26.6798	0.143404	0.143404
mix_31399_1	2545.48	3964.3	8002.79	5925.99	K02968		K13919	2.47833	1e-08	27.8848	0.345539	0.345539
mix_31399_2	7.35833	16.4537	4.35	9.7269	K02340		K02897	0.868333	2.295	-1.40217	0.0221777	0.0221777
mix_31491_1	3.85667	6.42742	1.23833	2.769	K00016		K00951	146.888	270.895	-0.883014	1.84454	1.84454
mix_31527_1	117.44	167.076	286.077	237.461	K01834		K02440	19.3517	60.3033	-1.63978	0.653083	0.653083
mix_31543_2	19.9533	28.0853	40.95	31.6513	K09936		K06147	163.722	326.327	-0.995072	2.43817	2.43817
mix_31735_1	5.17	7.68869	0	0	K15772		K00077	152.222	336.543	-1.14462	2.79725	2.79725
mix_31765_1	1.37167	2.18055	1.73167	2.22917	K01929		K04564	12.0733	5.25833	1.19915	0.103916	0.103916
mix_31930_1	313.738	455.039	717.328	545.88	K01462		K11068	26.7083	58.795	-1.1384	0.486686	0.486686
mix_31954_1	3.53667	5.17785	0	0	K01681		K00865	31.4983	72.8683	-1.21002	0.631427	0.631427
mix_31996_2	0	0	0	0	K02876		K07078	518.282	875.272	-0.755995	5.26759	5.26759
mix_32007_1	0.933333	2.087	0	0	K03090		K01207	91.35	159.223	-0.801575	1.00427	1.00427
mix_32024_1	0	0	0.753333	1.6845	K02990		K02248	0.195	2.71333	-3.79852	0.0552368	0.0552368
mix_32086_1	0	0	2.14	2.45569	K02863		K02246	1.645	2.43667	-0.566821	0.0115679	0.0115679
mix_32142_1	2.40167	5.37029	2.225	3.25982	K00927		K02245	1e-08	0.9	-26.4234	0.118905	0.118905
mix_32159_1	44.285	99.0243	66.255	59.2314	K06881		K02244	0.945	1.71167	-0.857016	0.011384	0.011384
mix_32170_1	9.21333	20.6016	0	0	K01838		K02243	0.966667	3.465	-1.84176	0.0408104	0.0408104
mix_32180_1	77.6767	114.95	122.038	98.26	K00655		K15634	1080.32	1708.29	-0.661088	9.21759	9.21759
mix_321_1	312.4	437.553	532.577	377.037	K01239		K17759	606.523	2586.44	-2.09233	33.4036	30
mix_32283_1	0	0	2.115	4.72928	K00873		K00864	123.91	160.205	-0.370627	0.526503	0.526503
mix_3231_2	11.9417	15.594	19.4267	14.4345	K02030		K01807	201.357	401.758	-0.996575	3.00525	3.00525
mix_32333_1	2	4.47214	0	0	K00691		K01372	365.84	694.123	-0.923979	4.89692	4.89692
mix_32498_1	149.708	228.728	467.455	385.307	K03553		K05520	1617.13	5786.12	-1.83916	68.0788	30
mix_32498_2	46.3633	69.3749	118.49	96.0728	K03565		K00571	237.033	516.1	-1.12256	4.22719	4.22719
mix_32500_1	2.62667	3.89692	4.39167	4.65506	K00763		K01101	303.388	490.643	-0.693509	2.75334	2.75334
mix_32502_1	0	0	0	0	K05592		K11050	14.0733	48.9883	-1.79947	0.567389	0.567389
mix_32520_1	0	0	1.58167	3.53671	K09015		K02239	2.03167	1e-08	27.5981	0.280351	0.280351
mix_32527_1	0	0	3.15333	7.05107	K02342		K00294	0.621667	0.656667	-0.07902	0.000505069	0.000505069
mix_32561_1	3.33167	5.03303	2.35833	4.27243	K01805		K03756	61.4267	105.853	-0.78513	0.656682	0.656682
mix_32568_1	19.9133	44.5276	0	0	K03879		K03666	1e-08	1e-08	0	0	0
mix_32574_1	376.897	542.823	1463.75	1691.51	K01809		K01119	171.645	342.648	-0.997301	2.56453	2.56453
mix_32583_2	51.0633	74.9944	142.812	107.827	K01589		K16509	1362.34	1753.47	-0.364128	5.67276	5.67276
mix_32583_3	101.75	149.246	292.82	261.853	K03657		K01232	1e-08	1e-08	0	0	0
mix_32583_5	335.69	492.215	1036	898.23	K02435		K00948	454.105	957.85	-1.07677	7.60178	7.60178
mix_32583_6	233.378	346.069	699.335	519.654	K02433		K04069	1e-08	1.38333	-27.0436	0.187051	0.187051
mix_32583_7	377.76	547.738	1031.44	775.159	K02434		K07482	3.82	8.8	-1.20393	0.075968	0.075968
mix_32583_8	246.11	367.747	688.687	497.583	K07029		K19267	23.59	44.6767	-0.921346	0.314486	0.314486
mix_32583_9	101.802	142.368	183.573	127.812	K03215		K03665	187.462	251.848	-0.42596	0.935641	0.935641
mix_32600_1	1070.65	1561.77	2749.99	2431.09	K01265		K00869	92.545	189.515	-1.03409	1.45837	1.45837
mix_32606_3	90.745	134.153	248.668	223.175	K13531		K01597	16.9433	40.2017	-1.24654	0.356167	0.356167
mix_32606_4	93.3217	131.951	197.662	175.172	K15051		K00938	53.42	103.303	-0.951435	0.74556	0.74556
mix_32606_8	292.543	420.763	434.043	345.018	K01928		K01823	23.6083	46.3467	-0.973169	0.34039	0.34039
mix_32606_9	131.843	189.069	255.697	196.684	K07009		K12952	45.1417	136.107	-1.59221	1.44292	1.44292
mix_32653_1	270.54	390.239	548.94	469.95	K00158		K03294	566.683	521.175	0.120775	0.65693	0.65693
mix_32675_1	17.8617	26.0838	32.07	36.1599	K00937		K01635	1e-08	0.785	-26.2262	0.102938	0.102938
mix_32722_2	203.498	341.949	913.103	821.114	K02424		K07010	157.585	371.17	-1.23595	3.26757	3.26757
mix_32722_3	147.385	219.162	184.645	134.551	K07090		K02348	86.5867	304.102	-1.81234	3.54029	3.54029
mix_32743_1	4.77333	7.05313	35.315	45.7332	K12410		K07386	449.345	743.752	-0.726997	4.33689	4.33689
mix_32750_1	60.0033	83.3322	48.91	34.3297	K07038		K01271	46.1833	149.005	-1.68992	1.64926	1.64926
mix_32750_3	67.28	96.4515	123.598	88.2088	K03293		K09825	140.662	352.308	-1.32461	3.26496	3.26496
mix_32755_2	122.892	175.195	329.35	315.239	K07003		K13953	578.023	2085.8	-1.8514	24.6591	24.6591
mix_32781_1	2.61333	5.12509	4.90333	4.21834	K02035		K09772	526.21	1368.37	-1.37875	13.0607	13.0607
mix_32804_1	1.89167	4.2299	7.14	5.46574	K07316		K03713	286.203	512.292	-0.839925	3.35338	3.35338
mix_32822_2	103.118	146.468	147.3	124.462	K03703		K03435	578.295	926.265	-0.679619	5.11264	5.11264
mix_32866_1	0	0	0	0	K02965		K07152	1e-08	1.78667	-27.4127	0.244887	0.244887
mix_32866_2	0	0	0	0	K02890		K09685	220.88	394.268	-0.835915	2.57106	2.57106
mix_32888_1	0	0	3.99	8.92191	K01695		K01623	1.04167	0.65	0.680382	0.0057549	0.0057549
mix_32896_1	0.186667	0.306576	2.93667	4.56878	K00134		K00005	112.9	151.287	-0.422239	0.55775	0.55775
mix_32990_2	37.5083	53.047	102.145	82.4959	K01533		K01643	1e-08	1e-08	0	0	0
mix_33031_3	2.78667	3.97658	5.00667	4.25871	K07448		K02959	857.823	1955.52	-1.1888	16.7224	16.7224
mix_33031_4	218.49	320.418	618.833	509.805	K00027		K06960	301.607	736.052	-1.28714	6.67805	6.67805
mix_33059_1	112.842	168.686	340.005	334.391	K03781		K00941	80.225	178.913	-1.15714	1.49929	1.49929
mix_33081_2	292.445	422.693	456.805	342.615	K07090		K03469	44.3283	85.5467	-0.948483	0.615921	0.615921
mix_33082_1	7.455	10.8945	56.79	67.8915	K02237		K00661	383.573	742.51	-0.952908	5.36527	5.36527
mix_33082_2	56.4867	88.5447	194.422	190.537	K01493		K03451	246.855	435.697	-0.81966	2.7973	2.7973
mix_33082_3	27.625	38.9658	56.195	49.5293	K02238		K06207	1041.73	2088.09	-1.0032	15.6991	15.6991
mix_33082_4	54.7117	74.0686	95.4567	74.7934	K02340		K00244	1.65833	3.97833	-1.26243	0.0355795	0.0355795
mix_33103_2	33.09	48.5601	78.9683	56.8251	K06889		K06967	32.4133	119.158	-1.87822	1.42343	1.42343
mix_33103_4	220.187	306.941	479.753	373.409	K18682		K03695	74.5667	268.472	-1.84817	3.16996	3.16996
mix_33146_3	0	0	0	0	K03878		K06217	271.047	331.47	-0.290337	0.874665	0.874665
mix_33151_3	334.757	462.577	432.46	309.395	K01193		K07042	199.217	290.103	-0.542229	1.32662	1.32662
mix_33210_1	11.5133	13.335	1.57167	3.51435	K02355		K00887	125.562	221.472	-0.818726	1.42063	1.42063
mix_3322_1	3.575	7.99394	1.69167	2.8106	K13993		K03595	193.635	290.557	-0.58548	1.41742	1.41742
mix_33237_1	1.71333	2.93868	3.27167	2.70854	K00841		K03584	210.995	315.625	-0.581003	1.52984	1.52984
mix_33240_2	176.023	242.593	168.81	120.815	K07560		K01878	132.425	257.865	-0.96144	1.8762	1.8762
mix_33284_2	32.4167	49.8425	121.005	118.178	K06158		K01879	112.838	216.725	-0.941608	1.5516	1.5516
mix_33287_4	296.697	422.439	951.185	885.514	K00876		K02316	102.843	157.918	-0.61873	0.806706	0.806706
mix_33326_1	56.7467	78.4564	81.6917	68.4308	K08659		K15770	7.25167	2.505	1.5335	0.0748093	0.0748093
mix_3335_2	295.397	411.681	534.823	390.21	K10009		K06131	153.363	213.177	-0.475096	0.870708	0.870708
mix_3335_3	514.92	727.584	851.805	616.347	K01992		K02077	140.858	153.978	-0.128482	0.189407	0.189407
mix_33377_2	86.215	117.985	160.395	107.829	K09773		K02074	136.775	167.757	-0.294566	0.448523	0.448523
mix_33411_1	51.7183	74.8193	38.0217	27.6236	K03299		K02075	44.8583	79.3133	-0.822187	0.510462	0.510462
mix_33477_1	3.38833	2.79524	0.596667	1.33419	K07736		K00600	44.2867	87.27	-0.978613	0.643716	0.643716
mix_33548_1	2.06833	4.62493	0	0	K07533		K01491	150.995	388.548	-1.36359	3.67859	3.67859
mix_33617_1	107.525	149.7	195.003	146.929	K03652		K01091	19.005	36.6533	-0.947565	0.2637	0.2637
mix_33699_1	0	0	0.885	1.28641	K00134		K01520	53.4683	160.22	-1.5833	1.69166	1.69166
mix_33705_1	247.505	368.672	512.468	525.018	K07024		K02601	275.912	767.227	-1.47545	7.69547	7.69547
mix_33789_2	1.78333	2.97097	0.165	0.368951	K02986		K02864	3496.1	6577.78	-0.911857	45.9297	30
mix_3378_1	5.39167	7.44583	11.5617	11.4841	K01281		K02935	3441.37	6219.41	-0.853796	41.2417	30
mix_33826_1	1.85	1.7857	0.856667	1.28074	K08651		K14205	74.165	153.097	-1.04563	1.18816	1.18816
mix_33847_1	1.245	2.35208	4.43333	6.71365	K01621		K04485	33.0183	93.0117	-1.49414	0.941535	0.941535
mix_33871_1	0	0	0.396667	0.886974	K00925		K09698	564.777	1169.04	-1.04958	9.09888	9.09888
mix_33892_1	0	0	0	0	K19157		K11145	223.233	519.928	-1.21976	4.5324	4.5324
mix_33892_2	0	0	0	0	K07473		K03218	63.5717	146.373	-1.2032	1.26303	1.26303
mix_33926_1	1.22	1.72569	0.453333	1.01368	K10254		K06962	115.757	222.693	-0.943963	1.59742	1.59742
mix_34032_2	0	0	7.58333	16.9568	K02261		K03091	31.5383	74.4667	-1.23949	0.65696	0.65696
mix_34066_1	1.945	4.34915	0.86	1.25001	K04086		K02794	3.335	0.251667	3.7281	0.0668573	0.0668573
mix_3408_1	0.61	1.364	1.46	2.18916	K00134		K06342	10.7583	5.35167	1.00739	0.0811456	0.0811456
mix_34247_1	1.72667	3.86094	0.736667	1.64724	K00691		K03549	225.118	288.26	-0.356687	0.915577	0.915577
mix_34252_1	2.10167	3.20241	0.968333	1.56301	K17734		K08720	1.655	1.79833	-0.119829	0.00206905	0.00206905
mix_34283_1	1382.97	1974.14	3330.44	2441.35	K01358		K01963	94.7117	216.653	-1.19377	1.8585	1.8585
mix_34293_1	1.89667	2.68351	0	0	K01883		K01962	212.112	441.412	-1.0573	3.45485	3.45485
mix_34296_1	6.90333	9.79572	14.5917	15.8646	K07491		K00208	130.033	283.205	-1.12297	2.32026	2.32026
mix_34323_1	0	0	0.5	1.11803	K02001		K06133	330.012	699.52	-1.08385	5.57928	5.57928
mix_34354_1	0	0	2.46	5.50073	K04043		K03524	120.807	284.437	-1.23541	2.5032	2.5032
mix_34412_1	7.92	17.7097	0	0	K02886		K02372	450.122	1148.59	-1.35147	10.803	10.803
mix_3446_1	0	0	0	0	K01621		K09458	409.775	1109.65	-1.43721	10.9187	10.9187
mix_34502_1	1.44	2.05933	0	0	K09015		K01938	458.405	1268.72	-1.46868	12.6829	12.6829
mix_34584_1	3.58833	8.02376	7.85167	13.2479	K13993		K00648	231.73	642.227	-1.47064	6.42637	6.42637
mix_34619_2	0	0	0	0	K02126		K02078	1541.93	4793.92	-1.63647	51.8422	30
mix_34636_1	0	0	2.515	2.86548	K00134		K00645	442.253	1191.83	-1.43024	11.6856	11.6856
mix_34683_1	1.33333	2.20507	1.95	2.79241	K13993		K00059	270.418	718.035	-1.40886	6.96297	6.96297
mix_34693_1	34.2267	51.3742	86.03	81.2549	K07090		K02160	261.935	553.995	-1.08066	4.40873	4.40873
mix_34693_2	85.4117	121.022	228.067	194.131	K07090		K01961	314.515	727.28	-1.20938	6.29964	6.29964
mix_34693_3	363.445	509.103	817.587	698.341	K00383		K02050	7.61667	86.6767	-3.50841	1.6541	1.6541
mix_34771_4	71.275	96.7131	115.793	89.0998	K01304		K04066	34.0017	102.887	-1.59738	1.09331	1.09331
mix_34777_1	1.395	2.2903	1.585	3.54417	K05808		K00604	123.062	284.065	-1.20684	2.45668	2.45668
mix_34786_1	4.67833	7.95334	0.576667	0.818467	K03111		K03500	84.98	186.425	-1.1334	1.53805	1.53805
mix_34810_2	16.2333	25.7322	45.6917	42.8738	K06216		K06949	200.862	404.908	-1.01139	3.06336	3.06336
mix_3482_1	0	0	0	0	K02992		K01783	234.958	555.512	-1.24141	4.9065	4.9065
mix_3482_2	0.858333	0.877713	1.89	1.91303	K02355		K00949	147.942	354.092	-1.25909	3.16054	3.16054
mix_34837_1	317.008	509.993	262.825	191.09	K03671		K03601	103.458	267.73	-1.37173	2.54585	2.54585
mix_34837_2	348.158	533.934	295.837	209.7	K07305		K03602	182.65	587.93	-1.68656	6.49816	6.49816
mix_34868_1	2.545	5.69079	2.145	4.79637	K04086		K13789	59.745	146.283	-1.29188	1.33081	1.33081
mix_34915_1	2.245	1.62976	0.823333	0.943092	K01358		K06442	92.055	219.658	-1.25469	1.95552	1.95552
mix_34920_2	300.43	462.587	624.888	656.646	K03647		K03631	64.1133	168.7	-1.39576	1.62476	1.62476
mix_34993_1	2.21833	3.17402	4.345	3.81231	K01156		K00942	601.405	1156.77	-0.943693	8.29589	8.29589
mix_34993_2	16.4217	23.1717	47.7983	38.5537	K01153		K03060	821.89	2524.56	-1.61902	27.0898	27.0898
mix_34993_3	12.3517	18.1181	36.7983	30.8083	K03427		K13038	37.32	78.62	-1.07495	0.623147	0.623147
mix_35032_1	2.64167	5.90695	0.388333	0.86834	K15580		K01835	207.743	367.137	-0.821515	2.36136	2.36136
mix_35036_1	527.862	770.941	1920.36	1755.31	K06910		K09384	32.3033	117.133	-1.8584	1.38856	1.38856
mix_35050_1	22.81	30.7843	43.915	41.8619	K03320		K02821	1e-08	2.11	-27.6527	0.291736	0.291736
mix_35062_3	13.0033	17.3004	12.6183	8.97025	K08659		K07668	200.893	426.112	-1.0848	3.40088	3.40088
mix_35066_1	0.226667	0.506842	1.41	2.09627	K13993		K07652	203.255	314.185	-0.628323	1.6256	1.6256
mix_35116_1	0	0	1.015	2.26961	K02950		K04771	81.8917	177.583	-1.11671	1.44879	1.44879
mix_3511_2	171.833	249.835	244.82	170.481	K03700		K01867	181.432	251.703	-0.472298	1.02284	1.02284
mix_3511_3	208.2	294.937	274.375	199.812	K05366		K01524	202.133	334.527	-0.726814	1.95026	1.95026
mix_35122_2	49.4467	68.4656	40.4367	41.9646	K03778		K01874	423.618	848.357	-1.00191	6.372	6.372
mix_3513_2	114.353	164.233	195.632	145.263	K06216		K03424	146.537	215.107	-0.553791	1.00137	1.00137
mix_35171_1	308.487	450.496	359.37	327.671	K03282		K02528	139.695	229.84	-0.71835	1.32728	1.32728
mix_35198_1	62.7433	92.5538	169.937	137.39	K01972		K04042	1027.33	2602.1	-1.34078	24.3312	24.3312
mix_35256_1	0	0	0	0	K03704		K07507	287.528	569.078	-0.984923	4.21846	4.21846
mix_35310_1	80.9667	123.343	130.13	103.293	K05910		K07170	66.3067	127.73	-0.945872	0.917669	0.917669
mix_35337_3	83.5483	124.731	390.48	384.784	K01515		K01776	182.672	413.922	-1.1801	3.52021	3.52021
mix_35339_2	51.5733	71.5167	165.603	189.295	K01104		K01586	30.195	158.038	-2.38789	2.24741	2.24741
mix_35350_1	187.675	268.97	329.695	274.322	K08659		K05822	17.9333	159.58	-3.15356	2.799	2.799
mix_35357_1	0	0	0	0	K01156		K05823	51.4967	244.102	-2.24493	3.31799	3.31799
mix_35366_1	0	0	1.6	2.65935	K03046		K01714	115.07	411.378	-1.83795	4.83794	4.83794
mix_35376_1	103.513	156.067	438.678	513.536	K08161		K00215	71.4433	209.02	-1.54877	2.17187	2.17187
mix_35392_1	22.0517	27.9861	79.1383	64.6152	K03299		K00133	109.887	317.507	-1.53077	3.27121	3.27121
mix_35440_1	62.8517	91.5795	101.423	73.0217	K03309		K00928	89.275	264.428	-1.56655	2.77047	2.77047
mix_35474_1	0	0	0	0	K02519		K01778	52.4067	182.095	-1.79687	2.10684	2.10684
mix_35529_1	1.54	3.44354	1.37167	3.06714	K01689		K07107	117.098	206.457	-0.818118	1.32353	1.32353
mix_35538_1	0	0	0	0	K09014		K00656	19.5967	3.92	2.32168	0.272991	0.272991
mix_35564_1	1.91667	1.95036	3.71667	4.10222	K17734		K00926	1986.48	4924.98	-1.3099	45.2667	30
mix_35598_2	96.8567	134.168	233.943	212.237	K00823		K01595	78.765	135.957	-0.78752	0.845488	0.845488
mix_35649_1	0	0	1.51667	3.39137	K02986		K02356	176.687	379.378	-1.10244	3.06515	3.06515
mix_35662_1	2.93167	6.55541	0	0	K03778		K03106	256.542	552.483	-1.10674	4.47689	4.47689
mix_35695_1	2.46167	5.50445	0	0	K10254		K02860	109.832	199.653	-0.862203	1.33419	1.33419
mix_3570_1	416.712	577.705	989.132	903.954	K00980		K00554	86.5083	173.538	-1.00434	1.30588	1.30588
mix_3570_2	114.603	165.044	256.742	182.121	K02837		K02884	1164.62	3411.2	-1.55043	35.4723	30
mix_3570_3	174.315	238.957	338.527	241.4	K08659		K07030	183.377	356.973	-0.961006	2.5964	2.5964
mix_3571_2	102.245	151.343	209.59	184.26	K01791		K03823	91.1717	270.81	-1.57062	2.84268	2.84268
mix_3571_3	132.102	194.075	213.525	161.476	K07058		K03655	97.4017	210.877	-1.11438	1.7177	1.7177
mix_35779_1	10.81	15.4017	8.19167	9.0558	K07090		K03621	76.9917	181.783	-1.23945	1.60369	1.60369
mix_35814_3	247.768	357.439	422.083	374.015	K03217		K03685	65.8567	247.905	-1.91239	3.00017	3.00017
mix_358_1	11.1283	19.8965	0	0	K02795		K03529	47.7383	168.92	-1.82312	1.97497	1.97497
mix_358_2	4.11333	7.44179	0.511667	1.14412	K02796		K03110	123.968	310.237	-1.3234	2.87313	2.87313
mix_35999_1	0	0	1.88167	2.21086	K01621		K09787	31.6633	64.7617	-1.03233	0.497711	0.497711
mix_36080_1	1.31667	2.94416	0	0	K00382		K03048	3287.26	6235.51	-0.923623	43.9773	30
mix_36106_1	1.075	2.40377	0	0	K11073		K01937	179.692	435.26	-1.27635	3.92448	3.92448
mix_36156_1	204.318	322.141	839.062	857.956	K06216		K00790	428.915	946.767	-1.14232	7.85732	7.85732
mix_3616_1	10.595	14.8881	35.4417	36.242	K06889		K02909	13178.7	34803.3	-1.40101	336.116	30
mix_36218_1	0	0	2.45833	3.99963	K01810		K03545	902.165	1773.87	-0.97544	13.0516	13.0516
mix_36316_1	0	0	0	0	K02355		K09976	128.247	420.748	-1.71404	4.70499	4.70499
mix_36322_1	1.71833	3.84231	0	0	K00826		K03544	597.592	1206.26	-1.0133	9.13924	9.13924
mix_36356_1	1.81833	4.06592	2.56	5.72433	K03781		K03978	173.357	325.577	-0.909254	2.26829	2.26829
mix_36381_1	0.88	1.96774	0.973333	2.17644	K02111		K03979	257.383	627.843	-1.28649	5.69416	5.69416
mix_36530_1	0	0	2.92333	5.05227	K01621		K00784	121.697	266.108	-1.12872	2.18862	2.18862
mix_36587_1	2.47833	5.54172	0	0	K13919		K07462	73.7483	173.788	-1.23665	1.53058	1.53058
mix_36671_1	0.868333	1.94165	2.295	5.13178	K02897		K00759	169.542	436.592	-1.36464	4.13578	4.13578
mix_36702_1	0.99	2.21371	0.701667	1.0236	K00691		K02509	5.45167	1e-08	29.0221	0.791095	0.791095
mix_36702_2	0	0	0	0	K01838		K02031	40.8117	57.0417	-0.483035	0.236333	0.236333
mix_36746_1	5.885	9.8903	0.635	1.4199	K03386		K02033	25.7783	40.865	-0.664707	0.221491	0.221491
mix_36757_1	0.88	1.96774	0.59	1.31928	K15580		K02034	29.3267	47.3817	-0.692116	0.265455	0.265455
mix_36816_1	6.87667	15.3767	0	0	K01182		K01303	8.65833	22.0067	-1.34578	0.206342	0.206342
mix_36884_1	146.888	214.881	270.895	202.306	K00951		K01259	440.76	968.95	-1.13643	8.01018	8.01018
mix_36907_2	19.3517	28.6259	60.3033	66.3298	K02440		K07559	48.22	110.512	-1.1965	0.949608	0.949608
mix_36957_1	30.3667	55.1974	0.635	1.4199	K03878		K01126	680.983	2699.07	-1.98677	33.5769	30
mix_36965_1	80.2033	111.044	138.94	96.5399	K06147		K07816	220.352	365.413	-0.729721	2.13723	2.13723
mix_36965_2	83.5183	120.67	187.387	131.984	K06147		K01925	138.425	348.535	-1.3322	3.24364	3.24364
mix_36966_2	116.86	165.288	222.178	173.25	K03652		K02563	107.607	258.57	-1.26479	2.31568	2.31568
mix_37005_1	0	0	1.295	2.89571	K03046		K03589	37.0083	72.7067	-0.974237	0.534442	0.534442
mix_37007_1	0.448333	1.0025	1.59167	2.25377	K00382		K03531	383.24	779.798	-1.02485	5.95972	5.95972
mix_37009_2	152.222	209.605	336.543	275.805	K00077		K02221	92.0917	210.068	-1.18972	1.79742	1.79742
mix_37086_1	1.09	2.43731	0	0	K04564		K04074	348.012	752.025	-1.11164	6.11425	6.11425
mix_37094_1	26.7083	39.2318	58.795	44.3271	K11068		K01870	103.058	229.838	-1.15716	1.92607	1.92607
mix_37094_3	31.4983	44.2312	72.8683	62.3043	K00865		K00858	121.715	227.75	-0.903944	1.57948	1.57948
mix_37094_4	518.282	731.691	875.272	644.541	K07078		K01243	181.742	364.312	-1.00328	2.73923	2.73923
mix_37105_1	91.35	136.156	159.223	163.154	K01207		K04487	415.16	987.552	-1.25019	8.76827	8.76827
mix_37115_1	0.195	0.436033	2.71333	2.76614	K02248		K00566	160.148	362.703	-1.17938	3.08321	3.08321
mix_37115_3	1.645	3.67833	2.43667	3.67083	K02246		K03581	62.1783	177.205	-1.51094	1.80846	1.80846
mix_37115_4	0	0	0.9	1.27326	K02245		K19265	773.8	2496.69	-1.68999	27.6354	27.6354
mix_37115_5	0.945	1.49615	1.71167	1.73051	K02244		K03216	165.763	270.13	-0.704529	1.5355	1.5355
mix_37115_6	0.966667	1.39965	3.465	3.45283	K02243		K03438	135.315	352.855	-1.38275	3.37509	3.37509
mix_37144_1	136.682	192.787	258.6	183.833	K19005		K08724	39.175	65.5167	-0.741929	0.388369	0.388369
mix_37145_2	128.155	179.249	259.773	176.961	K15634		K01000	78.2317	220.843	-1.4972	2.23887	2.23887
mix_37160_3	606.523	900.91	2586.44	2803.97	K17759		K03315	88.105	121.952	-0.469014	0.492597	0.492597
mix_37189_2	148.623	256.464	981.082	1066.97	K01182		K01866	45.405	85.0217	-0.904979	0.590167	0.590167
mix_37189_4	153.172	229.014	423.655	335.301	K02424		K01735	12.6	66.6883	-2.40401	0.95305	0.95305
mix_37295_1	0	0	0	0	K03043		K03785	18.535	55.845	-1.59118	0.591758	0.591758
mix_37343_1	146.01	225.238	577.427	570.003	K03778		K01736	14.7917	71.3017	-2.26915	0.976794	0.976794
mix_37381_2	123.91	170.195	160.205	117.136	K00864		K00800	35.6867	168.51	-2.23938	2.28637	2.28637
mix_37423_2	201.357	286.817	401.758	304.295	K01807		K19159	6.58833	2.57	1.35815	0.0621917	0.0621917
mix_37423_3	365.84	535.748	694.123	570.181	K01372		K00527	1177.72	6903.48	-2.55133	103.089	30
mix_37456_1	22.55	31.3916	69.3167	53.8438	K01104		K12017	3.70667	1.785	1.0542	0.0289465	0.0289465
mix_37456_2	36.5567	54.5616	96.6617	87.6093	K01104		K06286	115.607	261.655	-1.17844	2.2229	2.2229
mix_37484_1	1616.17	2354.59	5784.84	5936.61	K05520		K03609	447.982	744.522	-0.732874	4.36977	4.36977
mix_37495_1	2.41167	3.68658	1.62333	2.54936	K04564		K00995	100.775	214.403	-1.08919	1.71644	1.71644
mix_37581_1	237.033	341.159	516.1	424.957	K00571		K03742	54.9733	145.055	-1.3998	1.39999	1.39999
mix_37581_4	303.388	430.564	490.643	338.641	K01101		K03555	85.225	176.625	-1.05134	1.37647	1.37647
mix_37595_1	0.441667	0.559655	4.80833	6.41121	K04086		K03572	75.9033	154.535	-1.0257	1.1818	1.1818
mix_37622_1	8.50667	5.88879	3.59333	4.34475	K03386		K03550	105.827	350.158	-1.7263	3.93584	3.93584
mix_37631_1	14.0733	20.3044	48.9883	59.1622	K11050		K03551	94.8017	344.593	-1.86191	4.09057	4.09057
mix_37666_1	2.03167	2.75659	0	0	K02239		K03210	1429.4	3683.71	-1.36575	34.9162	30
mix_37803_1	0	0	2.80167	4.83019	K01689		K18692	443.997	624.682	-0.492572	2.63201	2.63201
mix_37816_1	0.621667	1.39009	0.656667	1.46835	K00294		K01872	219.728	445.957	-1.02118	3.39893	3.39893
mix_37906_1	0	0	0	0	K00036		K07447	104.225	259.783	-1.31761	2.3981	2.3981
mix_37910_1	2.95	6.5964	2.015	2.86019	K02945		K09888	33.0433	52.8083	-0.676406	0.290353	0.290353
mix_3796_1	3.475	5.81527	1.26167	2.82117	K15771		K07456	113.073	218.782	-0.952233	1.58002	1.58002
mix_37986_1	29.4067	41.7743	39.9617	39.4212	K03756		K03151	243.123	564.51	-1.21531	4.90763	4.90763
mix_37994_1	5.975	8.47485	7.30667	11.7041	K11189		K02428	55.2383	94.73	-0.778152	0.58349	0.58349
mix_37994_2	6.14667	13.7444	0.968333	1.65026	K08483		K03442	27.6867	50.95	-0.879891	0.345958	0.345958
mix_3799_1	0	0	0	0	K00691		K02529	114.78	400.595	-1.80327	4.64681	4.64681
mix_38038_1	0	0	0	0	K03666		K01873	156.115	285.748	-0.872136	1.92682	1.92682
mix_38060_1	349.335	534.076	319.527	287.813	K00383		K11754	102.232	189.863	-0.893119	1.30438	1.30438
mix_38086_1	140.72	217.578	229.737	235.068	K01119		K03570	447.498	728.305	-0.70266	4.13095	4.13095
mix_38181_1	1359.19	1930.52	1750.71	1305.66	K16509		K03571	74.5833	163.692	-1.13406	1.35109	1.35109
mix_38287_1	0	0	0	0	K02874		K03610	255.112	412.363	-0.692787	2.31209	2.31209
mix_38395_1	10.52	19.6787	1.48167	2.16526	K03697
mix_38428_1	3.805	8.30422	21.8867	22.5223	K02073
mix_38428_3	2.63833	3.99958	12.1917	10.7905	K07173
mix_38442_1	0	0	2.27667	5.09078	K01689
mix_38664_1	0	0	0	0	K01232
mix_38718_1	1.41333	3.16031	7.50167	10.6281	K05910
mix_38732_1	0	0	0	0	K00948
mix_38787_1	3.15	3.16972	2.75667	5.12047	K16509
mix_38865_1	0	0	0	0	K03569
mix_38880_1	5.07	7.81166	0	0	K00826
mix_38938_1	6.80167	11.3164	0	0	K02355
mix_3893_1	2.215	3.74818	17.335	18.5349	K03293
mix_39017_1	0	0	1.38333	2.18873	K04069
mix_39102_1	3.82	5.13785	8.8	7.25912	K07482
mix_39103_3	23.59	31.9943	44.6767	32.6802	K19267
mix_39143_1	749.7	1095.28	1020.4	879.725	K15634
mix_39143_2	187.462	266.051	251.848	180.798	K03665
mix_39165_1	92.545	137.401	189.515	182.57	K00869
mix_39165_2	16.9433	26.0184	40.2017	28.9429	K01597
mix_39165_3	53.42	84.1584	103.303	95.5975	K00938
mix_39165_4	23.6083	33.0268	46.3467	38.6659	K01823
mix_39177_1	45.1417	68.5682	136.107	132.826	K12952
mix_39180_6	20.52	28.476	57.7267	38.6192	K03293
mix_39180_7	410.002	566.987	316.265	312.085	K03294
mix_39180_8	145.16	202.753	182.103	120.767	K03294
mix_39199_1	228.46	328.155	482.818	390.175	K00383
mix_39199_8	2.65667	4.62443	6.495	7.61188	K03293
mix_39273_2	84.6083	118.364	99.2533	94.5681	K07024
mix_39284_1	3.47333	5.99077	1.23333	2.75782	K04564
mix_39287_3	83.3933	127.048	196.532	153.19	K07090
mix_39292_1	0	0	0.785	1.2833	K01635
mix_39293_2	37.4367	54.4284	47.3367	42.5854	K03758
mix_39333_1	157.585	219.647	371.17	263.113	K07010
mix_39333_3	26.3967	39.2576	55.4733	50.2879	K00761
mix_39333_5	86.5867	115.356	304.102	228.587	K02348
mix_39369_1	449.345	627.971	743.752	565.012	K07386
mix_39386_1	7.89	13.125	15.9933	10.9903	K03294
mix_39454_2	33.4683	49.946	92.07	87.2704	K08659
mix_39454_3	46.1833	70.2733	149.005	129.592	K01271
mix_3947_1	5.73167	9.19397	1.51167	2.37326	K01803
mix_39480_1	5.58667	10.2059	0.906667	1.37709	K08483
mix_39487_1	28.905	40.9586	31.8867	26.1405	K07258
mix_39487_2	161.327	230.772	271.112	193.318	K07024
mix_39493_1	3.63167	5.51812	6.81333	5.84605	K03294
mix_39546_1	33.1567	48.2188	108.232	82.58	K02073
mix_39546_3	11.16	14.3297	31.1967	26.5366	K02071
mix_39546_4	17.4833	24.8352	54.225	43.7352	K02072
mix_39597_1	3.00833	4.11614	8.15667	10.7788	K00763
mix_39601_4	22.7033	39.9038	75.4717	68.1465	K03671
mix_39604_3	43.0783	63.0404	97.4817	76.1152	K07090
mix_39675_1	140.662	250.108	352.308	331.625	K09825
mix_39675_2	3.79833	5.60549	5.36833	5.09204	K08161
mix_39675_3	0	0	0	0	K08161
mix_39675_6	44.785	84.1876	332.633	374.106	K06216
mix_39675_7	52.63	83.3451	234.677	240.912	K06216
mix_39678_1	4.785	10.6996	13.8717	13.0587	K06180
mix_39736_1	128.258	184.316	320.122	228.147	K06901
mix_39737_2	578.023	846.943	2085.8	2058.75	K13953
mix_39754_2	526.21	742.85	1368.37	1233.17	K09772
mix_39760_1	19.91	29.222	119.01	151.72	K07448
mix_39760_2	286.203	392.561	512.292	366.404	K03713
mix_39760_3	294.622	406.222	543.072	455.972	K01915
mix_39801_3	317.155	449.606	670.193	489.24	K12574
mix_39833_1	0.18	0.402492	1.87167	3.38156	K04077
mix_39921_1	1.3	1.90998	1.04	1.25	K04077
mix_39958_1	0	0	3.37167	6.08043	K03697
mix_39972_1	578.295	824.588	926.265	657.236	K03435
mix_39974_1	3.96667	8.0293	0.651667	0.934209	K00927
mix_39990_1	0	0	1.78667	3.99511	K07152
mix_40068_1	1.595	1.32377	0	0	K03046
mix_40072_2	0	0	0	0	K02963
mix_4008_1	220.88	305.177	394.268	267.323	K09685
mix_40136_2	118.632	172.973	170.435	139.066	K07024
mix_40238_1	1.04167	1.67617	0.65	1.45344	K01623
mix_40369_1	0.846667	1.24647	0	0	K09014
mix_40392_1	112.9	167.989	151.287	164.542	K00005
mix_40394_1	0	0	0	0	K03046
mix_40560_1	0	0	0	0	K02871
mix_40569_1	0	0	1.64	2.80095	K01621
mix_40601_1	4.91667	9.28961	2.655	5.27809	K04043
mix_40798_2	9.58	12.7991	22.0617	20.2164	K02028
mix_40889_1	0	0	0.596667	1.33419	K02933
mix_40898_1	0	0	0	0	K01643
mix_41016_1	1.075	2.40377	0.88	1.96774	K07584
mix_41097_1	0	0	0	0	K02959
mix_41097_2	0	0	0	0	K06960
mix_41215_1	4.66667	8.57762	0.948333	1.49522	K13993
mix_4121_1	3.26333	7.29704	1.49667	2.197	K13993
mix_4149_1	1249.17	1692.67	3290.73	2249.18	K06889
mix_4149_3	218.59	313.806	3370.1	4618.53	K13993
mix_4149_4	469.3	653.806	4254.29	6157.26	K13993
mix_421_4	60.49	81.4727	122.125	88.1449	K00941
mix_421_6	44.3283	65.397	85.5467	80.4852	K03469
mix_421_7	383.573	547.127	742.51	512.576	K00661
mix_421_8	246.855	375.525	435.697	323.651	K03451
mix_421_9	81.6017	127.406	143.532	107.744	K00058
mix_4222_1	5.97667	11.8721	0.438333	0.980143	K15580
mix_4223_1	1.905	3.26508	0.725	1.62115	K15580
mix_4353_1	31.7183	70.9243	55.66	124.46	K01462
mix_4353_2	1041.73	1454.65	2088.09	1452.79	K06207
mix_4502_1	4.83	4.97828	1.865	3.46604	K00382
mix_455_2	1.65833	2.36862	3.97833	3.75844	K00244
mix_4586_1	3.07667	2.80413	2.235	4.99761	K03387
mix_4605_1	2.26833	1.9683	0.291667	0.652186	K02358
mix_4628_1	0.97	1.31427	4.52333	4.17479	K02035
mix_4629_1	2.29833	3.38303	1.28	1.81902	K02035
mix_4660_1	34.3883	48.7836	88.6833	68.5959	K09117
mix_4660_10	645.612	946.831	1722.19	1487.95	K03086
mix_4660_11	32.4133	47.8623	119.158	93.175	K06967
mix_4660_13	74.5667	112.025	268.472	252.808	K03695
mix_4660_2	271.047	381.09	331.47	226.415	K06217
mix_4660_3	199.217	269.317	290.103	215.54	K07042
mix_4660_4	125.562	175.164	221.472	153.425	K00887
mix_4660_5	193.635	275.375	290.557	203.97	K03595
mix_4660_6	210.995	292.847	315.625	217.373	K03584
mix_4660_7	132.425	184.359	257.865	176.772	K01878
mix_4660_8	112.838	155.928	216.725	147.062	K01879
mix_4660_9	102.843	143.776	157.918	126.45	K02316
mix_4735_1	7.25167	15.9307	2.505	4.60099	K15770
mix_4803_4	153.363	214.542	213.177	145.931	K06131
mix_4803_5	140.858	199.867	153.978	117.733	K02077
mix_4803_6	136.775	197.208	167.757	113.246	K02074
mix_4803_7	44.8583	62.5781	79.3133	56.5102	K02075
mix_4972_1	2.15167	4.81127	0	0	K02959
mix_5000_1	1.64833	3.68579	1.135	2.53794	K01621
mix_5076_11	44.2867	63.9071	87.27	64.1153	K00600
mix_5076_12	27.8567	37.4669	61.3933	50.0897	K01491
mix_5076_6	1793.18	2464.75	2212.9	1532.44	K03530
mix_5076_8	19.005	27.5209	36.6533	29.9235	K01091
mix_5077_1	76.8033	108.915	84.695	60.1492	K07024
mix_5216_1	53.4683	75.1632	160.22	158.778	K01520
mix_5216_11	275.912	397.098	767.227	533.529	K02601
mix_5216_12	1840.17	2588.07	3539.08	2643.55	K01883
mix_5216_13	1617.13	2294.3	3233.64	2247.71	K02863
mix_5216_14	3496.1	5029.8	6577.78	4386.77	K02864
mix_5216_15	3441.37	4972.1	6219.41	4532.69	K02935
mix_5216_16	74.165	105.87	153.097	106.185	K14205
mix_5216_2	33.0183	49.4549	93.0117	85.5263	K04485
mix_5216_3	564.777	831.077	1169.04	856.674	K09698
mix_5216_4	191.713	270.512	463.462	356.165	K01883
mix_5216_5	223.233	318.233	519.928	362.308	K11145
mix_5216_6	63.5717	91.1278	146.373	104.129	K03218
mix_5216_7	115.757	164.129	222.693	150.639	K06962
mix_5216_8	31.5383	45.171	74.4667	54.9519	K03091
mix_5216_9	0	0	0	0	K02913
mix_5224_1	5.09833	2.56173	2.40167	2.60057	K04564
mix_5230_1	2.315	1.33957	0.958333	0.988356	K03697
mix_5420_1	0.481667	0.949218	1.87333	3.44195	K04086
mix_5450_1	3.335	5.76358	0.251667	0.562744	K02794
mix_5516_2	147.9	215.226	265.87	194.46	K07024
mix_5557_1	4.21833	9.03597	1.67167	2.61724	K04077
mix_5670_1	73.5833	107.191	195.367	184.31	K01104
mix_5670_2	215.23	311.285	516.302	486.724	K06889
mix_5712_1	10.7583	6.87539	5.35167	4.37966	K06342
mix_5903_1	225.118	320.206	288.26	189.803	K03549
mix_598_1	1.655	2.40459	1.79833	3.12826	K08720
mix_6030_1	12.2817	16.9951	28.9667	25.449	K02035
mix_6090_10	94.7117	138.872	216.653	153.871	K01963
mix_6090_11	212.112	311.002	441.412	340.3	K01962
mix_6090_12	130.033	191.283	283.205	208.997	K00208
mix_6090_13	330.012	491.848	699.52	557.317	K06133
mix_6090_14	120.807	177.28	284.437	217.202	K03524
mix_6090_15	346.372	527.821	931.993	800.925	K02372
mix_6090_16	409.775	624.902	1109.65	877.096	K09458
mix_6090_2	458.405	666.407	1268.72	1189.4	K01938
mix_6090_3	231.73	340.614	642.227	450.297	K00648
mix_6090_4	1327.94	1907.95	3971.03	2922.84	K02078
mix_6090_5	442.253	653.577	1191.83	941.015	K00645
mix_6090_6	270.418	420.294	718.035	574.295	K00059
mix_6090_7	261.935	385.066	553.995	479.864	K02160
mix_6090_8	103.75	141.885	216.592	185.63	K02372
mix_6090_9	314.515	468.236	727.28	603.876	K01961
mix_6170_1	3.01833	4.48517	27.1317	27.9416	K02050
mix_6170_2	9.33667	15.3211	59.43	59.9943	K03799
mix_6171_1	3.17333	7.09579	48.2933	45.1916	K01929
mix_6171_2	4.59833	7.08828	59.545	50.0714	K02050
mix_6226_1	123.138	172.992	327.155	280.513	K01491
mix_6226_10	34.0017	48.629	102.887	89.724	K04066
mix_6226_11	123.062	177.005	284.065	221.171	K00604
mix_6226_12	84.98	125.051	186.425	132.687	K03500
mix_6226_13	200.862	282.238	404.908	315.543	K06949
mix_6226_14	234.958	337.068	555.512	460.947	K01783
mix_6226_15	147.942	218.965	354.092	254.546	K00949
mix_6226_2	103.458	150.59	267.73	203.515	K03601
mix_6226_3	182.65	267.239	587.93	468.509	K03602
mix_6226_4	59.745	81.9067	146.283	112.099	K13789
mix_6226_5	92.055	130.317	219.658	181.132	K06442
mix_6226_6	64.1133	89.8842	168.7	126.133	K03631
mix_6226_7	601.405	853.266	1156.77	875.855	K00942
mix_6226_8	821.89	1133.22	2524.56	2185.78	K03060
mix_6226_9	37.32	52.7268	78.62	58.9619	K13038
mix_6276_1	207.743	299.01	367.137	288.527	K01835
mix_6276_2	32.3033	49.8513	117.133	137.686	K09384
mix_62_1	0	0	2.11	3.52799	K02821
mix_6482_1	4.78667	9.3615	1.18	1.69872	K04077
mix_6483_1	0.998333	2.23234	1.425	3.1864	K04077
mix_6671_1	200.893	286.723	426.112	298.045	K07668
mix_6671_2	203.255	289.23	314.185	228.84	K07652
mix_6671_6	81.8917	119.703	177.583	141.08	K04771
mix_6715_10	454.105	662.754	957.85	701.726	K00948
mix_6715_2	181.432	265.066	251.703	174.882	K01867
mix_6715_3	100.33	145.887	124.667	83.9354	K01524
mix_6715_6	423.618	608.732	848.357	637.587	K01874
mix_6715_7	146.537	203.676	215.107	147.599	K03424
mix_6715_8	139.695	192.786	229.84	166.134	K02528
mix_6715_9	489.545	695.986	932.185	696.026	K04042
mix_6744_1	5.12	11.4487	0.836667	1.19847	K01689
mix_6859_2	628.627	901.35	1189.63	886.519	K00712
mix_6859_3	597.282	874.458	1152.11	839.247	K00712
mix_6872_10	236.895	338.313	499.295	404.157	K01246
mix_6872_12	287.528	414.1	569.078	423.789	K07507
mix_6872_5	64.3817	94.9674	140.833	104.358	K06216
mix_6872_8	66.3067	91.7528	127.73	91.6225	K07170
mix_6872_9	182.672	262.092	413.922	350.027	K01776
mix_6877_1	30.195	42.3527	158.038	190.348	K01586
mix_6877_2	17.9333	26.7762	159.58	201.373	K05822
mix_6877_3	51.4967	73.0012	244.102	281.262	K05823
mix_6877_4	115.07	164.978	411.378	451.669	K01714
mix_6877_5	71.4433	102.945	209.02	200.349	K00215
mix_6877_6	109.887	156.996	317.507	308.041	K00133
mix_6877_7	89.275	125.66	264.428	248.676	K00928
mix_6877_8	52.4067	74.2536	182.095	172.028	K01778
mix_6877_9	88.135	130.629	270.083	249.281	K00841
mix_6879_1	15.9933	23.2615	42.09	42.1957	K00841
mix_6928_1	4.55667	8.99694	0.951667	1.70925	K00873
mix_701_3	117.098	170.122	206.457	151.478	K07107
mix_7089_1	5.23167	11.6984	2.07833	3.42782	K00656
mix_7210_1	2.66333	4.07636	1.515	2.14258	K02358
mix_721_1	108.007	155.059	241.212	182.324	K06881
mix_7343_3	84.0233	122.122	204.86	143.966	K00937
mix_7343_4	95.355	134.669	217.503	163.854	K00937
mix_7343_5	101.803	144.802	209.86	164.586	K01524
mix_736_2	559.423	809.647	656.87	493.081	K03366
mix_7423_2	20.8167	32.5271	60.39	52.0457	K07496
mix_7423_3	32.02	44.0356	65.8917	51.575	K03756
mix_7425_2	32.5583	43.5658	68.1	51.5448	K07496
mix_7425_3	19.735	28.6397	56.7883	46.9768	K00941
mix_7425_4	549.192	801.297	560.35	388.781	K01104
mix_7433_1	0	0	2.95167	3.70628	K00382
mix_7434_1	11.8817	17.0895	1.045	2.33669	K00382
mix_7458_4	542.158	776.627	1368.44	1186.76	K00763
mix_747_5	1986.48	2870.77	4924.98	4204.91	K00926
mix_762_1	3.64167	5.21449	0.838333	1.19038	K01834
mix_7994_1	0	0	0.251667	0.562744	K13993
mix_7996_2	2.12833	4.7591	9.165	14.4343	K13993
mix_7997_1	0	0	3.55667	5.55429	K13993
mix_7997_2	0	0	6.755	11.2946	K13993
mix_811_1	25.39	38.9188	68.0867	53.5897	K06216
mix_8132_1	4.61667	6.54527	1.70833	3.5162	K02358
mix_8146_1	6.19667	13.8562	2.54	4.17635	K06950
mix_8147_1	3.25	6.12795	0.171667	0.383858	K06950
mix_8151_1	0	0	0	0	K03697
mix_8151_2	0	0	0	0	K03704
mix_8152_2	0	0	0	0	K03704
mix_8169_2	78.765	112.606	135.957	98.7577	K01595
mix_8170_2	67.5717	92.1855	78.39	60.2787	K01893
mix_8172_1	21.14	31.4947	58.105	43.8488	K06216
mix_819_1	29.1267	42.7497	81.07	79.4063	K07491
mix_8216_1	176.687	238.007	379.378	272.533	K02356
mix_8216_10	256.542	371.811	552.483	454.729	K03106
mix_8216_14	855.672	1259.09	1955.52	1384.64	K02959
mix_8216_15	301.607	401.621	736.052	584.128	K06960
mix_8216_16	109.832	150.089	199.653	136.072	K02860
mix_8216_17	86.5083	125.092	173.538	125.019	K00554
mix_8216_18	1164.62	1696	3411.2	2472.53	K02884
mix_8216_19	127.01	174.459	224.725	204.756	K15634
mix_8216_2	183.377	257.136	356.973	263.874	K07030
mix_8216_23	91.1717	135.671	270.81	240.923	K03823
mix_8216_3	97.4017	137.172	210.877	158.146	K03655
mix_8216_4	76.9917	110.29	181.783	139.087	K03621
mix_8216_5	213.983	350.235	822.887	669.125	K02078
mix_8216_6	65.8567	97.9698	247.905	199.109	K03685
mix_8216_7	47.7383	66.1125	168.92	150.309	K03529
mix_8216_8	123.968	176.299	310.237	266.319	K03110
mix_8216_9	31.6633	50.9348	64.7617	47.8631	K09787
mix_8262_2	537.785	756.473	1669.91	1810.37	K04042
mix_8262_3	3287.26	4592.06	6235.51	5029.12	K03048
mix_8262_4	179.692	256.079	435.26	366.207	K01937
mix_8262_5	428.915	612.123	946.767	807.32	K00790
mix_8262_6	13178.7	18280.6	34803.3	23123.8	K02909
mix_8316_1	902.165	1269.93	1773.87	1245.35	K03545
mix_8316_10	128.247	286.768	420.748	281.906	K09976
mix_8316_2	597.592	838.478	1206.26	918.33	K03544
mix_8316_3	173.357	255.194	325.577	268.003	K03978
mix_8316_4	257.383	370.268	627.843	585.311	K03979
mix_8316_5	121.697	170.845	266.108	200.437	K00784
mix_8316_6	73.7483	101.958	173.788	137.391	K07462
mix_8316_7	169.542	239.242	436.592	373.897	K00759
mix_831_1	5.45167	12.1903	0	0	K02509
mix_8458_3	40.8117	56.6931	57.0417	38.4297	K02031
mix_8458_4	25.7783	35.7022	40.865	28.7487	K02033
mix_8458_5	29.3267	36.9101	47.3817	32.9756	K02034
mix_8458_6	92.9117	132.153	179.12	117.785	K02035
mix_8459_1	30.925	48.7088	112.912	101.59	K01119
mix_8459_3	50.7333	72.4718	127.773	106.926	K02035
mix_8459_4	8.19167	12.0553	20.775	15.3754	K01281
mix_8459_5	8.65833	11.9509	22.0067	16.3199	K01303
mix_8460_3	153.87	225.333	378.817	307.52	K02035
mix_8461_1	1.79833	2.59473	1.825	2.45905	K02035
mix_8462_3	22.27	32.1411	41.7483	32.2796	K02035
mix_8463_2	11.28	15.7032	28.6383	19.7498	K02035
mix_8464_2	33.53	48.0654	71.8767	58.7566	K01281
mix_8464_3	440.76	628.123	968.95	706.299	K01259
mix_8646_1	6.89333	14.6798	1.84167	2.88147	K00656
mix_8647_1	7.47167	16.7072	0	0	K00656
mix_8649_3	30.885	47.0833	91.1583	85.1587	K07478
mix_8650_1	69.1817	94.246	181.295	139.256	K08161
mix_8651_4	5.43167	9.56959	16.4683	12.3481	K00016
mix_8651_5	10.515	16.0423	20.825	19.0339	K00841
mix_8674_4	48.22	76.0677	110.512	125.707	K07559
mix_8674_6	680.983	1012.39	2699.07	2527.97	K01126
mix_8801_1	4.815	7.62039	1.775	2.78895	K02871
mix_8801_2	2.97333	4.97032	1.27333	2.84726	K02996
mix_8997_1	220.352	304.306	365.413	300.295	K07816
mix_8997_10	138.425	190.432	348.535	246.312	K01925
mix_8997_11	107.607	147.454	258.57	176.463	K02563
mix_8997_12	37.0083	52.4126	72.7067	49.0398	K03589
mix_8997_13	301.867	428.33	611.862	425.325	K03590
mix_8997_14	383.24	540.896	779.798	552.137	K03531
mix_8997_15	92.0917	157.027	210.068	152.909	K02221
mix_8997_17	348.012	500.813	752.025	545.505	K04074
mix_8997_18	103.058	142.944	229.838	163.614	K01870
mix_8997_19	38.4117	54.6793	61.0967	47.878	K03704
mix_8997_2	121.715	164.614	227.75	165.368	K00858
mix_8997_21	181.742	256.798	364.312	294.013	K01243
mix_8997_22	279.058	401.777	634.585	530.204	K04487
mix_8997_24	160.148	235.104	362.703	280.628	K00566
mix_8997_25	75.46	100.936	203.393	163.932	K15634
mix_8997_27	62.1783	87.4132	177.205	144.85	K03581
mix_8997_28	773.8	1170.06	2496.69	2412.43	K19265
mix_8997_3	66.8117	91.5304	120.26	81.3771	K06180
mix_8997_4	165.763	230.201	270.13	209.526	K03216
mix_8997_6	135.315	189.139	352.855	243.425	K03438
mix_8997_8	39.175	55.9939	65.5167	50.0906	K08724
mix_8997_9	78.2317	114.771	220.843	169.757	K01000
mix_9016_3	25.2433	36.1387	40.9467	30.1445	K03315
mix_9016_4	0	0	0	0	K03315
mix_9016_5	62.8617	86.3883	81.005	58.9373	K03315
mix_9016_6	45.405	67.6219	85.0217	68.0226	K01866
mix_9017_1	1.935	3.58634	6.80333	8.20994	K03856
mix_9017_2	12.6	20.5042	66.6883	65.4714	K01735
mix_9017_3	18.535	28.4239	55.845	57.5766	K03785
mix_9017_6	14.7917	21.3853	71.3017	74.8636	K01736
mix_9017_7	35.6867	51.6221	168.51	186.244	K00800
mix_9051_1	6.58833	14.732	2.57	5.74669	K19159
mix_9051_2	3.02167	3.89147	1.675	2.37669	K19157
mix_918_1	2.63333	5.88831	0.758333	1.69568	K00016
mix_9234_1	8.24833	16.4603	2.61333	3.83914	K00016
mix_943_1	0.345	0.771443	1.71167	2.44178	K11717
mix_953_1	0.735	1.64351	0.533333	1.19257	K00134
mix_9593_1	481.582	851.964	2721.73	2732.38	K00527
mix_9594_1	696.133	1216.53	4181.74	4486.01	K00527
mix_9660_1	3.70667	5.4559	1.785	3.99138	K12017
mix_9825_1	115.607	160.002	261.655	204.189	K06286
mix_9825_10	447.982	615.782	744.522	584.587	K03609
mix_9825_12	100.775	149.211	214.403	178.013	K00995
mix_9825_13	54.9733	80.7256	145.055	140.981	K03742
mix_9825_14	49.72	70.9036	172.508	168.337	K03553
mix_9825_15	669.13	924.102	1093.2	738.515	K18682
mix_9825_16	85.225	121.389	176.625	152.284	K03555
mix_9825_17	75.9033	108.43	154.535	114.45	K03572
mix_9825_18	105.827	152.387	350.158	317.436	K03550
mix_9825_19	94.8017	141.681	344.593	308.781	K03551
mix_9825_2	136.102	195.146	352.967	277.261	K04487
mix_9825_20	1429.4	2044.57	3683.71	2660.08	K03210
mix_9825_21	259.398	369.439	462.297	322.338	K06881
mix_9825_22	443.997	634.381	624.682	429.428	K18692
mix_9825_23	219.728	310.156	445.957	317.717	K01872
mix_9825_24	104.225	137.512	259.783	172.226	K07447
mix_9825_26	33.0433	49.8029	52.8083	51.1799	K09888
mix_9825_28	113.073	158.794	218.782	170.154	K07456
mix_9825_29	316.258	495.189	897.518	756.417	K03671
mix_9825_3	243.123	354.098	564.51	473.761	K03151
mix_9825_30	55.2383	77.3911	94.73	65.2225	K02428
mix_9825_31	27.6867	38.8714	50.95	54.3099	K03442
mix_9825_34	114.78	170.274	400.595	397.319	K02529
mix_9825_4	156.115	217.176	285.748	194.193	K01873
mix_9825_5	102.232	143.127	189.863	135.331	K11754
mix_9825_6	280.267	390.194	568.942	407.123	K03569
mix_9825_7	447.498	617.974	728.305	502.07	K03570
mix_9825_8	74.5833	110.315	163.692	124.031	K03571
mix_9825_9	255.112	348.553	412.363	284.988	K03610
mix_9940_3	2686.1	3745.35	9289.42	10089.4	K13993
mix_9976_1	1.87167	2.36913	6.75833	6.81882	K02073
mix_9976_2	2.44167	3.53428	7.90333	6.63664	K02072
mix_9976_3	0.865	1.04041	4.07167	4.20272	K02071
mix_997_1	0.961667	2.15035	1.27667	2.85471	K05520

## Sheet: fpkm_annotation_all
geneID	S0026S	S0026X	S1026S	S1026X	S2626S	S2626X	S0046S	S0046X	S1046S	S1046X	S2646S_1	S2646X_1	COG_class	COG_class_annotation	GO_annotation	KEGG_annotation	KOG_class	KOG_class_annotation	Pfam_annotation	Swissprot_annotation	eggNOG_annotation	nr_annotation	Name
mix_10000_1	0	0	0	0	0	0	0	0	0	1.81	0	0	-	-	-	-	-	-	-	-	-	-	-
mix_10001_1	19.66	18.56	14.27	15.67	1.56	0	27.23	20.33	6.77	4.75	0	0	--	--	Molecular Function: RNA polymerase II transcription cofactor activity (GO:0001104);; Biological Process: regulation of transcription from RNA polymerase II promoter (GO:0006357);; Cellular Component: mediator complex (GO:0016592);;	--	--	--	--	sp|P34162|MED20_YEAST	component of the Mediator complex, a coactivator involved in the regulated transcription of nearly all RNA polymerase II-dependent genes. Mediator functions as a bridge to convey information from gene-specific regulatory proteins to the basal RNA polymerase II transcription machinery. Mediator is recruited to promoters by direct interactions with regulatory proteins and serves as a scaffold for t…	gi|523422896|emb|CDF89182.1| ZYBA0S03-11100g1_1 [Zygosaccharomyces bailii CLIB 213]	d__Eukaryota 100;k__Fungi 100;p__Ascomycota 100;c__Saccharomycetes 100;o__Saccharomycetales 100;f__Saccharomycetaceae 100;g__Zygosaccharomyces 100;s__Zygosaccharomyces bailii 100;
mix_10004_1	60.66	51.61	27.18	7.26	7.22	4.2	36.55	34.37	12.63	10.07	0	0	--	--	Molecular Function: RNA polymerase II transcription cofactor activity (GO:0001104);; Biological Process: regulation of transcription from RNA polymerase II promoter (GO:0006357);; Cellular Component: mediator complex (GO:0016592);;	--	--	--	--	sp|P34162|MED20_YEAST	component of the Mediator complex, a coactivator involved in the regulated transcription of nearly all RNA polymerase II-dependent genes. Mediator functions as a bridge to convey information from gene-specific regulatory proteins to the basal RNA polymerase II transcription machinery. Mediator is recruited to promoters by direct interactions with regulatory proteins and serves as a scaffold for t…	gi|523422896|emb|CDF89182.1| ZYBA0S03-11100g1_1 [Zygosaccharomyces bailii CLIB 213]	d__Eukaryota 100;k__Fungi 100;p__Ascomycota 100;c__Saccharomycetes 100;o__Saccharomycetales 100;f__Saccharomycetaceae 100;g__Zygosaccharomyces 100;s__Zygosaccharomyces bailii 100;
mix_10005_1	0	0	0	0	0	0	0	0	0	0	0	0	[K]	Transcription	--	--	[K]	Transcription	--	sp|P36594|RPB1_SCHPO	--	--	-
mix_10006_1	0	0	0	0	0	0	0	0	0	0	0	0	[K]	Transcription	Molecular Function: DNA binding (GO:0003677);; Molecular Function: DNA-directed RNA polymerase activity (GO:0003899);; Cellular Component: DNA-directed RNA polymerase II, core complex (GO:0005665);; Cellular Component: cytosol (GO:0005829);; Biological Process: transcription from RNA polymerase II promoter (GO:0006366);;	K03006|9.3e-12|gnl|BL_ORD_ID|13051816|	[K]	Transcription	--	sp|P36594|RPB1_SCHPO	DNA-dependent RNA polymerase catalyzes the transcription of DNA into RNA using the four ribonucleoside triphosphates as substrates (By similarity)	gi|891556839|ref|XP_013017875.1| RNA polymerase II large subunit Rpb1 [Schizosaccharomyces octosporus yFS286]<>gi|528062672|gb|EPX72235.1| RNA polymerase II large subunit Rpb1 [Schizosaccharomyces octosporus yFS286]	d__Eukaryota 100;k__Fungi 100;p__Ascomycota 100;c__Schizosaccharomycetes 100;o__Schizosaccharomycetales 100;f__Schizosaccharomycetaceae 100;g__Schizosaccharomyces 100;s__Schizosaccharomyces cryophilus 33;
mix_1000_1	3.69	15.99	20.03	42.02	20.14	2.5	0.41	0.25	0.94	1.36	0	0.06	[R]	General function prediction only	--	K14558|0.0e+00|gnl|BL_ORD_ID|13051498|	[A]	RNA processing and modification	--	sp|Q9C1X1|PWP2_SCHPO	periodic tryptophan protein	gi|19112135|ref|NP_595343.1| U3 snoRNP-associated protein Utp1 (predicted) [Schizosaccharomyces pombe 972h-]<>gi|30580487|sp|Q9C1X1.1|PWP2_SCHPO RecName: Full=Periodic tryptophan protein 2 homolog<>gi|12311748|emb|CAC22605.1| U3 snoRNP-associated protein Utp1 (predicted) [Schizosaccharomyces pombe]	d__Eukaryota 100;k__Fungi 100;p__Ascomycota 100;c__Schizosaccharomycetes 100;o__Schizosaccharomycetales 100;f__Schizosaccharomycetaceae 100;g__Schizosaccharomyces 100;s__Schizosaccharomyces pombe 100;
mix_10011_1	4.94	28.73	45.15	63.77	34.02	3.77	0.2	0.48	2.16	1.6	0.08	0.03	[K]	Transcription	--	K03006|0.0e+00|gnl|BL_ORD_ID|13051816|	[K]	Transcription	--	sp|P36594|RPB1_SCHPO	DNA-dependent RNA polymerase catalyzes the transcription of DNA into RNA using the four ribonucleoside triphosphates as substrates (By similarity)	gi|19112465|ref|NP_595673.1| RNA polymerase II large subunit Rpb1 [Schizosaccharomyces pombe 972h-]<>gi|548817|sp|P36594.1|RPB1_SCHPO RecName: Full=DNA-directed RNA polymerase II subunit rpb1; Short=RNA polymerase II subunit 1; Short=RNA polymerase II subunit B1; AltName: Full=DNA-directed RNA polymerase III largest subunit<>gi|256599715|pdb|3H0G|A Chain A, Rna Polymerase Ii From Schizosaccharomy…	d__Eukaryota 100;k__Fungi 100;p__Ascomycota 100;c__Schizosaccharomycetes 100;o__Schizosaccharomycetales 100;f__Schizosaccharomycetaceae 100;g__Schizosaccharomyces 100;s__Schizosaccharomyces pombe 100;
mix_10014_1	30.46	111.87	128.2	102.5	184.19	15.39	1.2	0	8.05	1.25	0	0	-	-	-	-	-	-	-	-	-	-	-
mix_10016_1	188.53	0	279.51	279.52	0	0	36.77	0	55.23	61.09	0	0	[GEPR]	--	Cellular Component: integral to membrane (GO:0016021);; Molecular Function: substrate-specific transmembrane transporter activity (GO:0022891);; Biological Process: transmembrane transport (GO:0055085);;	--	[R]	General function prediction only	--	sp|P39932|STL1_YEAST	Transporter	gi|578052610|emb|CDH12218.1| probable Sugar transporter STL1 [Zygosaccharomyces bailii ISA1307]	d__Eukaryota 100;k__Fungi 100;p__Ascomycota 100;c__Saccharomycetes 100;o__Saccharomycetales 100;f__Saccharomycetaceae 100;g__Zygosaccharomyces 100;s__Zygosaccharomyces bailii 100;
mix_10017_1	340.7	267.6	683.7	446.33	73.96	10.75	184.51	126.28	189.71	106.85	0.23	0.49	[GEPR]	--	Cellular Component: integral to membrane (GO:0016021);; Molecular Function: substrate-specific transmembrane transporter activity (GO:0022891);; Biological Process: transmembrane transport (GO:0055085);;	--	[R]	General function prediction only	--	sp|P39932|STL1_YEAST	Transporter	gi|254582535|ref|XP_002498999.1| ZYRO0E01210p [Zygosaccharomyces rouxii]<>gi|238942573|emb|CAR30744.1| ZYRO0E01210p [Zygosaccharomyces rouxii]	d__Eukaryota 100;k__Fungi 100;p__Ascomycota 100;c__Saccharomycetes 100;o__Saccharomycetales 100;f__Saccharomycetaceae 100;g__Zygosaccharomyces 100;s__Zygosaccharomyces rouxii 100;
mix_10017_2	0	0	0	0	0	0	0	0	0	0	0	0	-	-	-	-	-	-	-	-	-	-	-
mix_10018_2	0	0	0	0	0	0	0	0	0	0	0	0	-	-	-	-	-	-	-	-	-	-	-
mix_10019_1	0	0	0	0	0	0	0	0	0	0	0	0	-	-	-	-	-	-	-	-	-	-	-
mix_1001_1	0	5.5	0	0	0	0	0	0	0	0	0	0	[CR]	--	Cellular Component: cytoplasm (GO:0005737);; Molecular Function: zinc ion binding (GO:0008270);; Molecular Function: oxidoreductase activity (GO:0016491);; Biological Process: oxidation-reduction process (GO:0055114);;	K07512|2.7e-32|gnl|BL_ORD_ID|7031210|	[KC]	--	--	sp|Q8WZM4|ETR2_CANTR	alcohol dehydrogenase	gi|695111567|gb|KGK38122.1| hypothetical protein JL09_g2729 [Pichia kudriavzevii]	d__Eukaryota 100;k__Fungi 100;p__Ascomycota 100;c__Saccharomycetes 100;o__Saccharomycetales 100;f__Pichiaceae 100;g__Pichia 100;s__Pichia kudriavzevii 100;
mix_10022_1	0	0	0	0	1115.9	0	0	385.19	0	0	0	0	--	--	Cellular Component: mitochondrial intermembrane space (GO:0005758);; Biological Process: copper ion transport (GO:0006825);; Molecular Function: copper chaperone activity (GO:0016531);;	K02260|1.6e-17|gnl|BL_ORD_ID|11998041|	[O]	Posttranslational modification, protein turnover, chaperones	--	sp|Q12287|COX17_YEAST	cytochrome C oxidase	gi|523422100|emb|CDF88361.1| BN860_08460g1_1 [Zygosaccharomyces bailii CLIB 213]	d__Eukaryota 100;k__Fungi 100;p__Ascomycota 100;c__Saccharomycetes 100;o__Saccharomycetales 100;f__Saccharomycetaceae 100;g__Zygosaccharomyces 100;s__Zygosaccharomyces bailii 100;
mix_10023_1	0.62	2.88	1.78	1.77	3.54	1.23	0.89	0.81	4.56	8.73	0.69	0.55	-	-	-	-	-	-	-	-	-	-	-
mix_10024_1	4.1	5.25	4.62	5.16	0	0	11.12	13.99	2.81	1.2	0	0	--	--	Cellular Component: integral to membrane (GO:0016021);;	K08658|2.1e-116|gnl|BL_ORD_ID|14835552|	[O]	Posttranslational modification, protein turnover, chaperones	--	sp|Q03530|RCE1_YEAST	RCE1 homolog, prenyl protein protease (S. cerevisiae)	gi|523423262|emb|CDF89561.1| ZYBA0S04-07250g1_1 [Zygosaccharomyces bailii CLIB 213]<>gi|578056294|emb|CDH08529.1| related to CAAX prenyl protease 2 [Zygosaccharomyces bailii ISA1307]	d__Eukaryota 100;k__Fungi 100;p__Ascomycota 100;c__Saccharomycetes 100;o__Saccharomycetales 100;f__Saccharomycetaceae 100;g__Zygosaccharomyces 100;s__Zygosaccharomyces bailii 100;
mix_10025_2	0	0	0	0	0	0	0	0	0	0	0	0	-	-	-	-	-	-	-	-	-	-	-
mix_10026_1	5.22	0	0	0	0	0	0	0	21.61	0	0	0	--	--	--	--	--	--	--	--	--	gi|578051060|emb|CDH13685.1| uncharacterized protein ZBAI_05471 [Zygosaccharomyces bailii ISA1307]	d__Eukaryota 100;k__Fungi 100;p__Ascomycota 100;c__Saccharomycetes 100;o__Saccharomycetales 100;f__Saccharomycetaceae 100;g__Zygosaccharomyces 100;s__Zygosaccharomyces bailii 100;
mix_10026_2	11.7	13.31	13.4	4.76	3.81	1	23.52	19.1	4.09	7.23	0	0	--	--	--	K08658|5.2e-112|gnl|BL_ORD_ID|14835552|	[O]	Posttranslational modification, protein turnover, chaperones	--	sp|Q03530|RCE1_YEAST	RCE1 homolog, prenyl protein protease (S. cerevisiae)	gi|578051059|emb|CDH13684.1| related to CAAX prenyl protease 2 [Zygosaccharomyces bailii ISA1307]	d__Eukaryota 100;k__Fungi 100;p__Ascomycota 100;c__Saccharomycetes 100;o__Saccharomycetales 100;f__Saccharomycetaceae 100;g__Zygosaccharomyces 100;s__Zygosaccharomyces bailii 100;
mix_10027_1	14.34	16.22	5.74	0	0	1.31	5.82	3.52	0	2.14	0	0	[F]	Nucleotide transport and metabolism	Molecular Function: thymidylate synthase activity (GO:0004799);; Biological Process: dTMP biosynthetic process (GO:0006231);; Biological Process: methylation (GO:0032259);;	K00560|2.2e-92|gnl|BL_ORD_ID|8860271|	[F]	Nucleotide transport and metabolism	--	sp|P0CS13|TYSY_CRYNB	Provides the sole de novo source of dTMP for DNA biosynthesis (By similarity)	gi|523420974|emb|CDF87195.1| BN860_00936g1_1 [Zygosaccharomyces bailii CLIB 213]<>gi|578049036|emb|CDH15740.1| probable CDC21-Thymidylate synthase [Zygosaccharomyces bailii ISA1307]	d__Eukaryota 100;k__Fungi 100;p__Ascomycota 100;c__Saccharomycetes 100;o__Saccharomycetales 100;f__Saccharomycetaceae 100;g__Zygosaccharomyces 100;s__Zygosaccharomyces bailii 100;
mix_10028_1	13.44	30.14	25.43	0	0	0	13.66	25.13	14.27	2.95	0	0	[F]	Nucleotide transport and metabolism	Molecular Function: thymidylate synthase activity (GO:0004799);; Biological Process: dTMP biosynthetic process (GO:0006231);; Biological Process: methylation (GO:0032259);;	K00560|1.8e-48|gnl|BL_ORD_ID|14831419|	[F]	Nucleotide transport and metabolism	--	sp|P06785|TYSY_YEAST	Provides the sole de novo source of dTMP for DNA biosynthesis (By similarity)	gi|523420974|emb|CDF87195.1| BN860_00936g1_1 [Zygosaccharomyces bailii CLIB 213]<>gi|578049036|emb|CDH15740.1| probable CDC21-Thymidylate synthase [Zygosaccharomyces bailii ISA1307]	d__Eukaryota 100;k__Fungi 100;p__Ascomycota 100;c__Saccharomycetes 100;o__Saccharomycetales 100;f__Saccharomycetaceae 100;g__Zygosaccharomyces 100;s__Zygosaccharomyces bailii 100;
mix_10029_1	17.38	14.58	6.99	3.48	0	0.61	12.71	10.3	5.24	1.98	0	0	[F]	Nucleotide transport and metabolism	Molecular Function: thymidylate synthase activity (GO:0004799);; Biological Process: dTMP biosynthetic process (GO:0006231);; Biological Process: methylation (GO:0032259);;	K00560|8.5e-161|gnl|BL_ORD_ID|14831419|	[F]	Nucleotide transport and metabolism	--	sp|P06785|TYSY_YEAST	Provides the sole de novo source of dTMP for DNA biosynthesis (By similarity)	gi|523420974|emb|CDF87195.1| BN860_00936g1_1 [Zygosaccharomyces bailii CLIB 213]<>gi|578049036|emb|CDH15740.1| probable CDC21-Thymidylate synthase [Zygosaccharomyces bailii ISA1307]	d__Eukaryota 100;k__Fungi 100;p__Ascomycota 100;c__Saccharomycetes 100;o__Saccharomycetales 100;f__Saccharomycetaceae 100;g__Zygosaccharomyces 100;s__Zygosaccharomyces bailii 100;
mix_10029_2	14.63	9.53	11.78	15.18	0	0	16.29	7.44	26.69	5.72	0	0	--	--	Cellular Component: chromosome, centromeric region (GO:0000775);; Cellular Component: nucleus (GO:0005634);; Biological Process: meiotic chromosome segregation (GO:0045132);;	K11582|1.9e-13|gnl|BL_ORD_ID|14831418|	--	--	--	--	by preventing premature dissociation of cohesin complex from centromeres after prophase, when most of cohesin complex dissociates from chromosomes arms	gi|578049035|emb|CDH15739.1| uncharacterized protein ZBAI_07526 [Zygosaccharomyces bailii ISA1307]	d__Eukaryota 100;k__Fungi 100;p__Ascomycota 100;c__Saccharomycetes 100;o__Saccharomycetales 100;f__Saccharomycetaceae 100;g__Zygosaccharomyces 100;s__Zygosaccharomyces bailii 100;
mix_1002_1	0	1.43	0	0	0	0	7.67	0	0	0	0	0	[I]	Lipid transport and metabolism	Molecular Function: hydroxymethylglutaryl-CoA synthase activity (GO:0004421);; Cellular Component: nucleus (GO:0005634);; Cellular Component: cytosol (GO:0005829);; Biological Process: acetyl-CoA metabolic process (GO:0006084);; Biological Process: ergosterol biosynthetic process (GO:0006696);; Biological Process: farnesyl diphosphate biosynthetic process, mevalonate pathway (GO:0010142);; Biolog…	K01641|2.0e-64|gnl|BL_ORD_ID|11998505|	[I]	Lipid transport and metabolism	--	sp|P54839|HMCS_YEAST	hydroxymethylglutaryl-CoA synthase activity	gi|767211074|gb|AJS89693.1| Erg13p [Saccharomyces cerevisiae YJM1399]	d__Eukaryota 100;k__Fungi 92;p__Ascomycota 92;c__Saccharomycetes 92;o__Saccharomycetales 92;f__Saccharomycetaceae 92;g__Saccharomyces 77;s__Saccharomyces cerevisiae 77;
mix_10030_1	723.33	444.35	372.88	161.34	120.33	64.74	1292.98	1033.23	357.17	82.13	0	0.31	[EJ]	--	Biological Process: cellular amino acid metabolic process (GO:0006520);;	--	[E]	Amino acid transport and metabolism	--	sp|P38616|YGP1_YEAST	L-asparaginase	gi|523422373|emb|CDF88637.1| BN860_14884g1_1 [Zygosaccharomyces bailii CLIB 213]<>gi|578049920|emb|CDH14487.1| related to Protein YGP1 [Zygosaccharomyces bailii ISA1307]	d__Eukaryota 100;k__Fungi 100;p__Ascomycota 100;c__Saccharomycetes 100;o__Saccharomycetales 100;f__Saccharomycetaceae 100;g__Zygosaccharomyces 100;s__Zygosaccharomyces bailii 100;
mix_10031_1	545.38	347.54	270.44	88.55	129.35	44.03	1285.82	838.99	284.32	67.59	0.29	0.31	[EJ]	--	Biological Process: cellular amino acid metabolic process (GO:0006520);;	--	[E]	Amino acid transport and metabolism	--	sp|P38616|YGP1_YEAST	L-asparaginase	gi|578055518|emb|CDH09199.1| related to Protein YGP1 [Zygosaccharomyces bailii ISA1307]	d__Eukaryota 100;k__Fungi 100;p__Ascomycota 100;c__Saccharomycetes 100;o__Saccharomycetales 100;f__Saccharomycetaceae 100;g__Zygosaccharomyces 100;s__Zygosaccharomyces bailii 100;
mix_10032_1	0	0	0	0	0	0	0	0	0	0	0	0	-	-	-	-	-	-	-	-	-	-	-
mix_10033_1	20.19	13.2	6.85	13.3	19.74	2.3	10.59	6.44	23.29	27.61	2.6	1.36	-	-	-	-	-	-	-	-	-	-	-
mix_10035_1	0	0.35	0.75	1.5	0	0	15.46	4.09	0	0	0	0	--	--	Molecular Function: nucleotide binding (GO:0000166);; Biological Process: formation of translation preinitiation complex (GO:0001731);; Molecular Function: translation initiation factor activity (GO:0003743);; Cellular Component: cytosol (GO:0005829);; Biological Process: regulation of translational initiation (GO:0006446);; Cellular Component: cytoplasmic stress granule (GO:0010494);; Cellular C…	K03253|8.7e-146|gnl|BL_ORD_ID|8857936|	[J]	Translation, ribosomal structure and biogenesis	--	sp|P06103|EIF3B_YEAST	Component of the eukaryotic translation initiation factor 3 (eIF-3) complex, which is involved in protein synthesis and, together with other initiation factors, stimulates binding of mRNA and methionyl-tRNAi to the 40S ribosome (By similarity)	gi|365982877|ref|XP_003668272.1| hypothetical protein NDAI_0A08760 [Naumovozyma dairenensis CBS 421]<>gi|343767038|emb|CCD23029.1| hypothetical protein NDAI_0A08760 [Naumovozyma dairenensis CBS 421]	d__Eukaryota 100;k__Fungi 100;p__Ascomycota 100;c__Saccharomycetes 100;o__Saccharomycetales 100;f__Saccharomycetaceae 100;g__Naumovozyma 100;s__Naumovozyma dairenensis 100;
mix_10036_1	0	0	0	0	0	0	0	0	0	0	0	0	-	-	-	-	-	-	-	-	-	-	-
mix_10037_1	0	0	0	0	0	0	0	0	0	0	0	0	-	-	-	-	-	-	-	-	-	-	-
mix_10038_1	12.8	8.23	12.17	2.51	7.69	1.53	16.68	23.14	18.92	6.26	0	0.23	[I]	Lipid transport and metabolism	Molecular Function: catalytic activity (GO:0003824);; Biological Process: metabolic process (GO:0008152);;	K13239|3.3e-105|gnl|BL_ORD_ID|14833606|	[I]	Lipid transport and metabolism	--	sp|Q05871|ECI1_YEAST	Enoyl-CoA hydratase	gi|523423492|emb|CDF89798.1| ZYBA0S05-01948g1_1 [Zygosaccharomyces bailii CLIB 213]	d__Eukaryota 100;k__Fungi 100;p__Ascomycota 100;c__Saccharomycetes 100;o__Saccharomycetales 100;f__Saccharomycetaceae 100;g__Zygosaccharomyces 100;s__Zygosaccharomyces bailii 100;
mix_10038_2	0	0	0	0	0	0	0	0	0	0	0	0	--	--	--	--	--	--	--	--	Conserved hypothetical, protein	gi|578047111|emb|CDH17557.1| uncharacterized protein ZBAI_09345 [Zygosaccharomyces bailii ISA1307]	d__Eukaryota 100;k__Fungi 100;p__Ascomycota 100;c__Saccharomycetes 100;o__Saccharomycetales 100;f__Saccharomycetaceae 100;g__Zygosaccharomyces 100;s__Zygosaccharomyces bailii 100;
mix_10039_1	3.88	7.2	5.53	6.28	1.1	0.38	2.78	6.04	1.89	0.83	0	0	[I]	Lipid transport and metabolism	Molecular Function: catalytic activity (GO:0003824);; Biological Process: metabolic process (GO:0008152);;	K13239|7.8e-107|gnl|BL_ORD_ID|14833606|	[I]	Lipid transport and metabolism	--	sp|Q05871|ECI1_YEAST	Enoyl-CoA hydratase	gi|523423492|emb|CDF89798.1| ZYBA0S05-01948g1_1 [Zygosaccharomyces bailii CLIB 213]	d__Eukaryota 100;k__Fungi 100;p__Ascomycota 100;c__Saccharomycetes 100;o__Saccharomycetales 100;f__Saccharomycetaceae 100;g__Zygosaccharomyces 100;s__Zygosaccharomyces bailii 100;
mix_1003_1	0	0	0	0	0	0	3.08	0	0	0	0	0	[I]	Lipid transport and metabolism	Molecular Function: hydroxymethylglutaryl-CoA synthase activity (GO:0004421);; Cellular Component: nucleus (GO:0005634);; Cellular Component: cytosol (GO:0005829);; Biological Process: acetyl-CoA metabolic process (GO:0006084);; Biological Process: ergosterol biosynthetic process (GO:0006696);; Biological Process: farnesyl diphosphate biosynthetic process, mevalonate pathway (GO:0010142);; Biolog…	K01641|1.9e-54|gnl|BL_ORD_ID|3304618|	[I]	Lipid transport and metabolism	--	sp|P54839|HMCS_YEAST	hydroxymethylglutaryl-CoA synthase activity	gi|50289085|ref|XP_446972.1| hypothetical protein [Candida glabrata CBS 138]<>gi|49526281|emb|CAG59905.1| unnamed protein product [Candida glabrata]	d__Eukaryota 100;k__Fungi 100;p__Ascomycota 100;c__Saccharomycetes 100;o__Saccharomycetales 100;f__Saccharomycetaceae 100;g__Nakaseomyces 100;s__Candida glabrata 100;
mix_10042_1	20.47	23.06	21.33	15.92	6.2	3.7	28.96	28.2	8.37	8.73	0	0	--	--	Molecular Function: sequence-specific DNA binding transcription factor activity (GO:0003700);; Biological Process: regulation of transcription, DNA-dependent (GO:0006355);; Molecular Function: sequence-specific DNA binding (GO:0043565);;	--	[K]	Transcription	--	sp|P40535|ACA2_YEAST	Transcription factor	gi|523421830|emb|CDF88088.1| BN860_02036g1_1 [Zygosaccharomyces bailii CLIB 213]<>gi|578055645|emb|CDH09082.1| uncharacterized protein ZBAI_00866 [Zygosaccharomyces bailii ISA1307]	d__Eukaryota 100;k__Fungi 100;p__Ascomycota 100;c__Saccharomycetes 100;o__Saccharomycetales 100;f__Saccharomycetaceae 100;g__Zygosaccharomyces 100;s__Zygosaccharomyces bailii 100;
mix_10043_1	28.84	18.53	31.11	32.72	5.31	2.47	36.54	37.87	28.9	11.76	0	0	--	--	Molecular Function: sequence-specific DNA binding transcription factor activity (GO:0003700);; Biological Process: regulation of transcription, DNA-dependent (GO:0006355);; Molecular Function: sequence-specific DNA binding (GO:0043565);;	--	[K]	Transcription	--	sp|P40535|ACA2_YEAST	Transcription factor	gi|523421830|emb|CDF88088.1| BN860_02036g1_1 [Zygosaccharomyces bailii CLIB 213]<>gi|578055645|emb|CDH09082.1| uncharacterized protein ZBAI_00866 [Zygosaccharomyces bailii ISA1307]	d__Eukaryota 100;k__Fungi 100;p__Ascomycota 100;c__Saccharomycetes 100;o__Saccharomycetales 100;f__Saccharomycetaceae 100;g__Zygosaccharomyces 100;s__Zygosaccharomyces bailii 100;
mix_10044_1	19.85	25.28	0	0	20.27	0	40.14	74.17	0	7.87	0	0	-	-	-	-	-	-	-	-	-	-	-
mix_10044_2	21.47	17.01	12.72	10.59	10.61	1.97	23.77	16.28	13.4	7.24	0	0	[C]	Energy production and conversion	--	--	[C]	Energy production and conversion	--	sp|Q02895|AAD16_YEAST	Aldo keto reductase	gi|523421750|emb|CDF88000.1| BN860_19350g1_1 [Zygosaccharomyces bailii CLIB 213]	d__Eukaryota 100;k__Fungi 100;p__Ascomycota 100;c__Saccharomycetes 100;o__Saccharomycetales 100;f__Saccharomycetaceae 100;g__Zygosaccharomyces 100;s__Zygosaccharomyces bailii 100;
mix_10045_2	6.14	0	10.26	0	0	0	7.78	4.69	2.75	0	0	0	[C]	Energy production and conversion	--	--	[C]	Energy production and conversion	--	sp|Q02895|AAD16_YEAST	Aldo keto reductase	gi|523421750|emb|CDF88000.1| BN860_19350g1_1 [Zygosaccharomyces bailii CLIB 213]	d__Eukaryota 100;k__Fungi 100;p__Ascomycota 100;c__Saccharomycetes 100;o__Saccharomycetales 100;f__Saccharomycetaceae 100;g__Zygosaccharomyces 100;s__Zygosaccharomyces bailii 100;
mix_10047_1	25.69	22.28	18.71	29.74	6.62	1.44	24.91	20.48	10.2	10.67	0	0	[C]	Energy production and conversion	--	--	[C]	Energy production and conversion	--	sp|Q02895|AAD16_YEAST	Aldo keto reductase	gi|523421750|emb|CDF88000.1| BN860_19350g1_1 [Zygosaccharomyces bailii CLIB 213]	d__Eukaryota 100;k__Fungi 100;p__Ascomycota 100;c__Saccharomycetes 100;o__Saccharomycetales 100;f__Saccharomycetaceae 100;g__Zygosaccharomyces 100;s__Zygosaccharomyces bailii 100;
mix_10049_1	0	0	0	0	0	0	0	0	0	0	0	0	-	-	-	-	-	-	-	-	-	-	-
mix_1004_1	0	0	3.42	8.47	194.95	343.1	0.3	11.75	149.59	217.26	194.32	203.38	-	-	-	-	-	-	-	-	-	-	-
mix_10052_1	0	0	0	0	0	0	0	0	0	0	0	0	-	-	-	-	-	-	-	-	-	-	-
mix_10054_1	0	0	0	0	0	0	0	0	0	0	0	0	--	--	--	--	--	--	--	sp|A0A023PXQ4|YM173_YEAST	--	gi|259148756|emb|CAY82001.1| EC1118_1M3_3620p [Saccharomyces cerevisiae EC1118]	d__Eukaryota 100;k__Fungi 100;p__Ascomycota 100;c__Saccharomycetes 100;o__Saccharomycetales 100;f__Saccharomycetaceae 100;g__Saccharomyces 100;s__Saccharomyces cerevisiae 100;
mix_10055_1	0	0	0	0	0	0	9.15	0	13.09	2.84	0	0	--	--	--	--	--	--	--	sp|A0A023PXQ4|YM173_YEAST	--	gi|728050430|sp|A0A023PXQ4.1|YM173_YEAST RecName: Full=Putative uncharacterized membrane protein YMR173W-A [Saccharomyces cerevisiae S288c]<>gi|614461571|gb|AHX39335.1| putative membrane protein [Saccharomyces cerevisiae]	d__Eukaryota 100;k__Fungi 100;p__Ascomycota 100;c__Saccharomycetes 100;o__Saccharomycetales 100;f__Saccharomycetaceae 100;g__Saccharomyces 100;s__Saccharomyces cerevisiae 100;
mix_10056_1	0	0	0	0	0	0	23.15	20.02	7.4	0	0.42	0	--	--	--	--	--	--	--	sp|A0A023PXQ4|YM173_YEAST	--	gi|259148756|emb|CAY82001.1| EC1118_1M3_3620p [Saccharomyces cerevisiae EC1118]	d__Eukaryota 100;k__Fungi 100;p__Ascomycota 100;c__Saccharomycetes 100;o__Saccharomycetales 100;f__Saccharomycetaceae 100;g__Saccharomyces 100;s__Saccharomyces cerevisiae 100;
mix_10057_1	0	1.94	0	2.75	2.75	0	2.1	1.27	3.56	0.52	0	0	--	--	--	--	--	--	--	sp|P15563|YMN3_PODAN	--	gi|1016561668|gb|AMX22219.1| LAGLIDADG endonuclease (mitochondrion) [Chrysoporthe cubensis]	d__Eukaryota 100;k__Fungi 100;p__Ascomycota 100;c__Sordariomycetes 100;o__Diaporthales 100;f__Cryphonectriaceae 100;g__Chrysoporthe 100;s__Chrysoporthe cubensis 100;
mix_10058_1	0.98	1.3	0	1.37	2.75	0	0	2.54	1.19	1.56	0	0.28	--	--	--	--	--	--	--	sp|P15563|YMN3_PODAN	--	gi|1016561668|gb|AMX22219.1| LAGLIDADG endonuclease (mitochondrion) [Chrysoporthe cubensis]	d__Eukaryota 100;k__Fungi 100;p__Ascomycota 100;c__Sordariomycetes 100;o__Diaporthales 100;f__Cryphonectriaceae 100;g__Chrysoporthe 100;s__Chrysoporthe cubensis 50;
mix_10059_1	8.21	22.04	57.15	49.9	33.33	14.22	1.78	15.66	73.15	57.63	6.6	5.45	-	-	-	-	-	-	-	-	-	-	-
mix_1005_1	0.15	0	0	0	0	0	0	0	0	0	0	0	-	-	-	-	-	-	-	-	-	-	-
mix_10060_1	0.34	0.45	0	0	0	0	29.07	48.2	26.43	14.58	0	0.2	[G]	Carbohydrate transport and metabolism	Cellular Component: phosphopyruvate hydratase complex (GO:0000015);; Molecular Function: magnesium ion binding (GO:0000287);; Cellular Component: fungal-type vacuole (GO:0000324);; Molecular Function: phosphopyruvate hydratase activity (GO:0004634);; Cellular Component: mitochondrion (GO:0005739);; Biological Process: glycolysis (GO:0006096);; Biological Process: regulation of vacuole fusion, non…	K01689|1.1e-151|gnl|BL_ORD_ID|8858909|	[G]	Carbohydrate transport and metabolism	--	sp|Q70CP7|ENO_KLULA	Catalyzes the reversible conversion of 2- phosphoglycerate into phosphoenolpyruvate. It is essential for the degradation of carbohydrates via glycolysis (By similarity)	gi|171455|gb|AAA88712.1| enolase [Saccharomyces cerevisiae]<>gi|151943528|gb|EDN61839.1| enolase [Saccharomyces cerevisiae YJM789]<>gi|259146755|emb|CAY80012.1| Eno1p [Saccharomyces cerevisiae EC1118]<>gi|323304755|gb|EGA58515.1| Eno1p [Saccharomyces cerevisiae FostersB]<>gi|349578457|dbj|GAA23623.1| K7_Eno1p [Saccharomyces cerevisiae Kyokai no. 7]<>gi|365765501|gb|EHN07009.1| Eno1p [Saccharomyce…	d__Eukaryota 100;k__Fungi 100;p__Ascomycota 100;c__Saccharomycetes 100;o__Saccharomycetales 100;f__Saccharomycetaceae 100;g__Saccharomyces 100;s__Saccharomyces cerevisiae 50;
mix_10062_1	1.77	0	16.6	4.92	0	0	45.32	22.82	0	0	0	0	[O]	Posttranslational modification, protein turnover, chaperones	Cellular Component: nucleus (GO:0005634);; Cellular Component: cytosol (GO:0005829);; Molecular Function: thioredoxin peroxidase activity (GO:0008379);; Cellular Component: integral to membrane (GO:0016021);; Biological Process: negative regulation of sequence-specific DNA binding transcription factor activity (GO:0043433);; Biological Process: cell redox homeostasis (GO:0045454);; Molecular Func…	K03386|3.3e-97|gnl|BL_ORD_ID|13931163|	[O]	Posttranslational modification, protein turnover, chaperones	--	sp|Q9Y7F0|TSA1_CANAL	alkyl hydroperoxide reductase	gi|156844947|ref|XP_001645534.1| hypothetical protein Kpol_1004p51 [Vanderwaltozyma polyspora DSM 70294]<>gi|156116198|gb|EDO17676.1| hypothetical protein Kpol_1004p51 [Vanderwaltozyma polyspora DSM 70294]	d__Eukaryota 100;k__Fungi 100;p__Ascomycota 100;c__Saccharomycetes 100;o__Saccharomycetales 100;f__Saccharomycetaceae 100;g__Kluyveromyces 33;s__Kluyveromyces dobzhanskii 33;s__Kluyveromyces dobzhanskii CBS 2104 33;
mix_10063_1	3.73	4.84	0	0	0	0	2.57	0	0	3.54	0	0	--	--	Molecular Function: DNA binding (GO:0003677);;	K12860|2.6e-49|gnl|BL_ORD_ID|8838748|	[AD]	--	--	sp|Q03654|CEF1_YEAST	Myblike DNAbinding domain containing protein	gi|578050239|emb|CDH14170.1| related to Pre-mRNA-splicing factor CEF1 [Zygosaccharomyces bailii ISA1307]	d__Eukaryota 100;k__Fungi 100;p__Ascomycota 100;c__Saccharomycetes 100;o__Saccharomycetales 100;f__Saccharomycetaceae 100;g__Zygosaccharomyces 100;s__Zygosaccharomyces bailii 100;
mix_10064_1	1.29	5.97	9.08	5.37	3.57	0	2.76	6.67	6.2	4.75	0	0	--	--	Molecular Function: DNA binding (GO:0003677);;	K12860|4.5e-88|gnl|BL_ORD_ID|8838748|	[AD]	--	--	sp|Q03654|CEF1_YEAST	Myblike DNAbinding domain containing protein	gi|578055873|emb|CDH08878.1| related to Pre-mRNA-splicing factor CEF1 [Zygosaccharomyces bailii ISA1307]	d__Eukaryota 100;k__Fungi 100;p__Ascomycota 100;c__Saccharomycetes 100;o__Saccharomycetales 100;f__Saccharomycetaceae 100;g__Zygosaccharomyces 100;s__Zygosaccharomyces bailii 100;
mix_10066_1	0	0	0	0	0	0	0	0	0	0	0	0	--	--	--	--	--	--	Collagen triple helix repeat (20 copies)	--	--	--	-
mix_10067_1	0	0	0	0	0	0	10.25	0	0	0	0	0	--	--	Molecular Function: magnesium ion binding (GO:0000287);; Molecular Function: phospholipid-translocating ATPase activity (GO:0004012);; Molecular Function: ATP binding (GO:0005524);; Cellular Component: integral to membrane (GO:0016021);; Biological Process: phospholipid translocation (GO:0045332);;	K01530|4.0e-08|gnl|BL_ORD_ID|14831996|	--	--	Collagen triple helix repeat (20 copies)	--	P-type atpase	gi|578051710|emb|CDH13057.1| probable Phospholipid-transporting ATPase DNF1 [Zygosaccharomyces bailii ISA1307]	d__Eukaryota 100;k__Fungi 100;p__Ascomycota 100;c__Saccharomycetes 100;o__Saccharomycetales 100;f__Saccharomycetaceae 100;g__Zygosaccharomyces 100;s__Zygosaccharomyces bailii 100;
mix_10068_1	0.31	0	0	2.63	0	0.31	0	0	0.75	0.33	0.69	0	-	-	-	-	-	-	-	-	-	-	-
mix_10069_1	0	0	0	0	0	0	0	0	0	0	0	0	-	-	-	-	-	-	-	-	-	-	-
mix_10069_2	27.85	35.97	24.38	22.34	3.43	1.2	33.49	49.55	23.79	22.15	0	0	--	--	--	K11682|1.3e-69|gnl|BL_ORD_ID|14835032|	--	--	--	sp|P31376|SWC3_YEAST	Component of the SWR1 complex which mediates the ATP- dependent exchange of histone H2A for the H2A variant HZT1 leading to transcriptional regulation of selected genes by chromatin remodeling. Involved in chromosome stability	gi|578047857|emb|CDH16814.1| related to SWR1-complex protein 3 [Zygosaccharomyces bailii ISA1307]	d__Eukaryota 100;k__Fungi 100;p__Ascomycota 100;c__Saccharomycetes 100;o__Saccharomycetales 100;f__Saccharomycetaceae 100;g__Zygosaccharomyces 100;s__Zygosaccharomyces bailii 100;
mix_10071_1	0	0	0	0	0	0	0	0	0	0	0	0	-	-	-	-	-	-	-	-	-	-	-
mix_10072_1	8.11	3.35	2.87	7.1	8.51	5.94	2.17	2.62	6.13	14.01	0.56	0.29	-	-	-	-	-	-	-	-	-	-	-
mix_10074_3	113.74	106.77	69.49	53.56	29.98	9.66	156.06	151.4	47.41	25.73	0	0.12	--	--	--	--	--	--	--	sp|P13776|REP1_ZYGBA	--	gi|11466075|ref|NP_040498.1| hypothetical protein [Zygosaccharomyces bailii]<>gi|132333|sp|P13776.1|REP1_ZYGBA RecName: Full=Trans-acting factor B; AltName: Full=REP1<>gi|173337|gb|AAA35283.1| trans-acting factor B [Zygosaccharomyces bailii]	d__Eukaryota 100;k__Fungi 100;p__Ascomycota 100;c__Saccharomycetes 100;o__Saccharomycetales 100;f__Saccharomycetaceae 100;g__Zygosaccharomyces 100;s__Zygosaccharomyces bailii 100;
mix_10074_4	0	0	0	0	0	0	0	0	0	0	0	0	-	-	-	-	-	-	-	-	-	-	-
mix_10075_1	0	0	0	0	0	0	19.39	0	0	0	0	0	-	-	-	-	-	-	-	-	-	-	-
mix_10076_1	30.97	27.06	31.25	15.44	16.95	2.69	42.6	38.61	13.35	14.64	0	0	-	-	-	-	-	-	-	-	-	-	-
mix_10076_2	67.25	67.77	39.91	30.25	21.16	9.14	60.89	57.04	33.4	17.08	0	0.09	--	--	--	--	--	--	--	sp|P13770|FLP_LACFM	--	gi|262193251|gb|ACY30628.1| evolved site-specific tyrosine recombinase [Torulaspora delbrueckii]	d__Eukaryota 100;k__Fungi 100;p__Ascomycota 100;c__Saccharomycetes 100;o__Saccharomycetales 100;f__Saccharomycetaceae 100;g__Torulaspora 100;s__Torulaspora delbrueckii 100;
mix_10078_1	41.65	46.5	43.64	25.6	12.84	2.68	36.9	34.78	26.37	11.68	0	0	[J]	Translation, ribosomal structure and biogenesis	Molecular Function: GTP binding (GO:0005525);;	K06942|3.1e-224|gnl|BL_ORD_ID|14834226|	[R]	General function prediction only	--	sp|P42942|YG4I_YEAST	gtp-binding protein	gi|523424102|emb|CDF90437.1| ZYBA0S07-00958g1_1 [Zygosaccharomyces bailii CLIB 213]	d__Eukaryota 100;k__Fungi 100;p__Ascomycota 100;c__Saccharomycetes 100;o__Saccharomycetales 100;f__Saccharomycetaceae 100;g__Zygosaccharomyces 100;s__Zygosaccharomyces bailii 100;
mix_10079_1	3.8	2.78	53.79	109.02	3389.1	3936.28	4.93	118.34	1900.67	2428.25	6721.52	4574.4	[GEPR]	--	Biological Process: carbohydrate transport (GO:0008643);; Cellular Component: integral to membrane (GO:0016021);; Molecular Function: substrate-specific transmembrane transporter activity (GO:0022891);; Biological Process: transmembrane transport (GO:0055085);;	--	[R]	General function prediction only	--	sp|O52733|XYLT_LACBR	Transporter	gi|951494344|ref|WP_057865287.1| MFS transporter [Lactobacillus diolivorans]<>gi|948739703|gb|KRL64779.1| sugar transporter [Lactobacillus diolivorans DSM 14421]	d__Bacteria 100;p__Firmicutes 100;c__Bacilli 100;o__Lactobacillales 100;f__Lactobacillaceae 100;g__Lactobacillus 100;s__Lactobacillus diolivorans 100;
mix_1007_1	4.91	51.12	87.8	124.91	49.28	6	0	1.42	8.05	2.67	0	0	[E]	Amino acid transport and metabolism	Molecular Function: cysteine synthase activity (GO:0004124);; Cellular Component: mitochondrion (GO:0005739);; Biological Process: cysteine biosynthetic process from serine (GO:0006535);;	K01738|1.7e-191|gnl|BL_ORD_ID|13051487|	[E]	Amino acid transport and metabolism	--	sp|O59701|CYSK1_SCHPO	cysteine biosynthetic process from serine	gi|891580459|ref|XP_013021870.1| cysteine synthase [Schizosaccharomyces cryophilus OY26]<>gi|528319689|gb|EPY54263.1| cysteine synthase [Schizosaccharomyces cryophilus OY26]	d__Eukaryota 100;k__Fungi 100;p__Ascomycota 100;c__Schizosaccharomycetes 100;o__Schizosaccharomycetales 100;f__Schizosaccharomycetaceae 100;g__Schizosaccharomyces 100;s__Schizosaccharomyces cryophilus 100;
mix_1007_2	0	0	0	0	0	0	0	0	0	0	0	0	[BQ]	--	--	K06067|9.6e-14|gnl|BL_ORD_ID|13051488|	[B]	Chromatin structure and dynamics	--	sp|O59702|CLR6_SCHPO	Histone deacetylase	gi|19112125|ref|NP_595333.1| histone deacetylase (class I) Clr6 [Schizosaccharomyces pombe 972h-]<>gi|33300910|sp|O59702.1|CLR6_SCHPO RecName: Full=Histone deacetylase clr6; AltName: Full=Cryptic loci regulator 6<>gi|3135992|emb|CAA19053.1| histone deacetylase (class I) Clr6 [Schizosaccharomyces pombe]<>gi|4159997|gb|AAD05211.1| putative histone deacetylase [Schizosaccharomyces pombe]	d__Eukaryota 100;k__Fungi 100;p__Ascomycota 100;c__Schizosaccharomycetes 100;o__Schizosaccharomycetales 100;f__Schizosaccharomycetaceae 100;g__Schizosaccharomyces 100;s__Schizosaccharomyces pombe 100;
mix_10080_1	41.92	38.68	29.16	24.83	7.25	7.22	62.23	74.74	24.94	11.39	0	0	--	--	--	K11880|1.2e-123|gnl|BL_ORD_ID|14835057|	--	--	--	sp|P36040|POC2_YEAST	PAC2 family	gi|523422421|emb|CDF88685.1| BN860_16028g1_1 [Zygosaccharomyces bailii CLIB 213]<>gi|578051448|emb|CDH13232.1| related to Proteasome assembly chaperone 2 [Zygosaccharomyces bailii ISA1307]	d__Eukaryota 100;k__Fungi 100;p__Ascomycota 100;c__Saccharomycetes 100;o__Saccharomycetales 100;f__Saccharomycetaceae 100;g__Zygosaccharomyces 100;s__Zygosaccharomyces bailii 100;
mix_10081_1	22.55	26.42	16.1	5.33	5.33	3.35	36.11	18.53	7.34	4.45	0	0	--	--	--	K11880|8.7e-130|gnl|BL_ORD_ID|14835057|	--	--	--	sp|P36040|POC2_YEAST	PAC2 family	gi|523422421|emb|CDF88685.1| BN860_16028g1_1 [Zygosaccharomyces bailii CLIB 213]<>gi|578051448|emb|CDH13232.1| related to Proteasome assembly chaperone 2 [Zygosaccharomyces bailii ISA1307]	d__Eukaryota 100;k__Fungi 100;p__Ascomycota 100;c__Saccharomycetes 100;o__Saccharomycetales 100;f__Saccharomycetaceae 100;g__Zygosaccharomyces 100;s__Zygosaccharomyces bailii 100;
mix_10082_2	0	0	0	0	0	0	0	0	0	0	0	0	--	--	--	--	[K]	Transcription	--	--	--	gi|578049087|emb|CDH15503.1| uncharacterized protein ZBAI_07290 [Zygosaccharomyces bailii ISA1307]	d__Eukaryota 100;k__Fungi 100;p__Ascomycota 100;c__Saccharomycetes 100;o__Saccharomycetales 100;f__Saccharomycetaceae 100;g__Zygosaccharomyces 100;s__Zygosaccharomyces bailii 100;
mix_10083_1	5.62	4.45	19.03	6.27	7.82	2.73	13.62	14.52	1.35	9.51	0	0	--	--	Molecular Function: sequence-specific DNA binding transcription factor activity (GO:0003700);; Biological Process: regulation of transcription, DNA-dependent (GO:0006355);; Molecular Function: zinc ion binding (GO:0008270);; Molecular Function: sequence-specific DNA binding (GO:0043565);;	K09184|5.9e-41|gnl|BL_ORD_ID|14833147|	[K]	Transcription	--	sp|P42944|GZF3_YEAST	Transcription factor	gi|578049087|emb|CDH15503.1| uncharacterized protein ZBAI_07290 [Zygosaccharomyces bailii ISA1307]	d__Eukaryota 100;k__Fungi 100;p__Ascomycota 100;c__Saccharomycetes 100;o__Saccharomycetales 100;f__Saccharomycetaceae 100;g__Zygosaccharomyces 100;s__Zygosaccharomyces bailii 100;
mix_10084_1	19.95	21.53	7.43	4.41	4.4	2.56	20.24	14.94	12.69	10.03	0	0	--	--	Molecular Function: sequence-specific DNA binding transcription factor activity (GO:0003700);; Biological Process: regulation of transcription, DNA-dependent (GO:0006355);; Molecular Function: zinc ion binding (GO:0008270);; Molecular Function: sequence-specific DNA binding (GO:0043565);;	K09184|1.3e-14|gnl|BL_ORD_ID|13699029|	[K]	Transcription	--	sp|P42944|GZF3_YEAST	Transcription factor	gi|523421206|emb|CDF87431.1| BN860_06216g1_1 [Zygosaccharomyces bailii CLIB 213]	d__Eukaryota 100;k__Fungi 100;p__Ascomycota 100;c__Saccharomycetes 100;o__Saccharomycetales 100;f__Saccharomycetaceae 100;g__Zygosaccharomyces 100;s__Zygosaccharomyces bailii 100;
mix_10086_1	0	0	0	0	0	0	0	0	0	0	0	0	--	--	--	--	--	--	--	--	NA	gi|1003368270|gb|AMO47060.1| Conserved uncharacterized protein [Enterobacter sp. FY-07]
mix_10089_1	1.02	0	1.95	0.97	0	0	14.67	4.42	0	0	0	0	--	--	Biological Process: maturation of SSU-rRNA from tricistronic rRNA transcript (SSU-rRNA, 5.8S rRNA, LSU-rRNA) (GO:0000462);; Biological Process: endonucleolytic cleavage of tricistronic rRNA transcript (SSU-rRNA, 5.8S rRNA, LSU-rRNA) (GO:0000479);; Cellular Component: preribosome (GO:0030684);; Cellular Component: nuclear lumen (GO:0031981);;	K14772|1.0e-96|gnl|BL_ORD_ID|8857883|	[V]	Defense mechanisms	--	sp|P35194|UTP20_YEAST	UTP20, small subunit (SSU) processome component, homolog (yeast)	gi|365982771|ref|XP_003668219.1| hypothetical protein NDAI_0A08230 [Naumovozyma dairenensis CBS 421]<>gi|343766985|emb|CCD22976.1| hypothetical protein NDAI_0A08230 [Naumovozyma dairenensis CBS 421]	d__Eukaryota 100;k__Fungi 100;p__Ascomycota 100;c__Saccharomycetes 100;o__Saccharomycetales 100;f__Saccharomycetaceae 100;g__Naumovozyma 100;s__Naumovozyma dairenensis 100;
mix_10090_1	2.29	3	6.25	6.08	0	0	0	0	2.66	0	0	0	--	--	--	--	--	--	--	--	--	gi|578053852|emb|CDH11001.1| uncharacterized protein ZBAI_02787 [Zygosaccharomyces bailii ISA1307]	d__Eukaryota 100;k__Fungi 100;p__Ascomycota 100;c__Saccharomycetes 100;o__Saccharomycetales 100;f__Saccharomycetaceae 100;g__Zygosaccharomyces 100;s__Zygosaccharomyces bailii 100;
mix_10091_1	6.72	13.27	11.67	27.49	2.28	0.8	17.84	15.13	0	14.74	0	0	--	--	--	--	--	--	--	--	--	gi|578053852|emb|CDH11001.1| uncharacterized protein ZBAI_02787 [Zygosaccharomyces bailii ISA1307]	d__Eukaryota 100;k__Fungi 100;p__Ascomycota 100;c__Saccharomycetes 100;o__Saccharomycetales 100;f__Saccharomycetaceae 100;g__Zygosaccharomyces 100;s__Zygosaccharomyces bailii 100;
mix_10091_2	0	0	0	0	0	0	0	0	0	0	0	0	-	-	-	-	-	-	-	-	-	-	-
mix_10094_1	0	0	0	0	16.29	0	14.6	8.85	4.07	0	0	0	-	-	-	-	-	-	-	-	-	-	-
mix_10096_1	0	0	0	0	0	0	4.08	0	0	0	0	0	-	-	-	-	-	-	-	-	-	-	-
mix_10097_1	0	0	2.83	0	0	0	29.36	3.43	0	0	0	0	[LKJ]	--	Biological Process: maturation of SSU-rRNA from tricistronic rRNA transcript (SSU-rRNA, 5.8S rRNA, LSU-rRNA) (GO:0000462);; Biological Process: maturation of LSU-rRNA from tricistronic rRNA transcript (SSU-rRNA, 5.8S rRNA, LSU-rRNA) (GO:0000463);; Molecular Function: RNA binding (GO:0003723);; Molecular Function: ATP-dependent RNA helicase activity (GO:0004004);; Molecular Function: ATP binding (…	K13179|2.1e-145|gnl|BL_ORD_ID|13700749|	[A]	RNA processing and modification	--	sp|Q03532|HAS1_YEAST	purine NTP-dependent helicase activity	gi|367016289|ref|XP_003682643.1| hypothetical protein TDEL_0G00650 [Torulaspora delbrueckii]<>gi|359750306|emb|CCE93432.1| hypothetical protein TDEL_0G00650 [Torulaspora delbrueckii]	d__Eukaryota 100;k__Fungi 100;p__Ascomycota 100;c__Saccharomycetes 100;o__Saccharomycetales 100;f__Saccharomycetaceae 100;g__Saccharomyces 63;s__Saccharomyces cerevisiae 31;
mix_10098_1	2.86	5.97	14.43	0.88	1.37	0	3.06	6.72	5.26	3.72	0.09	0.81	--	--	Molecular Function: hydrolase activity (GO:0016787);;	--	--	--	--	sp|Q82081|POLG_HRV3	--	gi|827047339|ref|YP_009140562.1| putative polyprotein [La Jolla virus]<>gi|821369845|gb|AKH40287.1| putative polyprotein [La Jolla virus]
mix_10099_2	4.24	4.36	2.67	2.65	2.65	0	7.4	2.44	2.28	0	0	0	--	--	--	--	--	--	--	--	Dentin matrix acidic phosphoprotein 1	gi|578047992|emb|CDH16674.1| uncharacterized protein ZBAI_08462 [Zygosaccharomyces bailii ISA1307]	d__Eukaryota 100;k__Fungi 100;p__Ascomycota 100;c__Saccharomycetes 100;o__Saccharomycetales 100;f__Saccharomycetaceae 100;g__Zygosaccharomyces 100;s__Zygosaccharomyces bailii 100;
mix_1009_1	4.4	6.29	0	0	1.42	0	0	0	0	0	0	0	--	--	Cellular Component: nucleus (GO:0005634);;	K14794|3.5e-127|gnl|BL_ORD_ID|10427983|	[S]	Function unknown	--	sp|Q12754|RRP12_YEAST	ribosomal RNA processing 12 homolog (S. cerevisiae)	gi|695111433|gb|KGK37990.1| hypothetical protein JL09_g2882 [Pichia kudriavzevii]	d__Eukaryota 100;k__Fungi 100;p__Ascomycota 100;c__Saccharomycetes 100;o__Saccharomycetales 100;f__Pichiaceae 100;g__Pichia 100;s__Pichia kudriavzevii 100;
mix_10100_1	0.7	0	0	3.87	5.79	0	56.89	36.23	1.68	0	0	0	--	--	Cellular Component: cytosol (GO:0005829);; Cellular Component: plasma membrane (GO:0005886);; Molecular Function: thioredoxin peroxidase activity (GO:0008379);; Biological Process: response to metal ion (GO:0010038);; Biological Process: cellular response to oxidative stress (GO:0034599);; Biological Process: cell redox homeostasis (GO:0045454);; Biological Process: oxidation-reduction process (G…	K14171|2.2e-68|gnl|BL_ORD_ID|11998157|	[O]	Posttranslational modification, protein turnover, chaperones	--	sp|P38013|AHP1_YEAST	peroxiredoxin	gi|753535942|pdb|4OWY|A Chain A, Crystal Structure Of Ahp1 From Saccharomyces Cerevisiae. Investigating The Electron Transfers.<>gi|753535943|pdb|4OWY|B Chain B, Crystal Structure Of Ahp1 From Saccharomyces Cerevisiae. Investigating The Electron Transfers.<>gi|753535944|pdb|4OWY|C Chain C, Crystal Structure Of Ahp1 From Saccharomyces Cerevisiae. Investigating The Electron Transfers.<>gi|753535945…	d__Eukaryota 100;k__Fungi 100;p__Ascomycota 100;c__Saccharomycetes 100;o__Saccharomycetales 100;f__Saccharomycetaceae 100;g__Saccharomyces 86;s__Saccharomyces cerevisiae 71;
mix_10102_1	0	0	0	0	1.74	0	0	0	0	0.66	0	0	-	-	-	-	-	-	-	-	-	-	-
mix_10103_1	84.07	87.09	81.78	7.64	52.03	7.82	197.35	298.48	27.55	25.69	0	0	--	--	--	--	--	--	--	sp|P38841|YHT8_YEAST	NA	gi|523422371|emb|CDF88635.1| BN860_14840g1_1 [Zygosaccharomyces bailii CLIB 213]<>gi|578049922|emb|CDH14489.1| uncharacterized protein ZBAI_06275 [Zygosaccharomyces bailii ISA1307]	d__Eukaryota 100;k__Fungi 100;p__Ascomycota 100;c__Saccharomycetes 100;o__Saccharomycetales 100;f__Saccharomycetaceae 100;g__Zygosaccharomyces 100;s__Zygosaccharomyces bailii 100;
mix_10103_2	0	0	0	0	0	0	0	0	0	0	0	0	[O]	Posttranslational modification, protein turnover, chaperones	Biological Process: protein folding (GO:0006457);; Cellular Component: prefoldin complex (GO:0016272);; Molecular Function: unfolded protein binding (GO:0051082);;	K09550|8.5e-14|gnl|BL_ORD_ID|3305620|	[O]	Posttranslational modification, protein turnover, chaperones	--	sp|P53900|PFD4_YEAST	Molecular chaperone capable of stabilizing a range of proteins. Seems to fulfill an ATP-independent, HSP70-like function in archaeal de novo protein folding (By similarity)	gi|523422370|emb|CDF88634.1| BN860_14818g1_1 [Zygosaccharomyces bailii CLIB 213]<>gi|578049923|emb|CDH14490.1| probable Prefoldin subunit 4 [Zygosaccharomyces bailii ISA1307]	d__Eukaryota 100;k__Fungi 100;p__Ascomycota 100;c__Saccharomycetes 100;o__Saccharomycetales 100;f__Saccharomycetaceae 100;g__Zygosaccharomyces 100;s__Zygosaccharomyces bailii 100;
mix_10104_1	260.52	180.08	193.09	47.1	85.4	27.64	339.42	399.55	175.01	45.36	0	0	--	--	--	--	--	--	--	sp|P38841|YHT8_YEAST	NA	gi|523422371|emb|CDF88635.1| BN860_14840g1_1 [Zygosaccharomyces bailii CLIB 213]<>gi|578049922|emb|CDH14489.1| uncharacterized protein ZBAI_06275 [Zygosaccharomyces bailii ISA1307]	d__Eukaryota 100;k__Fungi 100;p__Ascomycota 100;c__Saccharomycetes 100;o__Saccharomycetales 100;f__Saccharomycetaceae 100;g__Zygosaccharomyces 100;s__Zygosaccharomyces bailii 100;
mix_10104_2	1.62	0	4.32	0	0	0	2.25	4.12	0	1.57	0	0	[O]	Posttranslational modification, protein turnover, chaperones	Biological Process: protein folding (GO:0006457);; Cellular Component: prefoldin complex (GO:0016272);; Molecular Function: unfolded protein binding (GO:0051082);;	K09550|7.9e-49|gnl|BL_ORD_ID|14835189|	[O]	Posttranslational modification, protein turnover, chaperones	--	sp|P53900|PFD4_YEAST	Molecular chaperone capable of stabilizing a range of proteins. Seems to fulfill an ATP-independent, HSP70-like function in archaeal de novo protein folding (By similarity)	gi|523422370|emb|CDF88634.1| BN860_14818g1_1 [Zygosaccharomyces bailii CLIB 213]<>gi|578049923|emb|CDH14490.1| probable Prefoldin subunit 4 [Zygosaccharomyces bailii ISA1307]	d__Eukaryota 100;k__Fungi 100;p__Ascomycota 100;c__Saccharomycetes 100;o__Saccharomycetales 100;f__Saccharomycetaceae 100;g__Zygosaccharomyces 100;s__Zygosaccharomyces bailii 100;
mix_10105_1	6.16	27.95	148.43	294.31	117.32	72.77	3.72	18.51	201.58	165.06	28.53	16.12	-	-	-	-	-	-	-	-	-	-	-
mix_10106_1	0	0	36.93	6.94	0	0	82.82	0	0	0	0	0	[J]	Translation, ribosomal structure and biogenesis	Biological Process: maturation of SSU-rRNA from tricistronic rRNA transcript (SSU-rRNA, 5.8S rRNA, LSU-rRNA) (GO:0000462);; Molecular Function: structural constituent of ribosome (GO:0003735);; Biological Process: translation (GO:0006412);; Cellular Component: cytosolic small ribosomal subunit (GO:0022627);;	K02969|1.2e-50|gnl|BL_ORD_ID|6656398|	[J]	Translation, ribosomal structure and biogenesis	--	sp|P38701|RS20_YEAST	tRNA binding	gi|410074387|ref|XP_003954776.1| hypothetical protein KAFR_0A02030 [Kazachstania africana CBS 2517]<>gi|372461358|emb|CCF55641.1| hypothetical protein KAFR_0A02030 [Kazachstania africana CBS 2517]	d__Eukaryota 100;k__Fungi 100;p__Ascomycota 100;c__Saccharomycetes 100;o__Saccharomycetales 100;f__Saccharomycetaceae 100;g__Kazachstania 50;s__Kazachstania africana 50;
mix_10107_1	5.09	0	0	0	0	0	14.1	34.42	0	0	0	0	[J]	Translation, ribosomal structure and biogenesis	Biological Process: maturation of SSU-rRNA from tricistronic rRNA transcript (SSU-rRNA, 5.8S rRNA, LSU-rRNA) (GO:0000462);; Biological Process: cytoplasmic translation (GO:0002181);; Molecular Function: mRNA binding (GO:0003729);; Molecular Function: structural constituent of ribosome (GO:0003735);; Cellular Component: cytosolic small ribosomal subunit (GO:0022627);;	K02969|3.8e-48|gnl|BL_ORD_ID|11996859|	[J]	Translation, ribosomal structure and biogenesis	--	sp|P38701|RS20_YEAST	tRNA binding	gi|6321772|ref|NP_011848.1| ribosomal 40S subunit protein S20 [Saccharomyces cerevisiae S288c]<>gi|730687|sp|P38701.3|RS20_YEAST RecName: Full=40S ribosomal protein S20<>gi|313103673|pdb|3IZB|J Chain J, Localization Of The Small Subunit Ribosomal Proteins Into A 6.1 A Cryo-Em Map Of Saccharomyces Cerevisiae Translating 80s Ribosome<>gi|315113461|pdb|3O2Z|N Chain N, Yeast 80s Ribosome. This Entry …	d__Eukaryota 100;k__Fungi 100;p__Ascomycota 100;c__Saccharomycetes 100;o__Saccharomycetales 100;f__Saccharomycetaceae 100;g__Saccharomyces 80;s__Saccharomyces cerevisiae 40;
mix_10108_1	1977.36	2127.15	1442.34	845.37	197.42	124.08	1268.31	1909.16	741.26	523.04	0	0	[J]	Translation, ribosomal structure and biogenesis	Molecular Function: structural constituent of ribosome (GO:0003735);; Biological Process: translation (GO:0006412);; Cellular Component: small ribosomal subunit (GO:0015935);;	K02969|3.8e-58|gnl|BL_ORD_ID|14833978|	[J]	Translation, ribosomal structure and biogenesis	--	sp|P38701|RS20_YEAST	tRNA binding	gi|523423780|emb|CDF90094.1| ZYBA0S06-00408g1_1 [Zygosaccharomyces bailii CLIB 213]<>gi|578048002|emb|CDH16684.1| probable 40S ribosomal protein S20 [Zygosaccharomyces bailii ISA1307]<>gi|578053186|emb|CDH11686.1| probable 40S ribosomal protein S20 [Zygosaccharomyces bailii ISA1307]	d__Eukaryota 100;k__Fungi 100;p__Ascomycota 100;c__Saccharomycetes 100;o__Saccharomycetales 100;f__Saccharomycetaceae 100;g__Zygosaccharomyces 100;s__Zygosaccharomyces bailii 100;
mix_1010_1	1.18	5.76	6.82	7.37	3.41	0.79	0	0	0	0	0	0	[BK]	--	--	K06062|5.8e-256|gnl|BL_ORD_ID|13050937|	[BK]	--	--	sp|Q9UUK2|GCN5_SCHPO	bromodomain	gi|19115719|ref|NP_594807.1| SAGA complex histone acetyltransferase catalytic subunit Gcn5 [Schizosaccharomyces pombe 972h-]<>gi|59799535|sp|Q9UUK2.1|GCN5_SCHPO RecName: Full=Histone acetyltransferase gcn5<>gi|5731938|emb|CAB52569.1| SAGA complex histone acetyltransferase catalytic subunit Gcn5 [Schizosaccharomyces pombe]<>gi|42558226|dbj|BAD11106.1| histone acetyltransferase Gcn5 [Schizosaccharo…	d__Eukaryota 100;k__Fungi 100;p__Ascomycota 100;c__Schizosaccharomycetes 100;o__Schizosaccharomycetales 100;f__Schizosaccharomycetaceae 100;g__Schizosaccharomyces 100;s__Schizosaccharomyces pombe 100;
mix_10110_1	1008.95	893.87	1139.96	718.5	275.26	151.95	590.33	784.7	460.3	280.63	0	0.75	[J]	Translation, ribosomal structure and biogenesis	Molecular Function: structural constituent of ribosome (GO:0003735);; Cellular Component: ribosome (GO:0005840);; Biological Process: translation (GO:0006412);;	K02962|4.2e-61|gnl|BL_ORD_ID|8861484|	[J]	Translation, ribosomal structure and biogenesis	--	sp|P14127|RS17B_YEAST	Ribosomal protein	gi|523423532|emb|CDF89840.1| ZYBA0S05-02960g1_1 [Zygosaccharomyces bailii CLIB 213]<>gi|578046925|emb|CDH17599.1| 40S ribosomal protein S17-A [Zygosaccharomyces bailii ISA1307]<>gi|578052701|emb|CDH11917.1| 40S ribosomal protein S17-A [Zygosaccharomyces bailii ISA1307]	d__Eukaryota 100;k__Fungi 100;p__Ascomycota 100;c__Saccharomycetes 100;o__Saccharomycetales 100;f__Saccharomycetaceae 100;g__Zygosaccharomyces 100;s__Zygosaccharomyces bailii 100;
mix_10110_2	3.55	0.52	0	0	2.23	0	1.13	0	0	1.27	0	0.23	--	--	--	--	--	--	--	sp|Q04110|ECM11_YEAST	NA	gi|523423533|emb|CDF89841.1| ZYBA0S05-02982g1_1 [Zygosaccharomyces bailii CLIB 213]<>gi|578046926|emb|CDH17600.1| uncharacterized protein ZBAI_09388 [Zygosaccharomyces bailii ISA1307]	d__Eukaryota 100;k__Fungi 100;p__Ascomycota 100;c__Saccharomycetes 100;o__Saccharomycetales 100;f__Saccharomycetaceae 100;g__Zygosaccharomyces 100;s__Zygosaccharomyces bailii 100;
mix_10110_3	0	0	0	0	0	0	0	0	0	0	0	0	-	-	-	-	-	-	-	-	-	-	-
mix_10111_1	15.66	53.28	0	0	0	0	0	0	0	0	0	0	[J]	Translation, ribosomal structure and biogenesis	Molecular Function: structural constituent of ribosome (GO:0003735);; Cellular Component: ribosome (GO:0005840);; Biological Process: translation (GO:0006412);;	K02962|6.8e-42|gnl|BL_ORD_ID|12990746|	[J]	Translation, ribosomal structure and biogenesis	--	sp|P14127|RS17B_YEAST	Ribosomal protein	gi|927382698|ref|XP_013937198.1| 40S ribosomal protein S17-B [Ogataea parapolymorpha DL-1]<>gi|562977079|gb|ESX02787.1| 40S ribosomal protein S17-B [Ogataea parapolymorpha DL-1]<>gi|1037324014|gb|OBA13746.1| hypothetical protein OGAPODRAFT_17442 [Ogataea polymorpha]	d__Eukaryota 100;k__Fungi 100;p__Ascomycota 100;c__Saccharomycetes 100;o__Saccharomycetales 100;f__Pichiaceae 100;g__Ogataea 50;
mix_10112_1	241.31	331.05	46.23	100.46	133.38	6.66	250.17	531.55	132.75	22.19	0	0	--	--	--	--	--	--	--	sp|O43137|YB085_YEAST	NA	gi|523425196|emb|CDF91558.1| ZYBA0S12-01662g1_1 [Zygosaccharomyces bailii CLIB 213]	d__Eukaryota 100;k__Fungi 100;p__Ascomycota 100;c__Saccharomycetes 100;o__Saccharomycetales 100;f__Saccharomycetaceae 100;g__Zygosaccharomyces 100;s__Zygosaccharomyces bailii 100;
mix_10112_2	5.41	8.93	1.9	5.61	11.17	2.6	9.62	13.96	1.62	7.08	0	0	[H]	Coenzyme transport and metabolism	Molecular Function: GTP cyclohydrolase II activity (GO:0003935);; Biological Process: riboflavin biosynthetic process (GO:0009231);;	K01497|5.2e-89|gnl|BL_ORD_ID|14835518|	[H]	Coenzyme transport and metabolism	--	sp|P38066|RIB1_YEAST	Catalyzes the conversion of D-ribulose 5-phosphate to formate and 3,4-dihydroxy-2-butanone 4-phosphate (By similarity)	gi|578053513|emb|CDH11077.1| probable GTP cyclohydrolase-2 [Zygosaccharomyces bailii ISA1307]	d__Eukaryota 100;k__Fungi 100;p__Ascomycota 100;c__Saccharomycetes 100;o__Saccharomycetales 100;f__Saccharomycetaceae 100;g__Zygosaccharomyces 100;s__Zygosaccharomyces bailii 100;
mix_10113_1	51.02	36.94	55.01	73.56	56.65	25.67	91.34	82.6	59.23	32.24	0	0	[H]	Coenzyme transport and metabolism	Molecular Function: GTP cyclohydrolase II activity (GO:0003935);; Biological Process: riboflavin biosynthetic process (GO:0009231);;	K01497|1.8e-144|gnl|BL_ORD_ID|14835518|	[H]	Coenzyme transport and metabolism	--	sp|P38066|RIB1_YEAST	Catalyzes the conversion of D-ribulose 5-phosphate to formate and 3,4-dihydroxy-2-butanone 4-phosphate (By similarity)	gi|578053513|emb|CDH11077.1| probable GTP cyclohydrolase-2 [Zygosaccharomyces bailii ISA1307]	d__Eukaryota 100;k__Fungi 100;p__Ascomycota 100;c__Saccharomycetes 100;o__Saccharomycetales 100;f__Saccharomycetaceae 100;g__Zygosaccharomyces 100;s__Zygosaccharomyces bailii 100;
mix_10116_1	269.15	366.52	138.68	80.37	152.43	39.97	312.71	1039.99	322.38	66.56	0	0	--	--	--	--	--	--	--	sp|O43137|YB085_YEAST	NA	gi|523425196|emb|CDF91558.1| ZYBA0S12-01662g1_1 [Zygosaccharomyces bailii CLIB 213]	d__Eukaryota 100;k__Fungi 100;p__Ascomycota 100;c__Saccharomycetes 100;o__Saccharomycetales 100;f__Saccharomycetaceae 100;g__Zygosaccharomyces 100;s__Zygosaccharomyces bailii 100;
mix_10119_1	2054.78	2195.8	1407.58	758.27	475.07	227.73	1300.31	1513.47	469.16	256.34	0	1.4	[J]	Translation, ribosomal structure and biogenesis	Molecular Function: structural constituent of ribosome (GO:0003735);; Cellular Component: ribosome (GO:0005840);; Biological Process: translation (GO:0006412);;	K02934|5.9e-66|gnl|BL_ORD_ID|14832121|	[J]	Translation, ribosomal structure and biogenesis	--	sp|P05739|RL6B_YEAST	(ribosomal) protein	gi|523425116|emb|CDF91478.1| ZYBA0S11-03752g1_1 [Zygosaccharomyces bailii CLIB 213]	d__Eukaryota 100;k__Fungi 100;p__Ascomycota 100;c__Saccharomycetes 100;o__Saccharomycetales 100;f__Saccharomycetaceae 100;g__Zygosaccharomyces 100;s__Zygosaccharomyces bailii 100;
mix_1011_1	20.87	106	131.8	186.32	89.58	12.71	2.88	1.16	5.48	4.12	0	0.13	--	--	--	K18738|7.2e-205|gnl|BL_ORD_ID|13053053|	[AR]	--	--	sp|O74919|RNC1_SCHPO	mRNA transport	gi|19075184|ref|NP_587684.1| RNA-binding protein [Schizosaccharomyces pombe 972h-]<>gi|74626925|sp|O74919.1|RNC1_SCHPO RecName: Full=RNA-binding protein rnc1; AltName: Full=RNA-binding protein that suppresses calcineurin deletion 1<>gi|3702642|emb|CAA21234.1| RNA-binding protein that suppresses calcineurin deletion Rnc1 [Schizosaccharomyces pombe]	d__Eukaryota 100;k__Fungi 100;p__Ascomycota 100;c__Schizosaccharomycetes 100;o__Schizosaccharomycetales 100;f__Schizosaccharomycetaceae 100;g__Schizosaccharomyces 100;s__Schizosaccharomyces pombe 100;
mix_10121_1	1.28	1.68	3.48	0	3.34	11.68	0	3.28	2.96	6.37	0	2.76	-	-	-	-	-	-	-	-	-	-	-
mix_10123_1	48.27	32.71	58.93	36.98	3.51	7.96	50.62	65.59	18.29	10.68	0	0	[R]	General function prediction only	Molecular Function: FMN binding (GO:0010181);; Molecular Function: oxidoreductase activity (GO:0016491);; Biological Process: negative regulation of transcription, DNA-dependent (GO:0045892);; Biological Process: oxidation-reduction process (GO:0055114);;	K03809|6.6e-55|gnl|BL_ORD_ID|6657806|	[R]	General function prediction only	--	sp|Q12335|PST2_YEAST	Nadph-dependent fmn reductase	gi|578049715|emb|CDH14835.1| probable Protoplast secreted protein 2 [Zygosaccharomyces bailii ISA1307]	d__Eukaryota 100;k__Fungi 100;p__Ascomycota 100;c__Saccharomycetes 100;o__Saccharomycetales 100;f__Saccharomycetaceae 100;g__Zygosaccharomyces 100;s__Zygosaccharomyces bailii 100;
mix_10124_1	19.83	18.58	12.39	11.92	11.5	3.69	25.64	10.75	12.57	5.58	0	0.09	[GEPR]	--	Cellular Component: integral to membrane (GO:0016021);; Biological Process: transmembrane transport (GO:0055085);;	K08192|1.3e-230|gnl|BL_ORD_ID|13699135|	[G]	Carbohydrate transport and metabolism	--	sp|O94491|YC7A_SCHPO	Allantoate permease	gi|523425272|emb|CDF91639.1| ZYBA0S13-00144g1_1 [Zygosaccharomyces bailii CLIB 213]	d__Eukaryota 100;k__Fungi 100;p__Ascomycota 100;c__Saccharomycetes 100;o__Saccharomycetales 100;f__Saccharomycetaceae 100;g__Zygosaccharomyces 100;s__Zygosaccharomyces bailii 100;
mix_10126_1	0	0	0	0	0	0	0	0	0	0	0	0	--	--	--	--	--	--	Domain of unknown function (DUF4349)	--	--	--	-
mix_10129_2	0	0	0	0	0	0	0	0	0	0	0	0	-	-	-	-	-	-	-	-	-	-	-
mix_1012_1	0	139.93	0	0	0	0	0	0	0	0	0	0	-	-	-	-	-	-	-	-	-	-	-
mix_10130_2	18.23	11.8	2.41	1.2	0	1.67	36.43	43.97	7.22	2.73	0	0	-	-	-	-	-	-	-	-	-	-	-
mix_10131_1	0	0	0	0	0	0	0	0	0	0	0	0	--	--	--	--	--	--	Keratin type II head	--	--	--	-
mix_10133_1	10.06	7.22	2.39	2.37	7.1	0.83	11.41	7.61	7.14	1.8	0	0	[T]	Signal transduction mechanisms	Cellular Component: integral to membrane (GO:0016021);;	--	[T]	Signal transduction mechanisms	--	sp|Q03944|VPS64_YEAST	fha domain-containing protein	gi|523421510|emb|CDF87751.1| BN860_13630g1_1 [Zygosaccharomyces bailii CLIB 213]	d__Eukaryota 100;k__Fungi 100;p__Ascomycota 100;c__Saccharomycetes 100;o__Saccharomycetales 100;f__Saccharomycetaceae 100;g__Zygosaccharomyces 100;s__Zygosaccharomyces bailii 100;
mix_10136_1	0	0	0	0	0	0	0	0	0	0	0	0	--	--	--	--	--	--	Collagen triple helix repeat (20 copies)	--	--	--	-
mix_10137_1	0	0	0	0	0	0	0	0	0	0	0	0	-	-	-	-	-	-	-	-	-	-	-
mix_10138_1	61.53	40.44	9.37	12.16	9.04	7.37	84.35	63.92	7.97	6.89	0	0	--	--	Cellular Component: integral to membrane (GO:0016021);;	--	[S]	Function unknown	--	sp|P40030|ERG28_YEAST	Chromosome 14 open reading frame 1	gi|523421834|emb|CDF88092.1| BN860_02124g1_1 [Zygosaccharomyces bailii CLIB 213]<>gi|578050455|emb|CDH14386.1| probable Ergosterol biosynthetic protein 28 [Zygosaccharomyces bailii ISA1307]	d__Eukaryota 100;k__Fungi 100;p__Ascomycota 100;c__Saccharomycetes 100;o__Saccharomycetales 100;f__Saccharomycetaceae 100;g__Zygosaccharomyces 100;s__Zygosaccharomyces bailii 100;
mix_1013_1	0	5.65	6.72	9.32	1.33	0	0	0	2.3	0	0	0	--	--	--	K08502|1.5e-114|gnl|BL_ORD_ID|13053167|	--	--	--	sp|O74509|VAM7_SCHPO	SNARE complex subunit Vam7	gi|19075292|ref|NP_587792.1| vacuolar SNARE Vam7 (predicted) [Schizosaccharomyces pombe 972h-]<>gi|74582467|sp|O74509.1|VAM7_SCHPO RecName: Full=Vacuolar morphogenesis protein 7 homolog<>gi|3560223|emb|CAA20665.1| vacuolar SNARE Vam7 (predicted) [Schizosaccharomyces pombe]	d__Eukaryota 100;k__Fungi 100;p__Ascomycota 100;c__Schizosaccharomycetes 100;o__Schizosaccharomycetales 100;f__Schizosaccharomycetaceae 100;g__Schizosaccharomyces 100;s__Schizosaccharomyces pombe 100;
mix_10141_1	31.21	18.68	23.24	4.92	1.64	0	32.73	45.65	14.18	5.59	0	0	--	--	--	K18588|1.3e-66|gnl|BL_ORD_ID|14832514|	[I]	Lipid transport and metabolism	--	sp|Q08058|COQ10_YEAST	Cyclase dehydrase	gi|523423130|emb|CDF89425.1| ZYBA0S04-04038g1_1 [Zygosaccharomyces bailii CLIB 213]<>gi|578051149|emb|CDH13551.1| related to Coenzyme Q-binding protein COQ10,mitochondrial [Zygosaccharomyces bailii ISA1307]	d__Eukaryota 100;k__Fungi 100;p__Ascomycota 100;c__Saccharomycetes 100;o__Saccharomycetales 100;f__Saccharomycetaceae 100;g__Zygosaccharomyces 100;s__Zygosaccharomyces bailii 100;
mix_10148_1	0	0	16.57	3.87	0	0.34	0	0	5	8.46	0	0	[O]	Posttranslational modification, protein turnover, chaperones	Molecular Function: ATP binding (GO:0005524);;	K04086|7.4e-119|gnl|BL_ORD_ID|7394358|	[O]	Posttranslational modification, protein turnover, chaperones	--	sp|Q5XCL7|CLPC_STRP6	ATP-dependent CLP protease ATP-binding subunit	gi|949522688|ref|WP_056962211.1| ATP-dependent Clp protease ATP-binding subunit [Lactobacillus manihotivorans]<>gi|948728285|gb|KRL53972.1| clpl [Lactobacillus manihotivorans DSM 13343 = JCM 12514]	d__Bacteria 100;p__Firmicutes 100;c__Bacilli 100;o__Lactobacillales 100;f__Lactobacillaceae 100;g__Lactobacillus 100;s__Lactobacillus manihotivorans 100;
mix_10149_1	0	0	0	0	0	0	5.84	10.71	0	3.97	0	0	[J]	Translation, ribosomal structure and biogenesis	Biological Process: formation of translation preinitiation complex (GO:0001731);; Molecular Function: translation initiation factor activity (GO:0003743);; Cellular Component: nucleus (GO:0005634);; Cellular Component: cytosol (GO:0005829);; Cellular Component: eukaryotic 43S preinitiation complex (GO:0016282);; Molecular Function: translation initiation factor binding (GO:0031369);; Molecular Fu…	K03113|6.3e-53|gnl|BL_ORD_ID|6658776|	[J]	Translation, ribosomal structure and biogenesis	--	sp|P32911|SUI1_YEAST	translation initiation factor	gi|410079146|ref|XP_003957154.1| hypothetical protein KAFR_0D03710 [Kazachstania africana CBS 2517]<>gi|372463739|emb|CCF58019.1| hypothetical protein KAFR_0D03710 [Kazachstania africana CBS 2517]	d__Eukaryota 100;k__Fungi 100;p__Ascomycota 100;c__Saccharomycetes 100;o__Saccharomycetales 100;f__Saccharomycetaceae 100;g__Kazachstania 25;s__Kazachstania africana 25;
mix_10151_1	3.92	2.54	5.15	4.92	0	0	5.41	9.91	0	11.1	0	0	--	--	Cellular Component: integral to membrane (GO:0016021);;	--	--	--	--	sp|P38848|PEX28_YEAST	Integral peroxisomal membrane peroxin	gi|578046747|emb|CDH17879.1| related to Peroxisomal membrane protein PEX28 [Zygosaccharomyces bailii ISA1307]	d__Eukaryota 100;k__Fungi 100;p__Ascomycota 100;c__Saccharomycetes 100;o__Saccharomycetales 100;f__Saccharomycetaceae 100;g__Zygosaccharomyces 100;s__Zygosaccharomyces bailii 100;
mix_10152_1	7.14	4.58	5.66	3.53	4.95	0	8.86	13.44	7.88	2.15	0.28	0	--	--	Cellular Component: integral to membrane (GO:0016021);;	--	--	--	--	sp|P38848|PEX28_YEAST	Integral peroxisomal membrane peroxin	gi|523421577|emb|CDF87818.1| BN860_15170g1_1 [Zygosaccharomyces bailii CLIB 213]	d__Eukaryota 100;k__Fungi 100;p__Ascomycota 100;c__Saccharomycetes 100;o__Saccharomycetales 100;f__Saccharomycetaceae 100;g__Zygosaccharomyces 100;s__Zygosaccharomyces bailii 100;
mix_10157_1	2.33	17.74	13.49	15.88	19.31	2.02	0.72	0	2.48	0.37	0	0	--	--	--	K13333|6.2e-278|gnl|BL_ORD_ID|13048854|	[I]	Lipid transport and metabolism	--	sp|Q9P327|PLB4_SCHPO	phospholipase A2 group	gi|19113684|ref|NP_592772.1| phospholipase (predicted) [Schizosaccharomyces pombe 972h-]<>gi|19113693|ref|NP_592781.1| phospholipase (predicted) [Schizosaccharomyces pombe 972h-]<>gi|48474672|sp|Q9P327.1|PLB4_SCHPO RecName: Full=Putative lysophospholipase C977.09c/C1348.10c; AltName: Full=Phospholipase B; Flags: Precursor<>gi|6742159|emb|CAB69631.1| phospholipase (predicted) [Schizosaccharomyces …	d__Eukaryota 100;k__Fungi 100;p__Ascomycota 100;c__Schizosaccharomycetes 100;o__Schizosaccharomycetales 100;f__Schizosaccharomycetaceae 100;g__Schizosaccharomyces 100;s__Schizosaccharomyces pombe 100;
mix_10159_1	0.38	0	4.33	0.54	0	0	11.64	2.93	0	0	0	0	--	--	Biological Process: spliceosome disassembly (GO:0000390);; Biological Process: maturation of SSU-rRNA from tricistronic rRNA transcript (SSU-rRNA, 5.8S rRNA, LSU-rRNA) (GO:0000462);; Biological Process: maturation of LSU-rRNA from tricistronic rRNA transcript (SSU-rRNA, 5.8S rRNA, LSU-rRNA) (GO:0000463);; Biological Process: maturation of 5.8S rRNA from tricistronic rRNA transcript (SSU-rRNA, 5.8…	K12820|9.3e-241|gnl|BL_ORD_ID|3303924|	[A]	RNA processing and modification	--	sp|P53131|PRP43_YEAST	helicase	gi|50287699|ref|XP_446279.1| hypothetical protein [Candida glabrata CBS 138]<>gi|49525586|emb|CAG59203.1| unnamed protein product [Candida glabrata]<>gi|961769357|gb|KTA95208.1| Pre-mRNA-splicing factor ATP-dependent RNA helicase PRP43 [Candida glabrata]<>gi|961769655|gb|KTA95496.1| Pre-mRNA-splicing factor ATP-dependent RNA helicase PRP43 [Candida glabrata]<>gi|961774503|gb|KTB00011.1| Pre-mRNA-…	d__Eukaryota 100;k__Fungi 100;p__Ascomycota 100;c__Saccharomycetes 100;o__Saccharomycetales 100;f__Saccharomycetaceae 100;g__Saccharomyces 68;s__Saccharomyces cerevisiae 50;
mix_1015_1	1.49	14.81	19.68	19.36	7.46	2.22	0	0	0.46	0.76	0	0	[K]	Transcription	--	K11373|0.0e+00|gnl|BL_ORD_ID|13051490|	[K]	Transcription	--	sp|O59704|ELP1_SCHPO	phosphorylase kinase regulator activity	gi|19112127|ref|NP_595335.1| elongator subunit Iki3 (predicted) [Schizosaccharomyces pombe 972h-]<>gi|74582206|sp|O59704.1|ELP1_SCHPO RecName: Full=Elongator complex protein 1; AltName: Full=Protein iki3<>gi|3135994|emb|CAA19055.1| elongator subunit Iki3 (predicted) [Schizosaccharomyces pombe]	d__Eukaryota 100;k__Fungi 100;p__Ascomycota 100;c__Schizosaccharomycetes 100;o__Schizosaccharomycetales 100;f__Schizosaccharomycetaceae 100;g__Schizosaccharomyces 100;s__Schizosaccharomyces pombe 100;
mix_10160_1	0	0	0	0	0	0	20.03	5.21	0	0	0	0	--	--	Biological Process: spliceosome disassembly (GO:0000390);; Biological Process: maturation of SSU-rRNA from tricistronic rRNA transcript (SSU-rRNA, 5.8S rRNA, LSU-rRNA) (GO:0000462);; Biological Process: maturation of LSU-rRNA from tricistronic rRNA transcript (SSU-rRNA, 5.8S rRNA, LSU-rRNA) (GO:0000463);; Biological Process: maturation of 5.8S rRNA from tricistronic rRNA transcript (SSU-rRNA, 5.8…	K12820|2.2e-69|gnl|BL_ORD_ID|750919|	[A]	RNA processing and modification	--	sp|P53131|PRP43_YEAST	helicase	gi|410074891|ref|XP_003955028.1| hypothetical protein KAFR_0A04580 [Kazachstania africana CBS 2517]<>gi|372461610|emb|CCF55893.1| hypothetical protein KAFR_0A04580 [Kazachstania africana CBS 2517]	d__Eukaryota 100;k__Fungi 100;p__Ascomycota 100;c__Saccharomycetes 100;o__Saccharomycetales 100;f__Saccharomycetaceae 100;g__Saccharomyces 95;s__Saccharomyces cerevisiae 82;
mix_10164_1	71.03	399.02	366.18	629.93	342.69	82.53	3.85	0	21.05	21.25	0.73	0	[J]	Translation, ribosomal structure and biogenesis	--	K02880|6.5e-92|gnl|BL_ORD_ID|13051857|	[J]	Translation, ribosomal structure and biogenesis	--	sp|O14339|RL17A_SCHPO	The globular domain of the protein is located near the polypeptide exit tunnel on the outside of the subunit, while an extended beta-hairpin is found that lines the wall of the exit tunnel in the center of the 70S ribosome (By similarity)	gi|19112503|ref|NP_595711.1| 60S ribosomal protein L17 [Schizosaccharomyces pombe 972h-]<>gi|29839447|sp|O14339.1|RL17A_SCHPO RecName: Full=60S ribosomal protein L17-A<>gi|2239235|emb|CAB10153.1| 60S ribosomal protein L17 [Schizosaccharomyces pombe]	d__Eukaryota 100;k__Fungi 100;p__Ascomycota 100;c__Schizosaccharomycetes 100;o__Schizosaccharomycetales 100;f__Schizosaccharomycetaceae 100;g__Schizosaccharomyces 100;s__Schizosaccharomyces pombe 100;
mix_10165_1	35.2	280.5	260.96	407.82	181.24	35.77	2.83	1.71	23.86	9.05	0	0	[J]	Translation, ribosomal structure and biogenesis	--	K02880|3.0e-92|gnl|BL_ORD_ID|13053217|	[J]	Translation, ribosomal structure and biogenesis	--	sp|O59794|RL17B_SCHPO	The globular domain of the protein is located near the polypeptide exit tunnel on the outside of the subunit, while an extended beta-hairpin is found that lines the wall of the exit tunnel in the center of the 70S ribosome (By similarity)	gi|19075341|ref|NP_587841.1| 60S ribosomal protein L17 [Schizosaccharomyces pombe 972h-]<>gi|6174951|sp|O59794.1|RL17B_SCHPO RecName: Full=60S ribosomal protein L17-B<>gi|2995357|emb|CAA18285.1| 60S ribosomal protein L17 (predicted) [Schizosaccharomyces pombe]	d__Eukaryota 100;k__Fungi 100;p__Ascomycota 100;c__Schizosaccharomycetes 100;o__Schizosaccharomycetales 100;f__Schizosaccharomycetaceae 100;g__Schizosaccharomyces 100;s__Schizosaccharomyces pombe 100;
mix_10166_1	62.29	6.97	6.93	13.06	19.15	2.24	14.76	6.78	52.66	2.47	0	0	-	-	-	-	-	-	-	-	-	-	-
mix_10167_1	9.7	24.33	8.18	38.18	14.87	5.21	8.77	80.67	13.77	42.82	0	0	-	-	-	-	-	-	-	-	-	-	-
mix_10168_1	3443.07	2795.84	3047.44	1734.85	513.25	307.38	1666.05	1986.17	1212.08	806.9	0	1.83	[J]	Translation, ribosomal structure and biogenesis	Molecular Function: GTPase activity (GO:0003924);; Molecular Function: GTP binding (GO:0005525);;	K03234|2.7e-49|gnl|BL_ORD_ID|14833460|	[J]	Translation, ribosomal structure and biogenesis	--	sp|P32324|EF2_YEAST	Catalyzes the GTP-dependent ribosomal translocation step during translation elongation. During this step, the ribosome changes from the pre-translocational (PRE) to the post- translocational (POST) state as the newly formed A-site-bound peptidyl-tRNA and P-site-bound deacylated tRNA move to the P and E sites, respectively. Catalyzes the coordinated movement of the two tRNA molecules, the mRNA and…	gi|578052801|emb|CDH12017.1| Elongation factor 2 [Zygosaccharomyces bailii ISA1307]	d__Eukaryota 100;k__Fungi 100;p__Ascomycota 100;c__Saccharomycetes 100;o__Saccharomycetales 100;f__Saccharomycetaceae 100;g__Zygosaccharomyces 100;s__Zygosaccharomyces bailii 100;
mix_1016_1	0	0	0	0	0	0	0	0	0	0	0	0	--	--	--	--	--	--	--	--	Retrotransposon protein	gi|752455504|gb|AJG39050.1| putative nucleoprotein [Lishi Spider Virus 1]	s__Lishi Spider Virus 1 100;
mix_10171_2	0	0	0	0	0	0	0	0	0	0	0	0	-	-	-	-	-	-	-	-	-	-	-
mix_10173_1	12.45	9.81	5.31	6.62	3.32	0.46	9.63	7.2	1.7	4.53	0	0	--	--	Biological Process: pseudouridine synthesis (GO:0001522);; Molecular Function: RNA binding (GO:0003723);; Molecular Function: pseudouridine synthase activity (GO:0009982);;	K15453|7.1e-165|gnl|BL_ORD_ID|14832779|	[A]	RNA processing and modification	--	sp|P53294|PUS6_YEAST	pseudouridine synthase activity	gi|523421668|emb|CDF87917.1| BN860_17414g1_1 [Zygosaccharomyces bailii CLIB 213]<>gi|578046655|emb|CDH17973.1| related to tRNA pseudouridine(31) synthase [Zygosaccharomyces bailii ISA1307]	d__Eukaryota 100;k__Fungi 100;p__Ascomycota 100;c__Saccharomycetes 100;o__Saccharomycetales 100;f__Saccharomycetaceae 100;g__Zygosaccharomyces 100;s__Zygosaccharomyces bailii 100;
mix_10174_1	8.01	11.67	4.46	4.44	0	1.03	8.55	9.41	4.45	4.22	0	0	--	--	Biological Process: pseudouridine synthesis (GO:0001522);; Molecular Function: RNA binding (GO:0003723);; Molecular Function: pseudouridine synthase activity (GO:0009982);;	K15453|2.8e-152|gnl|BL_ORD_ID|14832779|	[A]	RNA processing and modification	--	sp|P53294|PUS6_YEAST	pseudouridine synthase activity	gi|523421668|emb|CDF87917.1| BN860_17414g1_1 [Zygosaccharomyces bailii CLIB 213]<>gi|578046655|emb|CDH17973.1| related to tRNA pseudouridine(31) synthase [Zygosaccharomyces bailii ISA1307]	d__Eukaryota 100;k__Fungi 100;p__Ascomycota 100;c__Saccharomycetes 100;o__Saccharomycetales 100;f__Saccharomycetaceae 100;g__Zygosaccharomyces 100;s__Zygosaccharomyces bailii 100;
mix_10175_1	11.46	19.37	16.5	11.65	8.24	4.79	20.98	17.4	17.65	8.6	0	0	--	--	--	K17782|9.0e-48|gnl|BL_ORD_ID|14832081|	[S]	Function unknown	--	sp|P36046|MIA40_YEAST	mitochondrial intermembrane space import and assembly protein	gi|523425076|emb|CDF91437.1| ZYBA0S11-02828g1_1 [Zygosaccharomyces bailii CLIB 213]	d__Eukaryota 100;k__Fungi 100;p__Ascomycota 100;c__Saccharomycetes 100;o__Saccharomycetales 100;f__Saccharomycetaceae 100;g__Zygosaccharomyces 100;s__Zygosaccharomyces bailii 100;
mix_10176_1	18.96	20.82	50.54	33.5	13.05	7.79	30.51	25.47	20.82	14.49	0	0.38	--	--	--	K17782|1.3e-46|gnl|BL_ORD_ID|14832081|	[S]	Function unknown	--	sp|P36046|MIA40_YEAST	mitochondrial intermembrane space import and assembly protein	gi|578053741|emb|CDH10890.1| uncharacterized protein ZBAI_02676 [Zygosaccharomyces bailii ISA1307]	d__Eukaryota 100;k__Fungi 100;p__Ascomycota 100;c__Saccharomycetes 100;o__Saccharomycetales 100;f__Saccharomycetaceae 100;g__Zygosaccharomyces 100;s__Zygosaccharomyces bailii 100;
mix_10177_1	3.85	6.32	2.66	10.39	0	0	16.29	0	13.57	2.95	0	0	--	--	Molecular Function: DNA binding (GO:0003677);; Molecular Function: sequence-specific DNA binding transcription factor activity (GO:0003700);; Biological Process: regulation of transcription, DNA-dependent (GO:0006355);; Cellular Component: CCAAT-binding factor complex (GO:0016602);; Molecular Function: protein heterodimerization activity (GO:0046982);;	--	[K]	Transcription	--	sp|Q02516|HAP5_YEAST	Nuclear transcription factor Y	gi|523424286|emb|CDF90628.1| ZYBA0S07-05446g1_1 [Zygosaccharomyces bailii CLIB 213]<>gi|578049653|emb|CDH15003.1| related to Transcriptional activator HAP5 [Zygosaccharomyces bailii ISA1307]	d__Eukaryota 100;k__Fungi 100;p__Ascomycota 100;c__Saccharomycetes 100;o__Saccharomycetales 100;f__Saccharomycetaceae 100;g__Zygosaccharomyces 100;s__Zygosaccharomyces bailii 100;
mix_10177_2	23.64	17.95	18.04	13.81	1.96	4.8	24.41	16.62	18.82	8.97	0	0	--	--	Molecular Function: phosphatidylinositol binding (GO:0035091);;	K17918|3.5e-82|gnl|BL_ORD_ID|14833195|	[U]	Intracellular trafficking, secretion, and vesicular transport	--	sp|Q6FT03|SNX3_CANGA	sorting nexin	gi|523424285|emb|CDF90627.1| ZYBA0S07-05424g1_1 [Zygosaccharomyces bailii CLIB 213]<>gi|578049654|emb|CDH15004.1| probable Sorting nexin-3 [Zygosaccharomyces bailii ISA1307]	d__Eukaryota 100;k__Fungi 100;p__Ascomycota 100;c__Saccharomycetes 100;o__Saccharomycetales 100;f__Saccharomycetaceae 100;g__Zygosaccharomyces 100;s__Zygosaccharomyces bailii 100;
mix_10179_1	15.29	15.75	11.96	8.75	2.89	1.01	7.67	11.19	5.09	4.41	0	0	--	--	Molecular Function: phosphatidylinositol binding (GO:0035091);;	K17918|2.3e-76|gnl|BL_ORD_ID|14833195|	[U]	Intracellular trafficking, secretion, and vesicular transport	--	sp|Q08826|SNX3_YEAST	sorting nexin	gi|523424285|emb|CDF90627.1| ZYBA0S07-05424g1_1 [Zygosaccharomyces bailii CLIB 213]<>gi|578049654|emb|CDH15004.1| probable Sorting nexin-3 [Zygosaccharomyces bailii ISA1307]	d__Eukaryota 100;k__Fungi 100;p__Ascomycota 100;c__Saccharomycetes 100;o__Saccharomycetales 100;f__Saccharomycetaceae 100;g__Zygosaccharomyces 100;s__Zygosaccharomyces bailii 100;
mix_1017_1	0	0	0	0	0	0	14.19	0	0	0	0	0	--	--	Molecular Function: mannosyltransferase activity (GO:0000030);; Cellular Component: fungal-type vacuole (GO:0000324);; Cellular Component: vacuolar membrane (GO:0005774);; Biological Process: glycosphingolipid biosynthetic process (GO:0006688);; Cellular Component: integral to membrane (GO:0016021);;	--	--	--	--	sp|P38287|CSH1_YEAST	glycosyltransferase	gi|398365183|ref|NP_009719.3| mannosylinositol phosphorylceramide synthase catalytic subunit CSH1 [Saccharomyces cerevisiae S288c]<>gi|586300|sp|P38287.1|CSH1_YEAST RecName: Full=Mannosyl phosphorylinositol ceramide synthase CSH1; AltName: Full=CSG1/SUR1 homolog 1<>gi|535470|emb|CAA56510.1| YBR1212 [Saccharomyces cerevisiae]<>gi|536496|emb|CAA85120.1| unnamed protein product [Saccharomyces cerevi…	d__Eukaryota 100;k__Fungi 100;p__Ascomycota 100;c__Saccharomycetes 100;o__Saccharomycetales 100;f__Saccharomycetaceae 100;g__Saccharomyces 100;s__Saccharomyces cerevisiae 90;
mix_10180_1	6.2	8.18	0	5.71	0	0	0.98	7.11	3.3	1.44	0	0	--	--	--	K12772|2.7e-66|gnl|BL_ORD_ID|14834709|	--	--	--	sp|P09937|SPS4_YEAST	NA	gi|523422324|emb|CDF88588.1| BN860_13784g1_1 [Zygosaccharomyces bailii CLIB 213]<>gi|578049966|emb|CDH14533.1| uncharacterized protein ZBAI_06319 [Zygosaccharomyces bailii ISA1307]	d__Eukaryota 100;k__Fungi 100;p__Ascomycota 100;c__Saccharomycetes 100;o__Saccharomycetales 100;f__Saccharomycetaceae 100;g__Zygosaccharomyces 100;s__Zygosaccharomyces bailii 100;
mix_10181_1	12.49	12.1	1.5	6.71	2.24	0.26	1.87	11.5	6.4	2.55	0	0	--	--	--	K12772|7.6e-142|gnl|BL_ORD_ID|14834709|	--	--	--	sp|P09937|SPS4_YEAST	NA	gi|523422324|emb|CDF88588.1| BN860_13784g1_1 [Zygosaccharomyces bailii CLIB 213]<>gi|578049966|emb|CDH14533.1| uncharacterized protein ZBAI_06319 [Zygosaccharomyces bailii ISA1307]	d__Eukaryota 100;k__Fungi 100;p__Ascomycota 100;c__Saccharomycetes 100;o__Saccharomycetales 100;f__Saccharomycetaceae 100;g__Zygosaccharomyces 100;s__Zygosaccharomyces bailii 100;
mix_10182_1	1.92	0.85	1.8	3.55	0	0	0	0	1.54	1.35	0	0	--	--		--	--	--	--	sp|O57044|RDRP_HV19S	--	gi|400131542|emb|CCD33024.1| RNA dependent RNA polymerase [Aspergillus foetidus slow virus 1]	f__Totiviridae 100;g__Victorivirus 100;s__Aspergillus foetidus slow virus 1 100;
mix_10183_1	0	0	3.38	1.45	0	0	14.46	5.22	0.41	0	0	0	[J]	Translation, ribosomal structure and biogenesis	Molecular Function: aminoacyl-tRNA editing activity (GO:0002161);; Molecular Function: valine-tRNA ligase activity (GO:0004832);; Molecular Function: ATP binding (GO:0005524);; Cellular Component: mitochondrion (GO:0005739);; Cellular Component: cytosol (GO:0005829);; Biological Process: valyl-tRNA aminoacylation (GO:0006438);; Biological Process: regulation of translational fidelity (GO:0006450)…	K01873|4.1e-266|gnl|BL_ORD_ID|6656742|	[J]	Translation, ribosomal structure and biogenesis	--	sp|P07806|SYV_YEAST	amino acids such as threonine, to avoid such errors, it has a posttransfer editing activity that hydrolyzes mischarged Thr-tRNA(Val) in a tRNA-dependent manner (By similarity)	gi|410075075|ref|XP_003955120.1| hypothetical protein KAFR_0A05500 [Kazachstania africana CBS 2517]<>gi|372461702|emb|CCF55985.1| hypothetical protein KAFR_0A05500 [Kazachstania africana CBS 2517]	d__Eukaryota 100;k__Fungi 100;p__Ascomycota 100;c__Saccharomycetes 100;o__Saccharomycetales 100;f__Saccharomycetaceae 100;g__Saccharomyces 96;s__Saccharomyces cerevisiae 92;
mix_10184_1	0	0	0	0	0	0	0	0	0	0	0	0	--	--	--	--	--	--	--	--	Retrotransposon protein	gi|752455531|gb|AJG39068.1| glycoprotein [Wuchang Cockraoch Virus 3]	s__Wuchang Cockraoch Virus 3 100;
mix_10185_1	0	0	0	0	0	0	2.06	1.24	0	0	0	0	--	--	--	--	--	--	--	sp|P40159|YNU8_YEAST	NA	gi|578056460|emb|CDH08262.1| uncharacterized protein ZBAI_00044 [Zygosaccharomyces bailii ISA1307]	d__Eukaryota 100;k__Fungi 100;p__Ascomycota 100;c__Saccharomycetes 100;o__Saccharomycetales 100;f__Saccharomycetaceae 100;g__Zygosaccharomyces 100;s__Zygosaccharomyces bailii 100;
mix_10185_2	19.61	27.32	28.29	13.72	6.79	14.23	10.96	23.34	9.02	24.6	0	0	--	--	--	--	--	--	--	--	--	gi|523423018|emb|CDF89308.1| ZYBA0S04-01134g1_1 [Zygosaccharomyces bailii CLIB 213]<>gi|578056461|emb|CDH08263.1| uncharacterized protein ZBAI_00045 [Zygosaccharomyces bailii ISA1307]	d__Eukaryota 100;k__Fungi 100;p__Ascomycota 100;c__Saccharomycetes 100;o__Saccharomycetales 100;f__Saccharomycetaceae 100;g__Zygosaccharomyces 100;s__Zygosaccharomyces bailii 100;
mix_10186_1	0	0	0	0	0	0	0	0	0	0	0	0	-	-	-	-	-	-	-	-	-	-	-
mix_10186_2	0	0	9.61	4.61	18.14	0	10.06	0	8.15	0	0	0	-	-	-	-	-	-	-	-	-	-	-
mix_10187_1	6.23	0	0	0	0	0	0	7.78	0	0	0	0	--	--	--	--	--	--	--	--	--	gi|523423018|emb|CDF89308.1| ZYBA0S04-01134g1_1 [Zygosaccharomyces bailii CLIB 213]<>gi|578056461|emb|CDH08263.1| uncharacterized protein ZBAI_00045 [Zygosaccharomyces bailii ISA1307]	d__Eukaryota 100;k__Fungi 100;p__Ascomycota 100;c__Saccharomycetes 100;o__Saccharomycetales 100;f__Saccharomycetaceae 100;g__Zygosaccharomyces 100;s__Zygosaccharomyces bailii 100;
mix_10188_1	12.34	23.8	18.15	4.24	10.61	1.11	25.2	27.17	14.61	6.84	0	0	--	--	Cellular Component: ribonuclease MRP complex (GO:0000172);; Molecular Function: RNA binding (GO:0003723);; Molecular Function: ribonuclease activity (GO:0004540);; Cellular Component: nucleolar ribonuclease P complex (GO:0005655);; Biological Process: rRNA processing (GO:0006364);; Biological Process: mRNA cleavage (GO:0006379);; Biological Process: tRNA processing (GO:0008033);;	K03538|3.0e-114|gnl|BL_ORD_ID|14831885|	[A]	RNA processing and modification	--	sp|P38336|POP4_YEAST	processing of precursor 4, ribonuclease P MRP subunit (S. cerevisiae)	gi|523422158|emb|CDF88419.1| BN860_09824g1_1 [Zygosaccharomyces bailii CLIB 213]<>gi|578050130|emb|CDH14697.1| related to RNases MRP/P 32.9 kDa subunit [Zygosaccharomyces bailii ISA1307]	d__Eukaryota 100;k__Fungi 100;p__Ascomycota 100;c__Saccharomycetes 100;o__Saccharomycetales 100;f__Saccharomycetaceae 100;g__Zygosaccharomyces 100;s__Zygosaccharomyces bailii 100;
mix_10189_1	0	0	0	0	0	0	0	0	0	0	0	0	--	--	--	--	--	--	--	--	--	gi|578050128|emb|CDH14695.1| uncharacterized protein ZBAI_06481 [Zygosaccharomyces bailii ISA1307]	d__Eukaryota 100;k__Fungi 100;p__Ascomycota 100;c__Saccharomycetes 100;o__Saccharomycetales 100;f__Saccharomycetaceae 100;g__Zygosaccharomyces 100;s__Zygosaccharomyces bailii 100;
mix_10189_2	16.79	14.51	14.74	4.71	0	1.62	30.89	47.18	0	1.77	0	0	--	--	Cellular Component: Set1C/COMPASS complex (GO:0048188);; Biological Process: histone H3-K4 methylation (GO:0051568);;	K14969|8.6e-37|gnl|BL_ORD_ID|14831886|	--	--	--	sp|P38337|SHG1_YEAST	COMPASS (Complex proteins associated with Set1p) component shg1	gi|523422159|emb|CDF88420.1| BN860_09846g1_1 [Zygosaccharomyces bailii CLIB 213]<>gi|578050129|emb|CDH14696.1| related to COMPASS component SHG1 [Zygosaccharomyces bailii ISA1307]	d__Eukaryota 100;k__Fungi 100;p__Ascomycota 100;c__Saccharomycetes 100;o__Saccharomycetales 100;f__Saccharomycetaceae 100;g__Zygosaccharomyces 100;s__Zygosaccharomyces bailii 100;
mix_1018_1	0	0	0	0	0	0	0	0	0	0	0	0	--	--	--	--	--	--	--	--	--	gi|588316405|emb|CCW64556.1| unnamed protein product [Phytomonas sp. isolate EM1]	d__Eukaryota 100;o__Kinetoplastida 100;f__Trypanosomatidae 100;g__Phytomonas 100;s__Phytomonas sp. isolate EM1 100;
mix_10191_1	20.36	20.62	27.48	7.35	1.05	1.46	21.23	29.77	6.33	5.98	0	0	--	--	Cellular Component: ribonuclease MRP complex (GO:0000172);; Molecular Function: RNA binding (GO:0003723);; Molecular Function: ribonuclease activity (GO:0004540);; Cellular Component: nucleolar ribonuclease P complex (GO:0005655);; Biological Process: rRNA processing (GO:0006364);; Biological Process: mRNA cleavage (GO:0006379);; Biological Process: tRNA processing (GO:0008033);;	K03538|2.9e-112|gnl|BL_ORD_ID|14831885|	[A]	RNA processing and modification	--	sp|P38336|POP4_YEAST	processing of precursor 4, ribonuclease P MRP subunit (S. cerevisiae)	gi|523422158|emb|CDF88419.1| BN860_09824g1_1 [Zygosaccharomyces bailii CLIB 213]<>gi|578050130|emb|CDH14697.1| related to RNases MRP/P 32.9 kDa subunit [Zygosaccharomyces bailii ISA1307]	d__Eukaryota 100;k__Fungi 100;p__Ascomycota 100;c__Saccharomycetes 100;o__Saccharomycetales 100;f__Saccharomycetaceae 100;g__Zygosaccharomyces 100;s__Zygosaccharomyces bailii 100;
mix_10192_1	1.94	0.85	0	0	3.57	0	1.84	3.34	0	2.04	0	0	--	--	--	K12870|3.1e-65|gnl|BL_ORD_ID|14834390|	[A]	RNA processing and modification	--	sp|P21374|ISY1_YEAST	premRNAsplicing factor ISY1	gi|578050663|emb|CDH13995.1| related to Pre-mRNA-splicing factor ISY1 [Zygosaccharomyces bailii ISA1307]	d__Eukaryota 100;k__Fungi 100;p__Ascomycota 100;c__Saccharomycetes 100;o__Saccharomycetales 100;f__Saccharomycetaceae 100;g__Zygosaccharomyces 100;s__Zygosaccharomyces bailii 100;
mix_10193_1	61.8	35.23	50.18	29.97	20.01	3.49	51.12	40.91	30.77	12.34	0	0	--	--	--	--	--	--	--	sp|P32618|YEF3_YEAST	Fibronectin type iii domain protein	gi|578055923|emb|CDH08698.1| uncharacterized protein ZBAI_00480 [Zygosaccharomyces bailii ISA1307]	d__Eukaryota 100;k__Fungi 100;p__Ascomycota 100;c__Saccharomycetes 100;o__Saccharomycetales 100;f__Saccharomycetaceae 100;g__Zygosaccharomyces 100;s__Zygosaccharomyces bailii 100;
mix_10194_2	58.01	38.44	32.78	28.9	16.85	6.3	57.41	25.43	26.99	19.65	0	0	--	--	--	--	--	--	--	sp|P32618|YEF3_YEAST	Fibronectin type iii domain protein	gi|578055923|emb|CDH08698.1| uncharacterized protein ZBAI_00480 [Zygosaccharomyces bailii ISA1307]	d__Eukaryota 100;k__Fungi 100;p__Ascomycota 100;c__Saccharomycetes 100;o__Saccharomycetales 100;f__Saccharomycetaceae 100;g__Zygosaccharomyces 100;s__Zygosaccharomyces bailii 100;
mix_10195_1	7.12	4.05	2.91	0.96	1.93	0	5.35	5.28	3.32	2.56	0	0	[R]	General function prediction only	Biological Process: nitrogen compound metabolic process (GO:0006807);; Molecular Function: hydrolase activity, acting on carbon-nitrogen (but not peptide) bonds (GO:0016810);;	K01501|3.8e-131|gnl|BL_ORD_ID|7438235|	[E]	Amino acid transport and metabolism	--	sp|P40447|NIT1_YEAST	nitrilase cyanide hydratase and apolipoprotein n-acyltransferase	gi|523423653|emb|CDF89964.1| ZYBA0S05-05776g1_1 [Zygosaccharomyces bailii CLIB 213]<>gi|578046915|emb|CDH17722.1| related to NIT1-Nitrilase, member of the widely found nitrilase branch of the nitrilase superfamily [Zygosaccharomyces bailii ISA1307]	d__Eukaryota 100;k__Fungi 100;p__Ascomycota 100;c__Saccharomycetes 100;o__Saccharomycetales 100;f__Saccharomycetaceae 100;g__Zygosaccharomyces 100;s__Zygosaccharomyces bailii 100;
mix_10197_1	0	0	3.46	0	0	0	27.09	3.17	0	0	0	0	[J]	Translation, ribosomal structure and biogenesis	Biological Process: ribosomal large subunit assembly (GO:0000027);; Biological Process: nuclear-transcribed mRNA catabolic process (GO:0000956);; Cellular Component: nucleoplasm (GO:0005654);; Cellular Component: nucleolus (GO:0005730);; Cellular Component: ribosome (GO:0005840);; Biological Process: rRNA processing (GO:0006364);; Cellular Component: preribosome, large subunit precursor (GO:00306…	K14815|7.4e-86|gnl|BL_ORD_ID|11997879|	[A]	RNA processing and modification	--	sp|P33201|MRT4_YEAST	50s ribosomal protein L10	gi|767178984|gb|AJS53201.1| Mrt4p [Saccharomyces cerevisiae YJM1447]	d__Eukaryota 100;k__Fungi 100;p__Ascomycota 100;c__Saccharomycetes 100;o__Saccharomycetales 100;f__Saccharomycetaceae 100;g__Saccharomyces 88;s__Saccharomyces cerevisiae 75;
mix_10198_1	1110.42	1112.94	1054.23	338.14	304.76	106.67	1077.51	1848.31	384.12	216.57	0	0	--	--	Cellular Component: membrane (GO:0016020);;	K02272|8.8e-20|gnl|BL_ORD_ID|14832033|	[C]	Energy production and conversion	--	--	cytochrome C oxidase (Subunit	gi|523425027|emb|CDF91388.1| ZYBA0S11-01750g1_1 [Zygosaccharomyces bailii CLIB 213]	d__Eukaryota 100;k__Fungi 100;p__Ascomycota 100;c__Saccharomycetes 100;o__Saccharomycetales 100;f__Saccharomycetaceae 100;g__Zygosaccharomyces 100;s__Zygosaccharomyces bailii 100;
mix_10199_1	1942.68	1457.57	1257.08	520.7	400.13	128.91	1395.53	1680.23	644.46	235.58	0	0	--	--	Cellular Component: membrane (GO:0016020);;	K02272|6.8e-20|gnl|BL_ORD_ID|14832033|	[C]	Energy production and conversion	--	--	cytochrome C oxidase (Subunit	gi|523425027|emb|CDF91388.1| ZYBA0S11-01750g1_1 [Zygosaccharomyces bailii CLIB 213]	d__Eukaryota 100;k__Fungi 100;p__Ascomycota 100;c__Saccharomycetes 100;o__Saccharomycetales 100;f__Saccharomycetaceae 100;g__Zygosaccharomyces 100;s__Zygosaccharomyces bailii 100;
mix_1019_1	0	0	0	18.99	0	0	0	0	0	7.07	0	0	-	-	-	-	-	-	-	-	-	-	-
mix_101_1	1.15	2.3	14.88	11.52	15.66	0.86	0.41	0	1.41	0	0	0	--	--	--	K10729|4.5e-181|gnl|BL_ORD_ID|13049863|	--	--	--	sp|O14216|SLD2_SCHPO	DNA replication regulator sld-2	gi|19114678|ref|NP_593766.1| DNA replication checkpoint protein Drc1 [Schizosaccharomyces pombe 972h-]<>gi|3183332|sp|O14216.1|SLD2_SCHPO RecName: Full=DNA replication regulator sld2; AltName: Full=DNA replication and checkpoint protein 1<>gi|2330841|emb|CAB11071.1| DNA replication checkpoint protein Drc1 [Schizosaccharomyces pombe]	d__Eukaryota 100;k__Fungi 100;p__Ascomycota 100;c__Schizosaccharomycetes 100;o__Schizosaccharomycetales 100;f__Schizosaccharomycetaceae 100;g__Schizosaccharomyces 100;s__Schizosaccharomyces pombe 100;
mix_10200_1	0	0	0	0	0	0	0	0	0	0	0	0	--	--	--	--	--	--	--	--	--	gi|523424598|emb|CDF90950.1| ZYBA0S09-01398g1_1 [Zygosaccharomyces bailii CLIB 213]	d__Eukaryota 100;k__Fungi 100;p__Ascomycota 100;c__Saccharomycetes 100;o__Saccharomycetales 100;f__Saccharomycetaceae 100;g__Zygosaccharomyces 100;s__Zygosaccharomyces bailii 100;
mix_10201_1	37.29	20.09	21.01	10.42	4.63	2.83	25.83	14.87	7.98	3.52	0	0	--	--	Cellular Component: exocyst (GO:0000145);; Biological Process: vesicle docking involved in exocytosis (GO:0006904);;	K19985|1.3e-111|gnl|BL_ORD_ID|14834127|	[U]	Intracellular trafficking, secretion, and vesicular transport	--	sp|P22224|SEC15_YEAST	Exocyst complex component	gi|578047064|emb|CDH17510.1| probable Exocyst complex component SEC15 [Zygosaccharomyces bailii ISA1307]	d__Eukaryota 100;k__Fungi 100;p__Ascomycota 100;c__Saccharomycetes 100;o__Saccharomycetales 100;f__Saccharomycetaceae 100;g__Zygosaccharomyces 100;s__Zygosaccharomyces bailii 100;
mix_10205_1	10.63	13.54	0	68.6	0	7.55	0	0	0	8.4	12.96	13.36	--	--	--	--	--	--	--	--	Enoyl-CoA hydratase	gi|343428042|emb|CBQ71566.1| conserved hypothetical Ustilaginaceae-specific protein [Sporisorium reilianum SRZ2]	d__Eukaryota 100;k__Fungi 100;p__Basidiomycota 100;c__Ustilaginomycetes 100;o__Ustilaginales 100;f__Ustilaginaceae 100;g__Pseudozyma 50;s__Pseudozyma flocculosa 50;
mix_10209_1	12.44	27.69	0	22.56	4.44	3.11	9.83	13.5	15.94	3.4	0	0	--	--	--	--	--	--	--	--	--	gi|523422402|emb|CDF88666.1| BN860_15588g1_1 [Zygosaccharomyces bailii CLIB 213]<>gi|578049892|emb|CDH14459.1| uncharacterized protein ZBAI_06245 [Zygosaccharomyces bailii ISA1307]	d__Eukaryota 100;k__Fungi 100;p__Ascomycota 100;c__Saccharomycetes 100;o__Saccharomycetales 100;f__Saccharomycetaceae 100;g__Zygosaccharomyces 100;s__Zygosaccharomyces bailii 100;
mix_1020_1	0	7.45	0	0	0	0	0	7.25	0	0	0	0	[KB]	--	Molecular Function: histone acetyltransferase activity (GO:0004402);; Cellular Component: cytosol (GO:0005829);; Biological Process: histone acetylation (GO:0016573);; Molecular Function: iron-sulfur cluster binding (GO:0051536);;	K07739|1.1e-56|gnl|BL_ORD_ID|12990309|	[BK]	--	--	sp|Q02908|ELP3_YEAST	Histone acetyltransferase	gi|695112120|gb|KGK38668.1| hypothetical protein JL09_g2238 [Pichia kudriavzevii]	d__Eukaryota 100;k__Fungi 100;p__Ascomycota 100;c__Saccharomycetes 100;o__Saccharomycetales 100;f__Debaryomycetaceae 25;g__Spathaspora 25;s__Spathaspora passalidarum 25;
mix_10210_1	0	0	0	0	0	0	0	0	0	0	0	0	-	-	-	-	-	-	-	-	-	-	-
mix_10210_2	0	0	0	0	0	0	0	0	0	0	0	0	-	-	-	-	-	-	-	-	-	-	-
mix_10214_1	1.7	3.36	0	11.58	4.6	0	8.42	0	4.03	2.63	0	0	-	-	-	-	-	-	-	-	-	-	-
mix_10215_1	31.57	16.46	19.47	15.16	7.59	3.82	31.38	29.9	15.93	6.72	0	0	--	--	--	K18724|7.3e-75|gnl|BL_ORD_ID|14831946|	--	--	--	sp|Q12445|POM34_YEAST	Nuclear pore complex component	gi|523422098|emb|CDF88359.1| BN860_08416g1_1 [Zygosaccharomyces bailii CLIB 213]<>gi|578050191|emb|CDH14758.1| uncharacterized protein ZBAI_06544 [Zygosaccharomyces bailii ISA1307]	d__Eukaryota 100;k__Fungi 100;p__Ascomycota 100;c__Saccharomycetes 100;o__Saccharomycetales 100;f__Saccharomycetaceae 100;g__Zygosaccharomyces 100;s__Zygosaccharomyces bailii 100;
mix_10215_2	0	0	0	0	0	0	0	0	0	0	0	0	-	-	-	-	-	-	-	-	-	-	-
mix_10217_1	33.15	33.02	27.07	20.41	12.27	2.28	50.13	34.17	23.16	8.38	0	0	--	--	--	K18724|1.8e-76|gnl|BL_ORD_ID|14831946|	--	--	--	sp|Q12445|POM34_YEAST	Nuclear pore complex component	gi|523422098|emb|CDF88359.1| BN860_08416g1_1 [Zygosaccharomyces bailii CLIB 213]<>gi|578050191|emb|CDH14758.1| uncharacterized protein ZBAI_06544 [Zygosaccharomyces bailii ISA1307]	d__Eukaryota 100;k__Fungi 100;p__Ascomycota 100;c__Saccharomycetes 100;o__Saccharomycetales 100;f__Saccharomycetaceae 100;g__Zygosaccharomyces 100;s__Zygosaccharomyces bailii 100;
mix_10217_2	12.95	5.51	0	19.76	0	0	11.65	32.18	9.02	0	0	0	-	-	-	-	-	-	-	-	-	-	-
mix_10219_1	0	2.74	3.54	3.44	0	0	0	0	3.02	0	0	0	--	--	--	--	--	--	--	--	--	gi|578046529|emb|CDH18104.1| uncharacterized protein ZBAI_09892 [Zygosaccharomyces bailii ISA1307]	d__Eukaryota 100;k__Fungi 100;p__Ascomycota 100;c__Saccharomycetes 100;o__Saccharomycetales 100;f__Saccharomycetaceae 100;g__Zygosaccharomyces 100;s__Zygosaccharomyces bailii 100;
mix_1021_1	0	0	2.91	0	0	0	14.92	0	0	0	0	0	--	--	Molecular Function: translation repressor activity, nucleic acid binding (GO:0000900);; Molecular Function: mRNA 3'-UTR binding (GO:0003730);; Cellular Component: nucleus (GO:0005634);; Cellular Component: large ribosomal subunit (GO:0015934);; Biological Process: negative regulation of translation (GO:0017148);; Biological Process: ribosomal large subunit biogenesis (GO:0042273);;	K14844|3.2e-57|gnl|BL_ORD_ID|11995843|	[J]	Translation, ribosomal structure and biogenesis	--	sp|Q04373|PUF6_YEAST	Domain-Containing protein	gi|403218092|emb|CCK72584.1| hypothetical protein KNAG_0K02210 [Kazachstania naganishii CBS 8797]	d__Eukaryota 100;k__Fungi 100;p__Ascomycota 100;c__Saccharomycetes 100;o__Saccharomycetales 100;f__Saccharomycetaceae 100;g__Kazachstania 100;s__Kazachstania naganishii 100;
mix_10220_1	2.71	0	0	0	0	0	1.28	4.64	0	0	0	0	--	--	--	--	--	--	--	--	--	gi|578046529|emb|CDH18104.1| uncharacterized protein ZBAI_09892 [Zygosaccharomyces bailii ISA1307]	d__Eukaryota 100;k__Fungi 100;p__Ascomycota 100;c__Saccharomycetes 100;o__Saccharomycetales 100;f__Saccharomycetaceae 100;g__Zygosaccharomyces 100;s__Zygosaccharomyces bailii 100;
mix_10221_1	0	0	0	0.05	0	0	0	0	7.49	0	0	0	--	--	--	--	--	--	--	--	--	gi|578046529|emb|CDH18104.1| uncharacterized protein ZBAI_09892 [Zygosaccharomyces bailii ISA1307]	d__Eukaryota 100;k__Fungi 100;p__Ascomycota 100;c__Saccharomycetes 100;o__Saccharomycetales 100;f__Saccharomycetaceae 100;g__Zygosaccharomyces 100;s__Zygosaccharomyces bailii 100;
mix_10222_1	0	0	0	0	0	0	0	0	0	0	0	0	-	-	-	-	-	-	-	-	-	-	-
mix_10224_1	0	0	0	0	0	0	0	0	0	0	0	0	-	-	-	-	-	-	-	-	-	-	-
mix_10225_1	0	0	0.75	0	0	0	12.36	3.38	0	0	0	0	--	--	Molecular Function: alpha-1,2-mannosyltransferase activity (GO:0000026);; Biological Process: cell wall mannoprotein biosynthetic process (GO:0000032);; Cellular Component: Golgi apparatus (GO:0005794);; Biological Process: N-glycan processing (GO:0006491);; Biological Process: protein O-linked glycosylation (GO:0006493);; Cellular Component: membrane (GO:0016020);;	K10967|3.5e-147|gnl|BL_ORD_ID|8859094|	[G]	Carbohydrate transport and metabolism	--	sp|P27809|KRE2_YEAST	glycosyltransferase family 15 protein	gi|365985195|ref|XP_003669430.1| hypothetical protein NDAI_0C05280 [Naumovozyma dairenensis CBS 421]<>gi|343768198|emb|CCD24187.1| hypothetical protein NDAI_0C05280 [Naumovozyma dairenensis CBS 421]	d__Eukaryota 100;k__Fungi 100;p__Ascomycota 100;c__Saccharomycetes 100;o__Saccharomycetales 100;f__Saccharomycetaceae 100;g__Naumovozyma 100;s__Naumovozyma dairenensis 100;
mix_10226_1	0	0	1.4	0	0.7	0	13.33	3.17	0	0	0	0	[G]	Carbohydrate transport and metabolism	Molecular Function: alpha-1,2-mannosyltransferase activity (GO:0000026);; Biological Process: cell wall mannoprotein biosynthetic process (GO:0000032);; Cellular Component: Golgi membrane (GO:0000139);; Cellular Component: fungal-type vacuole membrane (GO:0000329);; Biological Process: N-glycan processing (GO:0006491);; Biological Process: protein O-linked glycosylation (GO:0006493);; Cellular Co…	K10967|3.0e-173|gnl|BL_ORD_ID|11999614|	[G]	Carbohydrate transport and metabolism	--	sp|P27810|KTR1_YEAST	glycosyltransferase family 15 protein	gi|768469084|gb|AJT81331.1| Ktr1p [Saccharomyces cerevisiae YJM683]<>gi|768480798|gb|AJT93021.1| Ktr1p [Saccharomyces cerevisiae YJM1273]<>gi|768482255|gb|AJT94475.1| Ktr1p [Saccharomyces cerevisiae YJM1311]<>gi|768491592|gb|AJU03794.1| Ktr1p [Saccharomyces cerevisiae YJM1402]<>gi|768494533|gb|AJU06729.1| Ktr1p [Saccharomyces cerevisiae YJM1434]<>gi|768495511|gb|AJU07705.1| Ktr1p [Saccharomyces c…	d__Eukaryota 100;k__Fungi 100;p__Ascomycota 100;c__Saccharomycetes 100;o__Saccharomycetales 100;f__Saccharomycetaceae 100;g__Saccharomyces 92;s__Saccharomyces cerevisiae 85;
mix_10227_1	0	0	0	0	0	0	0	0	0	1.89	0	0	--	--	--	K02152|2.6e-46|gnl|BL_ORD_ID|14835672|	[C]	Energy production and conversion	--	sp|P48836|VATG_YEAST	ATPase, H transporting, lysosomal 13kDa, V1 subunit	gi|578054441|emb|CDH10427.1| related to V-type proton ATPase subunit G [Zygosaccharomyces bailii ISA1307]	d__Eukaryota 100;k__Fungi 100;p__Ascomycota 100;c__Saccharomycetes 100;o__Saccharomycetales 100;f__Saccharomycetaceae 100;g__Zygosaccharomyces 100;s__Zygosaccharomyces bailii 100;
mix_10227_2	0	0	0	0	0	0	0	0	0	0	0	0	-	-	-	-	-	-	-	-	-	-	-
mix_10228_1	0	4.47	0	0	0	0	9.78	0	2.7	0	0	0	--	--	--	K02152|1.2e-45|gnl|BL_ORD_ID|14835672|	[C]	Energy production and conversion	--	sp|P48836|VATG_YEAST	ATPase, H transporting, lysosomal 13kDa, V1 subunit	gi|578054441|emb|CDH10427.1| related to V-type proton ATPase subunit G [Zygosaccharomyces bailii ISA1307]	d__Eukaryota 100;k__Fungi 100;p__Ascomycota 100;c__Saccharomycetes 100;o__Saccharomycetales 100;f__Saccharomycetaceae 100;g__Zygosaccharomyces 100;s__Zygosaccharomyces bailii 100;
mix_1022_1	0	0	0	0	0	0	0	0	0	0	0	0	--	--	Cellular Component: extracellular region (GO:0005576);; Cellular Component: cell wall (GO:0005618);; Biological Process: plant-type cell wall organization (GO:0009664);; Cellular Component: membrane (GO:0016020);;	--	--	--	--	sp|Q9C554|EXPA1_ARATH	loosening and extension of plant cell walls by disrupting non-covalent bonding between cellulose microfibrils and matrix glucans. No enzymatic activity has been found	gi|29467507|dbj|BAC67192.1| expansin [Pyrus communis]	d__Eukaryota 100;k__Viridiplantae 100;p__Streptophyta 100;o__Rosales 100;f__Rosaceae 100;g__Pyrus 100;s__Pyrus communis 50;
mix_10230_1	19.91	12.43	29.69	15.44	3.08	3.23	16.57	14.3	12.01	4.68	0	0	--	--	--	K07126|6.1e-22|gnl|BL_ORD_ID|14831347|	--	--	--	--	Sel1 domain protein repeat-containing protein	gi|523421554|emb|CDF87795.1| BN860_14664g1_1 [Zygosaccharomyces bailii CLIB 213]<>gi|578046723|emb|CDH17855.1| related to Activator of C kinase protein 1 [Zygosaccharomyces bailii ISA1307]	d__Eukaryota 100;k__Fungi 100;p__Ascomycota 100;c__Saccharomycetes 100;o__Saccharomycetales 100;f__Saccharomycetaceae 100;g__Zygosaccharomyces 100;s__Zygosaccharomyces bailii 100;
mix_10233_1	15.88	6.71	8.93	5.28	8.78	3.68	5.42	4.92	6.1	4	0	0	--	--	--	K07126|2.3e-31|gnl|BL_ORD_ID|14831347|	--	--	--	--	Sel1 domain protein repeat-containing protein	gi|523421554|emb|CDF87795.1| BN860_14664g1_1 [Zygosaccharomyces bailii CLIB 213]<>gi|578046723|emb|CDH17855.1| related to Activator of C kinase protein 1 [Zygosaccharomyces bailii ISA1307]	d__Eukaryota 100;k__Fungi 100;p__Ascomycota 100;c__Saccharomycetes 100;o__Saccharomycetales 100;f__Saccharomycetaceae 100;g__Zygosaccharomyces 100;s__Zygosaccharomyces bailii 100;
mix_10234_1	0	0	0	0	0	0	0	0	0	0	0	0	-	-	-	-	-	-	-	-	-	-	-
mix_10234_2	0	0	0	0	17.83	0	0	0	0	0	1.17	0	[TZDR]	--	Molecular Function: calcium ion binding (GO:0005509);; Biological Process: regulation of photomorphogenesis (GO:0010099);;	K02183|1.4e-78|gnl|BL_ORD_ID|12957428|	[T]	Signal transduction mechanisms	--	sp|Q7Y052|CALM_EUPCH	Calcium-binding protein	gi|566185972|ref|XP_006378996.1| hypothetical protein POPTR_0009s02660g [Populus trichocarpa]<>gi|550330898|gb|ERP56793.1| hypothetical protein POPTR_0009s02660g [Populus trichocarpa]	d__Eukaryota 100;k__Viridiplantae 100;p__Streptophyta 100;o__Brassicales 27;f__Brassicaceae 27;g__Arabidopsis 9;s__Arabidopsis thaliana 5;
mix_10235_1	65.28	245.15	347	234.83	215.01	24.82	2.31	2.38	6.78	6.75	0.64	0.41	--	--	--	--	--	--	--	sp|P53693|RDS1_SCHPO	Stress response protein Rds1	gi|19114344|ref|NP_593432.1| conserved fungal protein [Schizosaccharomyces pombe 972h-]<>gi|19860702|sp|P53693.2|RDS1_SCHPO RecName: Full=Protein rds1<>gi|5706513|emb|CAB52275.1| conserved fungal protein [Schizosaccharomyces pombe]	d__Eukaryota 100;k__Fungi 100;p__Ascomycota 100;c__Schizosaccharomycetes 100;o__Schizosaccharomycetales 100;f__Schizosaccharomycetaceae 100;g__Schizosaccharomyces 100;s__Schizosaccharomyces pombe 100;
mix_10235_2	0	0	506.38	0	346.09	231.46	0	0	0	0	0	0	-	-	-	-	-	-	-	-	-	-	-
mix_10236_1	12.08	9.6	6.76	6.49	0.96	0.33	9.84	8.13	4.02	2.12	0	0	--	--	Molecular Function: Rab geranylgeranyltransferase activity (GO:0004663);; Cellular Component: nucleus (GO:0005634);; Cellular Component: cytosol (GO:0005829);; Cellular Component: Rab-protein geranylgeranyltransferase complex (GO:0005968);; Biological Process: protein targeting to membrane (GO:0006612);; Biological Process: ER to Golgi vesicle-mediated transport (GO:0006888);; Biological Process:…	K14050|4.0e-136|gnl|BL_ORD_ID|14831380|	[O]	Posttranslational modification, protein turnover, chaperones	--	sp|Q00618|PGTA_YEAST	(alpha) subunit	gi|254577697|ref|XP_002494835.1| ZYRO0A10758p [Zygosaccharomyces rouxii]<>gi|238937724|emb|CAR25902.1| ZYRO0A10758p [Zygosaccharomyces rouxii]	d__Eukaryota 100;k__Fungi 100;p__Ascomycota 100;c__Saccharomycetes 100;o__Saccharomycetales 100;f__Saccharomycetaceae 100;g__Zygosaccharomyces 100;s__Zygosaccharomyces rouxii 100;
mix_10237_1	14.57	11.87	15.61	4.52	0	0.6	20.29	17.07	9.74	5.63	0	0	--	--	Molecular Function: Rab geranylgeranyltransferase activity (GO:0004663);; Cellular Component: nucleus (GO:0005634);; Cellular Component: cytosol (GO:0005829);; Cellular Component: Rab-protein geranylgeranyltransferase complex (GO:0005968);; Biological Process: protein targeting to membrane (GO:0006612);; Biological Process: ER to Golgi vesicle-mediated transport (GO:0006888);; Biological Process:…	K14050|6.8e-150|gnl|BL_ORD_ID|14831380|	[O]	Posttranslational modification, protein turnover, chaperones	--	sp|Q00618|PGTA_YEAST	(alpha) subunit	gi|254577697|ref|XP_002494835.1| ZYRO0A10758p [Zygosaccharomyces rouxii]<>gi|238937724|emb|CAR25902.1| ZYRO0A10758p [Zygosaccharomyces rouxii]	d__Eukaryota 100;k__Fungi 100;p__Ascomycota 100;c__Saccharomycetes 100;o__Saccharomycetales 100;f__Saccharomycetaceae 100;g__Zygosaccharomyces 100;s__Zygosaccharomyces rouxii 100;
mix_10239_1	0	0	0	0	0	0	0	0	0	0	0	0	--	--	--	--	--	--	--	--	--	gi|578053567|emb|CDH11131.1| uncharacterized protein ZBAI_02917 [Zygosaccharomyces bailii ISA1307]	d__Eukaryota 100;k__Fungi 100;p__Ascomycota 100;c__Saccharomycetes 100;o__Saccharomycetales 100;f__Saccharomycetaceae 100;g__Zygosaccharomyces 100;s__Zygosaccharomyces bailii 100;
mix_10241_1	0	0.62	0	0	0	0	0	0	0	0	0	0	--	--	--	K14763|5.4e-40|gnl|BL_ORD_ID|11999161|	[S]	Function unknown	--	sp|A6ZRW0|NAF1_YEAS7	nuclear assembly factor 1 homolog (S. cerevisiae)	gi|578047275|emb|CDH17387.1| uncharacterized protein ZBAI_09175 [Zygosaccharomyces bailii ISA1307]	d__Eukaryota 100;k__Fungi 100;p__Ascomycota 100;c__Saccharomycetes 100;o__Saccharomycetales 100;f__Saccharomycetaceae 100;g__Zygosaccharomyces 100;s__Zygosaccharomyces bailii 100;
mix_10244_1	39.86	30.52	26.19	18.55	18.14	6.65	38.5	21.89	13.05	12.12	0	0	--	--	--	K14763|5.5e-40|gnl|BL_ORD_ID|11999161|	[S]	Function unknown	--	sp|A6ZRW0|NAF1_YEAS7	nuclear assembly factor 1 homolog (S. cerevisiae)	gi|578047275|emb|CDH17387.1| uncharacterized protein ZBAI_09175 [Zygosaccharomyces bailii ISA1307]	d__Eukaryota 100;k__Fungi 100;p__Ascomycota 100;c__Saccharomycetes 100;o__Saccharomycetales 100;f__Saccharomycetaceae 100;g__Zygosaccharomyces 100;s__Zygosaccharomyces bailii 100;
mix_10247_2	64.74	38.6	10.77	0	9.56	10.06	23.29	75.09	0	3.68	0	1.98	--	--	--	--	--	--	Collagen triple helix repeat (20 copies)	--	--	--	-
mix_10248_1	28.27	26.57	14.25	15.41	7.7	2.24	21.53	10.63	11.07	1.46	0	0	--	--	Cellular Component: nucleus (GO:0005634);;	K14763|3.7e-47|gnl|BL_ORD_ID|14835234|	[S]	Function unknown	--	sp|A6ZRW0|NAF1_YEAS7	nuclear assembly factor 1 homolog (S. cerevisiae)	gi|254585411|ref|XP_002498273.1| ZYRO0G06402p [Zygosaccharomyces rouxii]<>gi|238941167|emb|CAR29340.1| ZYRO0G06402p [Zygosaccharomyces rouxii]	d__Eukaryota 100;k__Fungi 100;p__Ascomycota 100;c__Saccharomycetes 100;o__Saccharomycetales 100;f__Saccharomycetaceae 100;g__Zygosaccharomyces 100;s__Zygosaccharomyces rouxii 100;
mix_1024_1	0	7.06	8.85	23.02	5.71	0	0	0	0	0	0	0	--	--	--	K15053|1.2e-75|gnl|BL_ORD_ID|13052784|	[S]	Function unknown	--	sp|O94730|YG0I_SCHPO	Charged multivesicular body protein	gi|19113414|ref|NP_596622.1| ESCRT III complex subunit (predicted) [Schizosaccharomyces pombe 972h-]<>gi|74583000|sp|O94730.1|YG0I_SCHPO RecName: Full=Uncharacterized protein C1604.18c<>gi|4007770|emb|CAA22351.1| ESCRT III complex subunit (predicted) [Schizosaccharomyces pombe]	d__Eukaryota 100;k__Fungi 100;p__Ascomycota 100;c__Schizosaccharomycetes 100;o__Schizosaccharomycetales 100;f__Schizosaccharomycetaceae 100;g__Schizosaccharomyces 100;s__Schizosaccharomyces pombe 100;
mix_10250_2	0	0	0	0	0	0	0	0	0	0	0	0	--	--	--	--	--	--	Collagen triple helix repeat (20 copies)	--	--	--	-
mix_10251_2	0	0	0	0	0	0	0	0	0	0	0	0	-	-	-	-	-	-	-	-	-	-	-
mix_10252_1	11.52	10.12	3.62	10.56	0	0.83	7.29	7.69	0	2.27	0	0	--	--	--	--	--	--	--	sp|Q12140|BSC1_YEAST	Cell agglutination protein	gi|578052934|emb|CDH11727.1| uncharacterized protein ZBAI_03513 [Zygosaccharomyces bailii ISA1307]	d__Eukaryota 100;k__Fungi 100;p__Ascomycota 100;c__Saccharomycetes 100;o__Saccharomycetales 100;f__Saccharomycetaceae 100;g__Zygosaccharomyces 100;s__Zygosaccharomyces bailii 100;
mix_10252_2	4.44	1.45	0	8.87	0	0	1.56	0	0	0	0	0	-	-	-	-	-	-	-	-	-	-	-
mix_10253_1	12.44	13.64	7.33	13.32	2.42	0.84	19.04	17.79	14.61	15.63	0	0	--	--	--	--	--	--	--	sp|P08640|FLO11_YEAST	Cell agglutination protein	gi|578052934|emb|CDH11727.1| uncharacterized protein ZBAI_03513 [Zygosaccharomyces bailii ISA1307]	d__Eukaryota 100;k__Fungi 100;p__Ascomycota 100;c__Saccharomycetes 100;o__Saccharomycetales 100;f__Saccharomycetaceae 100;g__Zygosaccharomyces 100;s__Zygosaccharomyces bailii 100;
mix_10254_1	1.22	0	5.14	5.07	10.12	0	49.41	14.15	0	0.64	0	0	--	--	--	--	--	--	--	sp|Q01589|SED1_YEAST	NA	gi|403215438|emb|CCK69937.1| hypothetical protein KNAG_0D01860 [Kazachstania naganishii CBS 8797]	d__Eukaryota 100;k__Fungi 100;p__Ascomycota 100;c__Saccharomycetes 100;o__Saccharomycetales 100;f__Saccharomycetaceae 100;g__Kazachstania 100;s__Kazachstania naganishii 100;
mix_10256_1	122	62.09	104.37	74.29	26.73	16.35	73.61	85.19	32.55	16.57	0	0	--	--	--	K17417|6.6e-41|gnl|BL_ORD_ID|14834146|	--	--	--	sp|P19955|RT31_YEAST	mitochondrial 37S ribosomal protein YMR31	gi|523423429|emb|CDF89734.1| ZYBA0S05-00452g1_1 [Zygosaccharomyces bailii CLIB 213]<>gi|578047045|emb|CDH17491.1| related to 37S ribosomal protein YMR-31,mitochondrial [Zygosaccharomyces bailii ISA1307]	d__Eukaryota 100;k__Fungi 100;p__Ascomycota 100;c__Saccharomycetes 100;o__Saccharomycetales 100;f__Saccharomycetaceae 100;g__Zygosaccharomyces 100;s__Zygosaccharomyces bailii 100;
mix_10257_1	187.53	167.68	100.87	110.58	9.07	14.28	168.47	207.32	57.04	22.54	0	0	--	--	--	K17417|5.8e-41|gnl|BL_ORD_ID|14834146|	--	--	--	sp|P19955|RT31_YEAST	mitochondrial 37S ribosomal protein YMR31	gi|523423429|emb|CDF89734.1| ZYBA0S05-00452g1_1 [Zygosaccharomyces bailii CLIB 213]<>gi|578047045|emb|CDH17491.1| related to 37S ribosomal protein YMR-31,mitochondrial [Zygosaccharomyces bailii ISA1307]	d__Eukaryota 100;k__Fungi 100;p__Ascomycota 100;c__Saccharomycetes 100;o__Saccharomycetales 100;f__Saccharomycetaceae 100;g__Zygosaccharomyces 100;s__Zygosaccharomyces bailii 100;
mix_1025_1	0	0	0	0	0	0	12.08	12.31	1.28	0	0	0	[K]	Transcription	Molecular Function: RNA polymerase I activity (GO:0001054);; Molecular Function: DNA binding (GO:0003677);; Cellular Component: DNA-directed RNA polymerase I complex (GO:0005736);; Molecular Function: ribonucleoside binding (GO:0032549);; Biological Process: ribosome biogenesis (GO:0042254);; Biological Process: transcription of nuclear large rRNA transcript from RNA polymerase I promoter (GO:004…	K03002|1.6e-129|gnl|BL_ORD_ID|12000176|	[K]	Transcription	--	sp|P22138|RPA2_YEAST	DNA-dependent RNA polymerase catalyzes the transcription of DNA into RNA using the four ribonucleoside triphosphates as substrates (By similarity)	gi|768882052|gb|AJW10153.1| Rpa135p [Saccharomyces cerevisiae YJM1450]	d__Eukaryota 100;k__Fungi 100;p__Ascomycota 100;c__Saccharomycetes 100;o__Saccharomycetales 100;f__Saccharomycetaceae 100;g__Saccharomyces 100;s__Saccharomyces cerevisiae 89;
mix_10261_1	0	0	0	0	0	0	0	0	0	0	0	0	-	-	-	-	-	-	-	-	-	-	-
mix_10262_1	0	0	0	0	0	0	0	0	0	0	0	0	-	-	-	-	-	-	-	-	-	-	-
mix_10262_2	0	0	0	0	0	0	0	0	0	0	0	0	-	-	-	-	-	-	-	-	-	-	-
mix_10264_1	0	0	0	0	0	0	0	0	0	0	0	0	-	-	-	-	-	-	-	-	-	-	-
mix_10266_1	40.27	65.88	102.08	340.1	32.63	21.35	23.28	63.4	111.96	40.34	6.01	9.24	-	-	-	-	-	-	-	-	-	-	-
mix_10267_1	12.96	19.05	17.06	3.69	2.22	1.03	12.84	17.16	9.22	5.54	0	0	[R]	General function prediction only	--	K04508|3.2e-156|gnl|BL_ORD_ID|14832879|	[B]	Chromatin structure and dynamics	--	sp|P38262|SIF2_YEAST	wd repeat	gi|523423327|emb|CDF89626.1| ZYBA0S04-08768g1_1 [Zygosaccharomyces bailii CLIB 213]<>gi|578050901|emb|CDH13745.1| probable SIR4-interacting protein SIF2 [Zygosaccharomyces bailii ISA1307]	d__Eukaryota 100;k__Fungi 100;p__Ascomycota 100;c__Saccharomycetes 100;o__Saccharomycetales 100;f__Saccharomycetaceae 100;g__Zygosaccharomyces 100;s__Zygosaccharomyces bailii 100;
mix_10268_1	8.02	6.58	5.5	2.7	2.68	0.93	7.06	0	4.7	4.99	0	0	[R]	General function prediction only	--	K04508|1.3e-61|gnl|BL_ORD_ID|14832879|	[B]	Chromatin structure and dynamics	--	sp|P38262|SIF2_YEAST	wd repeat	gi|523423327|emb|CDF89626.1| ZYBA0S04-08768g1_1 [Zygosaccharomyces bailii CLIB 213]<>gi|578050901|emb|CDH13745.1| probable SIR4-interacting protein SIF2 [Zygosaccharomyces bailii ISA1307]	d__Eukaryota 100;k__Fungi 100;p__Ascomycota 100;c__Saccharomycetes 100;o__Saccharomycetales 100;f__Saccharomycetaceae 100;g__Zygosaccharomyces 100;s__Zygosaccharomyces bailii 100;
mix_10269_1	6.61	14.82	15.51	6.64	1.48	0	6.42	10.29	7.25	2.9	0	0	[R]	General function prediction only	--	K04508|3.2e-156|gnl|BL_ORD_ID|14832879|	[B]	Chromatin structure and dynamics	--	sp|P38262|SIF2_YEAST	wd repeat	gi|523423327|emb|CDF89626.1| ZYBA0S04-08768g1_1 [Zygosaccharomyces bailii CLIB 213]<>gi|578050901|emb|CDH13745.1| probable SIR4-interacting protein SIF2 [Zygosaccharomyces bailii ISA1307]	d__Eukaryota 100;k__Fungi 100;p__Ascomycota 100;c__Saccharomycetes 100;o__Saccharomycetales 100;f__Saccharomycetaceae 100;g__Zygosaccharomyces 100;s__Zygosaccharomyces bailii 100;
mix_1026_1	0	0	0	0	0	0	0	0	0	0	0	0	[OD]	--	--	K03358|5.4e-24|gnl|BL_ORD_ID|13049515|	[DO]	--	--	sp|Q9UT86|APC11_SCHPO	protein ubiquitination	gi|1842136|dbj|BAA19216.1| unnamed protein product [Schizosaccharomyces pombe]	d__Eukaryota 100;k__Fungi 100;p__Ascomycota 100;c__Schizosaccharomycetes 100;o__Schizosaccharomycetales 100;f__Schizosaccharomycetaceae 100;g__Schizosaccharomyces 100;s__Schizosaccharomyces pombe 100;
mix_10272_1	0	4.38	0	0	10.98	1.28	0	0	0	13.22	0.72	1.13	--	--	--	--	--	--	Collagen triple helix repeat (20 copies)	--	--	--	-
mix_10273_1	0	0	3.62	0	0.6	0	14.17	2.72	0	0	0	0	[J]	Translation, ribosomal structure and biogenesis	Molecular Function: nucleic acid binding (GO:0003676);; Molecular Function: alanine-tRNA ligase activity (GO:0004813);; Molecular Function: ATP binding (GO:0005524);; Cellular Component: mitochondrion (GO:0005739);; Molecular Function: zinc ion binding (GO:0008270);; Biological Process: mitochondrial alanyl-tRNA aminoacylation (GO:0070143);;	K01872|1.4e-182|gnl|BL_ORD_ID|6659149|	[J]	Translation, ribosomal structure and biogenesis	--	sp|P40825|SYA_YEAST	Catalyzes the attachment of alanine to tRNA(Ala) in a two-step reaction alanine is first activated by ATP to form Ala- AMP and then transferred to the acceptor end of tRNA(Ala). Also edits incorrectly charged Ser-tRNA(Ala) and Gly-tRNA(Ala) via its editing domain (By similarity)	gi|410079893|ref|XP_003957527.1| hypothetical protein KAFR_0E02390 [Kazachstania africana CBS 2517]<>gi|372464113|emb|CCF58392.1| hypothetical protein KAFR_0E02390 [Kazachstania africana CBS 2517]	d__Eukaryota 100;k__Fungi 100;p__Ascomycota 100;c__Saccharomycetes 100;o__Saccharomycetales 100;f__Saccharomycetaceae 100;g__Kazachstania 50;s__Kazachstania africana 50;
mix_10274_1	0	0	0	0	0	0	0	0	0	0.61	0	0	--	--	--	--	--	--	--	--	Retrotransposon protein	gi|693764270|ref|YP_009072448.1| RNA-dependent RNA polymerase [Leptopilina boulardi Toti-like virus]<>gi|545793674|gb|AGW80479.1| RNA-dependent RNA polymerase [Leptopilina boulardi Toti-like virus]	f__Totiviridae 100;s__Leptopilina boulardi RNA virus 100;
mix_10276_1	0	0	0	0	0	0	0	0	0	0	0	0	--	--	--	--	--	--	--	--	NA	gi|1028570305|gb|OAJ38609.1| hypothetical protein BDEG_22519 [Batrachochytrium dendrobatidis JEL423]	d__Eukaryota 100;k__Fungi 100;p__Chytridiomycota 100;c__Chytridiomycetes 100;o__Rhizophydiales 100;g__Batrachochytrium 100;s__Batrachochytrium dendrobatidis 100;
mix_10279_1	96.53	79.75	66.74	39.26	34.63	7.83	85.34	81.86	38.6	22.37	0	0	[P]	Inorganic ion transport and metabolism	Molecular Function: superoxide dismutase activity (GO:0004784);; Biological Process: removal of superoxide radicals (GO:0019430);; Molecular Function: metal ion binding (GO:0046872);; Biological Process: oxidation-reduction process (GO:0055114);;	K04564|9.0e-128|gnl|BL_ORD_ID|14831202|	[P]	Inorganic ion transport and metabolism	--	sp|P10662|RT01_YEAST	Destroys radicals which are normally produced within the cells and which are toxic to biological systems (By similarity)	gi|523421066|emb|CDF87289.1| BN860_03026g1_1 [Zygosaccharomyces bailii CLIB 213]	d__Eukaryota 100;k__Fungi 100;p__Ascomycota 100;c__Saccharomycetes 100;o__Saccharomycetales 100;f__Saccharomycetaceae 100;g__Zygosaccharomyces 100;s__Zygosaccharomyces bailii 100;
mix_1027_1	0	5.51	0	29.64	0	0	0	0	0	0	0	0	[OD]	--	--	K03358|2.1e-54|gnl|BL_ORD_ID|13049515|	[DO]	--	--	sp|Q9UT86|APC11_SCHPO	protein ubiquitination	gi|19114335|ref|NP_593423.1| anaphase-promoting complex subunit Apc11 [Schizosaccharomyces pombe 972h-]<>gi|30913533|sp|Q9UT86.1|APC11_SCHPO RecName: Full=Anaphase-promoting complex subunit 11; AltName: Full=20S cyclosome/APC complex protein apc11<>gi|5706504|emb|CAB52266.1| anaphase-promoting complex subunit Apc11 [Schizosaccharomyces pombe]	d__Eukaryota 100;k__Fungi 100;p__Ascomycota 100;c__Schizosaccharomycetes 100;o__Schizosaccharomycetales 100;f__Schizosaccharomycetaceae 100;g__Schizosaccharomyces 100;s__Schizosaccharomyces pombe 100;
mix_10280_1	26.27	28.76	28.2	20.56	16.85	4.57	49.03	34.11	34.58	13.14	0	0.19	[P]	Inorganic ion transport and metabolism	Molecular Function: superoxide dismutase activity (GO:0004784);; Biological Process: removal of superoxide radicals (GO:0019430);; Molecular Function: metal ion binding (GO:0046872);; Biological Process: oxidation-reduction process (GO:0055114);;	K04564|8.1e-129|gnl|BL_ORD_ID|14831202|	[P]	Inorganic ion transport and metabolism	--	sp|P10662|RT01_YEAST	Destroys radicals which are normally produced within the cells and which are toxic to biological systems (By similarity)	gi|523421066|emb|CDF87289.1| BN860_03026g1_1 [Zygosaccharomyces bailii CLIB 213]	d__Eukaryota 100;k__Fungi 100;p__Ascomycota 100;c__Saccharomycetes 100;o__Saccharomycetales 100;f__Saccharomycetaceae 100;g__Zygosaccharomyces 100;s__Zygosaccharomyces bailii 100;
mix_10281_1	31.21	27.24	41.5	27.87	24.53	3.99	33.57	48.69	21.26	6.21	0	0	[R]	General function prediction only	--	K07208|3.2e-84|gnl|BL_ORD_ID|14833894|	[R]	General function prediction only	--	sp|P25378|RHEB_YEAST	GTP-binding Protein	gi|578053104|emb|CDH11604.1| probable Rheb-like protein RHB1 [Zygosaccharomyces bailii ISA1307]	d__Eukaryota 100;k__Fungi 100;p__Ascomycota 100;c__Saccharomycetes 100;o__Saccharomycetales 100;f__Saccharomycetaceae 100;g__Zygosaccharomyces 100;s__Zygosaccharomyces bailii 100;
mix_10283_1	0	0	0	0	0	0	0	0	0	0	0	0	-	-	-	-	-	-	-	-	-	-	-
[truncated: 32,132 more rows]
